# Supplementary material for: Proteomic signatures of smoking and their associations with risk of incident diseases and mortality in diverse populations
Source: Nat Commun. 2025 Dec 24;17:928. doi: 10.1038/s41467-025-67656-x (PMC12830939; doi:10.1038/s41467-025-67656-x)
Supplement: Supplementary file 6 — Source Data [file 41467_2025_67656_MOESM6_ESM.xlsx]

## Sheet: figure 2 b
DKK4	CSPG4	CST5	CXCL17	EDIL3	DPP6	EBI3_IL27	CLEC10A	CEACAM5	CELSR2	HEPH	IL12B	ICAM5	IGFBP4	TINAGL1	TFF2	TNFSF12	TNR	ADGRE2	ACVRL1	ACRV1	TSPAN1	CA4	BPIFB1	CD207	CD1C	CD101	ALDH3A1	SLITRK1	ALPP	MMP12	MIA	MSMB	NCAM1	SELPLG	SCGB1A1	SCGB3A2	SCGB3A1	MERTK	PRL	PZP	PDCD1	PCDH17	PDGFRA	OPTC	PIGR	KIT	LAMP3	KLK13	IL7R
-0.130132	0.021235	0.226309	-0.499659	-0.0474105	-0.102024	0.185341	-0.114527	0.156651	0.154471	-0.0586591	-0.224778	0.0198025	0.363232	0.072155	-0.194417	0.214129	-0.051306	0.104846	-0.137681	0.275622	-0.0242617	-0.273494	0.0538973	0.045527	-0.074594	-0.102058	-0.110101	-0.18875	-0.503948	-0.066364	-0.143029	0.0458858	-0.132626	0.0109046	0.145341	-0.0971759	0.0524834	-0.150769	0.19278	0.0955277	0.102987	0.211215	-0.142332	0.108707	-0.130001	-0.306202	-0.0787714	0.412128	-0.29072
0.252905	-0.250859	0.245168	0.897751	-0.135454	-0.360667	-0.0920988	-0.0919551	-0.107552	-0.314153	-0.0102491	-0.190188	0.31058	-0.205508	0.0855679	0.0435077	-0.32911	0.168074	0.19123	-0.230957	0.237935	-0.0576019	-0.15628	-0.0856987	-0.0770887	-0.04206	-0.147544	-0.0838018	-0.0466002	-0.560547	0.13017	-0.0129202	0.0574308	-0.123226	-0.144805	-0.213986	-0.0344093	-0.25904	0.219289	-0.0759748	0.0404861	-0.119053	-0.180033	-0.330934	0.033563	-0.153888	0.180401	-0.0724589	-0.183786	-0.181814
-0.297318	-0.150714	-0.138517	0.130186	0.293328	-0.366812	-0.0799814	-0.0521067	-0.0349679	-0.0795204	-0.0815861	0.251611	0.0610327	0.275528	-0.19527	0.0939852	-0.339893	-0.448759	-0.108777	0.0540777	0.439129	-0.0822489	0.0377697	0.167283	0.0850654	-0.0429327	0.0662458	-0.0641233	-0.307028	-0.609689	0.111096	-0.173638	0.0213024	-0.127937	0.206224	-0.45572	0.0821299	-0.0326292	-0.165769	-0.0490154	0.0519583	-0.139356	0.070869	0.0683317	0.046176	-0.1531	0.204754	0.359925	0.475533	-0.168513
0.264439	0.159686	0.249753	-0.270356	0.0545693	0.220531	0.146481	-0.0802108	-0.238239	-0.139149	0.120581	0.201195	-0.332841	-0.0820499	0.175144	-0.240832	0.191714	0.129218	0.228209	-0.295853	-0.142849	-0.0526704	-0.0208937	-0.18181	-0.115422	0.040908	-0.154625	-0.227445	0.397602	-0.554284	-0.0151681	0.00925746	0.0586144	0.379367	0.178924	0.0753399	-0.0424618	-0.0190602	0.25546	-0.0305278	0.125906	-0.138158	0.330155	-0.0867418	0.00503812	0.0524635	0.0121709	-0.0782213	0.315036	0.0934167
0.296827	0.257675	-0.0201996	1.58417	0.0521856	0.107502	-0.0615255	0.122628	0.208881	-0.252987	0.0825394	0.00837853	0.314972	0.17486	-0.262099	0.359787	-0.280343	0.167102	-0.118312	0.617747	0.0287591	-0.0278971	0.343896	0.204251	0.312945	0.2215	0.156313	0.269832	-0.0289506	2.05772	0.136503	-0.124464	0.186984	-0.121606	-0.0473191	0.149878	0.0844184	0.222806	0.19297	-0.12168	-0.117166	-0.27835	0.127301	0.135181	0.0565942	0.166608	0.197961	0.263058	0.501702	0.108357
0.178254	0.0279549	-0.0251281	-0.383796	-0.0503076	-0.128518	-0.106695	0.0944784	-0.0684631	-0.121378	-0.122209	-0.360848	-0.0997534	-0.224625	-0.214295	-0.0957228	-0.0682851	0.0921651	-0.308667	-0.358751	0.0259765	-0.0860283	0.190278	0.223047	-0.0276529	-0.0457995	0.14023	-0.237119	-0.0744719	-0.106309	0.0972891	0.0606037	-0.140092	-0.171872	-0.182677	-0.081881	0.0639327	-0.0821198	-0.164165	0.178132	-0.394636	-0.132709	-0.355798	0.0671001	0.00556389	-0.101551	-0.0403035	0.0485468	-0.229589	0.0649257
0.296429	0.0562943	0.16995	1.66429	0.263014	0.158712	-0.050113	-0.0715408	0.227893	0.132212	0.150728	0.320984	0.0778795	-0.147672	0.272984	0.252292	0.165448	0.18752	0.114019	0.291059	-0.0957397	-0.0160951	0.284671	0.201185	0.237913	-0.00905342	0.0941078	0.292273	0.2358	1.62739	0.135669	0.206117	0.0917976	0.227984	0.155607	0.18831	0.0102981	0.337593	0.0308527	0.138202	-0.379552	0.242545	0.293976	0.0761878	0.0546177	0.151274	0.21498	0.251661	-0.112606	0.160476
-0.371346	0.0447634	0.0313876	0.123976	0.335678	0.319722	0.131069	0.069457	0.226454	0.25148	0.132871	0.265397	0.317243	0.299175	0.0470572	0.348783	-0.15473	0.201406	-0.0799474	0.582125	0.287108	-0.0544175	0.201978	-0.202276	0.0369078	0.202285	0.10053	0.275421	-0.00107301	0.899348	0.199324	-0.0717688	0.047548	0.258447	0.15453	0.238432	0.0844184	0.296779	0.056657	-0.0167935	0.129087	-0.123079	0.0778513	-0.108734	0.0843349	0.196849	0.00379795	0.0249472	-0.101976	0.151295
0.242189	-0.191674	-0.0446484	-0.474349	-0.114633	-0.280502	-0.108185	-0.0746665	-0.0865254	-0.281259	0.115977	0.264438	-0.226265	0.320665	-0.225437	0.27742	-0.209355	-0.407802	-0.21719	-0.243603	-0.129237	-0.0561077	0.10255	0.239583	-0.162074	0.0805551	-0.112445	-0.173122	0.305198	-0.354458	0.151416	-0.161139	0.00909854	-0.154494	-0.142155	-0.277921	-0.00931271	-0.219292	-0.130609	0.198124	0.12266	-0.0592997	-0.278137	0.095777	0.101585	0.0792809	0.378529	-0.0521715	-0.200263	0.0744786
0.160465	0.207151	0.189291	-0.546704	-0.128697	0.274337	-0.0513388	-0.0720475	-0.205631	0.159375	-0.0545406	0.276931	-0.140551	-0.241349	0.012699	-0.207855	-0.129821	0.0966801	-0.03974	-0.359104	0.380374	0.308498	-0.299888	0.0153043	-0.0943848	-0.0270786	-0.0761584	-0.139135	0.399522	0.292057	-0.0586646	0.290508	-0.127978	-0.0768935	-0.175337	0.0666536	-0.0348428	-0.250197	0.117966	-0.12252	0.156314	0.00890409	0.15334	-0.105653	0.021587	0.0405818	-0.146959	-0.0716626	-0.0735788	0.0685186
0.162146	-0.160283	-0.200752	-0.103976	-0.155556	-0.168374	-0.123854	-0.142444	-0.090266	-0.133672	-0.0296384	0.0884293	0.351253	-0.159749	-0.185113	-0.147143	-0.0369807	0.127046	-0.0558752	-0.403203	-0.0359532	-0.0740026	-0.295758	-0.22285	-0.115603	-0.0348991	-0.162344	-0.171034	-0.152598	-0.411335	-0.295164	-0.202923	-0.098341	-0.157275	-0.0986905	0.191435	0.104829	-0.0481397	0.225985	-0.104605	0.107702	-0.133679	0.0216226	0.10647	0.0513572	-0.145059	-0.145359	-0.0925044	-0.0457769	-0.194273
0.132109	-0.167828	-0.0344178	-0.498411	0.363027	-0.0679218	-0.127375	0.0628897	0.14837	-0.111504	0.099293	0.118669	0.346888	-0.0404336	-0.122752	-0.000791058	-0.310295	0.186938	0.00468093	-0.3671	0.271155	-0.0714658	0.0996039	-0.233195	0.398549	-0.190707	0.166266	-0.202591	0.278092	-0.324307	0.160292	-0.0730826	-0.102831	-0.118624	-0.153615	0.0758952	-0.0549467	-0.276509	-0.142739	-0.169378	0.10645	0.0428063	-0.149567	-0.0828814	0.0304035	0.000206945	0.358092	-0.0758692	0.327309	-0.225203
0.201387	-0.0159253	-0.176105	-0.42385	0.0954352	-0.108679	-0.0941593	-0.123344	-0.315137	0.132775	0.120659	-0.0638562	-0.34684	-0.164423	0.0807389	0.109393	-0.0967943	-0.0215247	-0.102961	0.433412	-0.125643	-0.0715542	-0.288657	0.0294939	-0.0771159	-0.0373776	-0.150571	-0.114852	-0.196813	-0.619634	-0.0758984	-0.208634	-0.0780265	-0.145526	0.208438	-0.316445	0.0278105	0.204129	-0.0927732	-0.168234	0.125716	-0.125491	0.0923012	0.0943852	0.0452907	0.0695174	-0.0319572	-0.0745018	-0.124387	0.098061
0.265123	0.0709939	0.208625	-0.466934	0.029835	0.130564	-0.0904142	0.126079	-0.258809	0.105347	-0.00607533	0.0162617	-0.0666367	-0.261974	0.0428627	-0.264052	0.234449	0.14958	0.0395615	-0.36866	0.0285377	0.299906	0.235482	-0.20973	-0.10353	-0.239563	-0.105222	0.208262	0.317288	-0.599632	-0.0565216	0.284182	-0.128834	-0.116491	0.000158089	-0.031695	-0.0534492	-0.00482755	-0.00797533	0.145185	0.0904541	0.266051	0.0436881	0.0830987	0.079331	-0.145563	0.125595	-0.0938822	-0.092775	0.108813
0.283185	0.0901845	-0.156661	1.72152	0.10997	0.0931574	0.151276	0.135858	0.273286	-0.17925	0.0940189	-0.243851	0.0956433	0.27978	0.159038	0.295438	0.186793	0.164266	0.238315	0.581513	-0.0670025	-0.00169659	0.133121	0.245584	0.332079	0.062108	0.15393	0.275373	-0.247126	2.06401	0.162332	-0.102682	0.0458025	0.10171	-0.0129174	-0.0541872	0.0530553	0.356995	-0.0982048	-0.0316964	0.0962267	-0.105235	0.0888397	0.0894737	0.0645079	0.0850438	0.0233161	0.28006	0.442917	0.120375
-0.142616	-0.253289	0.247862	-0.450553	0.0678454	-0.080131	-0.146397	-0.123452	-0.206589	0.130283	0.00252237	-0.235609	-0.032639	0.381154	0.0470621	-0.0334406	0.236612	0.0707798	-0.117759	-0.298106	-0.186687	-0.0857803	0.0659587	-0.0633707	-0.147578	0.306974	0.0582533	0.318885	-0.348654	-0.240498	0.0219239	-0.146639	-0.0426036	-0.159067	-0.161848	-0.313147	0.00103682	0.0621759	-0.217354	-0.195718	0.046884	-0.112631	0.130162	0.0558792	-0.201855	-0.0953148	0.187304	-0.0804132	-0.124751	0.111342
0.298772	0.0425323	-0.0310801	-0.480399	-0.133731	0.3678	0.151526	-0.0648815	0.216344	0.143808	-0.15809	0.344416	-0.244709	-0.227047	-0.108514	0.0463875	0.136476	0.153945	-0.104446	-0.327924	0.254919	-0.0799882	-0.251806	0.00380721	-0.0166737	0.0492322	-0.085478	-0.371658	0.279153	-0.586061	0.163804	0.239391	0.127088	-0.0811894	-0.171888	-0.0986546	-0.00256795	-0.271864	-0.0333885	0.200141	0.0331115	0.340328	0.412788	-0.0670955	0.0645768	-0.170429	0.154661	-0.0930021	-0.198061	0.0850026
-0.169833	-0.176896	0.159309	0.534895	0.0937912	-0.0589659	0.244681	0.0973254	0.276342	0.141003	0.102233	0.306896	0.0713128	-0.225798	0.130968	0.149673	-0.0425301	0.145244	-0.0368996	0.0568168	0.197832	-0.0623359	0.0643895	0.00692936	0.324146	-0.0192167	-0.120582	0.281341	-0.266043	0.408241	0.129794	-0.00522172	0.00249166	-0.0745057	0.274759	0.186647	-0.0837357	0.0667349	-0.171647	-0.0374533	0.103419	-0.1512	-0.084877	0.14981	-0.22858	0.017738	0.405029	-0.0714638	0.231021	0.0886121
-0.412251	0.0241814	-0.151288	-0.421627	-0.0936939	-0.0651597	-0.0805706	-0.0271163	-0.0169767	0.134511	-0.167547	-0.289964	-0.261832	0.277604	-0.131592	0.0480483	0.195142	0.0776533	-0.270038	-0.299942	-0.123045	-0.0952046	0.141016	-0.0103331	0.26293	-0.0485813	0.0539345	0.291205	0.326975	-0.656659	0.138398	-0.119467	-0.0940079	0.316153	0.202251	0.14139	-0.0701339	-0.394429	0.249119	0.153354	0.0715493	-0.285017	-0.193188	0.0811659	0.0726326	-0.017243	-0.18408	0.0276745	0.0708945	0.0877793
-0.0465544	-0.147487	-0.0464021	-0.394197	-0.0942389	-0.111547	-0.00872677	0.00117999	-0.231655	0.133867	0.0870061	-0.14207	0.00711347	-0.223937	0.0252136	0.0198052	0.220976	0.0200595	-0.154764	0.172114	-0.161689	-0.058956	-0.276847	0.266745	-0.0838706	-0.0574164	-0.114624	-0.165406	-0.0400266	-0.585551	-0.308537	-0.205334	0.0492864	0.311257	-0.17712	-0.108393	-0.0137761	-0.273767	0.268931	-0.0602207	0.0181174	-0.151956	0.257953	-0.143115	0.0283082	0.0206177	-0.352856	-0.0802851	-0.0285641	0.0728588
0.102388	0.0323163	-0.0607884	-0.171987	-0.122496	-0.122786	-0.0483086	-0.130184	0.126702	0.19656	-0.105936	0.263307	-0.147168	-0.112785	0.230614	0.301453	0.179334	0.191307	0.244184	-0.346202	-0.114977	0.356998	-0.2898	-0.211861	-0.122481	-0.0396852	-0.081967	-0.302475	-0.371082	-0.388678	-0.026069	-0.224175	-0.140854	0.331051	0.239719	-0.277879	0.0713182	0.103057	0.242197	-0.0841936	-0.206226	-0.100836	0.112268	-0.065496	-0.0059254	-0.135022	-0.0363076	-0.0694629	-0.233046	0.0932295
0.260688	0.192706	0.138392	1.60223	0.269124	0.0820018	0.114363	0.116632	0.230721	0.138095	0.0959249	0.288422	0.293725	0.236557	0.249518	0.276053	0.0955022	0.187907	0.177518	0.247924	-0.0495211	0.00396595	0.159903	0.249321	0.23637	0.171238	0.127977	0.287114	0.27962	1.8246	0.107693	0.0894015	0.0279336	0.168097	0.168759	0.333891	0.093058	0.177371	0.141593	0.142038	-0.48086	0.233053	0.245384	0.109202	0.0819529	0.141543	0.166417	0.233154	0.0860284	0.160203
-0.115405	-0.144113	0.199157	-0.317051	-0.095618	-0.351883	-0.0840571	-0.140539	0.129992	0.0908278	-0.157239	0.212204	-0.0919736	-0.187673	0.0818377	0.117445	0.288016	-0.0664975	-0.0197166	-0.387091	-0.103516	-0.0789587	0.12858	0.161214	0.131908	0.0343735	0.108561	0.296298	0.0283609	-0.547929	-0.0748455	0.144945	0.0809286	-0.130742	0.300161	-0.0383632	-0.0508889	0.0283752	0.302901	-0.0187632	0.0899353	0.193579	-0.139564	0.155431	0.0700402	-0.131358	0.38548	-0.0918537	0.281704	-0.265123
-0.108205	0.0164109	0.328922	-0.509798	-0.114302	-0.112311	0.0446269	-0.127303	-0.260475	0.136953	-0.0112099	0.261754	-0.0618785	-0.162759	0.0862746	-0.239286	0.048707	0.0360178	0.254817	-0.333524	-0.113709	-0.066069	-0.369138	0.213922	-0.0475481	0.0403649	-0.0671069	0.27316	-0.038418	-0.0829769	-0.094323	0.0634055	-0.150732	0.125659	0.209974	0.135546	0.0803044	0.33651	-0.118153	-0.133694	0.0633731	0.239543	0.119154	-0.0801195	-0.218863	0.0875661	-0.319871	-0.0828315	0.199176	0.100633
0.261555	0.341701	-0.0782542	-0.40624	-0.145306	0.367493	-0.112938	0.0982304	-0.305166	-0.0910572	-0.215867	-0.268244	-0.0374376	0.324377	0.0666154	0.111432	0.138514	0.0957424	0.16739	-0.198111	-0.0434674	-0.103839	-0.124103	0.0368263	0.0539451	-0.0339687	0.126106	0.249394	0.0397837	0.440664	-0.0876076	-0.140239	-0.0699068	0.278617	0.25359	-0.228476	0.0738494	-0.0332278	-0.143194	-0.0323873	0.126971	-0.0360274	-0.282936	-0.2238	0.0249986	-0.189199	0.162831	-0.07096	-0.254766	0.0986839
-0.494716	-0.286052	-0.187743	-0.395487	0.0170314	-0.273042	-0.0761212	0.0713258	-0.0522578	-0.132576	0.103034	-0.242568	0.320901	0.225704	-0.240257	-0.0275126	-0.0409163	0.118974	-0.395519	0.130115	0.0422278	-0.0827416	0.0895836	0.1418	0.250836	-0.0152522	0.114189	-0.309094	-0.296022	-0.324725	-0.0746119	0.0605689	0.0458549	-0.0964322	-0.125819	0.101522	-0.0992568	-0.198117	-0.171337	0.230979	0.13619	-0.0973423	-0.360746	0.0739758	0.0956413	-0.180966	0.231265	0.0471503	0.281875	0.0595702
0.263293	-0.302954	-0.0818665	-0.551195	0.029457	0.1094	-0.0671825	-0.111993	-0.0880213	-0.125744	-0.0267847	0.33989	-0.320586	-0.227173	0.0635157	0.0880033	0.203139	-0.47603	-0.00485508	0.0865934	0.0965865	0.0610047	0.15608	0.151791	-0.121366	-0.0410625	-0.158057	-0.0944135	0.319589	-0.626646	-0.299448	-0.221549	0.0306652	-0.108011	-0.137143	0.0416128	-0.0851155	-0.0274861	0.281545	0.232027	0.1113	-0.159155	0.100969	-0.0593711	-0.00359274	-0.14503	0.194423	-0.0548891	-0.238355	0.0292823
0.224006	0.0743928	-0.146283	-0.500595	-0.168119	-0.0618736	-0.0479458	0.113645	0.189832	-0.0106358	0.0869617	0.361181	-0.0782482	0.25565	0.0968494	0.123823	-0.115121	0.144551	0.0768451	0.0328164	-0.0140104	-0.0754084	-0.0112646	0.0110855	-0.16081	-0.0367249	0.0522056	-0.293267	0.10749	0.285863	-0.0682494	0.186111	-0.12528	-0.110612	-0.0967567	-0.268238	0.0698164	0.100451	-0.10916	-0.0365742	0.13086	0.183062	0.0553443	0.090175	0.00737853	0.233754	0.143984	-0.0787364	-0.341451	-0.245277
0.258315	-0.286852	0.366112	-0.432257	-0.09285	-0.0488066	-0.0274668	-0.0880405	-0.253192	-0.150629	0.0749935	0.234134	0.0748292	-0.184343	-0.178823	0.268039	0.221069	-0.41257	0.180397	-0.255386	0.267077	0.234442	-0.336235	-0.222879	0.17565	-0.0348873	-0.131187	-0.213896	0.199906	-0.564273	0.107319	0.0714805	-0.116628	-0.143745	0.0679253	0.104023	0.0897262	0.195482	0.183431	-0.0657503	0.138463	0.236377	0.325216	0.0910656	0.0208242	-0.113899	-0.00281162	-0.0798278	-0.0610881	-0.199401
0.318983	0.174738	0.286636	-0.465158	0.0326445	0.137139	0.189778	-0.144494	0.133651	0.200121	-0.131605	0.0593513	0.0405761	-0.23337	0.0846219	-0.23017	0.0685805	-0.029261	0.25975	-0.304827	-0.0929747	-0.0884459	-0.31535	-0.206766	-0.116559	-0.0528297	-0.110104	-0.0445811	-0.0757432	-0.326898	-0.022148	0.120754	-0.144921	-0.170544	0.0552689	-0.17745	-0.0868741	-0.0295598	0.228992	-0.163818	0.145668	0.0458247	0.161161	-0.298282	0.0166844	-0.15169	-0.0795131	-0.0826621	0.0556297	-0.223713
-0.515523	-0.353947	0.326588	1.22391	0.362385	-0.116729	-0.116277	0.116198	0.241654	-0.108967	-0.100889	-0.131246	-0.0429341	0.231357	-0.156129	0.104132	-0.145353	0.198987	0.0169065	0.0551034	-0.100076	-0.066963	-0.102094	-0.153975	-0.170704	0.307894	-0.126364	0.151193	-0.233764	-0.359211	0.106104	-0.168444	0.0541504	-0.0401726	0.206748	0.240259	0.104061	1.95911e-05	-0.16546	-0.182341	-0.363199	-0.145664	0.0241915	-0.0946623	0.0429819	0.128427	-0.168023	0.357166	0.290719	-0.257183
-0.366116	0.0331399	0.348795	-0.53802	-0.132071	0.137181	0.177818	0.0732877	-0.220424	0.246372	0.119052	-0.250564	-0.0479479	0.229404	-0.193931	0.083196	0.0358832	0.0537614	0.068327	-0.325094	0.0180773	-0.132764	-0.0303021	0.0997329	-0.025704	-0.0262705	0.0620501	0.308036	-0.0345938	-0.587541	0.0289966	0.23082	-0.125701	-0.108088	0.0833216	0.0591322	0.0092935	0.0177172	0.192109	0.145016	0.136227	-0.278142	0.148431	-0.105345	0.0548096	-0.000207037	-0.16104	-0.0747347	-0.268816	0.110195
-0.117801	-0.251631	-0.173986	0.585487	0.0212067	-0.313247	-0.0518535	-0.10915	0.161894	-0.0571044	0.115886	0.226772	0.0815893	0.103624	0.195589	-0.215084	-0.36366	-0.412751	-0.0647339	-0.0440852	0.02117	-0.0579206	-0.00603998	-0.0301945	-0.144955	0.00751865	0.104712	0.229452	-0.0844718	-0.348808	0.15046	-0.0248546	0.0346852	0.209564	-0.166032	0.0770072	-0.0441394	-0.308312	-0.160788	-0.168413	0.103981	0.0935599	0.014516	-0.137377	0.0114641	0.0550285	-0.222667	-0.0728217	0.43959	0.109673
-0.396665	0.261004	-0.0353301	1.60193	0.0726446	0.253952	0.145935	0.0236864	0.147786	-0.168134	0.115519	0.349978	0.0409539	0.281466	0.219909	0.152135	0.221399	0.161645	0.29162	0.435066	-0.0693731	0.244294	0.116932	0.247993	0.154487	-0.0450565	-0.144428	0.180098	-0.0311832	1.27923	0.127601	-0.15286	0.184199	-0.0712666	-0.161283	0.323702	-0.01021	0.146904	-0.0410812	-0.242319	0.137116	0.259862	0.16194	-0.104066	0.106235	0.0528903	-0.0804992	0.0435336	0.369083	0.154712
0.143001	0.0865843	-0.0881011	-0.498506	-0.112294	0.13213	-0.0737788	-0.112999	0.174708	0.148837	-0.113515	-0.0411728	-0.0884368	-0.257975	0.219645	-0.0221122	-0.250486	0.13755	-0.0893409	-0.393257	-0.150731	0.272386	-0.364489	-0.0315996	-0.113021	0.000534202	-0.109784	0.275999	0.495473	-0.320648	-0.0961526	0.186493	-0.145863	-0.112719	0.178231	0.117179	-0.063091	0.0968601	0.204355	-0.0186173	0.0800192	0.0756842	0.104017	-0.154505	0.0471021	-0.0521883	-0.0675652	-0.0572144	0.0468995	0.119365
-0.138428	-0.158323	0.304683	0.120681	-0.132624	-0.255406	-0.0700403	0.0894952	0.111303	-0.16368	-0.159951	-0.0375421	-0.0573643	-0.203739	0.0473826	-0.164157	-0.162043	0.0936594	-0.0402507	-0.33888	-0.126371	-0.0861622	-0.23121	0.166968	-0.157368	0.316659	-0.102155	-0.164052	-0.0722789	-0.186538	-0.0443782	-0.0168763	0.127591	-0.133133	0.0556861	-0.0908518	-0.0383026	-0.183172	-0.14499	-0.127999	0.0982468	-0.169496	-0.288389	-0.313564	0.108051	-0.194503	0.114738	-0.0917203	-0.164581	0.0783781
0.288822	0.200109	0.240713	1.56121	0.280853	0.133884	-0.0385544	0.135173	0.0848264	0.117709	-0.164983	-0.191922	0.302682	0.154185	0.00602245	0.195118	0.269304	0.173997	0.107235	0.409387	0.0362102	0.181536	0.379354	0.210389	-0.0944036	-0.0208354	0.0974006	0.2499	0.191724	1.41808	0.145474	-0.00985866	0.102658	0.285866	-0.133397	0.278798	0.0759322	0.311724	0.229955	0.148283	0.0339333	0.164179	0.168286	-0.366217	-0.231412	0.198829	-0.104025	0.222065	-0.144551	0.167013
-0.287198	0.149805	-0.191095	0.164071	0.233997	0.363755	0.00676248	0.000571643	0.163915	0.237512	-0.0823317	-0.253591	0.0662492	0.221935	0.235529	-0.211509	0.185691	0.165457	0.229492	-0.326213	0.292561	0.331026	-0.0292736	0.183645	-0.0202009	-0.254377	-0.103532	-0.120921	0.348429	-0.626834	-0.0859433	-0.079861	-0.152439	0.348548	0.0261473	0.0474932	-0.0846038	0.0166519	0.22329	0.212534	0.0120118	0.279989	0.144836	0.0733771	0.039022	0.0646693	-0.268723	-0.0765718	-0.158817	0.126117
0.222686	0.0533874	-0.190871	-0.500274	0.0074471	0.391779	-0.10489	-0.104274	-0.191828	0.13201	0.0919645	0.128521	0.0156222	-0.218987	0.0507269	-0.271376	0.155026	0.146397	-0.0305281	-0.0985346	-0.136293	0.234038	0.108436	-0.2229	0.0323087	-0.00575222	-0.134639	0.180041	0.30017	-0.332782	-0.334083	-0.169314	0.190086	-0.0886992	-0.126251	-0.0065763	0.00137227	-0.23015	-0.152381	-0.0776763	0.117858	0.0468292	0.250583	-0.125862	-0.204381	-0.0366629	0.167415	-0.0751017	-0.145915	-0.276061
-0.47543	-0.183968	-0.0331699	-0.474691	-0.00131252	-0.0697773	-0.115012	-0.107158	0.148365	0.190113	0.108684	0.273553	-0.044617	0.277072	-0.234474	-0.161501	0.220422	-0.0417173	-0.101422	0.603652	-0.127569	-0.0913497	-0.137201	0.289502	-0.179922	0.0563343	0.0914574	-0.174888	-0.0533659	0.490571	0.0383411	-0.134051	0.162168	-0.0700771	0.0858135	-0.448098	0.0867589	0.151409	-0.155555	-0.0233466	0.145668	-0.0720008	-0.300537	0.0774658	0.0205172	0.0376037	0.200837	-0.0735275	-0.107785	-0.262327
-0.168585	-0.250928	-0.215532	0.0177019	-0.091067	-0.140245	-0.103306	0.11728	0.231117	-0.157517	0.0614328	-0.0934303	0.0951976	-0.131915	0.0157243	0.14275	-0.314599	0.0123303	-0.162526	-0.283924	-0.0602421	-0.0700018	-0.013127	-0.0133003	0.0442138	-0.0332353	-0.133698	0.182815	-0.301576	-0.547612	0.155688	-0.225573	-0.101369	-0.187824	0.0322898	-0.179616	-0.0618449	0.219974	0.185399	0.296803	0.0725304	0.0996098	0.0601607	-0.330127	0.0968354	0.224007	-0.0694724	0.0626005	0.185011	0.12059
0.17127	0.231282	-0.0197844	1.38058	0.246419	0.363268	0.194787	0.0905449	0.226199	0.145118	0.102887	0.326234	0.112716	-0.197929	0.245652	0.19937	0.172315	0.21765	0.21159	-0.20999	-0.0828684	0.108992	-0.00694871	-0.224144	0.0811833	-0.0281543	-0.156562	0.233011	0.170113	-0.223799	0.20554	0.237682	0.0592516	0.12912	0.229482	0.233312	0.0819327	0.306365	0.161147	0.198121	0.118001	0.159582	0.334773	-0.0662941	0.051379	0.173681	0.114033	0.243173	0.204579	0.177459
-0.125137	-0.178763	-0.0389052	-0.568679	0.00246377	0.0803125	-0.0656184	0.150582	-0.291838	0.138365	0.0865906	0.14945	0.0535075	-0.0946256	-0.190449	-0.177257	0.171377	-0.273257	-0.00680026	0.591242	-0.0959653	-0.115397	0.354234	-0.0629384	0.0658285	0.289793	0.123035	-0.107123	-0.308342	-0.368092	0.130186	0.0498348	-0.119159	-0.160999	-0.133533	0.228901	0.0916406	0.0168634	-0.0315829	-0.197476	0.097514	-0.116349	-0.324505	0.0413095	-0.222085	0.0405417	0.180823	-0.0780082	-0.0281347	-0.202705
0.181378	-0.146061	0.458583	-0.420256	-0.0830406	-0.143613	0.230289	-0.122312	-0.168218	-0.159145	-0.144602	0.202587	-0.291347	-0.106975	0.0370292	-0.151194	-0.36507	-0.00443786	0.196659	-0.319689	-0.121742	0.280407	-0.303491	-0.15995	0.0283342	-0.0166948	-0.10694	-0.195106	0.177913	-0.62811	-0.103418	-0.0202487	0.0328775	0.166536	-0.0854323	0.174481	-0.0302958	-0.285279	-0.0373058	-0.0733921	0.0487555	0.115855	0.1119	0.113624	-0.166509	-0.133586	-0.288317	-0.0614543	-0.0933508	0.0889278
-0.407166	-0.247037	0.241153	1.61359	-0.152835	0.096112	-0.0583845	0.11755	-0.183383	-0.322672	0.128022	-0.153803	0.317494	0.226607	0.0540841	0.271888	-0.35088	0.145481	0.11644	0.461066	-0.0911875	-0.0909889	-0.0454962	-0.0322612	0.0245769	0.0397765	-0.158616	0.240226	0.0494351	1.75787	-0.057592	-0.0202788	0.111994	0.121936	0.155355	0.282897	-0.0342287	0.330994	0.204505	0.190184	0.119182	-0.0732898	-0.114695	0.146687	0.114222	0.222439	-0.0138425	0.256271	0.0448582	0.144778
0.0528406	-0.318429	-0.220181	-0.481946	0.0387841	-0.0863782	0.207948	0.0983279	0.254529	-0.0300189	-0.0397953	-0.195015	0.0704824	-0.213169	0.0215934	0.092589	-0.183292	0.0410975	-0.180128	0.0433043	0.0681272	-0.0671148	-0.255597	0.0307807	-0.137154	0.357371	0.162121	0.189331	-0.109528	-0.389138	0.161997	-0.18735	0.0285117	-0.165747	0.0572967	0.167509	0.115645	-0.291063	-0.0267253	-0.0483405	0.0992281	-0.111915	0.077397	0.138193	0.0140674	-0.102351	0.19059	-0.0586692	-0.187863	-0.329394
-0.566084	0.199123	-0.0267505	1.62076	0.137234	0.164237	0.154441	0.127699	0.0475653	-0.174348	0.128276	-0.209226	0.346396	0.15656	0.117355	0.0517425	-0.161066	0.107583	0.220587	0.302853	0.0206792	-0.0544206	0.208582	0.111092	0.0424051	0.0695185	0.179205	0.281461	0.321589	-0.0882463	0.121383	-0.161063	0.054853	0.395788	0.078359	-0.0487727	0.0391754	-0.0655061	0.248001	-0.034582	-0.0187106	-0.0910477	0.109798	0.127728	0.0842523	-0.115321	0.0188666	0.242746	0.0776884	0.152071
0.141756	-0.00330289	0.151692	0.977653	0.212868	-0.0945607	0.128927	-0.141622	-0.0602396	-0.00335799	0.00602674	0.162252	-0.359387	-0.279388	0.192829	0.0246493	0.138288	-0.0539199	-0.0289858	-0.445204	0.0778452	-0.099176	-0.0826908	0.114062	0.0114681	-0.0255506	-0.18949	-0.174311	-0.241513	1.96572	-0.301624	-0.156797	0.184825	-0.101406	-0.165921	-0.0610285	-0.00739341	0.326105	0.189517	-0.170026	0.0692068	-0.13304	-0.0335067	0.0956551	0.00387208	-0.0856306	0.127159	0.0427205	0.244404	0.00749689
0.221203	0.0395051	0.330637	-0.498964	-0.0142147	-0.0773484	-0.0919385	-0.0799792	0.256573	-0.0239967	-0.196126	-0.23154	0.316614	0.187161	-0.181002	0.0767442	0.105413	-0.402533	-0.025209	0.154898	0.340374	-0.0514316	-0.297077	0.0669449	0.0526841	0.0626581	-0.208753	-0.179866	0.182887	-0.321037	0.11324	-0.126337	-0.121543	0.490244	-0.0739623	0.138273	-0.0925074	0.000948675	-0.115371	-0.205134	-0.426271	-0.0861185	0.139323	0.127039	0.0595969	-0.110561	0.185325	-0.0620447	0.241674	-0.245962
-0.405922	0.181562	-0.029199	0.533674	0.0294924	0.168669	-0.0895046	0.116407	-0.166547	-0.146758	0.102562	-0.299782	0.0554074	0.345641	-0.237899	0.0467236	0.220566	0.111344	-0.0678591	0.202069	-0.0070385	0.278087	0.0909762	0.00760853	0.0621284	-0.0414595	0.0575456	-0.210412	-0.0315938	-0.333643	-0.255526	-0.157526	0.0298011	-0.0275176	-0.143105	-0.436992	-0.0605749	0.139452	-0.0251389	-0.0677002	0.127556	-0.147143	-0.149008	-0.230461	0.0353215	-0.00367645	0.19573	0.284174	-0.148932	0.12849
-0.150826	0.00176828	-0.0548995	-0.380513	0.22771	-0.1162	-0.112727	0.107456	0.20747	0.108998	0.0851672	-0.239188	0.280469	0.184635	0.120104	0.0935757	-0.292862	-0.0647561	-0.136847	-0.335421	0.0538131	-0.079416	0.0779451	0.129753	0.0544762	0.10729	-0.172862	-0.15119	-0.00467898	-0.158842	0.164164	-0.145672	0.13294	-0.164203	-0.182796	0.00387655	0.0692104	0.0606545	-0.184223	-0.0361215	0.0694624	-0.138349	-0.348408	0.134193	0.0223535	-0.172725	0.333353	0.0512232	0.313871	-0.187065
0.265174	-0.296284	-0.156509	0.896912	0.0788941	-0.400814	-0.0840788	0.0815302	0.225864	-0.0740314	0.109238	-0.387115	-0.0534776	0.259166	0.167361	0.180228	-0.303854	0.0485188	-0.444521	0.435246	-0.120139	-0.0291322	0.0226657	-0.0374519	-0.0543335	0.299501	0.0965494	0.184428	-0.0956014	0.345648	0.128951	-0.16705	0.0565523	0.204582	-0.139678	-0.411085	-0.00347733	-0.240439	-0.131486	-0.114318	0.105651	-0.277384	-0.278249	0.0844062	0.0498966	-0.152081	0.129044	0.273813	-0.286025	-0.222321
0.164525	-0.329473	-0.176828	-0.503963	-0.16283	-0.100072	0.221393	0.107136	-0.0825315	-0.0314787	-0.143306	0.069099	0.0764717	-0.199948	0.0725529	-0.219801	-0.399091	0.154058	0.164049	0.254323	0.231076	0.316729	0.100982	-0.248417	-0.185166	-0.0380059	0.138264	-0.0355995	-0.369824	-0.645186	0.108307	-0.208705	-0.0886838	-0.162017	-0.131325	0.0613837	-0.0222592	-0.270004	-0.194955	-0.0449487	0.122872	-0.0835559	0.027716	0.121877	0.0582931	-0.184786	-0.0683459	-0.0637629	0.233323	0.0984503
0.277371	0.22427	0.155799	-0.248507	-0.111179	-0.0722069	-0.0860034	0.158234	-0.106628	-0.0609964	-0.11914	0.172902	0.112611	-0.0197792	0.235106	0.0326621	0.322784	0.085477	-0.163154	0.504751	-0.0505236	-0.07801	0.246637	0.320351	0.0457064	-0.0299046	-0.146996	-0.169352	0.210846	-0.275871	0.119608	0.020012	-0.172468	0.310975	0.164905	-0.149424	-0.0100419	0.358914	0.276332	0.157798	0.036306	0.210247	0.197581	-0.0534284	0.127852	-0.0581229	0.0082522	-0.0652799	0.149915	0.0770318
0.327299	-0.197348	-0.143528	1.74543	0.00859822	-0.340066	-0.0664146	0.10866	0.22181	-0.124417	0.00746093	0.285001	-0.213959	-0.148825	-0.199317	0.130735	-0.286672	0.0361966	-0.338827	0.538807	0.213104	0.188585	0.311012	0.33051	-0.114362	0.291168	-0.136838	0.175929	-0.11015	2.11305	0.089112	-0.136852	-0.107553	-0.062616	-0.193086	0.112868	-0.0272364	0.0104889	0.230783	-0.0338286	0.0960176	-0.10079	-0.32437	0.109936	0.0494551	-0.0936267	-0.0894892	0.244207	0.202177	-0.196358
-0.346085	0.0375997	0.371391	-0.556837	-0.153566	0.11578	-0.0656998	-0.104612	-0.0555363	0.198409	0.112755	-0.0923766	0.0601344	-0.0795725	0.207551	0.0222943	-0.253741	0.125287	0.13805	0.111787	-0.119798	-0.0402423	0.0416955	-0.241467	0.170212	-0.000845088	0.139531	-0.0880445	-0.144922	-0.523439	0.00304979	0.0279061	0.0475377	-0.0681372	-0.162115	0.196856	0.0536304	-0.087121	-0.00261208	0.00304029	0.148045	-0.109625	0.323265	-0.086859	0.0224315	0.0208828	0.173452	-0.0637928	-0.147443	0.0878816
-0.113208	0.0611068	-0.0200559	-0.532479	-0.0576689	0.115604	-0.0426593	0.1114	-0.335606	0.169481	0.133516	-0.344617	0.0139144	0.238557	0.0559256	0.229917	-0.312082	0.10558	0.0159754	0.562597	-0.11145	-0.0856732	-0.191999	0.16529	-0.126806	-0.0446788	0.0314912	0.248109	0.00979907	-0.608203	0.134658	-0.208277	0.0831612	0.176611	0.146829	0.11333	-0.0742084	-0.367187	-0.165246	-0.061528	-0.157759	-0.260085	0.159058	-0.109746	0.0673181	-0.0215264	-0.39401	-0.0827519	-0.106801	0.0988279
-0.142009	0.174078	-0.0487919	-0.236683	0.0810595	-0.163725	0.180773	-0.129475	0.00511169	0.134069	0.00877006	0.113098	-0.132689	-0.12103	0.183133	0.142885	-0.343289	0.0648113	0.105109	-0.39624	-0.131354	0.300304	-0.324744	-0.194324	-0.03399	-0.165101	0.0697133	-0.0976466	0.239347	-0.651324	-0.13849	0.00315248	-0.154713	-0.127895	-0.0934633	-0.101408	-0.035981	0.00330753	-0.0441518	0.218344	0.123752	0.203455	0.0427618	-0.283348	0.0777955	-0.166804	0.101786	-0.07907	0.0270355	0.115064
0.166681	0.227162	-0.177838	-0.490815	-0.128922	0.38434	0.104603	0.086194	-0.155792	0.10801	0.0960861	0.128792	-0.000314161	-0.173199	0.0126971	-0.0099453	0.224718	-0.0230922	-0.113321	0.197814	-0.0639153	-0.0127765	-0.262255	-0.239917	-0.0759334	-0.144519	0.0771272	-0.256947	-0.1141	-0.576955	-0.325743	0.273608	-0.172214	0.35307	-0.150568	-0.124136	-0.00889451	-0.23004	0.192395	-0.0500469	0.131973	0.12109	0.27388	-0.150537	0.019192	-0.13006	-0.28327	-0.0832496	-0.279332	0.0969084
0.0329785	-0.174986	-0.0862566	-0.563998	-0.134145	0.100189	-0.126546	-0.14175	-0.0900722	-0.135715	0.121599	0.211059	-0.0916391	-0.251835	-0.192431	-0.148043	0.134668	-0.012477	-0.00037343	-0.429745	-0.0261553	0.308936	-0.0727859	-0.0919154	0.203387	-0.0245129	0.133332	-0.3037	0.030967	-0.599376	-0.307741	0.0809316	0.0813471	-0.0642712	-0.140541	0.138165	-0.0891824	-0.270551	-0.144732	-0.0898657	-0.0400274	0.0791432	-0.176096	-0.0819778	0.0132962	-0.152613	-0.178008	-0.0823346	0.0543009	0.0582148
-0.361182	-0.34884	-0.0588337	-0.50375	-0.136124	-0.0905861	-0.122082	-0.13203	-0.00911258	-0.340647	0.0838417	0.161188	0.282923	0.240642	-0.20581	-0.2278	0.114166	-0.328519	-0.158233	-0.345339	-0.114782	-0.0538336	-0.268628	-0.0380431	-0.0452144	0.333632	0.0068911	0.180534	-0.0190933	0.422183	-0.155348	-0.0289649	0.0173516	-0.135577	0.0371363	-0.0428229	0.0431895	0.0612801	0.0174864	0.275029	0.0151178	-0.0804931	0.0915584	0.104456	-0.0578889	-0.127174	-0.0649664	0.311954	-0.195932	-0.251945
0.203147	-0.132579	-0.0516685	-0.434293	0.179998	-0.360238	-0.0985856	0.133254	0.123226	-0.0896854	-0.0201474	-0.102574	-0.0466658	-0.204283	0.0695862	0.183983	-0.135953	0.0377101	-0.138255	-0.396989	0.184175	0.0711454	0.154629	-0.260087	0.0989761	-0.0212101	-0.101952	-0.113231	-0.290985	-0.453372	-0.0670523	0.133537	-0.121487	-0.129897	0.232316	0.0942452	0.141673	0.285238	-0.0668422	0.142877	0.0617884	0.322943	-0.0879737	0.127907	0.0896426	-0.173483	0.130387	-0.078028	-0.250656	-0.158666
0.238902	0.0380332	0.263399	-0.512572	-0.100661	-0.0784786	-0.0104012	0.123057	-0.246737	0.135464	-0.150271	-0.0971349	-0.0763261	-0.150892	0.0925686	-0.181241	0.188351	0.0613527	-0.0123004	0.0613305	-0.148839	-0.128196	0.0844667	0.0875242	-0.138326	-0.03325	-0.0774101	-0.100474	0.19593	-0.502902	-0.0379447	-0.00422196	-0.151258	-0.0922255	-0.143389	0.0554651	-0.0554097	-0.327328	-0.181685	-0.0374796	0.0897386	0.213352	-0.18251	-0.109728	0.0374902	-0.082785	-0.293455	-0.0783212	-0.111722	-0.225525
-0.117965	0.287304	0.0110787	0.0346627	0.317729	0.408732	-0.0281855	0.00936386	-0.282502	0.116099	0.076577	0.291684	0.383069	-0.128547	-0.111636	-0.237266	0.233549	0.0371113	0.268702	0.172366	-0.0734334	0.0188213	0.144703	0.336246	-0.0425987	-0.0148535	0.134819	0.239584	0.322924	1.46887	-0.070859	0.294629	0.0408039	-0.0545871	0.0193325	-0.0794917	0.0448463	0.0532614	0.226845	-0.011395	0.0697451	-0.286735	0.112132	-0.0533575	0.112954	0.155808	0.26249	-0.0673548	-0.1983	0.162762
-0.0954342	0.0752789	-0.039492	1.71299	-0.0582169	-0.340929	-0.0705161	0.102856	0.275564	0.125646	0.117433	-0.194097	0.0733517	0.232556	0.228671	0.318215	-0.235781	0.158253	-0.369787	0.208797	-0.0826407	0.0054918	0.260766	0.223364	0.279609	0.0346095	0.0868487	0.151925	-0.374305	2.00408	0.16057	0.204514	0.0389711	-0.0406563	0.0784421	0.325831	0.0873555	0.10141	-0.152475	-0.113527	0.106444	-0.130524	0.106358	0.144656	0.058926	0.200867	0.328056	0.244054	0.421295	0.122283
-0.145897	0.266118	-0.0389832	-0.415273	-0.10866	-0.0728731	0.0234761	0.0141076	-0.136174	0.0062412	0.0968048	-0.143192	-0.00984248	0.285993	-0.194644	0.0524131	0.258082	0.0328436	-0.0873541	0.174475	0.00517208	-0.0476551	-0.354242	0.20863	-0.108598	-0.182142	-0.118407	-0.309923	0.0225095	-0.599498	-0.342526	-0.193918	0.0592644	0.399795	-0.145938	0.102253	-0.0240421	0.272129	-0.142531	-0.0407983	0.141746	-0.156069	0.0112713	-0.288542	0.0205529	-0.165134	-0.0333664	0.0494501	-0.0919405	0.00170677
0.331734	0.128437	0.0939066	1.53421	0.271122	0.256685	0.140966	0.0919791	0.208889	0.105572	0.133421	0.297388	0.0953374	0.120721	0.12139	0.166591	0.15247	0.179907	-0.0795463	0.519789	-0.0777219	-0.0375481	0.14533	0.0993935	0.264681	-0.00713165	0.159998	-0.325901	0.261824	1.83815	0.138757	0.0739429	0.16806	0.277278	0.169467	0.339707	0.0860034	0.373272	-0.0826196	0.157638	-0.419724	0.146659	0.136587	0.0899417	0.0598741	0.159074	0.135743	0.243355	0.276196	0.140781
-0.239841	0.239745	-0.0856712	-0.54463	-0.141272	0.231392	-0.0719574	-0.08974	-0.225232	0.162491	-0.167438	-0.285131	-0.117506	0.238072	0.0766415	0.117814	0.173308	0.163334	-0.145631	-0.304632	-0.115588	-0.12959	0.165407	0.0715876	-0.139948	-0.0694742	0.0625696	-0.302882	0.352044	-0.567606	0.119712	0.235945	-0.189713	0.345998	-0.171561	0.0967271	-0.0923504	-0.0246994	0.191086	-0.240884	-0.597132	0.149611	0.10371	-0.258049	0.0378151	0.0467062	0.0189812	-0.0638248	0.00881607	0.0950675
-0.448029	-0.389743	-0.170809	1.63114	-0.135945	0.273149	0.010637	0.0781766	0.262156	-0.267795	0.100324	-0.227765	0.242893	0.23043	-0.227367	0.278289	0.190352	0.114538	0.0833763	0.544407	0.226447	-0.0761233	0.213843	-0.201552	0.061693	0.0540491	0.12574	0.239841	-0.232706	1.9585	0.142909	-0.131702	-0.0985976	-0.103827	0.0736188	0.347072	0.0883002	0.146281	-0.00257247	-0.0252	0.116974	-0.0760796	0.130233	0.106653	0.0450153	0.229316	0.377395	0.239514	0.369676	0.145888
-0.348153	0.158122	0.116376	1.63458	0.298368	-0.0333591	0.134946	0.00778019	0.175032	-0.219686	-0.0582794	0.318289	0.291365	0.23313	-0.209208	0.374151	0.20626	0.180567	0.211595	0.569925	0.227922	0.224746	0.331638	0.230529	-0.189822	0.0195158	0.101546	0.274735	-0.256817	1.27206	0.116307	-0.00109853	0.0561671	-0.0694247	0.060846	0.251235	0.0993232	0.192959	-0.0683576	0.00161097	0.0367773	-0.143404	-0.0668093	0.0818571	0.0489353	0.151774	0.342684	0.235174	-0.096052	0.0431321
0.272283	-0.132361	0.287018	-0.416468	-0.145546	-0.088366	0.223834	0.0855405	0.132874	-0.211758	-0.158021	-0.235631	-0.0961815	0.0900184	-0.211874	-0.133297	-0.0862182	-0.0276847	-0.0682462	-0.0923343	-0.112783	-0.0881673	0.0511351	-0.0658866	-0.170005	0.0902601	0.0362039	-0.364686	-0.0886609	-0.607594	0.104631	-0.0621485	0.0757981	-0.122376	0.291991	0.143158	-0.0852198	0.214143	-0.076649	-0.0266031	-0.410007	-0.14203	-0.225242	0.12356	-0.00323938	-0.192058	-0.0375246	-0.0833313	-0.151125	0.037821
0.364851	0.246241	0.237198	0.0454739	-0.12507	-0.119791	0.239933	-0.0901575	0.185655	0.0920857	0.131416	-0.00528313	-0.0711043	-0.197562	0.068022	-0.265663	-0.142346	-0.0228609	-0.0425873	-0.197136	-0.0128506	-0.0625915	-0.0878364	-0.193217	0.0542611	0.333098	0.160444	-0.209813	0.273557	-0.314777	0.137811	-0.185786	0.047401	-0.138407	0.0553771	0.0912311	-0.0741657	0.0628052	-0.0566483	0.00136529	0.128239	0.0577731	-0.184493	0.161211	0.0671014	0.0560016	0.416188	-0.0790739	0.337664	0.115471
0.155676	-0.282014	0.36521	-0.488377	-0.134838	0.137204	-0.132512	0.0953386	-0.216625	0.129007	0.101993	-0.231173	0.0279494	0.184722	-0.248116	-0.104415	0.0911649	-0.328143	-0.352993	-0.281611	-0.0553024	-0.0761819	-0.288323	-0.035197	-0.0210752	0.0702072	-0.148518	-0.227171	0.158974	-0.26833	-0.0296255	0.0343191	0.0934357	-0.134917	-0.159594	-0.0910992	0.0497963	0.164391	-0.0709189	-0.195942	0.114495	-0.122794	-0.395555	0.0793107	0.0068557	-0.129568	-0.313862	-0.0727835	0.18534	0.0616537
0.157803	0.00601397	0.14143	-0.263994	-0.0213639	-0.12111	0.188024	0.0797504	-0.278102	-0.0172422	0.114312	0.105007	0.0482686	-0.0947129	0.280439	0.0806071	-0.301969	0.065743	0.284954	-0.270439	-6.56187e-05	-0.0935262	-0.286734	-0.225026	0.0276072	-0.0848824	-0.0896399	-0.102476	-0.145131	1.5584	-0.0853893	0.0131633	-0.12812	-0.121862	0.0161893	-0.131141	0.0555449	-0.277791	-0.126326	0.201258	0.102476	0.152202	0.37212	-0.313798	0.0616901	0.0218274	0.0347476	-0.0801169	-0.2188	0.0828322
-0.38238	0.0705661	-0.0919517	-0.0229433	-0.122387	0.400514	-0.0736111	-0.0312803	0.101855	-0.0414587	0.134331	-0.291352	-0.0526467	-0.142451	-0.202072	0.0631727	0.169105	0.139258	-0.286019	0.250318	-0.107334	0.328488	-0.273015	-0.260152	-0.130031	0.249594	0.084581	0.30071	0.156444	-0.580823	0.125002	0.0414531	-0.0798251	-0.0559069	0.180831	0.0833609	-0.0830501	-0.312514	-0.00958705	-0.00795931	0.0948318	-0.300394	0.113908	0.14297	0.0610559	0.0479359	-0.164777	0.239856	0.0254847	-0.266094
0.276018	0.330948	0.271061	-0.401703	-0.136576	0.0572209	0.168908	-0.107263	0.178834	0.19439	-0.0463669	0.343413	-0.0984621	-0.0870486	0.00444091	0.103872	-0.0738905	0.158998	0.221659	-0.33683	0.00243985	-0.076273	-0.0525556	0.260347	-0.00385728	-0.00517666	0.0693911	0.308643	0.127075	-0.318391	0.160088	0.104357	-0.17929	0.266787	0.0730826	0.0648376	-0.0822847	-0.0464917	0.187309	0.186044	0.0752899	0.13634	0.195836	-0.224551	0.0533631	-0.0988217	0.0160472	-0.0783669	-0.234217	0.151788
0.238136	0.206716	-0.00974972	1.60357	0.341994	0.237033	-0.0682156	0.101446	0.214466	0.102325	-0.0202756	0.259537	0.381183	-0.094675	-0.175419	0.285019	0.155088	0.185844	0.233176	-0.309369	-0.0587265	-0.0473009	0.107822	0.292548	0.0500548	0.231724	0.140666	0.250807	-0.0324354	2.02423	0.161029	-0.139955	-0.141417	0.130967	0.212231	0.220256	0.00105652	-0.3217	0.205103	-0.175542	0.0693791	0.0292861	-0.176963	-0.0335669	-0.100291	0.211239	-0.0122448	0.233166	0.358353	0.140817
-0.437367	-0.145625	-0.0445298	-0.401929	-0.0246069	-0.447916	-0.124461	0.138865	0.170468	-0.0720312	-0.0272233	-0.257402	-0.0714577	-0.179703	0.0980985	-0.175888	-0.296581	-0.00887906	-0.0684092	-0.232402	-0.115289	-0.10641	-0.0623171	0.19058	0.0422925	0.280781	-0.125156	-0.0783563	-0.270272	-0.401071	0.0855661	-0.0195135	0.000847037	-0.142432	-0.074343	0.195501	0.106254	-0.0493012	-0.189375	-0.207147	0.112989	-0.166047	0.140423	0.123864	0.0444286	-0.105145	0.150857	-0.077045	-0.222731	-0.166558
0.178642	-0.252137	0.197703	-0.469782	-0.148841	-0.0693589	-0.112977	0.133708	-0.20969	0.163718	0.0268266	-0.137571	0.341757	0.175351	-0.15528	0.0186094	-0.31975	0.104842	-0.0859336	-0.20402	-0.0937592	-0.0273491	-0.0676846	-0.0304435	-0.129806	-0.0484589	-0.113572	0.238773	-0.182802	0.475148	-0.291692	-0.148372	-0.0476603	-0.107514	0.00629635	-0.252047	-0.0788328	-0.00589034	-0.18747	0.190428	0.118156	-0.23387	-0.0409382	0.0980922	0.0308048	0.237272	-0.159073	-0.0789294	-0.148088	-0.292311
0.256797	0.0526767	-0.0485018	-0.455379	-0.151461	-0.082286	-0.140047	-0.138798	-0.0150605	-0.197842	0.135026	0.185225	-0.0649483	0.324985	0.00220046	0.0636868	0.251977	0.168658	0.0474901	-0.369516	-0.121148	-0.115368	0.191701	-0.320902	-0.0541974	-0.06303	-0.144156	0.306765	0.432971	-0.365185	-0.280933	-0.129501	0.00860796	-0.0202345	0.210862	-0.0565969	-0.0050311	0.108087	0.266078	-0.0516067	-0.527646	-0.114161	0.0348163	-0.113473	0.0043121	-0.0836597	0.22957	-0.0625987	0.0311654	0.0543336
-0.0177645	0.0666743	-0.16406	-0.432724	-0.121968	0.156724	0.0639707	0.142984	-0.27071	-0.0818747	0.111909	-0.172075	-0.0434086	0.321382	0.122485	-0.207426	-0.270052	0.0194148	0.103461	-0.246995	0.0355519	-0.0713668	0.0383856	-0.248796	-0.000666191	0.0036703	0.112359	0.218169	-0.349657	-0.383022	-0.0902619	0.0352336	0.0695403	-0.119255	-0.120934	0.112625	0.116183	-0.0521685	-0.0342872	0.135191	0.0939262	-0.114131	-0.137895	0.121762	0.128734	0.0537121	-0.0870113	-0.0900259	-0.140595	-0.180889
-0.374988	-0.0685327	-0.169558	-0.0238007	-0.108071	-0.118447	-0.0779575	0.072666	-0.180633	0.0144354	0.127182	-0.318503	-0.0277164	0.228369	-0.213578	0.0521869	-0.258965	-0.0400075	-0.403898	0.484023	-0.0738293	-0.0784467	0.342114	0.112506	0.0218286	-0.0114812	0.0594182	-0.157425	-0.343597	-0.39342	-0.0848134	-0.201688	0.0976734	-0.0511457	0.234194	-0.389995	0.00642297	-0.211152	-0.149652	-0.0272519	0.114816	-0.0801972	-0.345544	0.0878544	-0.263149	0.265377	0.184043	0.0569772	-0.100876	0.112989
0.155996	0.106843	-0.0308072	-0.481344	0.0212821	-0.0671958	0.221792	-0.0946433	0.0002192	0.163401	0.115036	0.178606	0.0443094	-0.238751	0.281413	-0.291498	-0.241034	-0.47201	-0.340291	0.0909152	0.0211159	-0.0678883	-0.0474832	-0.31888	0.15468	-0.0846404	-0.161726	0.275192	0.422183	-0.0483243	-0.0738157	0.157157	-0.112623	-0.0949375	-0.0408464	-0.299456	-0.0318717	-0.0218646	0.152468	-0.0432465	0.100739	0.0432887	-0.326701	0.11407	0.0260913	0.0290201	0.1345	-0.0845714	-0.232579	0.0990678
-0.19638	0.0268424	-0.0653875	-0.550464	-0.178075	0.135496	0.157535	0.0587556	0.148308	-0.181972	-0.162507	-0.154053	-0.295772	0.256921	-0.164704	-0.213771	0.224863	0.194996	-0.0671153	-0.140301	-0.102677	-0.0391532	-0.204494	0.0537207	-0.0953923	-0.0474061	-0.0970251	-0.173149	0.151987	1.22889	0.106003	0.0347366	-0.128134	-0.099864	0.0258775	0.0878062	-0.0562477	-0.100024	0.233782	-0.0431794	0.14719	-0.107072	0.126219	0.0960372	0.000465114	-0.133661	-0.348924	-0.0655034	0.036972	0.0339193
0.209038	-0.245981	0.18346	-0.226532	0.0818827	0.190346	0.155555	-0.0848005	-0.220152	-0.208501	0.125842	-0.0803943	-0.080195	-0.219595	-0.0290705	-0.131361	0.0955565	0.0148216	0.226822	-0.284396	0.224275	-0.0322391	-0.402473	-0.197815	-0.146934	-0.0168137	0.0907539	-0.118056	0.363719	-0.511177	-0.0775506	0.0491407	-0.175429	0.269763	0.172044	-0.124159	-0.064833	0.0348524	0.168117	-0.00806392	-0.438585	0.113782	-0.146656	-0.0832134	0.0360532	0.0493601	-0.00581381	-0.0783327	-0.113715	-0.222066
0.194887	-0.254586	0.269383	0.495249	-0.0748789	-0.10584	-0.0855802	0.0935545	-0.00211654	-0.171273	0.0907158	0.326832	-0.0495095	-0.0222332	-0.22868	0.125867	-0.371612	0.0941019	0.0203011	0.150577	0.237998	-0.010711	0.38389	0.374067	-0.10824	-0.0639657	-0.0794431	-0.180809	0.277921	-0.38034	-0.0224358	0.0666864	0.0268649	-0.0827733	0.0320829	-0.127252	0.0413825	0.375489	-0.0514969	-0.146684	0.133693	0.118224	0.134945	0.103232	0.0754643	-0.153619	-0.101012	-0.0670928	-0.239462	-0.283205
0.27548	0.245861	-0.166135	-0.58655	-0.0808984	0.202932	0.202686	-0.120704	-0.162221	0.121568	-0.00647037	0.0425367	-0.0887999	-0.266168	0.166998	-0.204842	0.133875	0.0764781	-0.00447761	-0.360258	-0.147193	0.230872	-0.294677	-0.0664843	-0.164684	0.319719	0.104521	-0.14907	-0.0569562	-0.336364	-0.114691	-0.163284	0.0620768	-0.112334	-0.102771	0.111482	-0.0668517	-0.0170574	-0.152948	-0.181775	0.115939	0.0217405	-0.0181418	-0.141811	0.0505041	-0.175093	0.143367	-0.0867946	0.201338	-0.26448
-0.466119	0.0506387	-0.188832	0.0192781	0.207217	-0.339525	0.141583	-0.111767	0.162027	-0.193974	0.106521	-0.113547	0.0771162	0.100743	0.123853	0.0321305	-0.302311	-0.0636935	-0.0944423	0.036707	0.00564607	-0.0565591	-0.0747198	0.0947023	0.0485378	-0.00478777	0.123322	0.225044	-0.364697	-0.559597	0.128222	0.00157389	-0.129341	-0.111638	0.321994	-0.434051	0.0456176	0.299566	-0.123559	0.210757	0.0689685	0.126761	-0.330485	0.130715	0.0657177	-0.114851	-0.084148	0.293897	0.289748	-0.237968
-0.362251	-0.110601	-0.0834089	-0.465062	-0.130736	0.378594	-0.0108781	0.111956	-0.231363	0.142122	-0.118959	-0.319683	0.066823	-0.251554	0.0520096	-0.172213	0.161102	0.123104	0.234238	0.225809	-0.0971786	0.416496	0.0508087	-0.169813	-0.17454	-0.0547821	0.0900018	-0.0655364	-0.343329	-0.627497	0.130351	-0.201573	-0.116212	-0.133431	-0.101851	0.149366	-0.0762452	-0.251079	-0.229743	-0.0676245	-0.193185	-0.277065	0.0888204	-0.10189	0.0638629	0.0882121	0.162682	-0.0645038	0.00505637	0.100422
0.0691584	-0.114776	-0.0399696	-0.580755	-0.138831	0.0834766	-0.114994	0.144113	0.256937	-0.10729	-0.0461082	0.0996281	-0.137701	-0.245321	0.0698896	-0.0395958	-0.333816	0.0814565	0.0694267	-0.0360635	-0.0882282	-0.0978414	-0.226301	-0.0249574	0.0524841	-0.0163711	-0.103844	-0.073551	-0.0915852	-0.648865	0.111967	-0.00957426	-0.129631	-0.0693956	-0.135288	0.199333	-0.0877916	-0.349113	-0.026942	-0.0317875	0.0567082	0.053837	0.0747885	0.147702	-0.215077	-0.182226	-0.0597242	-0.0886502	0.048464	0.0884466
0.167259	0.0275321	-0.0551714	-0.350245	-0.165016	-0.0950781	-0.0248002	-0.00323129	-0.256902	-0.184111	0.0449039	-0.0988124	-0.25381	0.175757	-0.20772	-0.217766	0.240573	0.0446746	-0.0693623	0.458781	0.161431	-0.0733912	0.196121	0.129615	-0.0239527	-0.00122651	0.093572	-0.337193	-0.0958026	-0.495782	-0.0576078	0.106555	-0.156385	-0.0703882	0.21114	0.09466	-0.120695	0.118174	-0.149809	-0.0351444	0.137258	0.34118	-0.160263	-0.0290619	0.0407202	0.0685346	-0.0484212	-0.0889036	-0.143733	0.0763978
-0.39496	0.0803146	-0.197037	-0.115804	0.249362	-0.104478	0.136157	-0.0378639	0.132461	-0.0113654	0.0177038	-0.196858	0.0239065	0.315373	0.33881	0.0247054	-0.257506	-0.0137873	-0.0335267	-0.197685	-0.102736	-0.0912571	0.106023	-0.013338	0.0416341	-0.050663	-0.129237	-0.286478	-0.0286814	-0.563659	-0.0508315	-0.161616	0.0567199	-0.00498412	-0.111021	-0.0624374	-0.0416315	0.308762	-0.136307	0.249235	-0.396133	0.128942	0.115719	-0.15706	0.069364	-0.0284696	0.043338	-0.0625353	0.370433	-0.159011
0.246645	0.264475	0.148958	1.01568	0.326181	0.325637	0.126555	0.10581	0.208154	-0.101335	-0.141898	-0.171356	0.103264	0.186532	-0.160581	0.157689	0.153211	0.218929	0.162255	0.595351	-0.0918214	-0.0362222	-0.0785976	0.145105	0.0942351	-0.0589958	0.172332	0.227326	0.296793	1.90567	0.157977	0.104512	0.150324	0.262305	-0.122083	0.247034	-0.00955711	0.0339116	-0.104586	0.112397	0.0934504	-0.0986591	0.143981	0.113465	0.0449365	-0.0222998	0.160675	0.217984	0.311964	0.151806
0.1663	-0.0274053	-0.0476377	-0.329901	-0.128838	-0.149753	-0.0842552	-0.082462	-0.131421	-0.162671	-0.17577	-0.293832	-0.293969	0.239802	-0.141542	-0.142196	-0.191177	0.0892311	-0.24792	0.0229905	0.210253	-0.0689829	0.188941	-0.0518136	-0.169032	-0.010871	0.112343	-0.300846	0.344639	-0.485336	0.0932949	-0.00569307	0.105198	0.346456	-0.0765033	0.189326	-0.0626264	-0.0468258	0.346124	0.117656	-0.484683	-0.295466	-0.16782	-0.0948446	0.00548129	-0.153425	0.157553	0.0488785	-0.066504	0.0752115
-0.19449	-0.208585	-0.168406	-0.31891	0.0676572	-0.158372	-0.113736	-0.0787261	-0.125507	-0.24488	0.136041	-0.0602915	-0.267309	0.32886	-0.000708784	-0.120324	0.256343	-0.0981243	-0.0737802	-0.259059	-0.0424274	-0.0721185	0.0928127	-0.255792	-0.0278989	-0.0836531	0.072899	-0.101571	-0.0176032	-0.350505	0.16026	-0.0695445	0.0594446	0.0787683	0.273631	-0.0601961	-0.0496306	-0.0129065	-0.147956	-0.231605	0.198874	0.307344	-0.0292902	0.0359495	0.0424598	-0.101079	-0.170061	-0.0895396	-0.280693	0.112484
0.346207	0.0741109	-0.0434758	-0.469713	-0.146993	0.39956	0.0538557	-0.0935226	-0.0349455	0.177531	0.112342	0.384202	0.0287961	0.323658	-0.211039	-0.190901	0.251626	0.146662	0.108649	-0.336018	-0.107868	0.240677	-0.15362	-0.0557241	-0.0419803	-0.0699668	0.0780245	-0.189003	0.258884	0.447264	-0.130379	-0.110919	0.0744715	0.438476	0.16171	-0.254256	-0.0445392	0.190241	-0.0967729	-0.0449323	-0.0824936	0.341696	-0.0809557	-0.025191	0.0968923	-0.060859	0.030574	-0.0624673	0.0894972	0.0916503
-0.469304	0.243531	0.0182421	1.49476	0.0996527	0.268698	0.142734	0.129297	0.225389	-0.316429	0.122388	0.127092	-0.0552462	0.217445	0.0672559	0.411092	0.0521355	0.134236	0.211182	0.533592	0.0257833	-0.0509855	0.335053	0.18844	0.0785407	-0.00547447	0.0954022	0.301311	-0.0249606	1.98797	0.12664	-0.150668	0.175207	0.0902891	0.161022	-0.139828	0.0447558	0.352642	-0.102275	0.186601	-0.378835	-0.193289	0.109311	0.0881687	-0.225358	0.168928	0.181125	0.244774	0.250106	0.147265
0.322012	0.0473631	-0.215455	-0.487682	-0.023882	-0.0809577	0.140395	-0.0973512	0.0116396	0.0274806	0.128882	-0.136103	-0.321461	-0.177179	-0.147895	-0.186233	-0.164853	-0.432798	-0.0255616	0.265453	0.0186905	0.0165973	0.11926	-0.252538	0.0377726	-0.0208642	0.0126326	-0.160844	-0.154318	-0.603159	-0.386915	0.147776	-0.117319	0.413855	0.178173	0.0849093	-0.0689375	-0.0804257	-0.0623324	0.191558	0.098529	-0.0912863	0.0684281	-0.0864952	0.054936	-0.0358487	-0.0617794	-0.0827458	0.0997348	0.0894876
0.152134	0.17383	-0.0611523	1.64545	-0.144181	0.0938284	0.112464	0.0643013	0.228911	0.167012	0.0845885	0.309589	0.256313	0.22555	0.250218	0.116703	0.174349	0.155773	0.139058	0.0749483	0.174478	0.181172	-0.360932	0.268172	-0.164362	-0.0353806	0.0983655	0.238912	0.318269	1.90206	0.135211	-0.107036	0.0633331	0.227428	0.250239	0.155872	0.0833922	0.311603	-0.0992187	-0.0425415	0.0692073	0.275852	0.121903	-0.109925	0.052378	0.051168	-0.338117	0.19317	-0.187643	0.139935
-0.464431	0.0942172	0.3091	-0.196375	0.0158135	-0.344078	-0.0929101	0.0928262	-0.238761	0.188756	0.0909436	-0.081027	0.308032	-0.248401	0.0946595	-0.198058	-0.214783	0.0997888	-0.367343	-0.123311	-0.0989452	-0.0933971	0.0646217	0.0126346	0.0967005	-0.0288352	-0.108287	0.259509	-0.345003	1.16384	0.113573	0.0957244	0.0618841	-0.115999	-0.154959	-0.356375	-0.0802363	0.0637559	0.0559233	-0.0674781	0.0537913	0.126743	-0.392315	0.114248	0.094328	0.0297163	0.149663	-0.0755774	-0.137905	-0.272198
0.241805	-0.228762	-0.050987	-0.499005	-0.154962	0.0375122	-0.101648	0.129495	0.201198	0.156628	-0.152677	0.199854	0.0331575	0.20968	-0.18378	0.321532	0.0584131	0.0649693	-0.0900195	0.455433	-0.102699	0.0184671	0.0818543	-0.0390546	-0.216373	-0.0383822	0.137832	-0.112955	-0.0756691	-0.56932	-0.0583338	-0.158498	-0.111702	-0.119177	-0.174885	0.265538	-0.013629	0.104112	-0.189605	0.293956	0.147828	-0.145413	0.34184	-0.0579555	0.0330616	0.0683448	-0.059463	-0.0644628	0.240108	-0.00359342
0.188008	-0.188208	-0.0641498	-0.427007	0.0786634	0.374668	-0.145573	-0.00776021	-0.356461	-0.260104	0.0302688	0.30814	-0.0575249	0.12132	0.120804	-0.0590114	-0.198199	-0.421833	0.232196	-0.021121	-0.0435606	0.0591186	-0.168099	-0.0788154	-0.0903781	-0.041227	0.122433	-0.110227	0.0341811	-0.408905	-0.321751	0.037562	0.0711376	0.333227	0.0805962	0.175582	-0.000459278	0.163084	-0.0318355	-0.172554	0.126341	0.11993	-0.298729	0.0476108	0.0342818	0.0275202	-0.0976168	-0.0779557	-0.259475	0.109453
-0.114228	0.271893	-0.222137	-0.49816	0.1942	0.100748	-0.10158	0.0239172	0.0824022	-0.0498299	0.149454	0.169472	-0.246315	0.212359	0.0619587	-0.196763	-0.202749	0.0154495	-0.0631049	-0.335756	-0.0249545	0.26616	-0.260692	-0.0290088	-0.142379	0.0872376	-0.0671036	0.226308	-0.0324419	-0.631963	-0.125004	-0.166037	-0.128347	0.36466	-0.162248	-0.297608	0.0114056	-0.105225	-0.12246	-0.0859538	0.131944	0.34088	0.055668	0.094947	0.0891202	-0.0154961	-0.121542	0.0618501	-0.222665	0.105582
0.184192	0.184947	0.20226	-0.119137	0.014703	-0.134364	-0.0654167	0.0967331	-0.226934	-0.0168849	0.0235765	-0.237646	-0.319137	0.226797	0.068763	0.236594	-0.104643	-0.0220214	-0.00808422	-0.325711	0.214357	0.343245	-0.305861	-0.275292	-0.129609	-0.0496136	0.0911228	0.255687	0.193273	-0.569135	-0.0474063	0.106802	-0.0884205	-0.152684	-0.125101	-0.210325	-0.0283888	-0.309016	0.22615	0.113215	0.126538	-0.177075	-0.11239	-0.103988	-0.195384	-0.0274986	0.042277	0.290037	0.0947446	0.103873
0.0318007	0.0273805	0.213154	-0.480079	-0.110233	-0.0977585	0.0104302	-0.0931615	-0.3065	-0.16443	-0.0978127	0.202329	0.065624	-0.0862168	0.189504	-0.156774	-0.129973	0.133253	0.198168	-0.28962	0.233094	0.341926	0.397004	-0.209769	-0.147376	0.258601	0.0594748	-0.263834	-0.398346	-0.487188	0.123462	-0.0413673	0.0787488	-0.123579	0.180905	-0.0468137	-0.0586349	-0.238477	0.197501	-0.194111	0.0360846	0.113717	0.0974144	0.106955	0.0307389	0.05554	0.119565	-0.0854423	-0.255829	0.0492689
-0.274563	0.209489	-0.202852	-0.19486	-0.124942	-0.0981314	0.125392	0.0803499	0.114924	-0.289543	-0.115908	-0.179781	0.0767766	0.229083	-0.186199	-0.210814	-0.266436	-0.423617	-0.336757	0.0266719	-0.0985641	-0.0786483	0.126165	0.02212	0.0765582	-0.0386971	0.143624	-0.134283	-0.00455581	-0.634538	0.104747	-0.178872	0.134573	-0.118674	-0.0278382	0.123764	-0.119272	-0.244359	0.00411784	-0.0342194	-0.392252	-0.12857	-0.168781	-0.12784	0.0190687	0.00586138	0.257436	0.0451257	0.295979	-0.183719
-0.321729	0.0075814	-0.0329646	-0.391102	-0.0640749	-0.0792473	-0.129317	0.0613504	-0.0361103	0.211751	0.0680759	-0.274248	-0.0329861	-0.19245	-0.195088	0.090068	0.24127	0.171094	-0.363877	-0.312869	-0.138868	0.284293	-0.363443	0.0127591	-0.0994873	-0.0457057	-0.0921413	0.208259	0.197938	-0.326441	0.011487	0.305574	0.0296938	-0.114374	0.238403	-0.248199	-0.075296	0.0702761	0.242164	0.137104	0.0728596	-0.260343	-0.351415	0.0866767	-0.186865	0.0103035	-0.144494	-0.0632176	-0.171244	0.0719904
-0.446424	0.267152	-0.0573999	0.00458934	0.0481486	0.225081	-0.106405	0.0439223	-0.210891	0.161772	-0.0508007	-0.329641	-0.218821	-0.0827566	-0.168656	0.11707	-0.227846	0.106707	-0.288529	-0.0358969	0.197552	-0.0525933	0.186258	-0.244429	-0.0975323	0.00636294	-0.00825614	-0.326186	0.371496	-0.0506103	0.17866	0.0294166	0.0925274	0.35229	0.174043	0.242972	-0.0644106	-0.0162428	-0.0187401	-0.191615	0.107122	-0.288053	0.0429095	-0.0780656	0.0517736	0.0936455	-0.134023	0.0264854	-0.0995257	0.108381
0.281201	0.272819	-0.0167006	0.158335	0.299887	-0.365584	0.179309	-0.118996	-0.181795	-0.223472	-0.236422	-0.10636	-0.00112788	0.120007	0.0912995	0.100312	-0.185307	0.15427	0.00151806	-0.29076	0.00152155	-0.0802513	0.263783	0.185816	0.288418	-0.0286026	-0.105799	-0.154055	-0.384976	-0.39764	0.162138	0.0142703	-0.10834	-0.110811	0.202287	0.133717	-0.0604386	0.0688881	0.0877936	0.162167	0.0514639	-0.260601	-0.162042	-0.128186	-0.232273	-0.129669	-0.109359	-0.0762078	0.528138	0.106488
0.192089	0.011407	-0.12883	-0.542701	-0.147239	0.330611	0.111717	-0.0187234	0.149515	-0.32309	0.144853	-0.169617	-0.294156	0.246949	0.129041	-0.218137	0.213069	0.112911	0.188969	-0.0569054	0.14431	0.244407	-0.3456	0.207284	-0.12936	-0.0247458	0.0794066	-0.282038	0.288987	0.912644	-0.323809	0.0536675	-0.0969093	0.275921	0.20138	0.0558816	0.0112292	-0.222545	0.0785558	0.146428	0.128337	0.0558682	-0.248254	-0.152312	0.0253498	-0.044234	-0.124177	-0.0736023	-0.04176	0.108131
0.214544	0.0942529	-0.0820062	-0.497426	-0.118573	0.156463	-0.0625311	-0.0764544	-0.260406	0.107525	0.123717	-0.0998432	-0.116182	0.318595	0.070006	-0.00392902	-0.1359	0.149208	-0.00984735	0.242811	0.0362609	-0.0612042	0.395369	-0.189914	-0.0258254	-0.0349497	-0.0697889	-0.147318	0.281724	-0.333152	-0.0644288	0.00549244	0.0836543	-0.110809	-0.0866568	-0.0489184	-0.0473129	-0.283436	-0.125348	-0.0678682	0.135608	0.281389	0.0823828	-0.192075	-0.207186	0.00845304	-0.456078	-0.0721147	0.253034	-0.166656
-0.101931	0.213776	-0.0211049	1.6807	-0.163157	-0.0446924	0.11871	0.0901217	0.239541	0.106005	0.139225	0.266678	0.311866	0.313217	0.122054	0.336372	0.0997535	0.159902	0.213695	0.133594	0.0247267	-0.0708251	0.10455	0.263737	0.304546	-0.0192632	0.124763	0.241605	0.13236	1.9271	-0.0122718	-0.150763	0.0981777	-0.0197027	0.221786	0.258426	0.107657	-0.375319	-0.092491	0.208713	0.0647245	0.0994482	-0.0579753	0.127528	0.0693459	0.180402	0.172811	0.248066	0.353787	0.164138
-0.0499267	-0.199103	-0.021634	0.0325605	-0.101421	-0.0859464	-0.119675	-0.00148578	-0.106905	-0.10296	0.0693119	-0.147291	0.0200438	-0.181743	0.0374918	-0.203417	-0.312864	-0.0129955	-0.314375	0.147448	0.0162667	0.257481	-0.230182	-0.251995	0.28193	-0.0587698	0.125673	-0.136123	-0.00116021	0.134764	-0.0825445	-0.150432	0.0480317	-0.124125	-0.109579	0.0847969	-0.0660686	-0.134259	-0.149938	0.214662	0.0483013	-0.114372	0.257437	-0.112626	-0.0681705	-0.13354	-0.19735	-0.069511	0.0726451	-0.150151
0.00950237	-0.0638255	-0.168743	-0.513517	-0.174485	-0.0661648	-0.129193	0.129372	0.131567	-0.127882	0.133845	0.270226	-0.109234	-0.289811	0.12071	0.282424	0.105852	0.155481	0.0125916	-0.0850952	0.0399057	0.260262	0.0819231	-0.0149819	0.310362	-0.024852	0.0742999	-0.0684894	-0.0999303	-0.392939	0.119951	-0.227475	-0.104975	-0.0860585	-0.140652	0.222529	-0.0540674	0.092801	-0.0959783	-0.0954139	0.0959767	-0.156997	0.109288	0.151993	0.00771739	-0.112648	-0.13068	-0.0842312	0.00513159	0.158858
-0.360925	-0.13475	0.144021	-0.549921	0.306095	0.0932472	0.213605	-0.105922	0.162865	0.172653	-0.146882	0.134011	0.0367064	0.301665	0.0407054	-0.0908969	0.189327	-0.0699795	0.176308	0.50813	0.228095	-0.0708262	0.0886251	-0.185015	0.0977631	-0.028612	0.121094	-0.0736648	0.145965	-0.666191	0.108594	-0.121391	-0.107265	-0.12958	-0.00810503	-0.0867917	0.0593438	0.0171162	-0.12816	0.225888	0.159288	0.235775	0.157146	0.110922	0.0442622	0.0501817	-0.294814	0.0353039	0.0236661	0.0501534
0.222957	-0.326979	-0.152176	-0.29324	-0.18881	-0.135287	-0.0921526	0.14208	0.142174	-0.123486	-0.113888	-0.172435	-0.114485	-0.0941716	-0.176533	-0.0255897	0.211589	0.111665	0.195461	-0.275018	-0.109079	-0.0526339	-0.28797	-0.0401285	0.0079207	0.318868	-0.124626	-0.0949374	-0.0810853	-0.451529	0.16668	-0.166757	0.060212	0.087688	-0.135718	-0.197149	0.000859837	-0.024928	0.254618	-0.0320824	0.119916	-0.140065	0.449801	0.101668	-0.158399	0.077738	-0.274434	0.0494969	-0.194678	-0.140927
0.109992	-0.331753	0.00062885	1.72931	-0.00997418	0.109765	-0.0369617	0.132819	0.207793	-0.0709787	0.0751337	0.231544	-0.03811	0.190748	-0.257302	0.308534	0.215105	0.151551	-0.127273	0.568237	-0.0709195	-0.0325677	0.328101	0.332027	0.267838	0.0287347	0.102348	0.20381	-0.0492561	1.98369	0.108319	0.0323629	0.167349	-0.0988382	-0.0550449	-0.447343	0.0793343	-0.0271679	-0.123385	-0.000759022	0.0689913	-0.0988902	-0.323324	0.0749809	-0.248551	0.21372	-0.222396	0.262539	0.382095	-0.22437
0.117885	0.0529814	-0.0198333	-0.254982	0.327745	-0.393883	0.242288	0.0974754	0.240219	0.136571	-0.120549	0.00329124	0.0393244	-0.253573	0.098565	0.124656	0.26619	0.149335	-0.0181458	-0.396884	0.313055	-0.0899013	0.152213	0.0430798	0.0980357	-0.0276365	0.114314	-0.116828	-0.0922623	-0.349356	0.158306	-0.146342	-0.138089	-0.155623	-0.151501	-0.016181	-0.1222	0.0946255	-0.159388	0.261203	0.112925	0.167186	0.120241	-0.340628	-0.219624	0.0405081	0.0382678	-0.0790027	-0.145443	0.0981024
0.228407	0.0499675	-0.208658	-0.177979	-0.136315	0.410236	-0.0522002	-0.0876232	-0.171325	0.102144	0.135901	-0.294452	0.363255	0.25282	-0.242136	-0.0293629	0.152713	0.133428	-0.0528519	0.438305	0.207712	-0.0347729	0.14814	0.226187	-0.0835889	0.199951	0.117824	-0.332909	-0.102078	-0.51614	-0.0903428	-0.127719	0.084475	0.342858	0.187805	-0.371878	0.0871421	0.317055	0.279303	-0.0639884	-0.0242406	-0.295498	-0.300997	-0.020749	0.0647225	-0.119509	-0.0955856	0.318891	-0.145251	0.100762
-0.458939	-0.139294	-0.0395699	-0.391454	-0.00147788	-0.260132	-0.0821483	-0.119251	0.169821	-0.297715	0.100032	-0.123609	0.0536917	-0.193579	0.0794446	-0.0902821	-0.363366	-0.393924	0.0988126	-0.044167	-0.111078	-0.0837814	0.143595	0.241452	-0.185913	0.0460493	0.109731	0.21631	-0.299742	-0.600941	-0.0665277	-0.205384	0.0487236	-0.165281	-0.0193174	-0.0943212	0.0372797	0.276654	0.273649	0.158954	0.0460196	-0.160545	-0.346713	0.151469	0.113808	0.201273	0.275235	-0.0824309	-0.112116	-0.199375
-0.425672	-0.168185	0.193683	0.825058	-0.153472	-0.0901087	0.195725	0.0846692	0.264347	-0.12948	0.137697	0.150522	-0.045147	-0.109241	0.0606666	0.275404	-0.126241	0.131393	0.267895	-0.167833	0.0341925	-0.0700206	-0.0785627	-0.263292	0.349096	-0.0349418	0.101606	0.224217	-0.24363	2.0683	0.114576	-0.154262	0.162569	-0.0282577	-0.172922	0.295647	-0.0132664	-0.342367	-0.131771	-0.179206	0.122537	-0.287279	0.100222	-0.178741	0.0494886	0.0238153	0.192166	0.288243	-0.143132	0.137361
0.258663	-0.148292	-0.0903052	-0.475341	-0.146263	-0.0798458	-0.034727	-0.116901	-0.187034	0.131311	-0.0805295	0.115609	0.0548504	-0.204305	-0.116903	-0.208046	0.290753	0.0676413	0.174018	-0.348159	-0.140204	-0.0962503	0.141322	0.23129	-0.100872	-0.030592	-0.107497	-0.253253	-0.0892067	-0.644254	-0.318962	0.237211	-0.121127	-0.0144598	0.276811	-0.0856975	0.081474	-0.0164378	0.260012	-0.0343965	0.0839813	-0.0677946	0.0877012	-0.243723	0.0155867	0.0331405	0.19693	-0.0933322	-0.183988	0.0792642
-0.134647	0.229928	-0.0752148	-0.252565	-0.0590752	0.149804	-0.0806162	-0.0936276	0.184358	0.18491	0.134261	-0.17574	-0.0482213	0.135146	0.160852	0.181255	0.208876	0.124487	-0.168667	-0.332664	-0.112259	-0.0844846	-0.0430531	0.172428	-0.0133163	-0.0112038	-0.0806364	0.268674	0.427597	0.140887	-0.356532	0.327609	-0.154396	0.304619	0.280337	0.119415	-0.077534	0.0575017	-0.102445	-0.00946145	0.0969463	0.365836	-0.179264	-0.0820148	0.0799395	0.202487	-0.287519	-0.0508108	-0.219587	-0.330663
0.192748	-0.18296	-0.076578	-0.44972	-0.123034	-0.269176	0.214621	-0.120458	-0.018351	-0.162119	0.0140026	-0.162787	-0.0856649	-0.161945	-0.200272	-0.0257832	0.330199	-0.361978	-0.0443393	-0.0511835	0.0370353	-0.082895	0.106022	-0.142684	-0.0829441	-0.0254745	-0.00135519	-0.304032	-0.314602	-0.389821	0.103126	-0.195904	-0.116854	-0.133878	-0.168492	-0.319239	0.0572628	0.291883	-0.0359229	0.202919	0.11583	-0.128092	-0.343445	-0.0578494	-0.138717	0.0496862	-0.105484	-0.0845147	-0.207157	0.0519684
0.245899	-0.192954	-0.0620935	-0.524998	-0.108751	-0.101619	-0.138838	-0.140815	-0.272015	0.134208	0.122368	0.308504	0.269969	-0.215968	0.148111	-0.00302053	-0.31995	-0.0137238	0.0587137	-0.338259	-0.143808	-0.030106	-0.204948	0.155591	-0.0898249	0.282867	0.11149	-0.141418	0.248231	0.997324	-0.120497	0.0345301	-0.10476	-0.152378	-0.14288	-0.0721427	0.0272897	-0.0108651	-0.160921	-0.091357	0.0924222	0.0433314	0.0950903	0.0842344	-0.26948	-0.128745	0.0848385	-0.0743225	-0.289566	-0.235019
0.17899	0.296376	0.201776	1.45789	0.0622398	0.150832	0.0266202	-0.102669	0.186725	0.15599	0.128262	-0.21603	0.276744	0.15687	0.252606	0.29409	0.211486	0.13623	0.115692	0.314028	0.10396	-0.0517118	0.301925	-0.021425	0.0360713	0.193405	0.137693	0.300967	0.265375	1.87065	0.121889	0.118822	0.135521	-0.07769	-0.0848094	0.133274	0.0897068	0.211372	-0.00975919	0.0303678	0.130685	-0.070783	0.170873	-0.0446797	0.0647899	0.160678	0.209545	0.225939	-0.257876	-0.32657
-0.461047	-0.329154	-0.214488	0.852132	0.07466	0.410277	-0.00547522	-0.0982618	-0.19284	0.027732	0.120892	-0.218999	-0.268142	0.213548	0.0190814	0.0631809	0.181925	-0.0132872	0.131118	0.261693	-0.0336875	-0.0776312	-0.265105	-0.26199	-0.0241537	-0.240433	-0.147567	0.208682	0.181955	-0.639058	0.14719	-0.135691	-0.146147	0.313468	0.132762	-0.384273	-0.0374943	0.0992235	-0.110184	-0.206988	-0.509145	-0.120305	-0.0100571	0.0884507	0.0569475	0.165953	-0.352447	0.0198116	0.270314	0.103754
0.220713	-0.026144	-0.0476295	-0.500542	-0.116612	0.416204	-0.0161501	0.0562649	-0.300901	0.146535	-0.0946014	-0.343024	-0.283854	0.21811	0.224218	-0.153362	0.222331	0.0662583	0.172955	0.43003	-0.0772723	0.0317632	-0.288269	0.192537	-0.0971332	-0.0583683	-0.000482114	-0.191377	-0.135587	-0.567069	0.0731053	0.134633	0.10571	0.33834	-0.117093	-0.102056	0.0440485	-0.00482939	-0.0859229	-0.0477404	-0.505645	0.316859	0.0801967	0.0939747	0.00907687	-0.159182	-0.32671	-0.0833935	-0.209558	0.0490914
0.230062	-0.0422279	0.316024	-0.411632	-0.0886416	-0.0891428	0.0261487	0.00527699	0.142954	0.122087	-0.00678118	-0.232697	-0.159363	-0.235413	-0.166291	-0.23117	0.215169	0.107503	0.0782401	-0.345318	0.0264364	0.254747	-0.0554407	0.00475874	-0.182282	-0.0330918	-0.0174644	-0.0346743	-0.116521	-0.197228	-0.308046	0.0633815	0.0505321	-0.120057	-0.104771	0.162343	-0.0547885	0.23226	0.213665	0.134031	0.0982861	-0.12891	0.238485	-0.10507	0.0123171	-0.155763	0.124566	0.0543701	-0.203202	-0.287738
0.198748	-0.0195078	-0.152556	1.69825	0.377473	-0.073299	-0.0503879	0.135002	-0.247911	0.148431	-0.137313	0.305747	0.00969249	0.225806	-0.194225	-0.021416	0.286878	0.205482	0.276859	0.104827	0.0405391	-0.0585757	0.170715	0.258145	-0.115236	0.230285	0.110386	-0.0902125	0.249055	0.931462	0.0854892	0.0909905	-0.170815	-0.117488	-0.14754	0.181427	-0.0186077	0.218347	0.235825	0.239298	0.00955131	0.0753216	0.17107	0.092511	0.0156146	0.0777958	0.137653	0.0370811	-0.12077	0.119282
-0.00393103	0.0704693	-0.219873	-0.302267	-0.121292	-0.103182	0.141107	0.152715	0.128894	-0.115159	-0.173042	-0.214748	0.0879912	0.126608	0.164315	0.052293	-0.345135	0.125427	0.0951378	-0.055414	-0.103429	-0.100334	-0.139297	0.0670967	-0.0311535	0.0166413	0.127477	0.253676	-0.143	-0.594324	-0.0352387	-0.169589	-0.121674	-0.130172	-0.164987	-0.25215	-0.0540291	0.251157	-0.041567	0.240404	0.115023	0.0986317	0.191455	-0.133949	0.0365198	0.089794	0.141004	-0.0686136	-0.219368	-0.204379
-0.129379	0.0601835	-0.000914045	-0.50823	-0.102832	0.101552	-0.0792594	0.0138434	-0.0288812	-0.301944	-0.105995	-0.148049	-0.0044632	-0.0795934	0.0309621	-0.136444	0.0972116	0.021055	-0.366539	0.181051	0.285032	-0.111069	0.343627	-0.231553	-0.114343	-0.0399772	0.105954	0.1866	0.149505	1.16134	-0.234828	-0.12708	0.0947047	-0.021513	0.135945	-0.0181663	0.011915	-0.23941	0.259007	-0.0377357	-0.184566	-0.135184	0.241667	-0.109143	0.0228219	0.0976522	0.0479726	0.0401944	-0.115365	-0.000825966
-0.178377	-0.128694	-0.0583794	-0.397082	0.0586662	-0.0832724	0.209914	-0.109941	-0.0958832	-0.234371	0.125652	-0.227882	0.345774	0.134147	-0.16385	-0.132741	-0.316292	0.0912502	-0.0832827	-0.300758	0.213024	-0.038007	-0.166918	-0.264927	-0.1574	-0.00605044	0.0551659	-0.320527	-0.321474	0.490788	-0.0721888	-0.0107308	-0.0455486	-0.137619	0.0330924	0.202971	-0.0827615	0.106588	0.284646	-0.175117	0.110686	-0.136747	-0.122631	0.118983	0.0455701	-0.00380497	-0.0813874	-0.0814856	-0.135809	0.100469
-0.0327954	-0.059173	-0.218739	-0.491008	-0.149976	0.138006	-0.0882815	0.11695	-0.164138	0.165603	-0.0502257	-0.165293	-0.276157	0.291458	-0.20118	-0.19319	-0.259293	-0.0139285	-0.0478252	-0.166829	-0.0503307	-0.0504498	0.0648603	-0.0117175	0.0183414	-0.029133	0.0470428	-0.299774	-0.175411	-0.578329	-0.103773	-0.201525	0.0750137	-0.103406	-0.0976393	0.0868306	-0.0741423	0.118165	0.013342	0.00697388	-0.122725	-0.163028	-0.140753	-0.0741661	0.0413367	0.0231456	-0.10281	-0.0871483	-0.0446815	0.0774738
0.228584	0.210698	0.344859	-0.50327	-0.128608	0.394736	-0.0469209	0.0806603	-0.043309	-0.0624854	-0.18845	0.224836	0.0940914	-0.111741	0.0728266	-0.0400009	0.202189	0.195486	0.215106	-0.101556	0.0513467	-0.00582168	-0.269939	0.00279146	-0.0373015	-0.00903741	-0.115056	-0.139875	-0.00485686	-0.554507	0.149048	-0.192703	0.117828	0.189261	-0.121891	0.032853	-0.0669037	-0.248939	0.208547	-0.00968102	0.10406	0.271682	0.39071	-0.124499	0.0245765	0.0508697	-0.0339941	-0.0808723	0.246867	0.0802778
-0.20401	0.181439	-0.139102	-0.460448	-0.0718956	0.0815184	-0.0549459	-0.0932255	-0.24793	0.152535	-0.166294	0.0751808	-0.30871	-0.156634	0.25916	-0.19957	0.209405	0.0831895	0.0679425	-0.168566	-0.123688	-0.0625523	-0.351459	0.125378	-0.00362115	-0.0222862	-0.0894653	-0.26606	0.236522	-0.647534	0.160645	0.167556	0.0901319	0.336585	0.11432	0.10391	-0.0756536	-0.335627	0.165804	0.216089	-0.435611	0.372764	0.0789228	-0.115046	0.0625644	0.0536003	0.115592	-0.0795692	-0.10355	0.072479
-0.407287	0.164129	-0.0313731	0.903188	-0.00151157	-0.276423	0.200615	0.140937	0.013999	0.195536	-0.163558	-0.15753	-0.0597744	-0.20866	0.0305302	0.280931	-0.311953	0.141249	0.034231	0.0380077	0.0365623	-0.0967533	0.0742813	0.0303379	-0.12993	0.185865	-0.00697101	0.310314	-0.311183	-0.667382	0.0777248	-0.198583	0.0708775	-0.103842	0.259484	0.139528	-0.0636243	0.22675	-0.0914345	-0.0258463	-0.275761	-0.324	-0.17705	-0.110577	0.0142751	0.243543	0.13041	0.0467572	-0.232243	0.0978451
-0.318988	-0.157017	0.184947	0.589506	0.238066	0.23884	0.147445	-0.114115	-0.15795	0.220546	-0.0337345	0.291128	0.300736	-0.231961	-0.1866	-0.216626	-0.322616	-0.106354	0.101277	-0.350627	0.0238061	0.27784	0.0964099	0.222472	0.0327502	0.0376929	-0.0954489	-0.0778878	-0.317818	-0.454583	0.140091	0.156809	0.0493523	-0.124322	-0.0828238	0.0882643	-0.0435654	-0.0215579	0.0257094	0.204957	0.130901	-0.253391	0.05442	0.131238	-0.237173	-0.0362773	0.311043	-0.0851714	-0.114508	0.0980648
-0.111218	0.00641875	-0.155938	-0.467387	0.272331	-0.0845208	0.0544498	-0.0399673	-0.284003	0.156621	0.0945496	-0.185436	-0.017813	-0.0248135	-0.157299	0.079417	-0.186411	0.0265619	0.0986697	-0.368519	-0.10952	-0.0284776	-0.17558	0.259014	0.0412071	0.0487191	0.106172	0.263921	-0.361474	-0.183373	-0.0891924	-0.130567	0.167473	-0.107383	-0.170582	-0.243513	-0.0692782	-0.0170262	-0.0453137	-0.0716103	0.120741	0.0316527	-0.134893	0.0897576	0.0203637	-0.111406	0.186152	-0.0805653	-0.298398	-0.174462
0.108826	-0.0532807	-0.0283255	-0.551333	0.241967	-0.0793259	-0.103857	0.153058	-0.0632543	-0.164599	0.0758053	0.198058	-0.200674	-0.137309	0.254069	0.0812235	0.224724	-0.351666	-0.287424	-0.339982	-0.093364	0.164601	-0.301906	0.294943	0.0801163	0.0224701	-0.055027	0.301753	-0.0740806	0.394052	-0.0912904	0.193621	0.0403177	-0.120946	-0.144951	0.0949454	0.0871751	-0.00401044	-0.126653	0.0290356	0.033191	-0.0978713	-0.0348397	0.111723	0.0675186	0.0662962	0.0422333	-0.0737743	-0.148706	-0.160526
0.287143	0.163056	0.206464	-0.510583	-0.137216	0.364396	0.154328	-0.0743163	0.000210296	0.161034	-0.152172	0.0840156	-0.357125	-0.0686724	-0.208892	-0.252204	0.253317	0.104606	0.026133	-0.276397	0.0328772	0.237464	-0.18368	0.176627	0.0316785	-0.030682	0.0483698	-0.177027	0.225287	-0.630225	0.148155	-0.00334035	0.228028	-0.0796792	0.165314	-0.220629	-0.0499582	0.285211	-0.0163087	-0.00118391	0.118172	0.258158	0.154032	0.0585288	-0.319924	-0.11891	-0.0572739	-0.0655563	-0.0299159	0.0846605
-0.0138227	-0.052284	-0.0745478	-0.502448	-0.0551143	-0.105123	-0.0989288	-0.0854246	0.178578	0.11501	0.115619	-0.124941	-0.0928759	-0.278811	0.259747	0.000124717	0.00706581	-0.381974	-0.317919	-0.100851	0.0358202	0.356558	-0.186448	0.10308	-0.112709	-0.188624	-0.135459	0.235538	0.214538	-0.650561	-0.246235	-0.256278	0.0659688	-0.122094	-0.0075682	0.0776479	-0.113481	-0.195484	-0.0437217	-0.0540932	-0.0354691	-0.143706	-0.185039	-0.0933457	0.0593384	0.061002	-0.336864	-0.0683277	-0.195037	0.107564
0.215755	0.0449157	-0.0318053	-0.206951	-0.084742	0.379687	-0.0964844	-0.0142024	-0.103707	-0.158946	0.100825	-0.0981067	0.054993	0.294286	0.104127	-0.219071	0.183067	0.114518	0.0687483	0.549895	0.0224504	0.209604	-0.081155	0.178694	-0.0988144	-0.0171613	-0.0920039	-0.0759642	0.335237	1.69607	-0.090876	-0.146519	-0.0906229	0.400087	0.1265	-0.290564	-0.0683468	0.0251516	-0.03442	-0.0669772	0.135074	0.197156	0.0216593	0.051189	0.0787694	0.0676436	-0.153133	-0.0692715	-0.221775	-0.295312
-0.238893	0.00619942	-0.160628	-0.357949	0.0596107	0.399151	-0.0900285	-0.0308309	0.197724	0.176145	-0.0358228	0.215845	-0.342791	-0.19795	0.320936	-0.296872	0.264395	0.127001	0.281535	-0.349073	0.263163	0.295471	0.128856	0.31012	-0.00652452	-0.0253472	-0.0709855	0.240998	-0.126153	-0.0878964	-0.0785593	-0.195279	0.0399909	-0.11636	0.0571346	-0.104888	0.0115506	0.31822	-0.123529	0.232013	0.0733834	0.33178	0.198271	-0.0334237	0.112914	0.0766823	-0.11646	-0.0818268	-0.0759657	0.0940302
0.194382	0.0157828	-0.0643146	-0.409562	-0.000575377	-0.326258	-0.111555	-0.15717	-0.0729419	0.133316	-0.122718	0.224937	0.0696036	-0.0882545	-0.165454	-0.156318	-0.180625	0.177934	-0.0702023	-0.344543	-0.122334	-0.0677533	-0.0525992	-0.0796479	0.203009	0.0133745	-0.212383	-0.106342	-0.150941	1.22823	-0.135356	0.062663	0.0202263	-0.0906541	0.0038438	-0.0558996	-0.0588251	-0.28777	0.284628	0.259919	0.090808	-0.152972	0.0991298	0.129134	0.0441991	-0.127443	0.182364	-0.0749856	-0.0546606	-0.279766
0.296062	-0.291694	-0.0647994	0.197528	0.0862627	-0.314324	-0.0635471	0.0771522	-0.0683087	-0.11969	0.0916553	-0.23033	0.0382874	-0.202345	-0.259707	-0.058615	-0.249818	-0.252224	-0.16821	-0.270451	-0.123633	-0.0392882	-0.00684317	0.210708	-0.156239	0.0616729	-0.152938	0.26589	-0.00725395	0.1778	-0.0869956	-0.0163392	0.185808	-0.156522	-0.107409	0.160708	0.0735931	0.344705	-0.197275	-0.151394	0.0493633	-0.130523	0.154221	0.121916	-0.166786	-0.163529	-0.0478038	-0.0744356	0.195156	-0.241559
0.214784	0.0166561	-0.0659737	0.0576489	0.0931806	-0.438823	0.157963	-0.0830115	-0.241646	0.138594	0.121796	0.0534656	-0.0392138	-0.249288	0.0904186	0.247967	-0.281812	0.0799717	-0.124729	-0.373959	0.0166137	0.229667	-0.172572	0.0152191	-0.0445735	-0.00310421	0.128723	-0.373895	-0.14602	-0.583122	-0.0885687	0.169311	0.173447	-0.0538046	0.301625	0.182781	-0.0938382	-0.337438	-0.0326133	-0.137788	0.0814453	0.0480449	-0.175927	-0.351838	0.0524375	-0.174932	0.00946531	-0.0754866	-0.128179	0.0880167
-0.392472	-0.292622	-0.164879	-0.566261	0.278871	0.127176	-0.124148	-0.0656635	-0.197726	-0.0143551	-0.134859	0.259734	-0.00639353	0.129107	0.00779009	0.10912	0.281579	0.226938	0.102785	-0.211147	-0.11637	0.314336	-0.0679069	0.132873	-0.0121413	0.0148718	-0.13808	0.206267	0.22553	-0.295605	0.154848	-0.0586803	0.0372461	-0.107272	0.23313	0.156236	-0.0841079	-0.0767238	-0.0455328	-0.0899883	0.110534	0.0367221	0.200325	-0.0932143	0.0992141	-0.13892	0.172343	-0.0696951	0.394752	0.120116
-0.082799	-0.178872	-0.00982802	-0.482237	-0.1144	-0.122141	0.0128873	-0.0144925	0.136868	-0.143254	-0.162199	0.305969	-0.274388	-0.1687	-0.137661	-0.0711009	-0.0526359	0.0578496	0.206168	0.188421	-0.103546	-0.0925192	0.0444785	-0.274672	0.050296	-0.0817465	-0.151635	-0.264107	-0.111458	-0.386602	0.0977242	-0.184532	-0.143908	-0.128497	-0.105979	0.106822	-0.0568346	0.125544	-0.154961	0.265092	-0.430431	-0.173821	0.147785	0.066758	0.071684	-0.0944203	-0.249063	-0.0766387	-0.0807173	0.0918389
-0.431987	0.0621832	0.265936	-0.470675	-0.114458	-0.0132608	-0.107819	-0.0898037	0.155877	-0.128852	-0.012979	-0.0494543	-0.085876	0.289324	0.13626	-0.180531	0.183049	-0.291028	-0.255072	0.0293388	0.0776477	-0.109806	0.0582058	-0.121856	0.070436	-0.0563399	-0.0115239	-0.0539967	-0.00824617	-0.34622	0.103405	-0.163245	0.0156591	-0.0448337	0.284334	-0.364041	0.010356	-0.00543802	-0.0824569	-0.0631744	-0.497356	-0.122772	-0.258007	0.0993408	0.0931548	-0.0843877	0.214521	-0.0830497	-0.252046	-0.155513
0.287782	0.0972219	0.198939	1.59731	0.0679019	0.231412	0.11413	0.0817634	0.212646	-0.0353203	0.0979708	0.295605	0.310029	0.176359	0.172607	0.278558	0.159976	0.135325	0.210238	0.48997	0.0216457	0.18381	0.138644	0.247781	0.205405	0.165163	0.132886	0.259097	0.327328	1.84799	0.138459	0.0924556	0.129504	0.302658	-0.114622	0.122391	0.0774806	0.153852	-0.101924	-0.000568996	0.128871	-0.109311	0.240557	-0.0852149	0.0418887	0.146927	0.00988848	0.23895	-0.130546	0.17299
0.221379	-0.178582	-0.0772932	-0.470741	-0.135328	-0.285469	0.250094	-0.0986546	-0.0505731	0.114617	0.143033	-0.0871478	-0.0364422	-0.217245	0.241086	-0.232648	0.208335	-0.320329	-0.0694791	-0.270667	-0.0448543	0.00144135	-0.0400414	-0.315452	-0.141827	-0.0227008	0.122126	0.138806	-0.1181	-0.324319	-0.106718	-0.1852	-0.00186124	-0.0615175	0.217235	-0.201909	-0.0312845	-0.275246	-0.166822	-0.146719	0.131054	-0.138092	0.0298491	0.11806	0.0481881	0.0606104	-0.2463	-0.0810297	-0.0966664	0.127047
-0.245682	0.0980297	0.2358	0.769051	-0.106208	0.18747	-0.0784459	0.0684389	0.136864	0.0775583	-0.124839	-0.160558	-0.0637989	0.258502	-0.264587	-0.232766	-0.164754	0.159152	0.162411	0.119488	0.0188121	0.294284	0.133312	-0.220478	0.0262502	-0.0261124	0.0844122	-0.194891	-0.0412387	-0.355792	-0.0644912	-0.108872	0.0757135	-0.0263609	0.078789	-0.4419	-0.0537735	0.225061	0.287586	-0.0171088	-0.40087	-0.0998596	-0.170427	0.107886	-0.258594	-0.0749761	0.20202	0.275862	0.0468265	0.0831984
-0.189476	0.238678	-0.0550419	1.55007	-0.146898	0.26182	-0.0668198	0.077503	0.220663	0.178804	-0.173109	0.243965	0.325701	0.210229	-0.217905	0.299652	-0.178618	0.147863	0.179245	-0.078011	-0.000111958	-0.0605511	0.0944264	0.208711	-0.0996746	-0.0508229	0.104705	0.167025	0.242543	1.99996	0.127818	-0.141582	0.0784797	0.327761	0.0915508	0.0925635	0.0975791	0.331973	-0.0456602	-0.0528433	0.0107139	0.254631	0.127677	-0.0832375	-0.0805559	0.212042	-0.383091	0.202528	0.191507	0.132938
-0.174857	-0.284619	-0.0593368	-0.523219	-0.0492324	-0.318363	0.193904	-0.0823607	0.16392	-0.167665	0.105191	0.218689	0.0945597	-0.129167	0.0909451	-0.0778148	0.172686	-0.394222	-0.349309	-0.0629312	0.295322	0.00968628	-0.248849	-0.0772204	0.281728	0.0910066	0.104099	-0.125266	-0.00180433	-0.321832	0.108434	0.0402172	-0.0887827	-0.147348	0.0784894	-0.0140056	0.0352479	-0.17589	0.150207	-0.0576948	0.119802	-0.22165	0.00109894	0.15229	0.0258637	-0.00462544	0.170909	-0.095657	0.111924	-0.300999
0.250347	0.0203523	-0.0662662	-0.508598	-0.120654	-0.0919797	-0.03483	-0.0667216	-0.24872	0.133436	-0.0571831	-0.036455	-0.213563	-0.233489	-0.127105	-0.184886	0.234624	0.117563	0.0931791	-0.327455	0.240214	-0.0885202	-0.294758	0.12038	-0.145666	0.0156563	-0.018949	-0.104265	-0.0640272	-0.515192	-0.313043	-0.122306	-0.0888495	-0.112058	-0.0187905	0.10657	-0.0991722	-0.2559	0.196851	0.183223	0.0489804	0.219094	-0.150258	0.0965218	0.0205083	0.0695253	0.190538	-0.101134	-0.115757	-0.134151
0.368917	0.219311	-0.185601	1.554	-0.135271	0.255065	0.134649	0.0939745	0.203697	-0.0193403	0.117661	0.258524	0.092012	0.232832	0.122258	0.305399	0.152925	0.125836	-0.0697804	0.0174699	0.0634522	-0.0287258	0.159394	0.28524	0.00225237	0.212396	0.12039	0.263585	0.333398	1.95799	0.137338	-0.106637	0.143926	0.0101939	-0.0999805	0.118256	0.0833922	0.353121	0.191192	-0.0355499	0.0769663	-0.289467	0.142641	0.120928	-0.0283022	0.0328596	0.153982	0.211558	-0.12629	0.144716
0.296985	0.0631009	-0.150208	-0.283885	-0.117348	0.265469	-0.102968	0.110142	0.252317	0.137087	0.00408799	0.26533	0.0250186	-0.200202	0.0870416	0.170719	0.0594836	0.0594789	0.013576	-0.345523	-0.0860445	0.227069	0.15065	0.215465	-0.128966	-0.0623472	-0.0875107	0.311164	0.277603	-0.0531417	0.135511	0.265001	0.0901088	-0.0521827	-0.191447	0.0270595	-0.0292296	0.0882841	-0.0778031	0.222992	0.113768	0.325416	0.221157	-0.14287	0.0702888	-0.0344827	-0.249756	-0.062962	0.435998	0.124952
-0.502452	-0.348375	-0.0520995	-0.323305	-0.0848067	-0.353069	-0.128017	0.119604	0.166585	-0.165101	0.0823227	-0.193317	-0.0298766	-0.199655	-0.224812	-0.254034	-0.335851	-0.387395	-0.378984	-0.023974	-0.110328	-0.0501234	0.309698	-0.021379	-0.0256291	0.295219	-0.126328	0.176284	-0.246417	0.35127	-0.0618588	-0.171413	0.0301545	-0.105864	-0.178825	-0.375674	0.0512041	-0.0119311	-0.181275	-0.0174681	0.0656908	-0.162696	-0.30868	0.0272464	-0.18331	0.0793993	0.121291	-0.0761903	0.216224	0.084347
0.32845	0.284416	0.344303	0.218998	-0.127783	-0.108226	0.19203	-0.143932	-0.193775	0.163016	-0.109987	-0.207546	-0.207663	-0.250512	0.0703565	0.264935	0.230338	0.108759	-0.0462298	-0.262166	-0.136267	-0.105477	-0.301919	-0.212629	-0.0975608	-0.0880261	-0.0637784	0.271772	-0.27345	-0.349724	-0.0937783	-0.120812	0.0395682	-0.0533234	0.00694845	-0.208247	-0.0847097	0.0793861	0.2299	-0.10355	0.0501665	-0.151288	-0.196763	0.0900667	0.0303448	-0.0478357	-0.344057	0.0525135	-0.222012	-0.203839
0.0278733	-0.166531	-0.0720901	-0.309502	0.339412	-0.363792	-0.143282	0.144124	-0.28865	0.12898	0.0871044	-0.198361	0.0670374	-0.132457	0.0302861	0.089515	-0.13449	0.166928	-0.101186	-0.393577	-0.0950658	-0.018992	0.120408	-0.199599	0.0217874	0.285718	0.151737	-0.0440473	-0.4441	-0.386873	-0.117986	-0.208756	0.127477	-0.148862	-0.103947	-0.0760529	-0.0422393	-0.0198985	-0.186063	0.187293	0.0673694	-0.132324	-0.0872865	-0.0834208	-0.259291	0.0915414	-0.0745922	-0.0750966	0.278728	0.10255
0.189822	0.185169	0.198418	-0.219115	-0.10653	0.178452	-0.0817195	-0.10514	0.210337	0.130907	0.136373	-0.132668	-0.108242	-0.10479	0.270323	0.071975	-0.116568	0.14979	-0.0679537	0.426675	0.0374103	-0.0683374	0.210405	-0.0221135	-0.0899982	-0.205373	-0.0695021	-0.133858	0.403553	-0.194916	-0.0884081	0.111083	0.0599917	0.423078	0.0587569	-0.367167	-0.0338551	0.105714	-0.065026	-0.162365	0.0570282	0.218724	0.122132	-0.254766	0.0462148	-0.124036	-0.281292	-0.057974	-0.0884173	0.14358
0.268496	0.0710384	-0.0119644	1.65173	0.335088	0.208837	0.178874	-0.109094	-0.262644	0.147352	0.0981826	0.234219	0.0804225	0.245539	0.19464	0.08603	-0.162835	0.239642	-0.0243457	-0.273956	-0.131155	-0.0960206	0.115421	0.0152588	0.0552137	0.00111312	0.0263135	0.00887005	-0.0623943	0.318019	0.163705	0.223907	0.0663398	0.319239	-0.101539	-0.0775986	-0.0639687	-0.303381	-0.0816304	0.240947	0.131622	0.315064	0.125373	-0.13334	0.0845004	-0.160074	-0.00199413	0.0318886	-0.148002	0.139007
0.0507649	-0.063064	0.197329	-0.371854	-0.0370624	-0.408783	-0.0783794	-0.0592191	-0.210237	-0.226248	0.0906427	-0.256159	-0.0859522	-0.0984073	-0.230286	-0.187008	0.172245	-0.0151143	-0.29043	-0.275145	-0.0970783	0.0203312	0.404641	0.266328	0.0525012	-0.164841	-0.0462203	0.266009	-0.253054	-0.544944	0.108595	-0.12413	0.115519	0.118542	-0.0925081	-0.306455	-0.0373849	0.346855	-0.0281777	-0.0429104	0.096733	-0.153157	-0.383112	-0.0607558	0.0561223	-0.0785484	-0.0178273	0.0463928	0.367231	-0.133419
0.199887	0.0537989	-0.1948	0.0988311	0.0909148	-0.065141	0.159401	-0.075172	0.0721312	0.107896	-0.0770944	-0.274992	-0.0201883	-0.187799	0.0884368	0.210666	-0.217922	-0.405024	-0.0893819	0.0752643	0.0253907	-0.0392576	0.15176	0.0580678	0.292773	0.301664	0.167237	0.268139	-0.0253757	-0.594789	0.00860611	-0.126474	0.223798	-0.0451348	0.224476	0.132154	0.0283532	0.192931	0.246515	-0.0506731	0.10845	0.0505911	0.147174	0.171589	0.0373601	0.0513406	-0.0363953	-0.0676634	0.383888	-0.225002
-0.484607	0.128276	-0.182003	0.458424	0.0706913	-0.123437	0.013903	0.0909006	-0.174739	-0.140139	0.110741	-0.29582	0.400172	-0.112267	-0.0191621	-0.157965	0.0749731	0.115168	0.0679351	-0.100869	-0.0916013	-0.105543	0.0424976	0.0119145	-0.0551923	-0.0142534	0.12391	-0.134899	-0.0304959	-0.642789	0.0998108	-0.208798	-0.0687367	-0.0441968	-0.101949	-0.309693	0.0890872	-0.241377	-0.0692777	-0.219569	0.0979611	-0.102885	-0.313976	0.0631367	0.0745879	6.34255e-05	-0.118118	-0.074138	-0.223442	0.112803
0.13026	0.0334329	-0.0658914	-0.326248	-0.0924551	-0.134097	0.197942	-0.127249	-0.229804	0.0110596	0.0981698	0.30698	-0.00148338	-0.261404	-0.223988	-0.160535	0.132499	-0.164359	0.267504	-0.367572	-0.152025	-0.0956986	-0.309935	-0.247394	-0.0209127	-0.0256435	-0.135132	-0.243756	-0.0168901	-0.621772	-0.251346	0.303014	0.0360002	-0.0710075	-0.133579	-0.0576994	0.0616326	-0.000430958	-0.0334154	0.221445	0.0321726	-0.136351	-0.160464	0.039607	-0.0126704	0.100428	-0.020048	-0.0930107	-0.200223	-0.123015
0.256816	0.211861	-0.0637924	1.61871	0.303799	0.291309	-0.0485445	-0.0954251	0.193535	0.0538088	0.105905	0.263481	0.320558	0.198054	0.101496	-0.00436908	0.110705	0.198412	0.197086	0.292656	0.00963617	-0.00840648	0.313225	0.276503	0.207274	-0.0205639	0.146701	0.267044	0.36993	1.89328	0.142894	0.0833364	0.0865709	0.205136	0.0547462	0.323286	0.105984	0.137358	-0.100312	-0.0439818	0.0326599	0.250346	0.11239	0.0765324	0.0403333	0.0717334	-0.0142567	0.0234898	0.298366	0.171061
-0.402063	-0.149649	-0.0691534	-0.240135	-0.109124	0.4495	0.00913098	-0.0786537	-0.0560684	0.0452796	0.119861	0.00846336	-0.0620031	-0.200713	-0.219327	-0.171539	0.123228	-0.440317	0.0240065	-0.359984	0.0398387	-0.0887202	-0.291115	-0.230679	-0.0209014	-0.0471604	0.0532009	-0.121549	0.143951	0.487626	-0.28399	0.112956	-0.137714	-0.12575	-0.185193	-0.270689	-0.0110367	-0.155708	0.204343	-0.0836566	0.106918	0.26967	-0.205544	0.105828	0.0662312	0.0874089	-0.272623	0.348763	-0.0827413	0.0867175
0.270897	-0.18319	-0.205446	-0.461619	0.0977979	-0.0652748	-0.0830551	0.0791798	0.065757	0.133503	0.064737	-0.0889425	0.204087	0.291898	0.200427	0.0714847	0.191009	-0.101617	-0.134719	0.161663	0.153659	0.247525	-0.257288	-0.0750737	-0.051688	0.254783	-0.0824548	-0.211045	-0.208742	-0.389704	-0.0111491	0.104778	0.150591	-0.139966	0.00457386	-0.30577	0.0657267	0.192847	0.227572	0.199216	0.117889	-0.0630681	0.144396	-0.16881	-0.223188	0.0831054	0.343778	-0.0718675	-0.117462	-0.2325
0.294585	-0.250891	0.196534	-0.392726	-0.154284	-0.222244	-0.116631	0.123003	0.148104	-0.114053	0.00172768	-0.322175	0.0302882	0.216513	0.060233	-0.00878028	-0.172074	0.145278	-0.199554	0.205996	-0.0257779	-0.00380331	0.00969355	-0.178018	-0.153375	-0.0233948	0.0931042	0.277728	-0.0135468	0.26851	0.163183	0.213052	0.054328	0.186268	0.161941	-0.343426	-0.0542064	-0.00660455	-0.195682	0.0204594	-0.154769	-0.252174	-0.117577	0.0615188	-0.1903	-0.0164658	-0.169728	-0.0696943	0.511038	-0.245701
0.0534247	-0.258571	-0.06398	0.334539	-0.14502	0.165024	-0.0281448	-0.072623	-0.132316	-0.280065	-0.0207285	-0.3321	-0.04246	0.233863	-0.198911	-0.0476985	0.206625	-0.199721	-0.0334143	0.440027	-0.101221	-0.0984117	-0.0784473	0.272867	-0.0438544	-0.0579222	-0.0954288	-0.0866926	-0.0699378	-0.605848	0.0662268	-0.198394	0.0759735	-0.115745	-0.0958626	0.084442	-0.106515	-0.251684	0.0401197	-0.175315	-0.415319	-0.161388	-0.185948	0.0520235	0.0366392	-0.165254	-0.376541	-0.0752782	-0.273623	0.0740782
-0.0841658	0.0675181	-0.205948	-0.366786	0.245709	-0.139648	-0.101109	0.0875853	0.187509	0.0831474	-0.178983	-0.0867445	0.0421656	-0.294487	0.0316574	-0.0594038	-0.166989	0.0180383	0.0964883	-0.389268	0.316365	-0.0539984	0.0698412	-0.187159	0.332244	-0.0436044	-0.106351	-0.315107	-0.216854	-0.488407	-0.142128	-0.173229	0.0510047	-0.143442	-0.137037	0.168861	0.0932506	0.310871	-0.177577	-0.0330761	-0.00513025	0.224697	0.0787726	0.111599	-0.198433	-0.19923	0.112779	-0.0809771	-0.151975	-0.211024
0.0233871	0.0365743	-0.105909	-0.466838	-0.106383	0.0535205	0.0360991	-0.0928982	-0.2718	-0.0965435	-0.105204	0.304669	0.0559077	-0.0835696	-0.172943	-0.254023	0.191108	0.0920234	-0.0701727	-0.327178	-0.0319626	0.319521	-0.302158	0.185446	-0.131006	-0.149841	-0.132522	0.196528	0.0740802	-0.648729	0.210899	-0.211552	0.0634338	0.429778	0.168993	-0.0353202	0.00274829	0.0295711	-0.13199	-0.0124352	0.115986	-0.14796	-0.188948	-0.0820716	0.0272712	-0.0484131	-0.0825679	-0.0737972	0.332917	0.0453501
-0.491404	0.29904	-0.0520926	0.974612	-0.146249	0.205826	-0.0942671	-0.0220496	0.150891	-0.0401085	0.130196	-0.348206	-0.0586672	0.161089	-0.245986	0.149248	-0.31707	-0.0079823	-0.339192	0.0328064	0.0321948	-0.0825713	0.333872	0.176721	0.0486823	0.00644102	0.0981164	-0.118553	0.363726	0.0954511	0.141531	0.0297594	-0.117298	0.0135799	0.327599	-0.0771238	-0.101193	0.118658	0.209823	0.148398	0.153991	-0.212257	-0.207106	0.148003	0.0577495	-0.0722298	0.162764	0.0320593	-0.133035	0.0326764
-0.519667	-0.441223	-0.197597	0.42431	0.209521	-0.3514	-0.101167	0.072765	0.15193	-0.0102947	0.0846969	-0.343397	0.190009	0.197275	0.0261619	-0.0290799	-0.309206	-0.451517	-0.359596	-0.167428	-0.127535	-0.0784174	-0.214808	-0.0336193	0.0380311	0.00879086	0.122075	0.182645	0.133346	0.206452	0.0964824	-0.0433361	0.106012	-0.127333	0.295108	-0.155639	0.0997441	0.078921	0.204239	-0.138773	0.0221102	0.186661	-0.359607	0.10589	0.066388	-0.0116079	0.366718	0.0277496	0.409604	-0.225323
-0.272555	0.248328	-0.0951631	0.135686	0.0676138	0.485249	-0.0885608	-0.0773944	0.172815	0.216259	0.148535	0.196901	-0.014927	0.286763	-0.22568	0.385816	0.22893	0.0858393	0.200783	0.187786	-0.124255	-0.0665421	0.0801795	-0.28185	-0.162595	0.0626956	0.10753	-0.36135	0.387465	-0.648797	0.148626	-0.000205055	0.0411227	-0.116923	0.200416	-0.0913918	-0.0587007	0.0544422	-0.203148	-0.0521727	0.0260259	-0.198682	0.0565033	0.0574989	0.0239336	0.136157	-0.187541	-0.0581627	0.0701411	0.135691
0.166967	-0.0673927	0.207806	-0.513807	-0.133848	-0.0983849	-0.0666246	0.129761	0.173399	-0.183374	-0.146312	-0.145333	-0.114609	0.147987	-0.148348	-0.199684	0.210478	-0.111684	0.125227	-0.327699	-0.148444	-0.110805	-0.153639	0.00923578	-0.177012	-0.0226754	0.0958856	-0.109186	-0.310397	-0.575005	0.11665	0.136777	-0.137298	-0.0559931	0.256766	-0.0912666	0.0898636	-0.0122224	0.218676	0.00465479	0.154811	-0.206878	-0.192945	-0.113058	0.0279133	-0.175777	0.20216	-0.0804773	-0.10264	0.0831458
-0.41346	-0.203328	-0.0653894	-0.49589	-0.136854	-0.354109	-0.07296	0.099796	-0.242153	0.129284	0.106146	0.274104	0.319564	0.148538	-0.186981	-0.0610134	-0.328893	0.13602	-0.0759558	-0.0221642	-0.11661	-0.0996011	0.320001	0.151612	-0.186481	0.00181476	0.107108	0.236242	-0.445824	0.13442	0.120012	-0.155162	0.0230243	-0.115254	0.288659	0.187571	0.109109	0.0411365	-0.199001	-0.161089	0.0889646	-0.173627	-0.0707069	0.127342	0.0770663	0.215572	0.183908	-0.0881856	-0.0388981	-0.271852
-0.468704	-0.351344	-0.220806	-0.359687	-0.182732	-0.103421	-0.0980274	0.0422423	-0.182401	-0.140019	0.0997141	-0.27232	0.25432	0.269305	0.0865037	0.134766	0.324869	0.13995	-0.174779	0.0235535	0.0566338	-0.0166597	0.0959718	0.230867	-0.0422498	0.0328644	0.109758	0.112145	-0.108975	-0.335306	-0.082228	-0.192668	0.11054	-0.0625869	-0.111111	-0.308778	-0.0209421	-0.253546	-0.11817	-0.0804768	0.147224	-0.225828	-0.290918	0.0770982	-0.303635	-0.117042	-0.17442	0.0326412	0.275791	0.0983339
-0.195909	0.0771456	0.224874	-0.311375	0.331944	-0.0930925	-0.111551	0.0199297	-0.137781	0.158487	-0.148237	-0.229211	-0.0525379	0.334853	-0.185175	0.0857621	0.266062	0.207827	-0.0674467	0.330091	-0.122039	0.250065	-0.0325909	0.046648	-0.145035	-0.0368696	-0.100302	0.339328	-0.339529	-0.152244	-0.0320787	-0.149839	-0.0833834	-0.114006	-0.150224	0.108591	-0.0895902	0.274364	-0.19355	-0.129597	0.129826	-0.193129	0.166184	-0.102608	0.0328586	0.0105995	-0.0564222	-0.0679428	0.282001	0.131701
0.38108	0.0550231	-0.198425	-0.474023	-0.112396	0.217286	-0.0867588	-0.0933264	-0.048694	0.159812	0.116499	-0.277293	0.0171325	0.290354	-0.232469	-0.154883	-0.249088	-0.0492002	0.0131876	0.00319372	-0.0690694	-0.0813428	0.0549138	-0.182676	0.267497	0.251638	0.106352	-0.23516	-0.363836	-0.595113	0.14539	-0.116313	0.0550772	-0.0858862	0.23593	-0.0613833	-0.0555051	0.231174	-0.0181468	-0.0622224	0.10698	-0.296085	0.107342	0.116307	0.0297265	0.0957841	-0.0516445	-0.0670375	-0.14059	-0.212322
-0.211115	0.345158	-0.210597	-0.405257	-0.149185	0.0518247	0.185501	0.0881642	-0.240064	0.159947	-0.146079	-0.336617	-0.029149	0.234565	0.0283714	0.133543	-0.251433	0.0357223	-0.0833183	0.0291465	0.0143438	-0.0675176	0.161971	-0.167988	0.212856	0.0201011	0.027321	-0.182138	0.0241978	-0.180111	0.192184	0.12514	0.0710413	0.387973	0.0379841	0.218446	-0.0761471	0.173865	0.316312	-0.0410364	0.0970327	0.297595	0.113046	-0.117439	0.0245091	-0.145942	0.159663	0.0423082	-0.226854	0.115224
0.113411	0.139903	-0.2228	-0.471215	-0.134036	-0.325033	-0.096313	0.0891279	0.0874726	-0.0294066	-0.150145	-0.143798	-0.0345681	-0.163612	-0.163126	0.249665	-0.362279	0.117227	-0.178381	0.103403	0.0344255	0.237575	-0.156375	0.0210383	0.0216904	-0.0264791	-0.114663	-0.110502	-0.316311	-0.398764	0.000821759	-0.0308705	-0.10817	-0.120058	-0.20207	0.147473	0.0876312	0.185922	0.0351512	-0.0351026	0.102907	-0.133711	0.2203	-0.280477	-0.183686	0.0526724	0.424787	-0.087087	-0.236931	-0.195032
0.166681	0.268379	0.256662	1.70817	0.0895339	0.181285	0.129884	0.0875537	-0.352624	0.118462	0.117742	0.335513	0.320045	-0.140585	0.256541	0.106479	-0.222269	0.116749	0.226806	0.0972451	0.257518	-0.0777075	-0.0648979	0.285263	0.0241063	-0.0378619	0.104156	0.286252	-0.0056973	1.93043	0.116334	0.183535	-0.0767477	-0.128288	0.0643237	-0.16369	0.0373314	0.343863	0.00605094	0.166882	0.0729415	0.0922279	0.154791	0.100794	0.0916918	-0.0386111	0.144703	-0.0905896	-0.138711	0.151887
-0.0928227	-0.083049	-0.194283	0.487039	-0.111669	-0.138364	0.0171949	0.130038	-0.177573	0.119196	-0.1904	-0.0204529	-0.0463264	0.347052	0.0926016	-0.280567	0.15305	-0.406438	-0.0622229	-0.268686	-0.101536	-0.121299	0.0989626	0.125957	0.0407853	0.124077	-0.0741141	0.203296	0.0143857	-0.630249	-0.0430126	-0.169212	0.0697899	-0.143755	-0.100222	0.148706	-0.0485942	-0.26341	-0.123314	0.228342	0.157512	0.322191	-0.335723	0.115502	0.0359142	0.0959856	0.171478	-0.104624	-0.097656	0.103861
0.106965	0.112334	-0.0825993	-0.422455	-0.124928	0.412224	0.0155457	-0.066395	-0.219331	0.212914	-0.175429	0.270843	-0.0411699	0.215608	-0.113324	-0.288425	-0.197591	0.15075	0.214704	-0.306999	0.34597	-0.0965752	-0.329784	-0.295515	-0.0279489	-0.0541719	-0.0468941	0.258752	-0.0521776	-0.610989	-0.119922	0.0603872	0.0852292	-0.0562455	0.222402	0.178665	-0.0454318	0.122835	0.000161267	-0.0649395	0.111872	0.311944	0.110487	-0.216704	0.0927604	0.0488231	-0.0293755	-0.0823123	-0.082703	0.0596214
-0.408211	-0.15563	-0.0738197	-0.453968	0.314567	-0.0580837	-0.0703031	-0.0452498	-0.076389	0.207176	0.113395	-0.0967184	0.00430104	0.19941	-0.183128	-0.192734	0.185489	-0.0729768	-0.296192	0.00139156	0.0457115	-0.0835304	0.100954	0.216934	0.0304927	-0.0331204	-0.0835696	0.228724	0.221685	-0.592388	-0.0450554	0.137229	0.193817	-0.0679962	0.280397	-0.283385	0.0798894	-0.33776	0.250461	-0.0633525	-0.393988	0.341899	-0.0869885	0.0772498	0.0119134	0.0468044	-0.04617	0.0451864	-0.0634835	-0.220488
-0.0146506	-0.299915	-0.148252	-0.37504	0.207428	-0.440437	-0.109254	0.0669801	-0.142611	0.155908	0.0477998	0.320321	-0.0276595	-0.269119	-0.171695	0.00805747	-0.240971	-0.358669	-0.345738	-0.278722	0.313241	0.247412	0.116169	0.28501	-0.126734	0.252266	-0.145607	0.236743	0.232627	0.887277	0.0731458	-0.17243	-0.0629307	-0.133274	-0.160437	0.212103	0.0945901	-0.0422582	-0.174125	-0.0143033	0.0622639	0.081398	-0.320041	0.0862067	-0.173235	0.0598356	0.319738	-0.0815957	0.0243786	-0.168915
-0.293734	0.195374	0.201902	-0.492267	0.27495	0.145184	0.132918	-0.0770753	0.00610754	0.153963	-0.162931	-0.123739	-0.0771563	-0.213088	0.187981	-0.186152	0.0906412	0.0494779	0.220009	-0.041449	0.0711831	-0.0948438	-0.310765	0.110669	-0.078897	-0.170232	-0.0576297	-0.0818344	0.21531	-0.589474	-0.305253	0.110513	0.101994	0.258689	-0.165269	0.053553	0.075271	-0.293718	0.220793	-0.141165	0.0989543	0.336812	0.141153	-0.0693061	0.0324906	0.055473	0.0869305	-0.0911576	-0.0781708	0.0660836
-0.210201	0.257836	-0.230668	-0.31063	-0.0565213	-0.136822	0.169908	-0.113468	-0.143976	0.167168	-0.187302	-0.074541	-0.114133	0.319169	-0.216538	-0.29572	-0.253855	-0.0136481	-0.0836757	-0.0077468	-0.0429114	-0.0900337	0.0509719	0.0398926	0.026023	-0.0447774	0.136724	0.256621	-0.312747	-0.566444	-0.0692606	-0.230439	0.0424033	-0.0846596	0.0202587	0.122086	0.015422	0.0515217	-0.174989	-0.0957666	-0.0395693	-0.199052	0.112172	0.100788	0.0901323	-0.0058042	-0.0717951	-0.0752677	0.260386	0.0734244
-0.167491	0.0371022	0.201543	0.169051	-0.0451305	-0.141989	-0.0984894	-0.101308	-0.241077	-0.300888	-0.170953	0.019054	-0.0830167	0.255374	0.0895969	0.1062	-0.37347	-0.236711	-0.087511	0.111766	0.0112244	-0.103817	0.308268	0.00429387	-0.145432	-0.0395585	0.0934264	-0.308872	-0.0535279	-0.339724	0.103731	-0.0235235	-0.0939562	-0.0259268	0.187831	0.130651	-0.0850109	-0.0218091	-0.165597	0.192324	0.177319	-0.0907673	0.120519	0.0648675	0.0510666	-0.141996	-0.0658731	-0.0765905	0.40335	-0.221722
-0.15674	-0.185234	0.33843	-0.45538	-0.107685	0.378641	0.0212291	-0.0989523	-0.0294551	0.127847	-0.110733	-0.10602	-0.0799103	-0.140371	-0.0548004	-0.164102	0.177596	0.0768836	-0.123813	-0.0646213	0.0411796	-0.0855376	-0.0612897	0.11099	-0.111479	-0.0349676	0.103917	-0.219101	-0.106885	-0.539354	0.100795	-0.200933	-0.13065	-0.134478	-0.131648	-0.0253308	-0.057369	-0.0276012	-0.0488528	0.17941	0.034091	-0.14445	0.145311	-0.26544	-0.229563	0.0676333	-0.224623	-0.0663644	0.245187	-0.162889
0.274889	-0.095497	-0.0549057	-0.537784	-0.140846	0.106046	0.0301108	0.0966006	0.220218	0.0940303	-0.139252	-0.139909	0.29493	0.190072	-0.127509	0.106786	-0.196289	0.133493	-0.147524	-0.290993	0.00857728	-0.0537166	0.135247	0.127664	0.174666	0.00059245	-0.130183	-0.187776	0.143043	-0.577718	-0.0960477	0.0368451	0.169764	-0.0689504	0.2508	-0.145431	0.0107005	0.0247612	0.208149	0.232806	0.101371	0.273243	0.1353	-0.0566322	0.0359241	-0.0382257	-0.0855776	-0.0879203	-0.125035	-0.318429
-0.167409	0.0443324	-0.0778302	-0.424041	0.211725	-0.0288053	0.0657464	0.0805932	0.18166	-0.0383777	0.116874	0.128419	0.114077	-0.184013	0.0704734	-0.0191195	-0.266283	-0.451763	-0.43972	0.166167	-0.0883327	-0.0389917	0.174028	0.285951	-0.17968	-0.01613	-0.083747	0.386164	-0.298109	0.0543934	0.10957	0.180567	0.113163	-0.0324242	-0.00965498	0.11448	-0.0653222	0.293289	-0.171761	-0.114746	0.101046	0.315889	-0.109156	0.161049	-0.247381	0.075832	0.162601	-0.0689137	0.223715	0.122798
0.0552236	0.0766743	-0.00483964	1.61121	0.0170801	0.225719	-0.062197	0.102403	0.227672	-0.0334015	0.140884	0.246982	0.271726	0.149281	-0.221179	0.295332	-0.365382	0.138636	0.0424586	0.574011	0.021432	-0.0361243	0.186763	0.26973	0.249954	0.165449	0.131679	0.314994	0.259833	1.94826	0.123865	0.0358175	0.107133	-0.0506516	0.200247	0.144732	0.108684	0.304201	-0.0963821	-0.0336104	0.0892304	0.199369	-0.0455474	0.110522	0.0657	0.224883	-0.404111	0.221141	-0.137765	0.168525
0.00347214	0.0446703	-0.0685655	-0.501625	-0.12393	0.312807	0.169095	-0.101567	-0.222052	0.163329	-0.163041	0.00605763	-0.0556839	-0.234349	0.235527	-0.226704	0.268532	0.129709	0.011327	-0.320415	-0.00325138	-0.0586392	-0.409462	0.0612137	-0.0961834	-0.0197411	-0.0933832	-0.14962	0.221309	-0.479373	-0.0886124	0.144564	0.104461	-0.106713	0.213418	-0.061564	0.0295202	-0.016763	0.239553	0.193079	-0.00106957	0.0118664	0.10487	-0.283278	0.0543521	-0.141329	0.109195	-0.0811172	-0.20251	0.10104
-0.321357	0.0379574	-0.0792167	-0.411472	-0.117723	0.421223	-0.0714615	-0.0931164	-0.0602704	0.248286	-0.166927	-0.102604	-0.25182	0.291478	-0.233259	-0.225165	0.136001	0.128849	-0.0266767	-0.202383	0.0271564	0.377587	0.0584121	-0.157246	-0.0797924	-0.0368789	-0.0950454	-0.0648902	0.421545	-0.426589	-0.12142	0.114805	-0.155396	0.0522092	-0.0174098	-0.0593437	0.0850906	0.0114931	-0.00115087	0.17781	0.171294	0.256329	-0.312325	0.070788	0.0674456	-0.0868907	-0.0473402	-0.0607356	-0.0817136	0.0974338
-0.470296	0.0451623	-0.117878	-0.0357617	0.0252743	-0.442856	-0.0375841	0.105702	-0.206092	-0.218729	0.0773588	0.308828	-0.0711236	-0.174851	-0.263919	-0.236672	-0.119361	0.107623	0.238399	0.472591	-0.130494	-0.0988077	0.332474	0.186136	0.019415	0.0154543	0.106679	-0.280277	-0.290834	0.0915387	0.0829992	-0.199366	0.0386858	-0.14638	-0.150569	-0.406307	0.0467975	0.0917201	0.262418	-0.0586164	0.0417256	-0.112857	-0.341206	0.0702086	-0.231329	0.0523369	0.168581	-0.079334	0.246178	0.0766675
-0.581538	0.0535995	-0.0504045	-0.237623	0.0119169	0.409215	-0.0889282	-0.0701148	0.145312	-0.3378	0.00230304	-0.342367	0.344502	0.28178	0.163077	-0.236781	0.153767	0.177212	-0.0686945	-0.251189	0.0409533	-0.07597	-0.250915	0.151957	-0.133906	0.269992	-0.109667	-0.183018	0.268346	0.265142	0.135689	-0.141707	-0.0419864	-0.0801313	-0.114174	-0.365036	0.0612082	0.130143	-0.153274	-0.0371045	0.14318	-0.264655	0.0347513	0.123485	0.0597519	-0.110081	0.103089	0.263043	0.4751	0.102566
0.175941	-0.339078	-0.176524	-0.514581	0.247865	0.0805414	-0.107184	-0.00912277	-0.199738	0.122957	-0.00945607	-0.231116	0.436601	-0.219862	-0.245731	0.0659466	-0.076442	0.0513167	-0.0652408	0.00458093	-0.112572	0.00782416	-0.0269364	-0.0381136	-0.0338369	0.277615	-0.147698	-0.30358	0.217518	-0.578594	0.142116	0.156285	-0.143277	-0.164448	-0.129322	-0.252899	-0.0399191	0.288267	-0.178578	0.212587	-0.208077	-0.184155	-0.25426	0.0659593	0.105862	-0.173082	0.128195	-0.0705267	0.0115249	0.0859293
0.212228	0.185315	0.23226	-0.41502	-0.136561	0.046898	-0.0661622	0.0994117	-0.248619	0.111274	-0.127505	0.136914	0.0128498	-0.217496	0.0712228	-0.205241	0.271077	0.124941	0.17929	0.210899	0.175735	-0.0420303	-0.266952	-0.24142	0.00816958	-0.0241332	-0.117065	-0.110029	0.314208	-0.498711	-0.0516331	0.0175545	0.112389	-0.0517172	-0.125621	-0.258372	-0.00688773	0.326749	0.248498	0.00457565	-0.162316	0.18243	0.157225	-0.228074	0.00928463	-0.0397436	-0.24572	-0.0747174	-0.0879611	0.0820089
0.214712	0.211208	-0.0785689	-0.40914	-0.0143427	0.299463	0.118973	-0.100371	0.142182	0.170438	-0.111437	0.0263105	-0.003562	0.248831	0.0427346	0.152568	0.302891	0.0827363	-0.0694438	0.42486	0.0566207	0.294927	0.126575	0.0801201	-0.14659	-0.191513	0.0983017	-0.36725	0.361044	-0.610515	-0.0906777	0.00925324	0.100326	0.329569	0.00973885	0.213612	-0.101243	-0.327509	-0.129489	-0.231081	0.144324	0.282062	-0.340693	-0.0632467	0.0647727	0.221785	-0.140403	-0.0660463	-0.0641823	0.140741
-0.363751	0.301237	-0.0587164	-0.136998	0.256105	-0.444231	-0.0915327	-0.0946021	-0.0603875	0.0111105	0.0867708	-0.276012	-0.00719406	-0.129245	0.0854784	0.211177	0.0301891	-0.191193	-0.0380795	0.521092	-0.138444	-0.0576762	-0.106768	-0.0506246	-0.106644	-0.0672023	-0.108502	-0.129368	-0.32374	0.169556	0.0932463	0.0161546	0.0314795	-0.138169	-0.144586	0.12116	-0.0372035	-0.0336648	0.297899	-0.169247	0.0922429	-0.166825	0.370959	0.104699	0.00233099	-0.132632	-0.0532538	-0.0778025	0.181607	-0.2335
0.24957	0.231153	-0.0172967	1.65564	0.252742	0.157293	0.0364617	0.0868145	0.21456	-0.00710615	-0.0394454	0.219817	0.0152021	-0.0460526	0.22354	0.060772	0.202267	0.188536	0.227353	0.282945	-0.106327	0.191645	0.436447	-0.0386154	0.0328644	-0.0452583	-0.173878	0.231602	0.256845	0.458086	0.130204	-0.123913	0.197914	0.259241	-0.139539	0.269226	0.0828632	0.263853	0.239502	-0.0537676	0.119638	0.121405	0.201974	0.112366	-0.211715	-0.113476	-0.325411	0.214446	0.162383	-0.225453
-0.384157	0.301874	0.000284259	0.119161	-0.0676859	0.267749	-0.0597336	0.0465997	0.192565	0.183292	0.108763	0.200417	0.246035	0.213787	-0.125318	0.153557	-0.120981	0.121145	-0.152526	0.543376	0.0602397	0.00579284	0.136176	-0.228068	0.141603	0.200916	0.087013	0.277559	0.161074	1.9374	0.142675	0.182916	-0.11929	-0.0217398	0.189571	0.176723	0.103081	0.26329	0.0637427	-0.101876	0.119225	-0.335826	0.191861	0.133527	0.0430057	0.162389	0.299871	-0.00379485	-0.22782	-0.298074
-0.374546	-0.186129	-0.00265207	-0.270812	0.232604	-0.416104	-0.107137	-0.044097	0.250799	0.123674	0.108227	-0.431666	0.273171	0.280574	-0.208173	0.0654138	-0.246707	-0.00957795	-0.216307	0.595127	-0.160762	-0.05582	0.169919	0.14066	0.0586166	0.0747725	0.0777573	-0.0950057	-0.309987	-0.237405	0.132859	-0.155987	0.0348794	0.340775	-0.115355	-0.0795325	-0.0423853	-0.214007	-0.140349	-0.0234515	0.0843884	-0.174832	-0.340442	0.102746	-0.32393	0.0368376	0.128286	0.297695	-0.0562769	-0.220456
0.0690083	0.0301034	-0.173965	1.43234	0.0548146	-0.138167	-0.0437717	0.116296	-0.040822	-0.16438	-0.134755	-0.250215	-0.0471313	0.232152	-0.218967	-0.164265	-0.183051	-0.10696	0.0546931	-0.0184162	0.026301	-0.104567	0.0912736	0.130431	-0.101158	-0.0422679	-0.133022	-0.329199	-0.0528201	-0.643643	-0.0700484	-0.212388	0.025769	-0.0301236	0.225233	-0.270317	0.0608572	-0.0322581	0.0515724	0.19984	0.150285	-0.153326	0.122042	0.0228313	0.0182559	-0.00645382	-0.0725384	-0.095387	-0.253604	0.0866093
0.189718	-0.314898	-0.128989	-0.47486	-0.0410731	-0.0491947	-0.110417	-0.111008	-0.209303	0.127223	-0.115078	-0.0637329	-0.0943267	0.291799	-0.191353	-0.18709	0.284045	0.0250159	-0.0137637	0.0319132	0.0355494	-0.0933303	0.131038	-0.144625	-0.13549	-0.220726	-0.106978	-0.280638	0.212695	-0.28751	0.0995185	-0.178192	-0.176284	0.0705721	0.00261272	-0.00761837	-0.0389084	-0.0346122	-0.191252	-0.0308669	-0.560347	0.324642	-0.140669	-0.0213167	0.105788	-0.146902	-0.00188466	-0.0637453	0.231583	0.0329453
0.251671	0.364292	-0.156485	-0.491551	0.324382	-0.0802387	-0.0860658	-0.0262103	-0.142146	-0.027465	0.130253	0.234054	-0.0374561	0.281153	-0.159999	0.293645	0.262657	-0.041125	-0.0840076	0.3577	0.0452749	-0.0653202	0.0684991	0.00411241	0.177766	-0.0839872	0.071221	-0.126072	-0.26796	0.290517	0.0098941	-0.0061984	-0.125914	-0.139285	-0.0440999	-0.0514991	0.0448463	-0.287081	-0.102172	-0.0755777	0.117396	0.159105	0.343304	-0.0614505	-0.0419671	-0.055645	-0.0124803	-0.0836689	0.148399	-0.208442
0.181179	0.128908	-0.112805	-0.340631	-0.0584613	-0.122171	0.00595833	-0.122776	-0.0468856	-0.170817	0.12023	-0.168673	0.0434309	-0.244079	-0.202506	-0.279021	0.163886	0.113768	-0.0931895	-0.291173	0.0544507	-0.102471	0.420395	0.00211857	-0.127167	-0.0892375	0.00775911	0.210999	-0.212976	-0.600576	-0.260348	0.14589	-0.123423	-0.0323315	-0.111414	0.0774983	-0.0855376	-0.152354	-0.165127	-0.045237	0.0811616	-0.107816	-0.324353	0.0782011	-0.0218383	-0.115567	-0.0882214	-0.0820801	-0.136699	0.0767834
0.0697408	0.0848109	-0.0626514	0.958599	-0.114816	0.42831	-0.0994438	-0.0263701	-0.0400968	-0.108067	-0.17606	-0.0129916	-0.0190739	-0.146989	0.21197	-0.282329	0.229569	-0.36068	0.23064	0.226434	-0.116443	-0.0922469	-0.223869	-0.307279	-0.0631952	0.014601	-0.151538	-0.309856	0.271203	-0.00593792	-0.0840416	0.0416864	0.0148177	-0.0443944	0.211956	-0.106289	-0.0437489	-0.0562228	-0.17258	-0.167883	-0.4188	-0.105191	0.0943148	0.0891974	0.0427715	0.102515	0.118197	-0.0614292	-0.0647399	0.0975536
0.188398	-0.377112	-0.172661	-0.450526	-0.119864	-0.384266	-0.112351	0.0983309	0.102807	0.000106151	0.0684226	0.243153	0.171023	-0.162144	-0.184119	0.209539	0.24199	-0.0756504	-0.437057	0.215238	0.0944961	0.195183	-0.130684	-0.0692247	0.266379	0.249779	0.130006	0.229404	-0.283365	0.904977	-0.209129	0.00786581	0.109201	-0.0947716	0.0426666	-0.329109	0.0768928	-0.16532	-0.059114	-0.115572	0.0367043	-0.0608849	-0.359012	0.0750049	-0.299949	0.042535	0.167507	-0.082219	0.0305858	-0.266389
0.23963	0.20146	-0.175934	-0.391975	-0.137363	-0.324322	-0.0819776	0.104642	0.0889381	-0.0396008	-0.147761	-0.0170254	0.0750978	0.225406	-0.177271	-0.176727	0.247699	0.198547	-0.134745	-0.0793934	0.156025	-0.00901549	-0.385697	0.221173	0.00914922	-0.0295935	0.0999464	-0.120435	-0.0712508	0.345552	-0.0605824	0.00519189	-0.110275	-0.128362	-0.105922	-0.0212351	-0.109323	0.0594919	-0.108519	-0.00495225	0.147464	0.165329	-0.304177	-0.0705232	0.0525206	0.219988	-0.145376	-0.0632507	0.12814	-0.179721
0.167562	0.240417	-0.0489722	-0.268571	-0.13203	-0.100336	0.186051	-0.0808256	-0.314825	0.149417	-0.0149475	-0.262561	-0.106235	-0.248399	-0.0192157	-0.023947	0.213862	0.089075	0.0497695	-0.0394608	-0.121315	0.322294	-0.383282	-0.213294	-0.0404446	-0.0121148	-0.117939	0.258156	0.227371	0.167713	0.182051	0.169209	0.210206	0.379412	-0.13656	-0.0446607	-0.00305733	-0.277952	0.165786	-0.0294629	0.105775	0.0474602	0.426657	-0.169916	0.0383564	0.0255275	-0.00198719	0.0186109	-0.171399	0.0986733
0.168108	-0.147473	-0.0732819	-0.415279	0.089435	-0.0906908	0.00814425	-0.127165	-0.196798	0.0877472	-0.0162312	0.0480637	-0.106628	-0.231426	-0.18626	-0.0175788	0.120364	-0.35705	-0.00817912	-0.387051	-0.146732	0.255402	-0.272273	-0.101414	-0.115868	-0.0270439	0.13609	-0.166072	-0.315307	0.603203	-0.307919	0.0231019	-0.108203	-0.141444	0.0153828	0.118676	-0.0903823	-0.0600973	0.218416	-0.139247	0.0880877	-0.0838293	0.0909271	0.039973	-0.15869	-0.112145	0.183295	-0.0788113	0.216406	-0.208198
-0.475913	0.0370046	-0.00942948	1.54712	0.294348	0.103838	-0.0249736	0.0710637	-0.0344985	0.157933	0.0958605	0.308353	0.0128922	0.207982	0.0486396	0.302119	0.208715	0.160934	-0.0797699	0.522692	0.0657296	-0.0440457	0.112908	0.229851	0.235199	0.194986	0.114765	-0.276181	0.291653	1.91051	0.0801905	0.215745	0.152766	0.264679	0.191602	-0.482922	0.0938452	0.264518	-0.121879	-0.0167882	0.10573	-0.0969568	-0.286009	0.0943863	0.081265	0.188084	-0.158267	-0.0554461	0.20492	-0.241429
0.209889	0.189341	-0.0408141	-0.433276	-0.0754649	0.0960897	0.0379307	-0.0945003	0.192435	0.113194	-0.159143	-0.0984139	-0.0483217	0.0614369	0.0464897	-0.232621	0.235373	0.154013	-0.089325	-0.06786	0.0893393	-0.0848784	0.356267	-0.254329	0.144195	-0.0336139	-0.100592	-0.154444	-0.20379	0.467955	0.195374	0.109773	0.25032	-0.12812	0.0312537	-0.12242	0.0707935	0.283767	-0.133273	0.207218	-0.505213	-0.170072	0.438712	-0.0813374	0.0445322	0.217293	-0.0217741	0.058897	-0.213664	0.103818
0.148433	0.0586791	-0.180305	0.267422	0.027229	-0.106521	-0.0613951	-0.0856995	-0.254153	0.108742	-0.140582	-0.129506	-0.0229975	-0.200271	-0.183887	0.0957467	-0.158049	0.113487	-0.0221833	-0.346799	-0.0697416	-0.0670986	0.0572092	0.149608	0.251334	-0.0366333	-0.153086	0.225937	-0.411706	-0.610035	-0.113293	-0.208633	0.204112	-0.116475	0.253709	-0.0399385	0.0306959	0.332164	-0.0903706	-0.0854824	0.135561	-0.197593	0.10849	0.0781914	0.0805101	0.0626627	-0.0457968	-0.0798601	-0.29061	-0.221958
0.215238	0.213284	-0.0334586	1.51197	0.128007	0.314992	0.169026	0.0690907	0.25176	0.141161	0.147657	0.298515	0.00830317	0.175855	0.125742	0.325905	0.188271	0.169346	0.0963247	-0.0192083	-0.0967426	-0.0448298	0.13824	0.280374	0.0661495	0.0162916	0.13396	-0.0471489	0.274065	1.9096	0.155499	-0.0463501	0.142652	0.284854	0.242799	0.234328	0.0932583	0.052505	-0.106073	0.180056	0.0955432	0.338567	0.119372	0.12301	0.0834367	0.203213	0.122166	0.214492	-0.216577	0.169386
0.207752	0.218308	-0.200448	-0.454221	-0.133504	-0.0814544	0.162705	0.109991	-0.24043	0.122663	0.13151	0.330359	-0.0669333	-0.100274	0.0226482	-0.169739	0.242906	0.102443	0.212868	-0.090805	-0.0948835	-0.0561166	-0.0132695	-0.211389	-0.0722151	-0.028888	-0.0579913	-0.247355	-0.134882	-0.641993	-0.332189	0.155274	-0.144358	0.345034	-0.10239	0.144579	-0.0695304	-0.0573412	-0.11988	-0.204056	0.101031	0.388999	0.0695132	-0.0924965	0.0137657	-0.0950421	-0.111076	-0.0844817	-0.238474	0.106162
0.167592	0.232914	0.0288895	-0.419459	-0.0987834	0.356356	0.15172	-0.0790764	0.0905412	0.195012	-0.0129429	-0.126325	-0.0946068	-0.070012	0.128868	0.140288	-0.208853	0.0907885	0.300574	-0.292796	0.318611	0.295375	-0.321319	-0.166843	-0.118855	-0.0935797	-0.0588971	-0.072281	0.183705	0.117863	-0.137853	0.0633832	-0.142728	0.420072	-0.135027	-0.0427622	-0.0318154	-0.0254801	0.0201883	0.185282	0.0634299	0.128187	0.35474	-0.271442	-0.176277	0.0621731	-0.314085	-0.0644672	-0.184155	-0.215238
0.217131	0.260912	-0.152336	1.41861	0.199826	0.191585	0.115714	0.151903	0.229349	0.0892507	0.0914916	-0.356051	0.276518	-0.0790358	0.0840736	0.332071	0.0821525	-0.537952	-0.0785756	0.580868	-0.064295	-0.0476775	0.304031	0.277293	0.266818	0.238189	-0.189661	0.308262	-0.0468257	2.02896	0.109918	0.140319	0.0606315	0.116789	-0.0709694	0.301174	0.117768	0.0499116	-0.0553197	-0.125395	-0.324352	-0.117294	-0.0236015	0.0623776	0.0487812	0.0559076	0.0105699	0.040031	0.22755	0.148297
0.132698	-0.0636784	0.241464	-0.550251	-0.0630561	0.448149	-0.0381883	0.0226843	-0.218977	0.0956245	-0.00465296	0.198082	-0.0391473	-0.196682	0.158511	-0.212302	0.271478	0.0214684	0.0257625	-0.356006	0.00977522	-0.0120676	0.107849	-0.237013	-0.118296	-0.00178953	-0.0837434	-0.294401	-0.35489	-0.582099	-0.0896268	0.367858	-0.116906	-0.102206	-0.128271	0.068328	-0.0457864	0.019374	-0.199406	-0.167074	0.109378	-0.123429	-0.0901948	-0.0983991	0.0277754	-0.145314	-0.00356797	-0.0801767	-0.107722	0.0883824
-0.0186438	-0.120564	-0.0272269	0.00689353	0.0536696	-0.304738	0.216012	0.111608	-0.175971	0.117686	-0.100194	0.313141	-0.00614169	-0.118719	0.0617613	0.0527934	0.152662	0.0598402	-0.0363725	-0.120287	0.0324649	-0.0764441	0.0881531	-0.217136	-0.143486	-0.177035	0.112812	-0.279422	0.281184	-0.596733	-0.0786217	-0.0985963	0.0831718	0.0344947	-0.144726	0.169763	-0.064531	0.172193	0.0734972	-0.132702	0.0850041	0.114256	0.277921	-0.149547	0.0109213	-0.114112	0.0165393	-0.0841722	-0.130911	-0.151507
-0.184178	-0.206419	-0.0621199	-0.144012	-0.159188	0.494473	-0.122422	-0.089232	-0.311815	0.171553	-0.0650561	0.260647	-0.0502189	-0.170089	-0.187946	0.119389	0.142093	-0.0393994	0.0114258	-0.00546676	0.0355751	0.00307173	-0.0429906	-0.0699699	0.0262117	-0.141926	0.127856	-0.145257	0.313873	-0.470912	0.11553	0.0518007	-0.177447	-0.13157	0.0327051	-0.101624	-0.0491241	0.0260405	-0.10101	-0.0677017	0.179921	0.224381	0.486523	0.069105	0.096963	-0.131454	-0.300651	-0.0674834	-0.0225703	0.12617
0.188628	-0.201845	-0.068139	-0.535453	-0.0314238	-0.0797654	0.244468	-0.093409	0.171169	-0.17705	0.112198	-0.183039	-0.0505913	-0.128302	0.0670521	-0.212216	-0.106919	-0.362968	-0.0933217	-0.290768	0.350619	-0.0550112	0.135845	-0.238997	0.331811	-0.0540524	-0.0277456	0.218336	-0.158404	-0.623571	-0.124343	0.068808	0.171599	-0.137927	-0.00433723	0.0615196	0.0818966	0.0797957	-0.173126	0.184998	0.065464	-0.121431	0.0772544	-0.145966	0.0349097	-0.160597	-0.0268057	-0.0797985	-0.278663	0.0863579
0.252704	-0.281448	0.163975	-0.356131	0.0630376	-0.456333	-0.117309	-0.154151	0.128847	-0.0811935	-0.183689	0.266533	-0.0380833	-0.17482	0.111712	0.0777016	-0.313593	-0.0884461	-0.0183476	-0.440596	-0.110177	0.00319131	0.0934146	0.134528	0.0161405	-0.0542195	0.0398237	-0.195615	-0.299126	-0.406932	-0.0220737	0.0263411	-0.043205	-0.119873	-0.159555	0.232237	0.0905095	-0.212077	-0.109461	-0.13903	-0.396238	0.124535	-0.229152	0.125938	-0.179985	-0.178965	0.152348	-0.0760245	0.262863	0.0872896
0.208276	0.026673	-0.0564127	-0.46389	-0.115339	-0.0646719	-0.114226	0.158565	-0.198998	-0.145389	-0.173941	0.306726	-0.0206553	0.274619	0.0778839	-0.231993	0.318326	-0.415747	0.00595163	-0.0268134	0.0543169	-0.0420097	0.174907	-0.0157331	0.0487974	0.302459	-0.137876	-0.0152465	-0.323597	-0.172473	-0.0345223	-0.19392	0.0704504	-0.134142	0.209186	0.0798345	-0.00558782	0.0813283	0.245	-0.179416	0.0872273	0.2856	-0.133951	0.128232	0.0116479	0.052922	0.210192	-0.0811683	0.0185371	-0.173043
-0.147738	0.0182627	-0.0541307	-0.471668	-0.0698361	-0.111291	-0.0933234	0.0503101	-0.295137	0.141078	0.152939	0.0621976	-0.102482	-0.212906	0.0817033	0.268484	-0.26244	-0.435659	-0.0960302	0.40636	-0.111873	0.0180659	-0.318865	-0.22141	-0.0216393	-0.0208032	0.0341507	-0.150165	-0.0104951	0.347444	0.133945	0.290754	-0.0884064	0.367828	0.142254	0.172688	-0.0971179	0.00237916	0.0141224	0.135891	0.0625993	-0.131348	0.0797984	-0.159306	0.0578977	0.0678749	-0.301706	-0.0813977	-0.0897576	-0.213763
0.0162097	-0.24806	-0.0507869	0.446774	0.0892793	-0.111646	-0.114152	-0.111395	0.196855	-0.130238	0.122226	-0.208883	0.288979	-0.216328	-0.0718738	0.267633	-0.216894	0.0124041	-0.144423	-0.367686	-0.0728272	-0.054245	0.038657	0.193404	-0.157625	0.0573554	0.0969541	0.230016	-0.399323	-0.117312	0.00339876	-0.244157	0.147502	-0.200951	-0.18227	-0.380272	-0.0717006	0.238696	-0.19181	-0.206947	0.0194756	-0.0899328	-0.372934	0.1092	-0.226548	0.228977	-0.0719496	-0.0810483	-0.227589	0.13818
-0.438856	0.359379	-0.0421855	-0.459546	-0.0805457	-0.0729733	0.0195449	0.0782915	-0.187795	-0.279471	0.0821192	0.104694	-0.200317	0.275052	0.0717233	0.134404	-0.151172	-0.433936	-0.381145	0.419356	-0.0777363	-0.0174949	-0.144062	-0.213892	0.245716	-0.0222304	-0.117151	0.249125	-0.270509	-0.650078	0.112996	-0.228067	0.094868	-0.0722458	0.136077	-0.356694	0.0669332	-0.00404562	-0.117515	-0.049052	0.111881	-0.255617	-0.0551937	0.0502327	0.0276812	0.0728608	-0.0415052	0.0390679	0.239246	-0.190279
0.169951	0.0585105	-0.0926386	-0.471412	-0.126532	-0.0872425	-0.113935	-0.125656	0.18104	0.0176351	-0.170928	0.250422	0.0355679	-0.185507	-0.107618	-0.322799	0.156446	0.0993912	0.116832	-0.424866	-0.106193	-0.0864287	-0.220297	0.0261111	-0.11144	-0.230483	-0.0823443	0.238163	0.297839	-0.612113	-0.315017	0.357016	-0.101592	-0.14739	0.186773	0.159635	0.117502	0.141715	-0.107363	-0.0230818	0.0813345	0.314724	0.0902351	-0.074305	0.0248781	-0.0270676	-0.0732107	-0.0720194	-0.0854396	-0.271722
0.174581	-0.10353	0.108242	0.0422752	0.250749	0.204241	0.142041	-0.0440695	-0.00552168	0.0998977	0.0115795	0.251523	-0.0969049	-0.240035	-0.162052	-0.274204	0.21	0.0736215	-0.372358	-0.29867	0.303807	-0.0237923	0.14104	0.302469	-0.163994	-0.0212013	0.122699	0.210021	0.219617	1.1696	0.13208	0.100699	-0.0662476	-0.0260386	0.292051	0.157456	-0.0630833	0.354619	0.206321	0.142013	0.109417	-0.07173	-0.362018	-0.0748499	0.0207077	0.0498692	0.205612	-0.0649638	0.143711	-0.202172
-0.354974	0.0713593	0.26406	0.196632	0.00288437	0.227281	-0.0525927	-0.127056	0.144557	0.148574	-0.117887	-0.150696	-0.0699954	-0.0953	0.0687465	-0.238048	0.00661496	-0.095859	0.0154826	-0.342351	0.0262591	0.353961	-0.164383	0.0261171	0.263069	-0.0564029	-0.144489	-0.105143	-0.0584204	-0.434155	-0.115259	0.0807098	-0.113265	0.136399	0.188917	-0.109479	-0.0854976	0.0438161	-0.146235	-0.168675	0.0904853	0.0706907	-0.343403	0.0790437	0.0151473	0.0821518	0.0519733	0.0487239	0.304248	0.0909226
0.246891	-0.165593	-0.127786	-0.317207	0.303506	-0.140868	0.171872	0.120977	-0.277874	-0.104945	-0.146915	-0.116353	-0.0307918	-0.139786	0.0514641	-0.225721	0.0916418	0.210979	0.0263623	0.601271	-0.028691	-0.0733698	0.071676	-0.309372	0.0355341	-0.225875	0.0144864	-0.113026	0.0332358	-0.41586	-0.0722852	-0.00104483	-0.105129	-0.0896797	0.0610748	-0.322655	0.062234	-0.0477898	-0.180932	-0.170091	0.119245	-0.130303	0.0618326	-0.321663	0.0965391	-0.14913	-0.049586	-0.0823264	0.112451	0.0706117
0.199	-0.0947713	-0.0435247	-0.51464	0.039437	0.451279	0.153364	0.0098054	-0.252262	0.177969	0.152907	0.285777	-0.193824	-0.280464	0.0526031	0.293674	-0.0136273	-0.40193	-0.0935545	-0.280941	-0.124595	-0.0818795	-0.175095	0.100859	-0.051236	-0.0882355	-0.15582	-0.26385	0.320737	-0.532192	0.188771	-0.226451	0.0364182	0.415446	0.0588114	-0.196028	0.0422208	0.102411	0.017367	-0.0324641	0.10859	-0.0801553	0.0282657	-0.0215205	0.0118038	-0.115036	-0.00259217	-0.0619911	-0.0866648	0.10217
-0.210568	0.0429654	-0.171305	0.243031	0.0113314	0.36781	-0.0253741	-0.136468	-0.0726152	-0.251002	-0.0935436	-0.301988	0.0564015	0.238909	-0.227419	0.29623	-0.397066	0.149349	0.0171459	-0.00868452	-0.0744803	0.252935	0.132417	0.12991	0.0682711	-0.00109348	0.0596475	0.239922	-0.361529	-0.38179	-0.0624596	-0.202687	0.133588	-0.101542	0.0267613	-0.396699	0.0623227	0.211123	-0.175894	-0.174728	0.0717743	-0.328717	0.116388	-0.0533434	0.0927129	-0.0264938	0.194659	-0.0806368	-0.0760924	-0.238039
-0.179137	0.18512	0.17558	-0.472971	-0.16186	0.408638	-0.0390637	-0.11303	-0.218006	-0.137759	-0.099595	0.137325	-0.0307838	-0.175957	-0.120165	-0.231385	0.242645	0.139376	0.227417	-0.138979	0.0403992	-0.0344023	-0.33019	-0.00633935	-0.125743	-0.1644	0.0474771	-0.277503	0.190667	-0.607915	-0.297503	0.095934	-0.135086	-0.0108362	-0.0818753	0.150712	-0.0691845	-0.0124608	0.259524	0.206541	0.147347	-0.109987	-0.125331	-0.112605	0.0116615	0.0347662	-0.17577	-0.0890195	-0.070802	0.0680468
0.170936	-0.247056	0.252478	-0.501892	-0.099321	-0.0752497	0.182213	0.0283151	-0.0834936	-0.352038	-0.0114161	0.175731	-0.266766	0.28643	0.278251	0.106689	0.18269	0.0919095	-0.041447	-0.295259	0.302707	0.276074	-0.0369413	-0.166066	0.0657642	-0.00320318	0.117756	0.256604	0.374976	-0.603692	0.103411	-0.0965165	-0.116312	-0.0791995	0.214636	0.177398	-0.114387	-0.390451	0.150056	-0.0349267	0.171417	-0.0479105	0.0544533	0.0881832	0.0427699	0.0302054	-0.0648841	-0.0773998	-0.124716	-0.25158
0.343539	0.210048	0.171064	0.00517974	-0.124153	-0.129971	-0.0999699	-0.122746	0.105927	-0.290947	0.00254992	0.102327	-0.271492	-0.20787	-0.150484	-0.331929	0.11204	0.0875123	0.0134739	-0.405081	-0.143521	-0.0555414	-0.344663	-0.0695038	-0.164601	-0.0338125	-0.0940421	0.267195	-0.0573537	1.27345	0.000606344	-0.16525	-0.144037	-0.0668126	0.269941	0.143589	0.0965637	-0.0521448	0.167904	-0.0124436	0.0507743	0.277585	-0.167688	-0.097738	0.0131296	-0.113257	-0.0877108	-0.0897638	-0.0921123	-0.248582
0.214934	0.0900972	-0.051531	1.52868	0.311234	0.292316	-0.0365038	-0.101525	0.0174124	-0.121828	0.152031	0.332439	0.309368	0.228179	0.0447332	0.236295	0.191495	0.244423	0.160894	0.386213	-0.0695437	-0.0398093	0.309321	0.272107	0.0837847	-0.225479	0.135507	0.239305	0.185783	1.82554	0.149902	0.0988018	0.115335	0.215561	-0.118426	0.32522	0.0897478	0.365734	0.00251716	0.199733	0.0607792	0.225566	0.024978	0.0980315	0.0706429	0.15365	0.148457	0.216149	0.251158	0.170004
-0.441905	-0.0483497	0.45427	0.0383495	-0.0700064	0.429547	-0.0475757	0.114229	0.0332436	-0.1761	-0.0161221	-0.10066	-0.0773832	0.245723	-0.188078	-0.183606	0.0229336	0.0100654	0.181944	0.326633	-0.0685721	0.355157	0.0485256	0.149237	0.038181	-0.182641	0.0991205	0.212307	-0.129249	-0.565713	0.098374	-0.170429	-0.112487	-0.0552043	-0.0989268	0.0643293	-0.0420825	-0.313221	0.0137373	-0.0689731	0.0840516	-0.107901	0.10612	-0.111971	0.10523	0.112305	-0.406351	0.0693515	-0.116882	0.137137
-0.465323	0.223844	0.19569	0.220239	0.370871	-0.0805392	-0.0711267	-0.1501	0.129239	-0.0112572	-0.124004	-0.0827622	0.0563363	-0.14842	-0.147182	-0.241261	0.287705	0.204856	0.118935	-0.0580615	0.0657505	-0.0999793	0.0694081	0.0396204	-0.00493977	-0.0321967	0.100141	-0.0877332	-0.328963	-0.345251	-0.0854483	0.121485	-0.161762	-0.0332091	0.063612	-0.363944	0.0746901	0.130987	0.282896	-0.0495682	-0.425043	-0.139001	0.166859	-0.0278021	-0.233944	0.0908501	0.134254	-0.0772754	-0.105511	0.114613
-0.0994045	0.158047	-0.161033	-0.481081	-0.100597	-0.10139	-0.0657013	-0.0394572	0.102501	0.136853	0.0759013	-0.281847	-0.0626303	-0.232697	-0.157972	0.224292	-0.292041	-0.439746	-0.273202	-0.302454	0.0505804	0.22064	0.114758	0.112051	0.346787	-0.020171	0.0838046	-0.0954446	-0.324351	-0.55707	-0.100832	0.34129	0.0289247	-0.136438	-0.184589	0.129755	0.00644837	-0.0184575	-0.156361	-0.046452	0.0471512	-0.129939	0.0901094	0.0756444	0.0459777	0.059093	0.154201	-0.0785171	-0.136288	-0.220062
-0.0103733	0.181787	-0.072749	-0.404133	0.0188659	-0.0672853	-0.0714373	-0.109887	0.163917	0.134045	-0.192338	-0.320032	-0.00827212	-0.299017	0.0920053	0.248273	0.210379	0.105347	-0.0175412	-0.425203	0.00914782	0.011981	0.104445	0.278013	-0.153211	-0.0440354	-0.113903	-0.229937	-0.0724939	-0.575125	-0.0993408	-0.189435	-0.0104712	0.385698	-0.101794	0.0983709	-0.0716035	0.342251	-0.204066	-0.164774	0.0973598	0.0871513	-0.139375	-0.121069	0.0207183	-0.14448	-0.321296	-0.0682909	-0.268986	-0.232927
0.0556519	-0.18446	0.347917	-0.340686	-0.11616	-0.12307	-0.0987482	-0.0401952	0.178252	0.199594	-0.154581	-0.30141	0.0262642	0.177973	-0.153325	0.0613398	-0.305807	0.103838	-0.299209	0.0345989	-0.0920743	-0.0596598	0.144643	0.241494	-0.117538	-0.0362514	-0.107618	0.297045	0.387336	-0.539827	0.0562651	0.444046	0.0788908	-0.098984	0.0457063	-0.092041	0.0856086	0.0951405	-0.201784	0.0296374	-0.392302	-0.316497	-0.32908	0.116027	0.0754112	0.217551	-0.281907	-0.0597072	-0.0891591	-0.273692
0.0477148	-0.0802201	-0.0295235	-0.0503105	0.00824585	-0.35676	-0.0512386	0.142639	0.244229	0.0988605	-0.126904	0.213369	0.027747	-0.23706	0.102607	-0.0694555	0.33623	0.196324	0.258698	0.157843	-0.0334792	0.0617995	0.33231	0.262594	0.0207649	-0.0449739	-0.0324534	-0.352796	-0.297513	-0.540938	-0.0622859	-0.208722	-0.0751874	-0.127915	0.0465605	0.19773	-0.0949645	-0.0574671	-0.174331	0.197494	0.098115	-0.125087	-0.33175	0.0681832	0.0699193	-0.0357423	0.150565	-0.0789084	-0.246171	0.105288
-0.352305	0.208605	-0.217526	-0.484009	-0.145816	0.430791	-0.0360558	-0.0955164	-0.0973899	-0.034044	-0.161869	-0.120151	-0.0684396	0.188756	-0.172606	-0.150481	0.218357	0.00781631	0.0780034	-0.154551	-0.114131	-0.101972	0.108792	0.125742	0.00567956	-0.196465	-0.0993035	-0.245981	-0.105071	-0.610007	-0.0803889	-0.179083	-0.155904	0.360471	-0.122018	-0.0576274	-0.023698	-0.264143	0.2376	-0.10968	-0.467073	-0.105327	0.0982356	-0.256264	0.0649534	-0.171808	-0.302143	-0.0733723	-0.110969	0.0780063
-0.185489	0.129136	-0.129907	-0.507839	-0.131747	0.141122	-0.0549296	0.0848459	0.0260721	-0.172523	-0.154616	0.335851	-0.0430275	-0.221332	0.0193232	-0.042786	0.127488	0.156286	0.239053	-0.412248	0.235777	0.339369	0.086826	0.28401	-0.17362	-0.0787505	0.0650949	-0.344023	0.199977	-0.347622	-0.0814378	0.0452311	-0.155316	-0.124894	-0.165476	0.0735115	-0.0570068	-0.0122739	-0.181561	-0.0728437	0.161504	0.269046	0.0878665	-0.0661816	0.0448608	-0.138311	0.363649	-0.0690112	-0.11662	-0.209091
0.188231	0.187192	-0.0801038	-0.424912	-0.143949	0.393739	-0.0394663	0.133459	0.234616	0.148491	0.160366	-0.240722	-0.29885	-0.0843142	0.0665044	-0.249636	0.0943804	0.13538	-0.0147026	-0.354535	-0.0623708	-0.0752595	-0.0416395	0.0180995	-0.0420674	0.0389691	0.100992	0.295961	0.0740784	-0.626501	0.124889	0.191149	-0.193924	-0.117292	0.262055	0.174773	-0.0774443	-0.0188272	0.203329	-0.217481	-0.472304	0.0863012	0.108705	-0.118604	-0.00252599	-0.115197	0.147015	-0.078771	-0.231253	0.147166
-0.18901	0.0691045	-0.0600576	-0.509461	-0.114555	0.339536	-0.0616176	0.101227	-0.0592587	0.176333	-0.117006	0.368853	-0.161274	-0.210476	0.0115527	-0.24336	0.150838	0.168027	-0.02279	0.486057	0.137399	0.324285	0.060049	-0.303924	-0.130781	-0.198035	0.0207705	0.222657	0.223032	-0.0886673	-0.0112762	-0.164162	-0.0974965	-0.118732	0.0421461	-0.0954444	0.0399308	0.0300639	-0.00487054	-0.220996	0.0941868	0.32481	0.0825609	-0.048057	0.0509825	-0.157061	0.15069	-0.0819303	-0.169055	0.114314
-0.121002	0.0994875	-0.0220659	-0.281293	-0.0556928	-0.139566	-0.00691257	-0.031103	0.143497	-0.0982597	0.106804	-0.117475	-0.107813	-0.0180898	0.0668666	-0.260796	-0.090479	0.0362797	-0.0684469	0.239918	-0.10072	-0.000786326	0.0692447	-0.223757	0.333265	-0.0563893	0.140409	0.220522	-0.0553078	-0.601309	-0.0680594	0.0493544	0.0472963	-0.048664	-0.147791	0.0934408	-0.00548935	-0.355119	0.2654	-0.0418032	0.0820606	-0.127619	-0.123297	0.162852	0.0816	-0.0873856	-0.189991	-0.0699357	0.42097	-0.12707
0.238675	0.205501	-0.215954	1.59668	0.332963	-0.0120217	0.100709	0.0748742	0.214261	0.141083	-0.0957745	0.317829	0.308365	0.272768	0.037223	0.373727	0.189115	0.230804	0.125854	0.420536	0.177965	0.164286	0.179608	0.237952	0.173206	-0.00536334	0.156223	0.259699	0.190793	1.93727	0.140659	-0.0169112	0.12121	-0.0497332	-0.169582	-0.00847343	0.0426701	0.317448	-0.123768	-0.0413421	0.13254	-0.083272	0.119827	-0.0509283	0.0779361	0.149502	0.201858	0.193698	0.402474	0.125606
0.218442	-0.082305	-0.0377536	-0.572116	-0.130481	0.0685347	-0.094609	-0.142645	0.195022	0.114806	-0.170605	-0.363501	-0.0898771	-0.172812	-0.153679	-0.133055	0.190786	-0.109074	-0.0555319	-0.402961	0.0982419	-0.0533298	0.0623291	0.105854	-0.154285	-0.0344018	0.102793	-0.164642	-0.189046	-0.120711	-0.0918604	0.140729	0.0258061	-0.138879	-0.0146975	0.135131	0.131252	0.0347469	-0.148736	0.149236	-0.392367	-0.154622	-0.212322	0.029573	-0.147944	-0.157598	0.158992	-0.0839342	-0.190457	0.0902452
0.285027	0.170899	-0.068355	-0.481235	-0.0872614	-0.0710715	0.181139	-0.0969421	-0.105621	-0.0330893	0.170013	0.197257	-0.0696558	-0.234271	0.105408	0.160927	-0.264649	0.0843099	-0.0436153	-0.0263192	-0.140069	-0.0610536	-0.0846398	-0.0678795	-0.124078	-0.0358838	-0.0855129	0.237312	-0.0264817	-0.667602	0.0826905	0.214577	-0.115892	-0.127528	0.055135	0.0609628	-0.0903622	0.350898	-0.143078	-0.186068	0.0754195	-0.177352	-0.299677	-0.310487	0.0327433	0.031937	0.195943	-0.0916067	-0.0644533	-0.197203
0.0192714	-0.153147	-0.0619572	-0.4512	-0.148088	0.128259	0.196361	0.136502	-0.00231865	-0.261331	0.106521	0.00308597	-0.0273045	-0.0723694	-0.184767	-0.211074	-0.321684	0.00945355	0.0944655	-0.372739	-0.0893608	-0.0738015	-0.21597	0.0225196	-0.101667	-0.0355184	0.0874712	-0.353667	-0.351213	-0.10781	-0.0986017	-0.170642	-0.108617	-0.0109348	0.252833	-0.108352	-0.0701541	0.0572572	0.216503	0.237589	0.0797817	0.144039	-0.0893884	0.109244	-0.190089	-0.0242431	-0.268946	-0.083474	-0.110822	0.134076
-0.457265	0.197226	-0.165187	0.249306	-0.0431758	-0.435001	0.140813	0.0700353	0.147044	0.0638156	-0.112695	0.307428	0.052543	-0.08326	-0.0906296	0.0462369	-0.242573	0.0596855	-0.309102	0.169923	-0.119824	-0.0999972	0.338191	0.201518	-0.137672	-0.0370558	0.0900888	-0.323761	-0.307553	0.51261	0.0678671	-0.180895	-0.0912966	-0.107001	-0.139001	0.186337	0.105286	0.0146703	-0.102367	-0.153091	-0.328577	-0.220501	0.0343613	-0.152721	0.0468776	0.222693	-0.0181429	-0.0818089	-0.217377	-0.190588
0.21792	0.0766989	-0.152499	-0.449227	-0.141157	-0.0975715	0.133471	0.0744405	0.141688	0.043665	0.102729	0.116362	-0.286573	-0.247744	-0.00938329	-0.236478	0.24604	0.148417	0.199732	-0.358478	-0.156389	-0.0891016	-0.342544	-0.00525852	-0.180311	-0.0416016	0.0111594	0.200191	0.168329	-0.617838	0.141925	-0.0317254	-0.128008	0.0140307	-0.193976	-0.0553153	0.041952	-0.283869	0.185869	0.141622	0.0908045	-0.0788564	0.416008	-0.0983414	0.125967	-0.171383	0.200691	-0.0896942	0.0154171	-0.156736
0.199799	0.0470306	0.23647	1.67608	0.29085	0.314821	-0.0558891	0.0912697	0.189072	0.133364	0.130805	0.199644	-0.0418631	-0.249061	0.164504	0.16155	-0.00839152	0.179064	0.261706	-0.341365	0.266055	-0.0244458	0.159899	0.296436	0.0707662	0.0164934	0.0798029	0.313584	0.215572	1.92939	0.0104751	0.236354	-0.0712942	-0.0485707	0.062509	0.283335	0.0780392	0.370883	-0.0669005	0.136863	0.129157	0.1119	0.134393	-0.332965	0.0526382	0.0725221	0.146047	0.257161	-0.0842169	0.145203
-0.156467	0.0492306	-0.0526798	-0.458242	-0.126731	0.418693	-0.0643519	0.0113575	0.0953315	0.144096	-0.0130493	-0.153777	-0.0295407	-0.0759257	0.165561	-0.209676	-0.17315	0.117996	-0.0780328	-0.231244	0.0190143	0.318239	0.0289457	-0.0261746	0.010872	4.69193e-05	0.122608	-0.146169	-0.0904059	0.00714411	-0.129077	0.0421058	0.058363	-0.0782567	-0.0115477	-0.276371	-0.0549859	0.0373887	0.0972119	-0.0182189	0.0784681	-0.0782959	0.121753	-0.342431	0.0509915	0.0782655	0.141118	-0.0758311	-0.233312	0.105262
-0.361358	0.0298157	-0.0423023	-0.127254	0.321643	-0.128036	-0.1264	0.106771	0.116131	0.194161	0.105805	-0.265173	-0.0551454	0.305118	-0.230951	-0.0368654	0.0204653	0.0602237	0.182079	-0.0410324	-0.0804265	-0.0886604	-0.150309	-0.28754	0.0379509	-0.0321084	-0.0990477	-0.241982	-0.0935047	-0.344419	-0.0720417	-0.00161054	0.069174	-0.0484205	0.225331	-0.0850171	-0.0557457	0.0517052	0.049488	-0.184425	0.0962958	0.242812	-0.100126	0.0902977	0.0382277	-0.138999	0.00457686	-0.0825082	-0.212738	0.11455
0.230909	0.0272967	0.443289	0.476284	-0.127922	-0.143769	-0.07858	0.101879	-0.10064	0.115434	-0.136297	-0.300133	-0.0203288	-0.244629	-0.187977	0.158652	0.217736	0.162844	-0.00929329	-0.265718	0.0685398	-0.0842214	-0.176575	0.00363704	-0.101884	-0.040845	-0.05837	-0.31324	-0.0602328	-0.55239	0.125027	0.143052	-0.137163	0.349531	0.0248665	0.166936	-0.0709021	-0.330568	-0.00427114	-0.122573	0.111645	-0.0961073	0.136512	-0.236044	-0.195045	-0.0806724	-0.321805	-0.0782523	0.279711	0.113585
-0.35946	-0.167472	-0.146492	-0.346098	-0.103827	-0.354025	-0.125918	0.00356107	0.236776	0.0184159	0.106957	0.388281	-0.0255868	-0.202226	-0.203538	0.267043	-0.217004	-0.365921	-0.150818	0.107137	0.00708158	0.344325	-0.0824671	0.234517	-0.177225	-0.0451793	0.0823865	-0.237882	-0.255375	0.444652	-0.00469226	-0.174339	-0.0969132	-0.120556	-0.19208	-0.0469076	0.01867	-0.275566	-0.179971	-0.0866113	0.125444	0.150693	0.0838595	0.0995433	-0.190898	-0.131966	0.37118	-0.0781101	0.0794529	-0.218536
-0.241786	0.034108	-0.176443	0.502795	-0.140939	-0.296825	-0.0777261	0.112005	0.107623	-0.111468	0.013286	-0.362992	0.0503767	0.227777	-0.2711	0.0569412	-0.36181	-0.418956	-0.332063	0.386784	-0.109983	-0.062405	0.0374497	0.00426205	0.0423952	-0.041569	0.0778404	-0.115319	-0.32282	-0.430157	0.0950504	-0.193547	0.0890278	-0.143177	-0.110638	-0.496025	0.0683859	-0.0599512	-0.17974	-0.0425634	0.03982	-0.297461	0.0205861	0.114414	-0.224838	-0.193964	-0.112917	-0.0726223	0.266503	-0.180375
0.2795	0.0499656	-0.171025	0.533245	0.245598	0.364033	0.145135	0.109597	0.255218	-0.150715	0.104394	0.307623	0.243224	0.0961749	0.171968	0.301771	0.0483486	-0.161169	0.193069	0.561303	-0.0666103	-0.0273748	0.10825	0.241238	0.0698017	0.0139945	0.0467718	0.271772	-0.0293552	1.57104	0.141838	0.144943	0.167668	-0.115136	0.146537	-0.0322458	0.0546941	0.281501	-0.102086	-0.0326428	0.133168	0.234015	0.248971	0.0996567	0.0872985	0.0814519	0.312948	0.0526468	0.358025	0.158959
-0.474329	0.266463	0.14856	1.56674	0.26497	-0.0600823	-0.0642549	0.125952	0.22036	-0.112262	-0.158504	-0.427887	0.261583	0.243836	0.0303868	0.298217	-0.12182	0.230598	0.275767	0.524152	0.0277295	-0.0697796	0.32581	0.168627	0.0833162	0.0452992	0.106874	-0.0715383	-0.0221242	-0.212177	0.115828	-0.113905	0.116326	0.296018	0.0504362	0.239949	0.130046	0.290984	-0.136297	-0.163944	0.078751	-0.172362	-0.15918	0.118837	-0.31583	0.109115	0.173883	0.0483415	0.31287	-0.247871
0.261421	0.0873545	-0.0679038	-0.389807	-0.125458	-0.0692244	-0.0677347	0.130045	0.164824	-0.0841769	0.0956415	-0.319816	0.0772352	0.250751	0.284007	-0.0554788	0.315697	0.103617	-0.0104993	0.555135	0.131572	-0.0840988	0.202384	0.114536	-0.131071	-0.079884	-0.0872356	-0.204234	-0.105877	-0.550098	-0.170641	0.0522145	0.0491067	-0.101638	-0.0521901	-0.0964177	0.0168838	-0.0414147	-0.134208	-0.169116	-0.177315	0.302884	0.0498568	-0.10495	0.075966	-0.159985	-0.136939	-0.0776023	0.0166082	0.113508
0.214084	0.260119	-0.0902504	-0.486853	-0.140719	0.426584	-0.0277121	-0.0761028	-0.0456516	0.159662	-0.164991	-0.1237	-0.208087	0.229716	-0.181162	0.0733603	0.24925	-0.0981748	-0.032206	-0.0747203	0.0658493	-0.105027	-0.111769	0.195458	0.0398204	-0.200452	0.119992	-0.164459	0.454061	-0.575665	-0.104243	0.331184	0.0836787	0.374179	-0.0610981	-0.040869	-0.0603335	-0.297318	-0.133817	-0.0424342	0.130438	-0.116615	0.0867466	0.0575313	0.0577585	-0.132706	-0.304113	-0.0753184	-0.231497	0.118683
-0.0675903	-0.195503	-0.017627	-0.506179	-0.141175	-0.105769	0.174586	-0.0158199	-0.320651	0.129648	-0.143175	-0.108291	-0.358687	-0.161819	0.0873778	0.0211215	0.0792708	0.0253089	-0.085629	0.16736	0.338659	-0.0700481	-0.110858	-0.0630407	-0.00713378	-0.0232081	0.0703447	-0.199641	0.347958	-0.349392	0.0806003	0.152522	-0.146792	-0.043569	0.250353	0.167971	-0.0736074	-0.364452	-0.0659958	-0.137796	0.164226	0.244917	0.0762289	0.0806989	0.0605746	0.09589	-0.0224652	0.0225431	-0.0927835	0.11621
0.255706	-0.0163404	-0.150027	0.892714	0.311085	0.137854	0.126251	0.0880768	0.240994	0.0930497	-0.00611635	0.346895	-0.12968	0.234799	0.149394	0.304562	0.236605	0.230634	0.140679	0.530156	0.0571582	-0.0588371	0.17183	0.23916	0.0308985	0.19926	0.00926174	-0.16415	0.248788	1.85251	0.144712	-0.016759	0.0770472	-0.0207311	0.122738	0.136835	0.00964946	0.176855	0.151578	0.140327	0.149496	0.129911	0.24063	0.142242	0.0795036	-0.0666713	0.312915	0.339182	0.426702	0.108743
-0.346927	-0.294782	0.252729	-0.472747	-0.106508	-0.084043	0.112472	-0.0417673	-0.0928994	-0.384928	0.112659	-0.297177	-0.0193633	0.339855	0.177115	0.078729	-0.288067	0.112894	0.0405656	-0.0289043	0.382272	0.301267	0.0726923	-0.0721906	-0.0645636	0.000593549	-0.0926607	-0.117539	-0.0235384	-0.172515	0.0885037	-0.123226	-0.000310717	-0.12647	0.215634	0.209764	-0.0739263	0.405198	-0.178691	-0.162357	0.156821	-0.177802	0.145798	0.116739	0.0925612	-0.113659	-0.0617788	-0.0764895	-0.0746276	-0.301608
0.237121	0.056912	0.216432	-0.462285	0.0878776	-0.0968119	0.00839983	-0.0598843	0.149566	0.143407	-0.125925	-0.071586	-0.297592	-0.0357008	-0.181777	-0.181013	-0.175469	-0.29231	0.223983	-0.298612	0.0327458	-0.0779419	0.0695937	-0.11204	-0.190226	-0.0408553	0.0486898	-0.0952113	-0.132176	-0.494267	-0.0739987	0.125541	-0.139214	-0.042947	-0.142439	-0.305085	-0.00232885	0.118823	-0.168184	0.17329	-0.344114	0.0756596	-0.264279	0.0732326	0.101199	0.0215623	-0.0514891	-0.0751478	-0.17889	0.0753083
0.204567	-0.0420687	-0.175071	0.0879037	0.319733	-0.313083	0.0575493	-0.108994	0.133511	-0.18182	0.117905	-0.172704	0.0602138	-0.148131	0.0624036	0.0138509	-0.28461	0.189926	-0.0134398	-0.151743	0.447917	0.213057	-0.125025	0.18206	-0.150214	0.0443287	0.113725	0.246885	-0.428336	-0.308704	0.162168	-0.206634	-0.12416	-0.115541	-0.16275	0.0319423	-0.0335655	-0.20003	-0.147688	-0.152948	-0.00390779	0.0282832	0.113608	-0.0592897	-0.0317921	-0.0555343	0.337185	-0.0755337	-0.0939275	0.127433
-0.13815	-0.194164	0.201966	-0.460411	-0.136091	-0.209992	-0.126457	-0.155614	0.122271	-0.218045	0.108083	0.217533	0.0440253	0.246283	-0.225135	0.0110063	-0.449972	-0.0405925	-0.0204902	0.156841	-0.106779	0.328992	-0.020419	-0.245754	-0.19375	-0.0325425	0.0533897	-0.147399	-0.0737316	-0.461411	-0.29754	0.303125	-0.121912	-0.0947478	-0.148894	-0.0959181	-0.0157026	0.227208	-0.126166	-0.0402774	0.111046	0.315981	-0.114617	-0.0910179	0.0518977	-0.0549817	0.118087	-0.0613307	-0.178331	0.075274
0.0650465	0.215513	-0.17833	-0.458281	0.368448	0.0512873	0.144055	0.116779	-0.282417	0.136197	0.0742281	0.241869	0.0318444	0.172775	0.21148	-0.208794	0.213999	0.194009	0.174308	0.0945288	-0.101079	-0.0735562	0.141707	-0.0116271	-0.0360686	-0.00856709	-0.152696	-0.118041	0.308158	-0.684045	-0.262246	-0.1366	-0.164063	-0.033266	-0.0234671	-0.0410953	-0.0502842	-0.00517195	0.209988	0.219108	-0.521949	0.350482	0.128013	0.107477	0.0339393	-0.120189	0.019438	-0.0773253	-0.015801	0.121272
0.180927	-0.00797469	0.140472	-0.380707	0.252433	-0.280347	0.057132	-0.100149	0.0956399	-0.00752716	0.10852	0.293072	-0.0941113	-0.0925276	-0.128492	-0.0351677	0.238773	-0.0201665	-0.302415	-0.114668	0.0601204	-0.0563727	-0.269036	-0.247713	0.2832	-0.210582	0.163274	-0.111864	-0.0959529	-0.362513	-0.0622438	-0.0729616	-0.105701	-0.117927	0.267305	-0.0568221	-0.068916	0.0190569	-0.017989	0.169805	0.158328	-0.0582658	-0.355377	-0.0475054	0.0324165	-0.0919189	-0.317871	-0.0691938	0.227513	-0.232401
-0.328924	0.0400464	-0.0659576	-0.481942	-0.00675249	-0.0765297	0.196873	-0.0370337	-0.25382	-0.194855	-0.0106215	0.0748074	0.0968481	-0.102233	-0.155231	-0.287909	0.089227	0.134968	0.14839	-0.0535897	0.0476664	0.301594	0.342069	0.0203325	-0.114706	-0.0475966	-0.117211	0.257208	0.214688	0.334922	0.13368	0.192896	-0.0674169	-0.0498072	0.168187	0.0723664	-0.00651292	-0.276544	-0.0139988	0.255986	-0.438822	-0.112184	0.0909279	-0.0734489	-0.00551782	-0.1527	-0.0111116	-0.0755836	-0.045835	0.149086
0.184496	0.0245084	0.366129	-0.518716	-0.129996	-0.113445	0.0445859	-0.0899467	-0.255986	-0.0213022	-0.232986	0.121405	0.0286363	-0.23854	0.0376016	-0.167691	-0.0202107	-0.0179001	0.287573	-0.333464	0.330356	-0.101865	-0.315931	-0.218041	0.0332807	-0.0393319	-0.102246	-0.237124	0.173871	-0.0501374	-0.271195	0.306831	-0.158486	-0.0463125	-0.116854	0.0864868	-0.0348428	-0.253704	-0.107611	-0.169216	0.13343	0.276776	0.145365	-0.0283084	0.0305583	-0.170822	-0.259189	-0.0799878	-0.103946	0.0945967
0.0802591	0.0245439	-0.0900955	-0.429685	-0.109676	-0.0746613	0.167781	0.115808	-0.246735	-0.0586217	0.0504526	-0.233454	-0.124919	0.247447	-0.213023	-0.214051	0.195084	-0.0460645	0.0688704	-0.074245	-0.0914704	-0.11912	0.123937	0.218491	-0.00596387	-0.227734	0.0465634	-0.107972	0.211484	-0.638664	-0.197602	-0.132674	0.124504	-0.13045	-0.0064121	0.128958	0.111346	0.442904	-0.191674	0.229987	0.132316	-0.156685	0.131608	0.095348	0.0525359	-0.15825	-0.379716	-0.0877717	-0.276281	-0.229313
0.196801	-0.144286	0.233215	-0.472148	0.292357	-0.0843073	-0.0949058	-0.123961	-0.0340038	0.15314	-0.207861	-0.132175	-0.276776	0.299765	-0.180691	-0.197723	0.299525	0.0807588	-0.0474393	-0.000785637	-0.109439	-0.0690784	0.403501	-0.178907	-0.00513684	-0.022786	-0.127292	-0.262561	0.349811	0.8176	-0.0925899	0.00536589	0.0742818	-0.020232	0.155815	0.0602686	-0.0460661	-0.339881	0.257176	-0.0224831	0.0768456	0.335143	0.123893	0.0591465	0.0741449	-0.166294	-0.018514	-0.0730772	-0.0545555	0.092568
0.269484	0.272891	0.132643	1.49849	0.115302	0.173127	0.0289815	0.0608144	0.235808	-0.253046	0.126869	0.274013	0.312064	0.25388	0.187687	0.377857	0.189657	0.175252	0.0912752	0.474979	-0.0148043	-0.0354393	0.31665	0.298723	0.0746649	0.0487353	0.133067	0.23453	0.191915	1.90495	0.130022	0.0990589	-0.100529	0.18664	0.0547729	0.325288	0.0798413	0.254158	-0.0912659	0.00641862	0.0846306	-0.07093	0.138241	0.091264	0.0622626	0.188198	0.306988	0.234381	0.41659	0.157471
-0.185141	-0.265927	-0.0777918	-0.343674	0.310295	0.183993	-0.0969824	0.0941462	0.171684	0.250984	0.0946374	-0.162795	0.0601096	0.271894	-0.181542	-0.00579961	0.142405	-0.47173	-0.0691974	0.325039	0.0562209	0.245234	0.303281	-0.182669	-0.0126517	-0.0304482	0.0787226	0.262613	-0.0974375	-0.307235	0.1036	-0.00203961	-0.0797623	-0.104476	-0.160315	-0.451264	-0.00988806	-0.179889	-0.15805	-0.0571646	0.114114	-0.193368	0.020317	0.115938	0.0270858	0.233908	-0.0286682	0.0609117	-0.0912251	0.0612568
-0.141766	0.0598204	0.00800051	1.69348	0.23081	0.171473	0.137521	0.107807	0.269552	0.149062	0.0932231	0.32573	0.0535349	-0.221886	0.0989848	0.274271	0.101303	0.1793	0.145033	0.563025	0.142842	0.177952	-0.0108914	0.279615	0.219744	0.0628956	-0.120575	0.323627	0.0248048	1.90239	0.138868	0.251851	0.16814	0.106892	0.0678215	0.325604	0.0819327	0.0751839	0.140223	-0.0257163	0.0836309	0.282562	0.119565	0.130089	0.0467997	0.128013	0.122656	0.259455	-0.164221	0.188999
0.249546	-0.0654978	-0.050998	-0.202226	-0.128919	-0.104762	0.20611	0.109864	0.181228	-0.0188959	0.0996123	0.046176	0.0856989	-0.113906	-0.190965	0.149779	-0.204014	-0.419082	-0.127925	0.112734	-0.153936	-0.0779726	-0.0310845	-0.13626	-0.196389	-0.0193027	0.16387	-0.23552	-0.0730487	0.292566	0.133972	-0.1656	-0.0892993	-0.137202	0.326746	-0.0852561	0.0716303	0.0339007	0.0426298	0.222442	0.0813605	-0.0739899	0.113781	0.076137	0.0452276	0.10806	0.200237	0.0656072	-0.04497	-0.158047
0.257329	-0.138888	-0.168504	-0.561832	0.0667357	0.247135	-0.0903293	0.0750585	0.116159	-0.0876664	0.121381	-0.375797	-0.257105	-0.163623	-0.169572	0.203279	0.268349	0.139324	-0.25916	0.0157486	0.0553553	-0.0579704	0.129732	0.177078	-0.104151	-0.0228967	0.0534027	-0.203816	-0.334372	-0.320618	0.113332	-0.220345	-0.133678	-0.0623042	-0.137293	0.132084	-0.0476588	-0.234741	0.310896	-0.0433192	-0.00901393	-0.181655	-0.255499	0.0790144	-0.201004	0.208075	0.244709	-0.0717282	0.334655	0.12404
0.210552	0.0390867	-0.0411533	-0.519665	-0.133018	0.113604	-0.0840126	-0.135112	-0.0663224	0.138755	-0.0438082	-0.209989	-0.140488	-0.157356	0.0166636	0.0278905	0.0595551	-0.298547	-0.250129	-0.0797959	0.0847228	-0.0947582	-0.0872965	0.100203	-0.00634019	0.302713	0.114774	0.270687	-0.0590324	-0.419439	-0.0894395	0.249545	-0.168313	0.347002	-0.113972	0.028254	-0.0601998	-0.306364	0.209371	-0.186891	-0.376459	-0.0747798	-0.198796	0.0908772	0.0413489	-0.133204	-0.297981	0.0441421	-0.225072	0.0956152
-0.346052	0.05917	-0.14309	-0.0212242	0.304794	-0.128774	0.0288146	-0.130953	-0.0895733	-0.30827	0.113785	-0.126848	0.0598857	0.315328	0.0461369	-0.166977	-0.10219	-0.351509	0.0488476	-0.163	-0.118716	-0.0946399	-0.100632	-0.212525	0.357354	-0.0409881	-0.123771	-0.139938	0.171828	-0.0322095	0.154783	-0.122862	0.0103938	-0.136482	-0.102468	-0.112002	-0.0614797	0.0424713	-0.0279639	0.25497	-0.0381161	-0.0797946	0.0212856	-0.254796	0.0996118	-0.181853	-0.380454	-0.0771973	-0.215813	0.106779
0.367014	0.134514	-0.110404	1.68919	-0.184432	-0.06063	-0.0832953	-0.0862531	0.0883832	-0.0438127	-0.131601	-0.35551	-0.0478386	0.241942	-0.170252	0.0915235	0.319614	0.123578	-0.158343	0.351419	-0.123455	-0.0686398	0.0821881	0.302888	-0.0147523	-0.0157536	-0.134225	-0.231905	-0.32258	0.98166	0.027098	-0.194174	0.108794	-0.06165	0.0821372	-0.348025	0.0823694	0.0422791	-0.0822988	-0.0467257	0.107476	-0.0767889	0.025219	-0.0800497	0.0307117	-0.139496	0.185849	0.29487	-0.140938	0.102531
0.0785611	0.00994448	0.173477	-0.510878	-0.0671747	-0.0887647	0.139664	-0.0988127	-0.0901291	0.12553	-0.118423	0.228813	0.313197	-0.190888	0.231737	0.0181104	0.251454	-0.0422542	0.242682	-0.28733	0.0200405	0.281465	-0.349282	-0.19262	-0.0132482	-0.0580882	-0.148418	-0.245033	-0.0902338	-0.54642	0.0153939	0.231795	-0.168177	0.229444	-0.0215862	0.0597078	0.00344924	-0.0292592	0.15852	0.219996	0.120204	0.264075	0.407945	-0.384506	0.0423484	-0.138566	-0.265737	-0.082821	0.181336	-0.219143
-0.181883	-0.143791	0.0987299	1.57543	0.302276	0.258051	-0.0379921	0.0733166	0.210498	0.170795	0.115839	0.230038	0.264551	0.267149	-0.0350109	0.340617	0.174975	0.158154	-0.410742	0.26457	-0.0981608	-0.0696388	0.106194	0.209588	0.235171	0.17171	0.0997175	0.232905	0.281743	1.93413	0.118188	0.230691	-0.0819228	0.253434	0.212329	0.325266	0.102348	0.042585	-0.108684	-0.130248	0.0851495	-0.186657	-0.310358	0.109755	-0.100905	0.220366	-0.00139902	0.222442	-0.0100862	0.163742
0.232752	0.212681	-0.217323	-0.250773	-0.0966525	-0.069524	0.12842	0.118663	0.0694828	0.128402	0.0931328	-0.00433052	0.0128419	0.238912	-0.179982	0.286256	0.184101	-0.0883571	-0.229557	0.553545	-0.104752	-0.0630408	0.290562	0.0229757	-0.045937	-0.0341717	0.102436	0.257464	-0.0552006	0.308471	0.104474	-0.13722	0.167112	0.286661	-0.126943	-0.419321	-0.0653371	-0.275218	0.220526	-0.0649036	-0.432877	-0.0814685	-0.103294	0.0390366	0.107706	0.198419	0.213077	0.233287	-0.124192	-0.285538
0.27657	0.262922	-0.039265	-0.302101	-0.162511	-0.144442	0.0122216	-0.129031	-0.236143	0.167417	-0.0192942	-0.120757	-0.169649	-0.205006	0.0825299	-0.208588	-0.267943	0.0980767	-0.0448078	-0.0149951	-0.121602	-0.115852	-0.210438	0.0674649	-0.0258233	0.189478	0.10987	-0.140806	0.237932	-0.490143	0.139562	0.0425946	-0.101137	-0.133972	-0.181218	0.10881	0.0944929	0.238774	0.000274119	0.225225	0.0907176	0.0666769	0.0647711	-0.124323	0.0556824	-0.138995	-0.00123528	-0.0673653	-0.284745	0.0524238
-0.240904	-0.301527	-0.0697754	0.232003	-0.10825	-0.118466	0.0562755	0.104981	-0.242259	0.195083	0.0674874	-0.113079	-0.0198024	-0.108616	-0.200432	-0.265392	-0.244534	0.0401878	-0.0841458	0.682472	-0.0789922	0.34466	0.0929798	0.205163	-0.141248	-0.0505417	0.113671	0.178208	-0.297988	-0.352992	0.0158784	-0.219763	0.0286706	-0.126187	-0.162675	0.17501	0.0903348	-0.0309263	0.268593	-0.0629752	0.101509	-0.147419	-0.25738	0.0967312	0.0313535	0.189205	-0.401537	0.269674	-0.0419192	-0.224786
0.210644	-0.059409	-0.0872878	-0.353361	0.0893855	-0.170364	-0.0849916	0.12466	-0.306235	0.119573	-0.11887	-0.273413	-0.302771	-0.171529	-0.170207	-0.125762	0.213681	-0.0355179	0.113541	-0.313667	0.193087	-0.0886012	-0.343842	0.167332	-0.154314	-0.220061	0.1261	-0.156701	0.169559	-0.161591	-0.0813094	0.112708	0.0905576	0.335541	-0.0720763	0.0991705	-0.0483088	-0.310282	0.225667	-0.0557324	-0.376566	-0.106086	0.0642049	-0.243523	0.00073279	0.0329138	-0.347226	-0.0747563	0.150322	0.0827227
-0.240005	0.0803365	-0.0647587	-0.135172	-0.106419	-0.13229	-0.00716501	0.15136	0.187398	-0.146588	0.0098708	-0.283749	0.0084978	0.206535	0.0659043	-0.163661	-0.200157	-0.498001	0.059786	-0.0764618	-0.0823757	-0.0869232	-0.317545	-0.227847	0.0194229	-0.0767557	0.0428047	0.236452	0.233048	-0.656886	0.109856	0.223516	0.0609872	0.417162	0.164311	0.207033	-0.094346	-0.111562	0.169562	0.153088	-0.330681	-0.312271	-0.14525	0.171029	0.0252698	-0.106079	-0.164739	-0.0777241	-0.016412	0.116347
0.183623	0.0425492	-0.158087	-0.525906	0.00315965	-0.0664011	-0.133922	-0.0801505	-0.219892	0.14644	-0.125592	0.270014	-0.014186	-0.243666	0.0358161	-0.180045	0.299855	0.137316	0.0707089	-0.424626	0.0345479	-0.0911942	-0.329898	-8.58001e-05	-0.0889393	-0.231571	-0.116535	-0.28908	0.197451	-0.360565	-0.357274	0.123496	-0.144693	0.184366	-0.172627	0.050326	-0.0415183	0.08084	-0.00799685	-0.0846701	0.1513	0.12149	0.0335306	0.0763508	0.0134067	0.04096	-0.0137016	-0.0716748	-0.226389	0.103055
-0.5388	0.0720206	-0.135512	1.68936	0.0668635	-0.0264272	-0.0425005	0.0824899	0.249081	-0.282694	0.0935607	0.338473	0.322183	0.239041	0.210014	0.309655	-0.258353	0.116862	0.153394	0.53904	-0.0220735	-0.0557733	0.125465	0.154771	0.320333	0.180865	0.132777	0.24637	0.0610442	2.00319	0.134824	-0.130637	0.145924	0.0419612	0.0733106	0.179661	0.0844184	0.324238	-0.00723904	0.184121	0.0395892	-0.0657684	0.290429	0.124305	0.0363009	0.159249	0.174715	0.260855	0.369295	0.128813
-0.0482706	-0.388935	-0.0217985	-0.334181	-0.0942205	-0.0514747	-0.124638	0.0142715	-0.301337	0.0496666	0.015141	0.232518	0.0154641	0.233935	0.0604023	0.0634233	-0.256787	0.00399866	0.134646	0.162348	0.0234652	0.30191	0.212489	0.195746	0.20617	-0.0530863	0.0543095	0.220306	-0.246457	0.237241	0.0847522	-0.00971615	0.195371	-0.112262	0.126862	-0.0883196	0.0849729	0.0762516	-0.168448	-0.0720977	0.0821147	-0.111399	0.224308	-0.127916	-0.0530318	0.0232566	0.347906	-0.0887305	-0.0280445	-0.171832
0.155781	-0.153641	-0.0703727	-0.56316	0.0223491	0.105689	0.00916021	0.119001	-0.156733	0.13063	0.137485	-0.0873674	-0.344663	0.226145	0.122236	-0.182445	0.252602	0.0397643	0.0396201	0.0822749	0.0234155	0.271028	0.0462267	-0.206816	0.234405	-0.0187733	-0.149001	-0.0951313	-0.164273	-0.578925	-0.348297	0.0287407	-0.13371	-0.109134	0.0245769	0.16655	-0.00429001	-0.276267	-0.156264	0.166294	0.092112	0.302302	-0.0980766	0.0558625	0.06009	0.107493	-0.00372422	-0.0894887	-0.0145667	0.118893
0.155121	-0.152924	-0.0495792	-0.490442	-0.128677	-0.268933	-0.0832609	-0.108775	-0.206912	0.0257313	-0.0498963	-0.101086	0.0744423	0.171909	-0.174192	-0.15802	0.304892	-0.113864	-0.0855593	-0.329997	0.0539896	0.307055	-0.221833	0.247948	-0.143231	-0.0838925	0.0385711	-0.122894	0.190661	-0.562362	-0.0706414	0.0985139	0.161814	-0.139787	-0.09305	-0.191663	-0.0433455	-0.233638	0.0178081	0.22582	0.145923	-0.0917647	0.0897178	0.093738	0.0579053	0.00887539	-0.333636	-0.0832644	0.161266	0.0629901
-0.071675	-0.2029	0.00932733	-0.373828	0.00183533	-0.10952	-0.0707618	0.0856139	0.20932	-0.00686437	0.0853359	0.207	0.262178	0.175081	-0.18906	-0.0605467	-0.198709	-0.0356069	0.14843	0.0102081	0.0278707	-0.0679453	0.0816258	-0.0862594	0.0361282	-0.087039	-0.0473841	-0.122971	-0.326132	-0.033885	0.128637	0.140025	0.133078	-0.186008	0.261803	-0.404035	0.0940692	0.212145	-0.158231	-0.0649426	0.0955836	0.299299	-0.0103691	0.0791139	-0.292692	0.0976918	0.175003	-0.0713416	-0.137193	-0.310449
-0.14878	-0.151328	-0.101025	-0.460537	0.279863	-0.0863608	-0.0758251	0.0818318	-0.264303	0.147307	0.0510691	-0.0582668	-0.0610768	-0.267698	0.0307824	0.0346207	0.169854	0.0460144	0.243404	-0.391082	-0.0543353	-0.0975283	0.12663	-0.0260014	-0.1165	-0.0406289	-0.0762313	-0.13708	0.358674	-0.633811	-0.024218	-0.162536	-0.135517	-0.130311	-0.120204	0.067223	-0.0803546	-0.296427	0.251442	-0.181387	0.149053	0.365421	0.0815965	0.100407	0.141033	0.0725347	-0.257072	-0.0781647	-0.195849	-0.211167
0.184344	0.0934587	-0.220829	-0.193844	-0.0130582	-0.148446	-0.0902131	0.119264	0.120905	0.131241	-0.0842583	-0.156745	-0.210387	-0.109334	0.140821	-0.143052	-0.212722	0.170522	-0.172663	-0.353227	-0.154609	0.00643927	-0.304405	0.249154	0.0177004	0.0912822	0.125589	-0.136371	-0.367435	-0.223263	-0.0917689	-0.217097	-0.0558273	-0.076339	-0.171171	0.0777032	-0.0530066	-0.225605	0.144218	-0.188119	0.0645381	0.0201963	0.10237	-0.179806	0.0143361	-0.0840086	-0.127453	-0.0826212	-0.259221	-0.172168
-0.354416	-0.188354	-0.0802621	-0.489608	0.293732	-0.135943	-0.153465	-0.0394401	-0.0377614	0.156203	0.11282	0.225348	-0.0727999	-0.289543	0.0479888	-0.171292	-0.180337	-0.450035	0.0129112	-0.104066	-0.0453325	-0.0745371	-0.281012	-0.188521	0.0155839	0.320552	0.148856	-0.0764897	0.0253263	-0.644537	-0.0746965	-0.210793	0.0154629	-0.116581	-0.123329	0.154142	-0.0725235	-0.0490689	0.000657429	0.297418	0.0665878	-0.100206	0.0798956	0.131984	0.0532219	0.0825	-0.0304407	-0.0719439	-0.089459	0.0625202
-0.44609	-0.28929	-0.0658515	-0.486325	0.0282993	-0.32326	-0.135054	-0.0939039	0.158361	0.180133	0.110821	-0.118901	0.0672202	-0.156034	-0.20183	-0.0486331	0.235651	0.0768653	-0.0569059	-0.232628	-0.137521	-0.0910406	-0.138144	-0.192562	-0.124639	-0.0296211	0.129843	-0.17387	-0.0554403	-0.323971	-0.0264088	-0.21047	0.00150253	-0.142166	0.311377	0.177669	0.0872065	-0.00893318	-0.131346	-0.0595409	0.115961	-0.167038	0.092559	0.087567	-0.241237	-0.114791	0.187493	-0.0797899	0.23215	0.0704987
0.22402	-0.0711449	-0.140382	-0.4965	-0.0269041	-0.112793	-0.0923632	-0.0753419	-0.0611164	-0.146718	-0.116748	0.0922651	-0.293824	-0.216347	-0.115445	-0.143695	-0.327472	0.109983	-0.00451168	-0.343935	0.381818	-0.0816141	-0.315665	-0.264166	-0.0675324	-0.0229447	-0.0288399	-0.0648242	0.39327	-0.635754	0.021459	0.0682843	0.0598043	0.167087	-0.0877055	0.0374097	-0.0826771	-0.228459	0.220258	0.208374	0.134181	-0.0736003	-0.156147	-0.105757	0.0774473	-0.0188877	0.151805	0.0519278	-0.222359	0.0684344
0.197797	0.29768	-0.0220945	1.59832	-0.174284	0.262956	0.15199	0.138218	0.23106	-0.140331	0.121435	0.324354	-0.111002	0.25065	0.285843	0.304733	0.0542646	0.080312	0.210872	0.328029	-0.0771421	-0.0625098	0.12559	0.101143	0.0677777	0.247599	0.0922665	0.267658	-0.316088	1.99327	0.0974474	-0.151072	0.0140365	-0.142547	-0.165618	-0.00856525	0.0203369	-0.00148689	-0.115765	-0.0177858	0.08608	0.126138	0.264174	0.0935921	0.0490748	0.156921	-0.012277	0.250056	-0.258901	0.128738
-0.430885	-0.136425	-0.188142	0.272548	0.128178	-0.0984328	-0.133683	0.11501	0.142825	-0.123093	0.0885106	0.234216	0.308908	-0.191433	0.0605158	-0.174904	-0.170296	-0.0478013	0.0184869	0.533397	0.261427	0.0404306	-0.0369076	-0.310269	0.281892	0.0745488	0.061002	-0.0840231	-0.0312868	-0.344542	-0.299367	0.0364456	-0.0961439	0.106111	0.169774	0.233534	-0.0926418	0.0227651	-0.070364	-0.212585	0.0560599	0.0810596	-0.274916	0.130187	0.0550246	-0.134074	-0.0686007	-0.0783274	0.213581	-0.343046
0.196149	0.0555456	-0.0658551	-0.498362	-0.135916	-0.0871606	0.163775	0.0960744	0.150642	0.133719	-0.117745	0.309296	0.351765	-0.226229	-0.138888	-0.184562	0.0774559	0.081437	0.256834	-0.364144	-0.0592729	-0.0852884	-0.172739	-0.0243712	-0.138855	-0.263317	0.12316	-0.182197	-0.0692573	-0.658549	0.152952	0.253822	0.0634277	-0.0760875	-0.0838624	-0.0641378	-0.0597467	0.0364727	0.228015	0.268778	0.086784	-0.0813713	0.127476	0.107339	-0.253132	0.0753763	-0.0656514	0.0541703	-0.180025	0.121783
0.228756	0.239115	-0.0123832	1.55732	0.329985	0.245891	0.115667	-0.013208	0.183906	-0.276167	-0.0588189	-0.37369	0.0221189	0.228371	0.228384	0.28655	-0.2507	0.174665	-0.192192	0.432264	-0.0731703	-0.0518016	0.342937	0.220067	0.296206	-0.224542	-0.172525	0.26303	-0.0540839	2.09993	0.108852	-0.146461	0.15838	-0.0446887	0.0675228	0.115429	0.0969673	0.355833	-0.0343693	-0.0729556	0.0596183	-0.147889	0.120378	-0.158592	0.0414249	0.0446036	0.0372493	0.290166	-0.0901486	0.113185
0.319827	0.172098	0.287179	-0.54098	-0.159863	0.104662	-0.116356	0.127906	-0.00476603	0.144497	-0.00521971	-0.0285726	-0.0303779	-0.24069	0.0494488	-0.189608	0.265237	0.174665	0.0258928	-0.364651	0.0487069	-0.0917724	-0.320453	0.00808726	-0.0192146	-0.0255998	-0.0639996	-0.301943	-0.0652652	-0.386989	-0.278741	-0.120465	-0.181104	-0.0666188	-0.182046	0.0689812	-0.0234001	0.0110715	0.0841939	-0.0810776	0.100169	0.352013	0.0868143	-0.135835	0.0680997	0.071614	-0.163316	-0.0824822	-0.129127	-0.179378
0.256957	0.0439802	0.231115	0.820298	-0.17212	0.316204	0.0104109	0.118482	-0.0354985	-0.145691	0.143077	0.284407	0.149018	0.201711	0.1778	-0.193714	0.146884	0.153263	0.179335	0.051028	-0.0728013	-0.064001	0.11849	0.271547	0.0764362	-0.0358252	0.100186	0.22736	-0.0858963	1.80428	0.153789	0.224365	0.0629287	0.222058	0.16299	0.173538	0.0761372	0.125544	-0.135164	0.17687	0.109288	0.29745	0.263834	0.0899229	0.046608	0.206562	0.124191	0.0582491	-0.140082	0.153906
-0.165439	0.117249	-0.19682	-0.425986	-0.0576905	0.390863	0.103208	0.103886	0.206061	0.191729	0.130167	-0.19847	0.340032	0.300708	0.127087	-0.215443	0.163543	0.148156	0.240534	0.621641	-0.105276	-0.00256554	-0.146481	-0.015799	-0.0942909	-0.0365124	-0.0853653	0.256919	0.151975	-0.617004	-0.263074	-0.0330235	0.0292743	-0.0583433	-0.113628	-0.0856256	-0.0125792	0.0315584	-0.110739	0.191719	0.133714	-0.0922261	0.120757	-0.100728	0.0724908	0.0942403	-0.106356	-0.0617009	-0.19261	0.169111
-0.429736	-0.00994929	0.280752	-0.361755	-0.14105	-0.141265	0.146762	-0.0355177	-0.120993	-0.0373729	0.128313	-0.279273	0.326313	0.197416	-0.210862	-0.261262	0.136458	-0.396269	-0.12155	0.0997197	-0.0393694	0.0487157	-0.0392193	0.200025	-0.131053	0.0147126	-0.102229	0.277495	-0.330627	-0.0933743	-0.0315611	-0.200188	-0.00145637	-0.141937	-0.0245456	0.224223	-0.039573	-0.0995685	-0.210378	-0.0460699	0.119821	-0.191923	0.156332	0.120498	0.0699417	0.191314	0.205742	0.0627104	-0.0881834	0.141156
-0.328371	0.258591	-0.0321972	1.54915	0.0524875	0.180945	-0.095338	0.121911	-0.111281	-0.124191	0.125449	-0.150385	0.0838183	0.306237	0.135646	0.254518	0.186	0.126295	-0.0760111	0.570458	-0.0936156	-0.0493377	0.184353	0.00313155	0.267459	0.0858309	0.168078	-0.336836	0.218223	1.16217	0.143965	-0.105315	0.0436427	0.29298	-0.0486006	-0.0573848	0.0480153	-0.00621185	0.223928	-0.0552992	0.118169	-0.10189	0.0763447	0.0762192	0.0746866	0.223174	0.152811	0.277981	0.0526914	0.118169
-0.0970867	0.0744379	0.145894	1.64973	0.296612	0.235865	0.144515	0.169542	0.255362	-0.0874202	-0.156342	0.321614	0.358484	-0.106102	0.187611	0.115427	0.175741	0.176917	0.225768	0.29126	-0.0894054	-0.0625235	-0.324882	-0.00308154	0.296205	0.215418	0.163841	0.277992	0.0151086	1.43821	0.093164	0.0937178	0.21025	-0.0949005	0.024723	0.314735	0.093058	0.109182	0.00730159	0.166384	-0.326209	0.0933854	0.170166	-0.0603352	0.0647623	-0.0643078	0.150504	0.367274	0.272422	0.140315
0.269684	0.14017	0.142825	0.621123	0.309924	0.311193	0.116176	0.0760464	0.220913	0.130411	0.116667	0.251714	-0.0399482	0.230958	0.206716	0.361868	0.239176	0.193714	-0.0905573	0.386255	-0.0500223	0.00554095	0.203044	0.231186	0.0499466	0.056174	0.111682	-0.206842	0.237861	1.85131	0.107181	0.17849	0.0619981	-0.0439811	-0.00193516	0.3101	0.0860034	0.294051	0.17025	0.154848	0.0945213	-0.0490414	0.276033	-0.394315	0.11515	0.177505	-0.0391798	0.0317542	-0.0580401	0.169164
0.206657	0.240895	0.0219363	1.49747	0.208399	0.266259	0.127336	-0.0415577	0.263139	0.14645	0.143921	0.322395	0.0193627	0.206013	-0.0419164	0.330313	-0.10238	-0.0955278	0.093625	0.255618	0.163063	-0.039124	0.339958	0.221758	0.0727363	-0.0158156	-0.116674	0.319617	0.1699	1.96178	0.123752	0.0267724	0.17742	0.275652	0.114792	0.319189	0.0942678	-0.0310918	0.169115	0.1901	-0.425398	0.231641	0.191829	-0.199696	0.00866441	0.181439	0.177281	0.236972	-0.0725006	0.167036
0.32614	-0.0440313	-0.0725185	-0.488537	-0.148981	-0.0961521	-0.00487315	-0.133768	-0.240506	0.111912	-0.189793	0.195145	-0.146198	-0.214327	0.277979	-0.297694	0.257337	0.00888262	0.0364505	-0.293898	0.0917341	-0.0900894	0.0649374	-0.0443619	0.0299125	-0.0410726	0.0370622	0.266713	-0.302245	-0.631773	-0.0896989	0.0725481	0.0556858	-0.120814	0.0501889	-0.0245898	0.0123602	0.275406	-0.220062	-0.173061	0.0956842	-0.11681	-0.0803208	0.0968985	0.0567833	-0.159213	0.36608	-0.0808563	0.366036	0.0950267
-0.49401	-0.356019	-0.21329	-0.352606	0.24356	-0.319687	-0.0955304	0.0619724	0.212702	-0.141496	0.0847371	-0.0947871	0.0998241	0.158985	-0.166974	0.0916472	-0.141939	-0.438128	-0.395109	0.436375	-0.0553914	-0.0551709	-0.257389	-0.0206432	0.048728	0.041871	0.127423	0.186706	0.0561305	-0.622856	0.121953	-0.181804	-0.119575	-0.144508	0.201649	0.111546	-0.121667	-0.224515	-0.0994885	0.189409	0.0699492	-0.088613	-0.376205	0.056077	-0.271682	0.227776	-0.167877	-0.0665602	0.430746	-0.245351
0.23563	0.335249	-0.187178	-0.402573	-0.111172	-0.0666575	-0.0706986	0.0564237	-0.127675	0.0614109	-0.0645366	0.230664	-0.237808	0.334458	0.0248377	0.362133	0.211245	-0.438665	-0.244734	0.0163226	0.0479846	-0.0628516	0.0801456	-0.00576086	0.00956536	0.00127469	-0.109309	0.253543	-0.364523	-0.64274	0.112859	-0.238146	0.0981948	-0.12152	0.212612	-0.0233994	0.00399633	0.0882886	-0.145971	-0.0557107	0.111295	0.112269	-0.14546	-0.0555589	-0.239995	0.0142743	0.201282	-0.0793024	0.273225	0.090717
0.236407	0.0975367	-0.175268	0.99257	-0.12755	-0.110536	-0.0728215	-0.00521221	-0.24761	-0.09316	0.124998	-0.323483	-0.297869	0.2779	0.100768	-0.150566	-0.273187	0.111778	0.0519422	0.316065	0.00367059	-0.0813289	-0.0467406	-0.193745	-0.0286085	-0.230259	0.114914	-0.0644348	0.0415824	-0.624411	0.158447	1.82787e-05	0.0249657	0.219938	-0.0496145	0.098483	-0.0606787	-0.266197	-0.153446	0.186831	0.138749	-0.253585	-0.187676	0.0775477	0.0163615	0.120903	-0.0236056	0.0484689	0.132699	0.07436
0.31117	0.189059	-0.0683931	-0.518616	-0.136491	0.0922682	-0.10401	0.0625672	-0.30634	0.13375	-0.0816594	-0.282991	-0.081787	-0.220243	0.176269	-0.148723	0.183621	0.12318	-0.192472	-0.030158	0.26716	-0.111875	-0.207044	-0.29622	0.115917	-0.0439749	-0.145373	-0.126932	0.231245	-0.285867	-0.0851351	0.29641	0.0261213	0.327358	0.193537	0.100369	-0.0839656	-0.368741	0.164876	-0.0566712	0.093547	-0.123941	0.0856472	-0.128264	0.0394301	0.0374945	-0.306123	-0.0713585	-0.0623474	0.0902829
0.191976	0.0234413	-0.0706878	-0.425867	-0.130279	-0.0944395	-0.0641863	-0.135038	0.251165	0.0879675	-0.12925	-0.167354	0.0462357	-0.0443334	0.307819	0.226559	0.103881	-0.373354	0.091957	0.141093	-0.080591	-0.0570738	-0.058744	0.279945	0.0723704	-0.0365259	-0.199678	-0.260169	0.232043	-0.47609	-0.281171	0.151653	-0.126194	-0.102888	-0.147313	0.0725561	0.0934253	-0.29978	-0.13636	0.179169	0.0785062	0.0486151	-0.137973	-0.122423	0.0350625	-0.168087	-0.341835	-0.0580845	0.29846	0.109283
-0.293202	0.00765386	-0.0806326	-0.437294	-0.122373	0.410413	0.194722	0.0818032	-0.264463	-0.332655	0.013311	0.151704	-0.0636029	0.362132	0.0443519	-0.186342	0.122575	0.127516	0.17733	-0.295981	0.178057	-0.103072	-0.261207	0.0394521	0.0225042	-0.0406732	-0.144736	0.219065	0.265511	-0.0396799	0.113038	-0.146386	0.143953	0.354127	-0.150209	0.0956852	0.0635329	0.117224	-0.0121951	-0.0639499	0.113095	-0.117944	0.100998	-0.139547	0.0344269	-0.156491	-0.00318113	0.0367442	-0.108663	0.0805108
-0.0324683	-0.268255	-0.153981	-0.46192	-0.159062	0.0771076	-0.0906502	0.0292142	0.179334	-0.213953	0.110064	0.403691	0.0652071	0.184946	-0.21618	-0.200178	0.277906	0.167715	-0.0333294	0.383782	-0.0669477	0.242363	-0.033801	0.252217	-0.117105	-0.0304131	0.0754042	-0.267476	0.328519	0.376372	0.09724	0.0910732	-0.167154	-0.132626	0.0523326	0.208476	0.100581	0.262185	0.245614	0.262243	0.0396004	0.312014	0.18616	0.0958795	0.0479729	0.0339924	-0.291509	0.0481761	-0.204755	0.134545
0.354046	0.0148427	0.33585	-0.506194	-0.0236062	-0.0605604	0.16421	-0.0695531	0.214055	-0.22911	-0.160597	0.169407	-0.248539	-0.20816	-0.209221	0.314285	0.220973	-0.362477	0.0291199	-0.0989944	0.349296	-0.0638984	0.144109	0.194563	-0.11962	0.0389732	-0.104937	-0.135959	-0.122867	-0.609285	0.128862	-0.193237	0.0219664	-0.040223	-0.0948002	0.171649	0.0895434	-0.28641	-0.0900034	-0.048806	0.10794	-0.120893	-0.30942	0.0626907	-0.179679	0.108151	-0.0309057	-0.0825887	0.323524	-0.188873
0.360748	0.126343	-0.038931	-0.295536	-0.122194	0.0425012	0.178599	-0.119521	-0.209499	0.145634	-0.114261	0.375967	-0.14664	0.229411	-0.00810678	-0.204958	0.165213	-0.111045	-0.0259204	-0.347731	-0.0949039	-0.107537	-0.173036	0.253656	-0.118041	-0.0873878	0.00671384	0.252919	0.320249	0.345785	-0.0853889	0.0736944	0.0748504	0.335642	-0.158726	0.029129	-0.0233379	-0.0769573	0.0797501	0.223158	-0.541806	0.206701	0.121862	-0.0949693	0.0198068	-0.151668	-0.272076	0.0408419	-0.201267	0.104689
0.195799	0.263089	-0.166917	-0.46249	-0.100066	0.364508	0.0292489	-0.101433	0.170379	0.142485	-0.15205	-0.0708243	-0.00885556	-0.160121	0.231667	0.323826	0.175863	-0.414296	0.0593156	-0.0620448	-0.0851645	-0.0916298	0.232317	-0.301592	-0.171153	-0.0351489	-0.0615033	0.175923	0.17951	-0.610743	-0.105082	0.171559	-0.0998055	0.306673	-0.083176	-0.0315265	0.0388203	-0.299169	-0.165059	0.0986202	0.0264327	0.334218	-0.125203	-0.0839136	0.0438632	0.104146	0.0588869	-0.0707985	-0.226312	-0.188788
-0.563971	0.0160567	0.00229111	0.00878911	-0.0110327	-0.368391	-0.0518701	0.114044	0.220568	-0.191475	0.103121	0.0771177	0.0763116	0.133394	-0.246046	0.00557733	0.202841	-0.411963	-0.184284	0.564917	-0.0282085	-0.0771473	0.242658	-0.208988	0.222421	-0.0346218	0.0977928	-0.146242	0.0626033	-0.501873	0.134016	0.147692	-0.132285	-0.0919868	0.214753	-0.115459	0.100908	0.252817	-0.112446	-0.0619461	-0.420387	-0.124092	-0.0516741	0.10426	0.0432344	0.0559274	-0.102901	-0.0782017	-0.102643	0.121147
0.0590256	-0.246498	-0.0963174	-0.379743	0.0229282	-0.31736	0.216861	-0.126229	0.193362	0.12599	-0.0975756	0.260287	-0.0489173	0.0873213	0.0901193	-0.0620017	-0.214267	-0.291623	-0.140078	0.166579	-0.0826952	-0.0927832	-0.204389	0.22391	0.288605	0.0210915	-0.0315972	-0.298697	-0.26254	-0.54179	0.111181	-0.0294487	-0.125434	-0.151568	-0.14696	-0.317545	0.0639344	-0.200164	-0.0820504	-0.0656889	-0.0250195	-0.0931712	-0.324309	0.0601368	-0.266474	-0.153091	-0.269585	-0.0720831	0.26563	0.0325721
0.269315	0.0338403	0.290454	0.537612	-0.11955	-0.0920672	-0.0595863	0.15062	-0.0699461	-0.297601	0.0956014	-0.201744	0.066109	0.279314	0.0902715	-0.164822	0.128361	-0.332404	-0.335381	0.0665185	-0.0895891	-0.0102217	0.133371	-0.00191216	-0.14492	0.0635267	-0.0741117	-0.126862	-0.283858	-0.32226	0.125635	0.110385	-0.113482	-0.0812272	0.170191	0.0879708	-0.0829823	-0.204956	0.243025	0.145972	-0.403511	-0.0970746	-0.178386	-0.103875	-0.000338724	0.069468	0.204558	0.0447472	0.233717	-0.24823
-0.413759	0.250223	0.126707	1.58617	0.313951	-0.0301731	-0.00198703	-0.015706	-0.189203	0.159737	0.12445	-0.243498	0.351019	0.258966	-0.220731	0.292904	-0.256831	0.212132	-0.152409	0.46231	0.060945	-0.0304602	0.313902	0.0956763	-0.142154	0.20666	0.0460857	0.304252	0.185001	1.98629	0.113616	0.127387	0.0668134	-0.0121111	0.216892	-0.0954193	0.0686863	0.142412	-0.145837	0.0982745	0.0284841	-0.282927	-0.314096	0.0636646	0.0313701	0.20775	0.213338	0.244915	0.342016	0.104091
0.126908	0.215282	-0.0429301	-0.223703	0.0579717	0.489545	0.0349839	-0.101245	-0.0896283	-0.139059	-0.0991784	0.386647	-0.342644	-0.202097	0.162692	-0.223591	0.203497	0.197626	0.260928	-0.375215	-0.0788852	0.225535	-0.340315	-0.270194	0.0673433	-0.0186524	-0.139362	-0.103629	0.243478	0.00851077	-0.110143	0.0148626	-0.155695	-0.0927441	-0.0983656	0.0114295	-0.0594278	-0.0598715	0.194862	0.169261	0.126206	0.281491	0.423358	-0.0942702	0.0410671	0.0647863	0.345388	-0.0862978	0.109909	0.074179
0.173492	0.135656	0.227004	-0.56305	-0.093518	0.144986	0.144853	0.116223	-0.118185	0.125309	-0.0361218	0.274535	-0.239411	-0.233851	-0.167272	-0.213116	0.159023	0.0536791	0.0974701	-0.34008	0.0152127	0.220847	6.23793e-05	0.187874	-0.130239	-0.0287801	0.0931009	-0.326707	-0.0225312	-0.624576	-0.0913929	0.0698411	0.0492198	-0.096853	-0.0170327	0.128805	-0.0592198	0.271817	0.028426	0.175056	0.10483	-0.0790083	0.110236	-0.0708664	-0.241116	0.0384348	0.180552	-0.0960126	0.228048	0.0746641
0.293212	-0.10474	-0.0623585	-0.532376	0.0814679	-0.28437	0.0438956	0.102539	-0.196608	0.129286	0.148627	0.116752	-0.176403	-0.206503	0.228604	-0.233903	-0.196052	0.179555	-0.0572943	-0.37765	-0.0717005	-0.102866	-0.26424	0.283422	-0.148663	-0.0447582	0.00492733	-0.297802	0.274115	-0.639899	-0.0544063	0.312063	-0.0936967	-0.0926864	0.196726	0.165236	-0.082336	-0.318678	0.0028643	-0.136761	0.139736	0.102747	-0.0670738	0.107176	0.00814293	0.000446874	-0.0505953	-0.0727087	0.0931767	0.100537
0.218236	-0.282416	-0.165125	0.268489	0.0838818	-0.349972	-0.0796192	0.0964485	0.151529	-0.116131	0.0777752	-0.130522	-0.00829849	-0.198215	-0.0217025	-0.0251063	0.295388	0.120527	-0.422125	0.505818	-0.112764	-0.0478062	-0.270888	0.317195	-0.150889	-0.00180595	-0.106814	-0.0882309	-0.262133	-0.382921	0.088572	0.150129	0.0231232	-0.165741	-0.166106	-0.328288	0.00656579	-0.043525	-0.161524	0.150721	0.0761027	-0.158592	-0.364339	0.0983323	0.0312549	0.0582961	0.178104	0.2908	-0.281942	-0.233959
-0.236086	0.187917	-0.0666595	-0.331532	0.0149813	-0.125865	0.167312	-0.11538	0.201423	0.154712	-0.0320832	0.141982	-0.130826	-0.0869146	-0.180024	-0.299458	0.141126	0.084725	0.0312707	0.304281	-0.135613	-0.0668474	-0.284471	0.0381242	-0.042636	-0.170622	0.0349229	0.289573	0.276566	-0.600879	-0.0324096	0.331946	0.0627447	-0.0597149	0.0462377	0.140473	-0.0891306	-0.302047	0.0051679	0.199063	-0.409659	-0.189626	-0.168977	-0.0894893	0.0530534	-0.142603	-0.0732895	0.0414578	0.310498	0.12278
0.0911024	0.056423	-0.194558	-0.469146	-0.000215751	-0.0728448	0.16134	0.110226	0.155464	-0.011342	0.115629	0.169498	-0.345671	0.271653	-0.234736	0.235728	-0.0885104	0.16706	-0.0292473	0.0632812	-0.102409	-0.0773189	-0.235746	0.0570976	0.313137	-0.0484282	-0.0848667	0.236939	-0.102395	-0.369025	-0.0764075	0.0629554	0.0164029	0.254423	-0.0916345	0.0522548	-0.0424534	-0.34474	-0.0400778	-0.187372	0.052715	-0.255925	0.0790164	0.118114	0.0877488	-0.0142401	-0.195784	-0.0749002	0.43797	0.114436
0.272559	0.188998	-0.0732041	-0.525096	-0.121983	0.434658	0.0205605	-0.0916919	0.147638	0.173634	-0.163009	0.239757	0.0122792	-0.205103	-0.0540789	-0.250981	0.0738542	0.131291	0.206052	-0.357698	-0.101412	-0.074545	-0.306195	0.00030547	-0.114318	-0.0497829	-0.0846592	-0.334828	0.249916	-0.549462	0.0017145	0.2545	-0.210283	0.501955	0.0644996	0.0575696	-0.0930466	-0.0367852	0.185067	-0.0554054	-0.188086	0.277731	0.0948061	0.0903747	0.0634804	0.0789416	-0.0451683	-0.0629118	-0.206049	0.113658
-0.161402	-0.131283	-0.0646578	-0.560564	-0.12301	0.114758	-0.0946994	-0.12499	0.164742	-0.161028	-0.206418	-0.290485	-0.0152493	-0.189021	-0.02443	-0.174766	0.166788	0.0915161	0.27114	-0.173231	-0.0945442	-0.0771368	0.425761	-0.266131	-0.146386	-0.160733	0.0416774	-0.291569	-0.238893	-0.475418	-0.0831454	0.144005	-0.172006	-0.0798611	0.00877223	0.116894	-0.123503	-0.0547728	-0.0522048	0.131517	0.118329	0.233698	0.129505	-0.117152	0.0151669	0.0605331	-0.082782	-0.0721369	-0.111586	0.0915108
0.0809545	0.0980733	-0.0358918	0.136316	0.0932929	-0.337932	-0.0617876	0.160826	0.185186	-0.031585	0.100547	-0.299364	-0.0619255	-0.187809	-0.247861	-0.0351201	-0.35244	-0.487502	-0.0248747	0.578135	-0.142556	-0.0759002	-0.211172	0.00543236	0.0758177	-0.0342694	0.146539	-0.162895	-0.286555	-0.41672	-0.199383	0.169698	0.0427728	-0.152096	-0.169501	-0.466934	0.062494	0.253133	-0.140287	0.129975	-0.116486	-0.080029	-0.196341	0.0977243	0.0304489	-0.1597	0.332841	-0.0832326	0.0603834	0.0865047
-0.477383	0.271526	0.00592367	-0.0626071	0.27996	-0.108511	-0.0652534	0.137635	0.10849	0.172413	-0.0774845	-0.170731	0.04933	0.286783	-0.182619	0.115336	-0.356142	-0.345391	-0.099709	0.524896	-0.145811	-0.0651441	0.339577	-0.00840011	0.0743612	-0.024109	-0.128095	0.27435	-0.291163	-0.125105	0.139659	-0.205888	-0.106588	-0.0750095	0.0822012	-0.508119	0.0760478	0.247668	-0.154386	-0.0289564	-0.40412	-0.144502	0.126762	0.110113	0.0235032	0.0147853	0.177856	0.0472856	0.363815	-0.232726
-0.163503	0.0412642	0.232894	-0.466452	-0.114432	-0.0766807	-0.102689	0.151524	0.189867	-0.155818	0.0710782	-0.267436	0.0069911	-0.119709	-0.190336	-0.218331	-0.306041	-0.348709	-0.304759	0.0520602	-0.0795441	-0.0643136	0.0328436	-0.179249	-0.0202592	-0.0251682	-0.14158	-0.292043	-0.2733	-0.22386	-0.0374987	0.11783	-0.1031	-0.128952	0.22182	-0.301711	-0.0530807	-0.0692088	-0.000794773	-0.0659246	-0.357168	-0.169269	-0.190383	0.113704	0.00485146	0.0966167	-0.281475	0.0440978	0.0909876	0.0160197
-0.489902	0.0887386	0.170256	-0.251531	-0.164303	-0.123513	-0.076792	-0.1033	0.177936	-0.185136	0.113514	-0.274596	-0.32558	0.252745	-0.197801	-0.186585	0.257097	0.158086	-0.0382996	0.578297	-0.116069	-0.0719453	0.35914	0.0193102	-0.138644	-0.0192067	0.0657915	0.181156	0.207916	-0.290174	0.104496	-0.155997	-0.106907	0.40995	-0.110138	0.114501	-0.073275	-0.293295	0.0451305	-0.17532	0.143702	-0.273761	-0.180189	-0.0804624	0.0380852	0.214597	-0.323942	0.215286	0.24186	0.104347
0.16962	-0.298006	0.00371473	-0.364512	-0.149014	-0.103902	0.221908	-0.12166	-0.206001	0.121471	0.111901	-0.0494143	-0.0361562	0.334416	0.0582761	-0.240224	-0.157001	0.149147	-0.0205927	-0.30518	-0.154565	-0.10841	-0.0282443	0.115079	-0.0234661	-0.0325173	-0.00350204	0.278997	-0.383823	-0.361251	-0.114942	0.328635	0.0178269	-0.0477642	-0.115411	-0.0869539	0.0403104	0.266673	-0.0533258	-0.00184112	0.0103742	-0.112798	0.0784188	-0.129158	0.0345435	-0.0507164	0.160764	0.301229	-0.279309	0.117911
-0.41584	-0.232818	-0.19701	1.43206	0.239615	-0.0572759	-0.0959581	0.0422152	0.174332	-0.22097	0.0801486	-0.353507	0.191399	0.220982	-0.174394	-0.183076	0.190208	0.0522258	-0.439022	0.550338	-0.0508995	-0.0721619	0.300217	-0.136363	0.224133	-0.0562247	0.0226419	0.169842	-0.273111	-0.337567	0.0893708	-0.152817	0.123873	-0.0725826	0.168649	-0.00971246	-0.0801096	-0.013124	-0.136978	0.156086	-0.347945	-0.329546	-0.35721	0.0641343	-0.275442	-0.140992	0.194042	0.0586846	-0.135884	-0.278371
-0.136191	-0.117902	0.185298	0.847725	0.263307	-0.067288	-0.0599546	0.123438	-0.267782	-0.31934	0.101202	-0.109893	0.284866	0.251553	-0.224075	-0.162258	-0.421309	-0.0396194	-0.0415712	0.511009	-0.0997591	-0.0665086	0.158113	-0.0336213	-0.00483679	-0.0533287	0.121583	0.173051	-0.29558	0.459807	0.097289	-0.133101	0.0498289	-0.106118	0.188858	-0.061032	0.0784704	0.2785	-0.129235	-0.170416	0.0675853	0.107673	-0.305807	0.0726633	0.0273845	-0.12793	0.307112	0.0562463	-0.16	-0.305701
-0.105475	0.166022	0.228113	-0.289425	-0.11956	0.263545	-0.089011	0.0803608	0.113778	0.169436	-0.118155	-0.321662	0.388919	-0.248025	-0.189844	-0.209043	0.0747653	-0.498671	-0.00333706	-0.21106	0.145642	0.327078	-0.24132	0.103079	-0.176875	-0.0594766	-0.0977948	-0.343507	0.12148	-0.525746	0.0815366	0.323649	0.0488022	-0.141842	-0.102865	0.192881	-0.0904758	-0.0120367	-0.177246	-0.0361783	0.0672519	-0.193443	0.0705295	-0.103724	0.0547041	0.0669398	0.184363	-0.055422	-0.00181303	0.0034418
0.243264	-0.0132208	0.203286	-0.552058	-0.114338	0.128648	-0.0921592	-0.0968287	-0.151576	0.112152	-0.145699	-0.133954	-0.331648	-0.237527	0.21299	-0.148888	0.202203	0.100648	-0.0149579	-0.330868	-0.118052	0.328208	-0.298195	-0.269066	0.235114	0.0866654	-0.127994	0.133318	-0.153141	-0.337836	-0.354945	0.130563	0.0608531	-0.110319	-0.130941	0.137855	-0.0253717	-0.211466	0.194052	0.169051	0.0528908	-0.125474	0.161271	-0.09109	0.00515404	0.0137189	-0.036003	-0.083564	0.0434213	0.0771578
0.249023	0.00661142	0.0120951	1.76972	0.338961	0.125108	0.168721	-0.146035	0.271183	-0.059893	-0.222584	0.293647	0.071987	0.251591	0.168672	0.346779	-0.285935	0.202697	0.173613	0.55731	-0.126279	-0.0898191	0.304549	0.234506	0.165785	-0.0409458	0.102785	0.246618	0.226835	1.81158	0.156309	-0.118965	0.150828	-0.0793586	0.0779168	0.199553	0.104188	-0.260904	-0.139111	-0.0278064	0.015342	-0.0716909	-0.145969	0.0947793	0.0885677	0.0814024	0.188568	0.0357907	0.43764	0.122449
-0.383921	0.0636413	-0.183945	-0.190896	-0.185583	0.423324	-0.0686146	-0.103192	-0.177449	0.105992	0.128838	-0.232998	0.425523	-0.24208	0.0359	-0.160037	0.153187	0.171494	0.138188	0.345816	-0.117938	-0.0959254	0.142051	-0.175149	-0.00308	0.239704	-0.174802	-0.254695	0.253007	-0.400894	-0.0981378	-0.0173804	-0.135491	-0.112226	-0.106675	0.0920036	-0.0115206	0.329389	0.289108	0.256682	-0.369135	-0.1695	0.148716	-0.0504403	0.0687096	-0.0942221	0.0211728	-0.074072	-0.19683	0.0988415
0.190346	0.156649	0.228861	-0.400549	-0.112367	-0.079023	0.0520521	-0.131721	0.171877	0.108531	-0.113926	0.316542	0.0393133	-0.270727	-0.130919	-0.228837	-0.196961	0.093926	0.0449633	-0.393409	0.0179973	0.291105	-0.228932	0.0164068	0.283302	-0.0361955	-0.165843	-0.138019	0.26324	0.601571	-0.121668	-0.130952	-0.0986504	-0.094698	-0.0957491	0.0568918	-0.0538405	-0.207831	-0.0490612	0.00838279	0.131574	-0.0861227	0.172219	0.117233	0.0157939	-0.13972	0.148882	-0.0863637	-0.254689	0.122276
0.159845	-0.23515	-0.0690367	-0.276323	0.248005	0.365321	-0.0128612	-0.0948729	-0.195803	-0.13254	0.149894	-0.0793393	-0.0490177	-0.0660092	0.0925652	0.165402	-0.3535	0.25174	0.1873	-0.296776	-0.00499601	0.19244	0.145807	0.00693972	0.0656308	0.0209979	-0.161371	-0.105368	0.268946	-0.615249	-0.0131737	5.9677e-05	-0.0913978	-0.128965	0.228729	0.152594	-0.0566975	0.290557	-0.156244	0.189504	0.137763	0.174662	0.194308	0.0537675	0.01981	-0.158289	0.335477	-0.0844164	0.223486	0.102412
-0.0389064	0.266049	-0.0764249	-0.525098	-0.166557	0.0703598	-0.0356159	0.110347	-0.230165	0.130498	0.134424	0.334303	-0.271809	-0.185168	0.0927192	0.131988	-0.167067	0.111293	0.0936677	-0.0331875	0.0273189	-0.0854711	-0.377939	0.27772	-0.0887484	-0.0423523	-0.111292	-0.172949	0.184907	0.994133	-0.0534111	0.051237	-0.1232	-0.10409	-0.199516	0.0210347	-0.0167325	0.059196	0.214757	-0.172006	0.15064	-0.0890655	0.0994865	-0.136453	0.0168799	-0.104585	-0.169867	-0.0674071	0.0394507	0.104143
0.0323951	0.0712334	-0.06135	-0.514631	0.362383	0.101058	-0.064739	-0.124422	-0.149301	0.176589	-0.214767	-0.198607	-0.0393628	0.319575	-0.0102801	0.199531	0.0295901	0.211027	-0.0111062	0.0552973	-0.104299	-0.0690781	0.421209	0.00364881	0.069291	-0.0768661	-0.119117	0.244664	-0.118929	-0.542014	-0.370247	-0.0542815	0.110327	0.132836	-0.135583	0.161433	-0.029576	0.100756	-0.14293	-0.171277	0.123234	0.395791	-0.110807	0.0966657	0.0566163	0.00772376	-0.163507	-0.0903087	-0.142455	0.11819
0.202641	0.127329	-0.182473	-0.539539	-0.160243	0.109666	0.115237	0.0470862	-0.260622	0.140809	-0.165265	-0.0928704	-0.277681	0.184377	0.123901	-0.17032	0.199502	0.116477	0.201571	-0.0170217	-0.0224293	-0.0661554	-0.261407	-0.0261991	-0.108525	-0.191729	-0.0833001	-0.246745	0.114443	-0.583853	-0.0194248	0.17034	0.13323	0.123673	-0.14035	-0.168103	0.00168346	-0.275135	-0.148216	-0.20307	-0.508891	0.373756	0.0728289	-0.0622612	0.071818	-0.151513	-0.112668	-0.0690887	-0.110699	0.0779259
0.323306	0.17243	-0.205154	-0.401223	0.0603534	-0.115896	-0.110953	0.125682	0.258553	0.141194	-0.130287	0.268001	-0.0930213	-0.148373	0.0509378	-0.246186	0.241732	0.0845778	0.0590622	-0.406145	0.0723262	-0.102583	-0.213561	-0.314376	0.0232706	-0.053652	-0.153027	0.222211	-0.0889663	-0.679123	-0.137623	-0.0363483	0.0353239	0.162892	-0.0872058	0.179222	-0.0592015	-0.335947	-0.0859522	-0.0938314	0.0872204	-0.163763	0.0844017	0.0852536	0.0362202	0.0897501	-0.275525	-0.0816563	-0.249626	0.111061
-0.164117	0.169086	-0.0779241	-0.496979	-0.099433	-0.0898471	-0.0162809	0.069085	0.175704	0.220162	-0.151107	0.187127	-0.146534	-0.0798895	0.0700192	-0.285874	-0.258603	0.0543896	-0.119713	-0.128632	0.26166	0.305201	0.32273	-0.0465469	-0.116857	-0.0301545	-0.0733501	0.261484	-0.03659	-0.346067	-0.285487	0.237709	-0.0475102	0.264199	0.0704701	0.167795	-0.0575698	-0.285966	0.278929	-0.144348	0.085896	-0.0948784	0.0780274	-0.139607	-0.156945	-0.146805	0.00660788	-0.0668731	0.141455	0.142444
0.248617	0.208792	0.142233	1.56515	0.0951443	0.313705	-0.0798415	0.092131	0.232465	-0.122887	-0.132895	-0.0637349	-0.0533183	0.247909	0.200576	0.282038	0.189272	0.134426	0.161147	0.55741	-0.107696	-0.0309014	0.329189	0.137346	0.184328	0.0916454	0.158137	-0.1921	0.240521	-0.170917	0.146026	-0.141169	0.138273	0.310656	0.0551704	0.265355	0.096227	0.0635828	-0.121542	-0.0267098	0.0902044	-0.342841	0.190426	0.13356	0.050809	0.202686	0.0803987	0.230679	0.322655	0.131721
0.0125766	0.0268127	-0.0233864	-0.547876	-0.121742	0.0939517	0.143356	0.14698	-0.295645	-0.150224	0.149223	0.240668	-0.309858	-0.129923	0.218515	-0.147609	0.240627	0.0255979	0.181293	-0.337294	-0.131554	-0.0783928	-0.330832	-0.26478	-0.0075701	-0.184216	0.0939134	-0.240882	-0.120013	-0.42268	-0.0853949	0.237982	-0.195181	0.394958	0.118699	0.0611117	-0.0595845	0.369854	0.129817	0.234259	-0.361797	0.138789	0.10544	0.0932305	0.0273692	-0.075754	-0.247694	-0.0792875	-0.128405	0.0883886
-0.274234	0.0288603	-0.194422	-0.527665	-0.120452	0.0187462	0.158714	0.0718412	-0.223315	0.169655	-0.101227	0.287433	0.396751	-0.0614293	0.0292526	-0.0409687	0.267608	0.0844901	0.249501	-0.321099	-0.104627	0.424666	-0.196725	0.00350019	-0.117307	-0.0397975	-0.0782842	-0.276595	0.25588	-0.460165	-0.350631	-0.154152	-0.174743	0.242742	-0.0805909	0.114158	-0.0809668	0.0572165	0.256124	0.246466	-0.199311	0.26869	0.172834	-0.043015	0.0504509	0.0807088	0.113303	-0.0703325	-0.116401	0.100219
-0.517712	0.209336	0.227641	-0.0142802	0.0608085	0.0459306	-0.0513809	0.0925157	-0.151013	0.0554675	0.00171733	-0.338483	-0.302874	0.309599	-0.243603	0.269741	0.138058	0.192085	-0.0428992	0.0944106	0.0551094	-0.0285388	0.0800191	0.152923	-0.121041	-0.0378443	0.0135717	-0.104642	-0.0014132	-0.551653	-0.0613234	-0.185694	0.0415113	0.322765	0.126102	-0.391858	-0.0461082	0.295071	-0.20694	-0.036003	0.142133	-0.130549	-0.24887	-0.0233908	-0.266555	0.239573	-0.40658	-0.0730707	0.177775	0.111664
0.275891	0.0457942	0.303201	-0.488176	0.0763481	0.0388234	-0.0347644	-0.0486042	0.199636	-0.109331	0.0742325	0.119282	-0.345203	-0.226673	0.233121	-0.199158	0.199314	0.0112548	0.20189	0.221482	-0.138611	-0.0712984	0.428778	-0.213135	-0.174507	-0.216826	0.12621	-0.101152	0.238053	-0.567024	-0.0123533	0.227264	-0.152255	0.176661	-0.0686476	0.0365177	-0.0593395	-0.305919	0.204643	-0.163508	0.110098	-0.102774	0.0703908	-0.111736	0.027448	0.0977195	0.161908	-0.0620145	0.235963	0.0988636
-0.107429	0.214272	-0.186922	-0.317336	-0.110967	-0.12031	0.157563	-0.0775856	-0.0408212	0.181091	0.161986	-0.352546	-0.0506797	-0.201882	-0.0294403	0.295588	-0.133424	0.131193	0.124952	0.173611	0.0122514	-0.0595612	-0.280351	0.0859535	0.0289946	-0.0275867	0.0982698	-0.0972541	0.26737	-0.674154	0.121427	0.152478	-0.109976	-0.0981363	0.243716	0.0706884	0.00969862	-0.267594	-0.124127	0.00106174	0.162386	-0.26862	-0.123819	-0.135679	0.0792699	0.0292569	-0.0495594	-0.0648558	-0.127401	0.116278
-0.486143	-0.356175	-0.192522	-0.269374	0.279428	0.176264	-0.0857842	0.0631466	0.104377	-0.315932	0.0376695	-0.0628023	0.220746	0.253257	-0.22271	0.0483319	-0.337895	-0.447539	-0.320164	0.0537509	-0.00600995	-0.0868704	0.114931	-0.0282337	0.0405562	-0.0311819	-0.136872	-0.148111	-0.280116	-0.582867	0.117745	-0.215136	0.0380311	-0.137062	0.201878	-0.392053	0.0122385	0.0455215	-0.163593	-0.0874907	0.0862606	-0.158706	0.0533502	0.105133	0.0845908	0.236709	0.00735219	0.0467002	0.422611	-0.217173
-0.419744	-0.0215607	-0.0428033	-0.454672	-0.019158	-0.290636	-0.104926	-0.103809	-0.268327	0.180715	-0.149057	0.173926	0.0342575	0.294359	0.149624	0.0998701	-0.414143	0.138015	-0.240638	0.393607	0.275326	-0.116338	0.367772	0.233766	0.0444893	0.00234638	0.104709	-0.171263	-0.356431	-0.656791	-0.0698371	-0.131565	-0.099511	-0.111485	0.0552484	0.121222	-0.0911919	-0.00375125	-0.172624	-0.055327	0.049216	-0.172186	-0.154772	0.122807	-0.277652	-0.125858	-0.0944459	-0.0853976	-0.125968	0.0929021
0.333636	0.226449	-0.180419	-0.412579	-0.00198484	-0.407628	-0.070338	0.126863	0.174863	-0.0935757	0.027061	0.0842121	-0.00671848	-0.207228	-0.13963	-0.232649	-0.260251	0.200234	0.0559788	0.218346	-0.0610366	-0.0712261	0.156106	0.287821	-0.00749168	-0.0905203	-0.151818	-0.0831211	-0.274684	-0.442948	-0.0565437	-0.211821	0.128935	-0.121584	-0.136492	-0.0280951	-0.0898885	0.0157879	-0.178605	-0.0736814	0.0301278	-0.101313	-0.172139	0.0883429	0.0145472	-0.0404957	0.214352	-0.0756243	-0.154801	-0.217252
0.144923	0.0398236	0.287505	-0.367784	-0.0769696	-0.0809162	-0.0860983	-0.0864005	-0.225193	0.125664	-0.00266249	0.109236	-0.0355813	-0.186429	0.080879	-0.169739	0.250931	-0.105389	0.0414752	-0.0438969	0.313554	0.272312	0.125425	-0.199452	0.0241667	-0.0204638	-0.152867	-0.269555	-0.299222	-0.576379	0.142174	0.12279	-0.175958	0.470816	0.0279869	0.0831503	-0.00561605	0.412944	0.0389261	0.226501	-0.452577	0.171422	0.127864	-0.269429	0.0485622	0.0542488	-0.000112531	-0.0766866	-0.024245	0.0458819
0.338344	-0.357868	0.273764	-0.0753902	-0.141321	0.205189	-0.106643	0.152772	0.137426	-0.146267	-0.147211	-0.195859	-0.0340538	0.272522	-0.17377	-0.14069	0.250161	0.104149	-0.0284268	-0.268891	-0.161976	-0.0801982	-0.258553	-0.0142588	-0.137642	-0.240944	-0.100758	0.247534	-0.296523	-0.460352	-0.0495476	-0.134047	-0.0852282	-0.142944	-0.109518	-0.152514	0.0711371	0.0213715	-0.162955	-0.16399	0.0371795	-0.25837	-0.152775	0.0450919	-0.175326	0.0172291	-0.175824	0.0626537	-0.153888	-0.151119
0.266397	-0.315828	-0.0103345	-0.493463	0.00927581	-0.0544228	-0.074494	0.152853	0.0880561	-0.0247283	-0.0634295	0.340863	-0.0429908	0.144227	0.122639	-0.2341	0.152322	-0.479879	0.236287	0.501654	0.0403547	-0.0828053	0.0599694	0.153221	0.153018	0.36721	0.0589737	0.164429	-0.182375	-0.117899	-0.194476	-0.173246	0.155952	-0.139675	-0.141454	-0.368224	-0.0597935	0.0370622	-0.0283185	-0.0332881	0.0897291	-0.132687	-0.315685	0.101128	0.0664748	0.0753542	-0.0560113	0.0457511	0.368466	0.113465
-0.421951	0.0357398	-0.0622851	-0.17302	0.0558431	-0.0865753	-0.0926222	0.147993	-0.327421	-0.155748	-0.000429615	-0.27019	-0.0126146	0.301355	-0.214295	0.14882	-0.345932	0.0855825	-0.0962785	0.43579	-0.134112	-0.109021	0.180759	-0.254695	0.0928727	-0.0098299	-0.153037	-0.204347	-0.338038	0.39856	-0.0866865	-0.152273	-0.113907	0.272044	0.130272	0.192322	-0.00606309	0.148109	-0.126881	-0.169784	0.0135811	0.125421	0.1098	0.11205	0.0526736	-0.0122076	-0.320606	-0.0842052	-0.109034	-0.203688
-0.338241	0.0114131	-0.194798	-0.480891	-0.105103	0.102152	0.0199171	0.0495995	-0.268226	0.0028814	0.094548	0.369615	0.252843	-0.124213	-0.207064	-0.146665	0.209679	0.0476553	-0.296319	0.26431	-0.0136729	0.274798	-0.249441	-0.165025	0.00280564	-0.0225324	-0.165369	-0.200567	0.234576	-0.283561	-0.0122068	0.00265546	0.0656398	0.376555	0.1263	0.162735	0.100745	-0.274586	-0.0184965	-0.0855258	0.106353	0.351127	-0.135284	0.07876	0.0680568	-0.153879	-0.055147	-0.0761055	0.163396	-0.25795
0.173131	0.0256938	-0.205688	-0.56259	-0.151636	0.147494	0.043086	-0.0803373	-0.157892	-0.036289	-0.181653	0.181426	-0.138035	0.0869185	0.210584	0.103475	-0.188577	0.163625	0.121276	0.0766815	-0.13293	-0.10528	0.150965	0.18136	-0.0372553	-0.0607826	-0.0736679	-0.316118	0.273664	-0.667255	0.120174	0.336908	0.0911392	-0.0305813	-0.0840851	0.192046	-0.0380665	-0.291932	0.0211431	0.252258	0.0736557	-0.238284	0.124689	0.105152	-0.216652	0.0236247	0.202735	-0.0542376	-0.259239	0.0682547
0.26732	0.0916242	0.247007	1.66616	0.359336	0.276699	-0.0749481	0.087732	0.147155	0.0668158	-0.010657	0.306868	0.294955	0.156454	0.0883873	0.315807	0.194277	0.17263	0.188346	0.285487	0.0370861	-0.0349049	0.132632	0.233724	0.0361509	-0.00604446	0.115825	0.254727	0.28907	1.94795	0.120676	-0.119922	0.167982	-0.0310132	-0.115997	0.308392	0.0759322	-0.046717	-0.0731446	0.207456	-0.43957	0.253112	0.149895	0.103651	-0.282496	0.155242	0.127349	0.234631	-0.116877	0.172441
-0.128935	0.357356	-0.07487	0.0747941	0.108219	-0.101942	-0.0603488	-0.0998369	-0.252482	0.137177	-0.156622	0.204361	-0.0733944	0.224069	0.0683096	0.0492715	-0.272017	0.179784	0.0234198	0.186494	0.0379396	-0.0864223	0.327348	-0.237234	-0.136471	-0.0147916	-0.0893719	-0.14329	-0.108638	-0.580741	-0.118465	0.0633608	0.174322	-0.0916634	-0.0882767	-0.0697345	-0.0303344	-0.285027	-0.184613	0.176226	0.158941	-0.150206	-0.27161	-0.316575	0.0172428	0.109725	0.190582	-0.0561189	0.359306	0.0943501
0.182927	0.204439	-0.169591	1.62653	-0.0716303	0.289613	0.137771	-0.095462	0.225307	0.132253	-0.0152499	0.209967	-0.0207783	0.231177	0.189494	0.152138	0.122537	0.170813	0.23552	0.507974	0.0950507	0.00833674	0.397177	-0.00969925	0.022877	0.0514522	-0.12036	-0.120642	0.188635	1.68337	0.120599	0.106037	0.172775	-0.0870158	0.0545244	0.284577	0.106667	0.212499	0.182992	0.152447	-0.482465	-0.107426	0.32487	-0.116418	0.0515729	0.0927256	0.0295123	0.211604	0.386783	0.149886
-0.313515	-0.336399	0.182323	0.113207	-0.117568	-0.128478	-0.0920575	-0.0488218	-0.229024	-0.320126	-0.147977	0.125799	-0.0901247	0.250397	-0.160301	-0.202877	-0.166066	0.0989633	0.154578	0.700348	-0.118743	-0.112548	0.378472	-0.0857716	0.0529501	-0.207256	0.103332	-0.119128	-0.147321	-0.409948	-0.0818639	-0.167117	0.139604	0.0981103	-0.110435	0.274971	-0.0148339	0.119428	-0.146008	-0.067486	0.0873714	-0.101308	-0.0259357	-0.102833	0.0194908	-0.150284	0.140155	-0.0930858	-0.25582	-0.199316
0.186142	0.221909	0.237947	-0.449553	0.0828164	0.438149	-0.0710285	-0.00240699	-0.0261179	0.154284	0.179847	0.213593	-0.0461696	-0.0779441	-0.0193284	-0.256929	0.160123	0.134935	0.150139	-0.322094	-0.0286528	-0.0650634	0.118824	0.152803	0.0141415	-0.19012	0.156194	0.24345	0.00524992	1.95076	0.190387	0.290359	0.0553402	0.293573	0.114728	0.0877592	-0.0581942	-0.252189	-0.174206	0.0206391	0.048568	-0.115436	0.414342	0.0461092	0.0939749	-0.148816	0.203271	0.0560328	0.293202	0.112019
-0.156606	-0.197557	-0.13374	-0.317147	-0.190528	-0.109075	-0.0700154	-0.133746	0.209354	0.126698	0.0939709	0.327934	0.0775945	-0.246258	0.0229649	0.132078	0.21895	0.153957	-0.0663487	-0.210021	-0.127426	-0.0703631	-0.348387	-0.0339289	-0.11154	-0.0283767	-0.152741	0.194701	-0.102004	0.118578	0.120777	0.0141566	-0.11842	-0.13533	-0.256681	-0.12964	0.0418076	0.0674768	0.217587	-0.062611	0.135738	-0.168682	-0.0999963	-0.172542	0.0284417	0.0376922	-0.151125	-0.0669288	0.306723	0.0991971
0.161658	-0.28848	0.184094	-0.524577	-0.108408	0.134879	-0.0830931	-0.116327	-0.296435	-0.306507	-0.15476	0.115609	-0.250386	0.185281	0.0176505	0.0443025	0.212883	-0.0779548	0.172442	0.110613	0.0494998	-0.0983318	-0.260882	-0.26374	-0.0782475	-0.127406	-0.0739336	-0.205971	-0.143965	2.01725	-0.014524	0.312388	-0.112861	0.249879	0.133406	-0.0554472	-0.0472667	-0.222307	-0.0255106	-0.0159113	-0.5413	0.0726552	-0.00424363	0.0836004	0.0232595	-0.0822347	-0.243052	-0.0772334	-0.217171	0.0946082
-0.273665	0.199245	-0.0653575	-0.437794	-0.0134527	-0.0406318	-0.111034	0.0849437	-0.0486329	-0.154906	0.0722232	-0.291014	0.0347189	0.223942	-0.263896	-0.101176	0.229993	0.103668	-0.394935	0.46598	0.259774	-0.00872671	-0.127932	-0.244218	0.251251	0.0100837	0.0966172	-0.375928	0.029599	-0.292232	-0.0771056	-0.0211139	-0.0916038	-0.0792563	-0.0304241	-0.355411	-0.0552055	0.155498	-0.143793	-0.0469167	0.111671	-0.307296	-0.216337	0.0212068	0.0258691	0.0714424	-0.224719	0.0633341	-0.254076	0.117824
0.297036	0.0682974	0.219274	-0.239189	-0.137905	0.419511	0.202222	0.116518	-0.232737	0.0879923	-0.00480705	-0.192495	-0.141846	-0.21531	-0.163702	0.0265005	0.138023	0.113343	0.218966	-0.325037	0.177632	-0.0840672	0.0760446	0.243814	0.00840443	-0.0129554	0.0566397	0.234772	-0.0647418	-0.101285	-0.0556161	0.178294	0.0761011	0.0707793	-0.14163	-0.314284	-0.0054884	0.00858824	-0.167537	0.207019	-0.393433	0.0887448	0.141041	0.0561611	0.027108	0.122648	-0.0333904	0.0429444	0.142115	0.0845844
-0.351962	-0.00408728	-0.0192108	-0.0698004	-0.117846	-0.411115	0.223526	-0.0797182	0.128852	-0.18604	0.159412	-0.331985	-0.0479245	0.30731	0.277072	0.192	-0.204774	0.000617067	0.115054	-0.290984	0.00372572	-0.10326	-0.269233	-0.241177	0.0555095	0.240704	-0.0967834	0.352772	0.0488111	-0.0936663	0.174736	-0.119865	0.13113	-0.122155	0.201086	0.0789462	-0.0450315	-0.220721	-0.117032	-0.126426	0.0647174	-0.311648	-0.0883888	0.132251	0.0394716	0.086948	-0.0342798	-0.0672522	-0.234322	0.130385
0.123262	0.196722	-0.057397	-0.574619	-0.09931	0.416898	-0.0452776	-0.0754983	-0.287447	0.157623	-0.189203	0.126798	-0.127084	-0.162683	0.228965	-0.165741	0.171977	-0.377041	0.212893	-0.0123307	0.0263146	0.337745	-0.350466	-0.219771	-0.0865016	-0.129225	0.0037884	-0.0880417	0.241477	-0.616883	-0.0846694	0.22631	-0.151558	0.345587	0.160776	0.0994797	0.00823779	-0.278731	0.149436	0.187216	0.0675067	0.115738	0.46242	-0.233621	0.0318171	-0.164332	-0.259167	-0.0818716	-0.0779064	0.0914646
-0.361837	0.0720849	-0.143759	1.60019	-0.167592	0.166674	0.021185	-0.0560344	0.233237	0.154119	0.123505	0.278435	0.279429	-0.0896864	-0.0148561	0.27124	0.177451	0.148463	0.197708	-0.187872	-0.0984273	-0.0988316	0.186106	-0.0426236	-0.157417	-0.0503752	0.11275	0.246546	0.346258	1.89079	0.111604	0.140334	0.137828	-0.101736	0.239471	0.0679818	0.0890632	-0.301973	-0.146476	-0.132075	0.0851381	0.0978973	0.384523	0.0823847	0.060882	0.206462	-0.332584	0.212697	0.048966	0.142752
-0.441094	-0.307717	-0.154512	0.119277	-0.133172	0.197594	0.0493842	-0.106543	-0.0795264	-0.203636	0.151325	0.375516	0.158017	0.316195	0.0566605	0.279796	0.199383	0.110506	0.211855	0.0765856	0.0314611	-0.0806173	-0.304643	-0.0424804	-0.0523006	0.01985	-0.168443	-0.0711983	0.197967	-0.324499	0.0975583	-0.14894	-0.151754	-0.138008	0.0359595	0.264247	0.0688445	0.337709	-0.118914	0.260043	0.125494	0.256175	0.0849287	0.0889317	0.046876	-0.0293137	0.0642265	-0.0568364	0.0608634	0.0825811
-0.249964	0.0693939	0.324625	-0.234293	-0.128988	-0.300551	-0.0596829	0.18663	-0.266245	-0.285273	0.00736016	-0.233583	0.0593416	-0.212386	0.0952165	-0.170183	-0.0621364	0.141054	-0.0477471	0.433339	-0.0850784	-0.0899052	0.0732554	0.228512	-0.0534012	-0.00386398	0.0395593	0.239485	-0.334723	-0.488706	-0.0349022	-0.248614	-0.0790182	-0.109082	0.167607	-0.419213	-0.0432953	0.366303	-0.0992644	-0.0595922	0.049478	-0.11607	0.0380447	0.0934622	-0.29206	0.222465	0.131707	-0.0790035	0.352609	0.0835742
0.273388	0.0171238	-0.223275	-0.524228	-0.138944	-0.072487	0.134321	-0.0928292	-0.23874	0.134686	-0.0328074	-0.289017	0.0625587	-0.24285	0.0337741	0.266246	0.183959	0.13478	0.244375	-0.296259	0.387606	-0.0887014	-0.117786	0.146791	0.218098	-0.0490826	-0.0884776	0.221797	-0.359802	-0.623432	-0.077384	0.084741	-0.119325	-0.123518	0.0202269	0.0750135	-0.113771	0.0119003	0.250724	-0.0220202	0.0729863	-0.11073	0.0730131	-0.0415136	0.0163813	-0.143275	0.19656	-0.0796138	-0.126166	-0.266333
0.333864	0.0383461	-0.146454	1.41765	0.0877987	-0.396027	0.191853	-0.127113	0.0765524	-0.00638579	-0.18142	0.349591	-0.307964	-0.216626	-0.259029	0.256752	0.174412	0.0957056	0.0963902	-0.416376	-0.150145	-0.0479222	-0.359371	0.188615	-0.136235	-0.0247385	-0.0902128	0.290575	-0.0766034	-0.0985134	0.156148	-0.130118	0.017786	-0.147067	-0.158413	0.0928522	-0.029817	0.242749	0.176879	-0.150924	-0.140627	0.39781	-0.0761936	0.101867	0.0430078	-0.153342	-0.045313	-0.0761427	0.281156	0.0697187
0.278806	-0.151972	-0.197715	1.59874	0.229654	-0.0368427	0.11233	0.0913224	0.213679	-0.0219279	0.104547	-0.3687	0.238799	0.248841	0.0442983	0.111935	0.15829	-0.473626	-0.17008	0.391605	-0.107969	-0.0566129	-0.0527979	0.102886	0.044927	0.0034834	0.149078	0.238406	-0.00579428	2.02427	0.0957889	-0.0275103	0.104386	0.212146	0.200795	-0.252684	0.00342927	0.230328	0.0126977	-0.00923938	0.114163	-0.0884268	-0.374711	0.0861409	-0.238283	0.0989911	0.178364	0.272854	0.399787	0.115268
-0.166978	0.0603434	-0.0888637	-0.497245	-0.143876	0.0354364	-0.0967701	-0.0920922	0.00993737	-0.00978628	0.129526	-0.0815277	-0.0641874	-0.294263	0.0178456	-0.171986	0.03078	0.14979	0.248754	-0.370382	-0.0242008	-0.0246401	-0.342699	-0.196045	0.0411255	0.316076	-0.138399	-0.270145	0.227908	-0.563556	-0.0113247	-0.144178	0.0871579	-0.0884712	-0.14407	0.10262	0.0567776	0.140792	-0.103679	-0.191262	0.122932	0.474934	0.0405176	-0.135384	0.0950633	-0.146229	-0.245932	-0.0753401	0.0716245	0.0176126
0.135877	-0.2021	-0.1617	-0.450314	0.261602	0.447016	0.0152895	-0.0915699	-0.23817	0.170079	-0.0575862	-0.239877	0.351178	-0.229275	-0.114331	-0.259042	-0.250314	-0.0251672	-0.342767	-0.301216	-0.146171	-0.0746773	-0.218818	-0.035842	-0.0546011	-0.194269	-0.0614409	0.290255	0.416024	-0.63871	-0.0314205	0.355224	-0.0941675	-0.119485	0.060498	-0.0675157	-0.0657293	0.0667146	-0.152304	0.135479	0.122758	-0.0773188	-0.411857	0.071218	0.0262738	0.0423162	0.140083	0.049398	-0.263981	0.125421
0.000627741	-0.334346	0.226647	-0.507323	0.236554	0.076533	-0.124071	0.106095	-0.0300071	0.129714	-0.126536	0.187409	0.25454	-0.207618	-0.194029	0.0830296	-0.35069	-0.466007	-0.0877642	-0.3525	0.208029	-0.0645014	0.368066	-0.0562345	-0.136304	-0.0536877	-0.0930566	-0.26608	-0.318948	-0.5445	-0.0890459	-0.17768	0.069445	-0.141691	-0.143055	0.0926377	-0.0632109	0.0762137	-0.156397	-0.118081	0.0585121	0.355006	-0.384434	0.0359215	0.0610585	-0.178232	-0.0362873	-0.0860539	-0.130654	-0.190604
0.0724153	0.166293	-0.193312	-0.509199	0.0901792	0.0750764	-0.0775248	0.144876	0.207408	-0.286766	-0.182712	-0.0827621	0.0432307	0.200954	-0.210526	0.393259	0.156355	0.138002	0.00843075	0.0438073	-0.0459681	0.0126245	0.42144	0.232096	-0.108317	-0.0773867	-0.107259	-0.338614	-0.155966	-0.583311	0.108173	0.164364	0.0165757	-0.0616753	0.195137	0.106969	-0.0959434	0.161116	-0.020871	-0.0668368	-0.249197	-0.127124	0.0453929	0.0577	0.0625304	-0.0997005	-0.356518	-0.0776498	-0.277988	0.117371
0.130023	-0.236625	-0.198723	-0.342162	-0.148371	-0.115003	-0.119057	0.100115	-0.221996	-0.0916148	0.113524	-0.307071	-0.00136118	0.273594	0.0601128	0.0513107	0.0497306	0.0601554	0.00151158	0.0700514	-0.0792202	0.210265	0.421687	-0.214611	-0.136444	-0.0806354	-0.0882028	-0.159504	-0.0808203	1.26589	-0.0381645	-0.0314818	0.164185	-0.106954	-0.137937	-0.0234504	-0.000213376	0.396216	-0.175596	-0.0621057	0.167162	0.425926	0.1415	0.0783374	0.118834	-0.171468	-0.267195	0.0510457	-0.231138	0.11282
0.0198605	0.258538	-0.0294821	-0.44964	-0.117619	-0.0933329	-0.131871	-0.0818726	0.13805	0.143923	-0.178631	0.277518	-0.228894	-0.209336	0.218705	0.0525762	-0.0914597	0.12766	0.181416	-0.0641169	0.0661295	-0.0654113	-0.164492	-0.318461	-0.10232	-0.0460307	-0.0735264	0.206307	-0.087634	-0.100296	0.154106	0.342754	0.0328425	0.450162	0.0684852	-0.254622	-0.038358	0.285395	-0.0579157	-0.050509	0.0960648	-0.126308	0.387514	-0.326765	0.0405719	-0.106706	0.0241116	-0.0751721	-0.207613	0.0719756
0.172581	0.018897	0.341235	-0.542126	-0.120905	-0.0634236	0.207218	0.0791387	0.222056	0.152468	0.126334	-0.102128	0.0805864	-0.272996	0.0724697	0.221993	0.124859	-0.125296	0.0721687	-0.404923	0.266117	0.313144	-0.0553045	-0.0265976	0.125559	0.0580538	0.0861578	-0.20735	0.228459	-0.376862	0.113525	0.0385375	-0.132533	-0.139292	-0.111119	0.114836	-0.0829164	-0.261549	-0.112369	0.0136185	0.104869	0.22933	0.136243	0.137914	0.0736161	-0.10726	0.137397	-0.071273	-0.227246	0.0272162
-0.00547912	-0.417855	-0.0460972	-0.403018	-0.0363235	-0.0856735	0.225466	-0.0942954	-0.157473	0.154449	0.136532	0.00558345	0.0556419	0.175986	0.204812	0.100099	-0.35933	-0.425818	0.119064	0.200566	0.0444803	0.0116672	-0.16485	0.0246466	-0.0385833	-0.0415495	-0.133288	0.276817	-0.334446	-0.430999	-0.0171876	0.0302914	0.187882	-0.0273687	0.268628	-0.0595079	0.0188965	-0.0410637	-0.145247	-0.188437	0.0986386	0.195758	0.0960446	0.14221	0.0723517	-0.121637	0.170315	-0.0752999	-0.0687713	-0.244843
-0.417706	0.247118	0.398547	-0.216161	-0.0778921	-0.167254	-0.0527483	0.130506	-0.181889	-0.0404873	-0.15323	-0.189519	-0.293003	-0.204499	0.082656	-0.154752	-0.314875	0.092418	-0.0165658	-0.0180895	-0.124878	-0.115086	0.41745	0.208972	-0.0432157	-0.00728843	-0.101369	-0.165794	-0.314626	-0.55132	-0.069061	0.0241103	-0.110215	0.0559699	-0.0968362	0.186638	-0.0813426	-0.106462	-0.210232	-0.150257	0.0283071	-0.162694	0.21462	0.084303	0.0507688	-0.0122077	0.0338078	-0.0852514	-0.126782	0.0658926
0.221734	-0.240767	-0.095077	-0.215147	-0.152426	-0.107862	-0.0906426	0.125095	-0.212277	0.154218	-0.133653	-0.278944	-0.0841556	0.201394	0.0773634	0.0409469	-0.0350731	0.0275923	0.00231069	0.169544	-0.134589	-0.0915768	0.385499	-0.236315	0.368531	0.0759917	0.107795	-0.324966	0.432555	-0.36192	-0.0863851	-0.0182432	-0.0958243	-0.070779	0.233976	-0.351404	-0.0564548	0.100097	-0.18983	-0.00678392	-0.304759	-0.0809664	-0.0780627	0.0994147	0.0708355	-0.165745	-0.0450249	-0.0544896	-0.114667	0.0656287
-0.507721	-0.28938	-0.155494	1.70229	-0.025857	0.127715	-0.074423	-0.0393488	0.0841657	-0.165376	0.0982196	0.208146	0.0665486	0.165933	0.032356	0.00937516	0.200611	-0.420071	0.158947	0.217741	0.127569	-0.0692895	-0.269283	0.188091	-0.137282	-0.0184041	0.0896161	-0.075268	-0.0337195	-0.366547	0.110392	0.117681	0.145569	0.111288	0.206806	-0.467722	0.0928191	0.299298	-0.0365416	-0.1123	-0.518394	0.15411	-0.138256	0.103918	0.109992	0.0904208	-0.169466	0.0347792	0.295825	-0.203542
-0.0355563	-0.342361	0.012963	-0.546812	-0.124035	0.139399	-0.136636	0.00571606	0.131604	0.0161439	0.0868526	0.338091	-0.108819	-0.112951	0.026905	0.0347297	-0.273434	0.0295755	-0.0117098	0.22531	0.0129094	-0.0689835	-0.0847714	-0.198264	0.0253069	-0.0606619	0.116334	-0.264268	-0.344629	-0.200713	-0.0541337	-0.154479	0.0210438	-0.118135	0.019799	0.150258	0.0964937	0.113206	-0.0367523	0.2399	0.12158	0.163211	0.114749	0.11659	0.0835283	-0.151973	-0.30481	-0.0650634	0.265399	-0.230322
-0.030744	0.0172506	-0.145259	-0.281501	0.313365	0.224321	0.188075	-0.101083	-0.336996	0.133195	-0.176429	0.139233	0.155645	-0.212179	-0.173032	0.302596	-0.181398	-0.0869963	0.120204	0.196483	-0.104956	-0.073528	-0.113857	-0.277476	-0.0327739	-0.0354197	-0.144943	-0.181808	0.429775	-0.690022	-0.337479	-0.204534	-0.0987027	-0.0900461	0.192969	0.0403296	0.0934747	0.0505051	-0.0791451	-0.221105	-0.0236762	0.353719	0.231622	-0.0624695	0.0316668	0.0723126	-0.0249658	-0.0796569	-0.10963	0.0867299
0.074286	0.271006	0.22631	-0.410662	-0.083882	-0.0843302	0.175784	-0.0956558	-0.128012	0.128284	-0.00784186	-0.0714309	-0.284463	0.381131	0.0968091	-0.0609953	0.00261499	-0.375883	0.210245	-0.236544	-0.103357	0.389445	0.126228	-0.208218	-0.119318	-0.245	-0.0964668	-0.14711	0.405859	-0.556324	-0.0752293	0.233281	-0.079506	0.431015	-0.0555296	-0.234783	-0.0381802	0.0509359	-0.160835	0.15071	0.149463	-0.0977237	-0.236903	0.111309	0.0103291	-0.176787	-0.0364023	0.287507	-0.176453	0.0806617
-0.123653	0.127439	-0.221784	-0.503108	-0.144505	0.0721959	0.0752718	0.106632	0.125242	0.196864	-0.107003	-0.131417	-0.255	0.108497	-0.170986	-0.144699	0.265668	0.182283	0.178252	0.286559	0.0655187	-0.100438	0.406745	0.0628994	0.0531655	-0.0364773	0.0182809	-0.366674	-0.0846777	-0.582226	0.116547	-0.143781	0.0964027	-0.093708	-0.0309718	-0.0741528	-0.0888703	-0.284472	0.234092	0.0207818	-0.212363	-0.173131	-0.149089	-0.291439	0.0645736	0.0181344	-0.0363487	-0.0804641	-0.123851	0.0709154
0.145363	-0.0594204	-0.0243748	-0.45176	-0.107251	-0.0700931	-0.0945855	0.182867	-0.236501	-0.0770353	0.0058458	-0.190846	-0.0995645	-0.181507	-0.178884	-0.0577053	0.285302	0.0948482	0.00696447	0.590305	-0.100651	0.290235	0.124402	-0.246483	-0.0142936	0.00767391	0.137609	-0.0952496	-0.0695634	-0.472082	-0.111894	-0.184664	0.0761236	0.267951	0.148236	0.116234	-0.0848328	0.0132493	-0.200216	0.188276	-0.158967	-0.196715	-0.127583	0.0824656	0.0139435	-0.184066	0.169889	-0.0850136	-0.254694	0.0715248
-0.336665	0.0379805	-0.199175	-0.507445	-0.116317	-0.128878	-0.109154	-0.035816	-0.0721664	0.195516	0.104498	-0.177162	-0.0195885	0.144643	0.0577943	-0.191297	-0.268493	0.00850274	-0.119394	-0.0931949	-0.138382	0.366187	-0.251911	0.128548	-0.0548818	-0.0713763	0.0710444	-0.103934	-0.233466	-0.500492	0.119058	0.127118	0.202632	-0.112073	-0.11686	0.12121	-0.108017	-0.243169	-0.141181	-0.223492	-0.416238	-0.10595	0.127179	0.128802	-0.229109	0.0773263	-0.0648296	-0.0876869	-0.111526	0.0333124
-0.185229	0.198355	-0.0978876	-0.0726013	0.104209	0.268873	0.0325815	0.107963	0.0831692	0.214754	0.159089	0.156247	0.0542919	-0.202257	-0.0144406	0.0222931	-0.11286	0.127835	0.110367	-0.268692	0.100757	-0.0615083	-0.045653	0.0694127	-0.150983	-0.0862182	-0.0792555	0.286679	0.280125	-0.0089955	-0.0992383	0.145878	-0.128642	-0.0914833	-0.19956	-0.105653	-0.0130131	-0.261429	-0.193534	-0.0147035	0.143833	0.15491	0.190611	-0.0667275	0.103833	-0.19312	-0.128862	-0.0626826	-0.0932207	0.0655645
0.412756	-0.254385	-0.141458	0.452134	0.0638005	-0.339635	-0.0864697	0.0881252	-0.053278	-0.24761	-0.0364844	-0.0893886	-0.102593	0.213621	-0.213244	0.0325702	-0.350625	-0.360096	-0.329905	-0.112514	-0.100731	-0.0381896	0.0859632	-0.049619	0.0319986	0.316023	0.121315	-0.0367534	-0.15669	-0.502207	0.134392	-0.1708	0.0740249	-0.125202	-0.141852	-0.339703	0.0131085	0.0620826	-0.146498	0.189109	-0.365722	-0.290478	-0.318975	-0.0606103	0.0298161	0.111122	0.159117	-0.0653724	0.539805	-0.0989161
-0.234498	-0.276008	-0.0417352	-0.326584	-0.133674	-0.105209	0.249956	0.112404	0.21049	-0.194913	0.109096	0.413056	0.390888	-0.183891	0.154674	-0.0451469	-0.201323	0.0515997	0.161244	0.0889026	-0.106295	-0.0908172	-0.152835	-0.233165	0.287173	-0.0606731	0.0893105	-0.287146	0.251948	0.074552	0.108668	-0.17007	-0.0681213	-0.0721644	-0.20247	-0.370237	0.018672	-0.271587	-0.127395	-0.102296	0.0971359	0.195973	0.0720214	0.118507	0.079899	-0.150782	0.321772	-0.0652414	-0.243813	0.135373
-0.0834804	0.243749	-0.0939281	-0.534978	-0.140749	0.418631	0.172959	-0.131793	-0.189105	0.158565	0.167941	0.192541	-0.0196463	0.313952	0.106837	-0.230631	-0.305995	0.0505936	-0.0815614	-0.310719	-0.133496	-0.115478	0.0808833	0.0143545	-0.126832	0.0771925	-0.097469	-0.1483	-0.182579	-0.679339	-0.27389	-0.0272357	-0.130989	-0.10072	0.0759827	0.146236	-0.00531616	-0.256667	-0.165733	-0.0670641	-0.267039	-0.0955354	-0.00904425	-0.161784	0.0353122	0.0598294	0.157085	-0.0771242	-0.141742	0.108631
0.165227	0.178049	0.31965	0.556702	-0.141104	-0.130141	-0.101555	-0.0686288	-0.237697	0.135943	-0.146935	-0.0543018	-0.186509	-0.262098	0.104089	-0.219941	-0.00321288	0.0848946	0.0385394	-0.339359	0.420998	-0.106007	-0.36425	0.108872	-0.135354	-0.0149466	-0.113591	-0.224133	0.376237	-0.130734	0.160856	-0.175551	-0.133507	0.188162	-0.180816	-0.119007	0.0435587	0.307393	-0.110865	-0.061121	-0.47222	0.0132184	0.110321	-0.0863601	0.0418798	0.061105	0.0148546	-0.0656895	-0.214748	0.0604245
0.192503	-0.286966	-0.173758	-0.364706	-0.148969	-0.152345	-0.0677517	-0.00516996	-0.181564	0.0246273	-0.129384	0.198632	-0.0714099	-0.226651	0.243841	-0.199847	0.280538	-0.386014	0.205629	-0.327429	0.158282	-0.0476602	-0.169974	0.146371	-0.11881	-0.0174513	-0.127631	-0.251736	0.404454	-0.0904896	-0.0573227	0.10594	0.0479686	-0.137018	-0.20938	0.0582108	0.0661545	-0.029452	-0.156708	-0.0657253	0.0653512	0.171939	0.108188	0.0306633	0.00615984	-0.100138	-0.035961	-0.0696519	0.348079	0.0787556
-0.18473	0.0364266	-0.033798	0.512633	-0.0937132	-0.132382	0.179634	-0.163776	0.232633	0.204636	-0.0721671	0.148599	0.0406796	-0.235305	-0.00664172	-0.220551	-0.328062	-0.363031	-0.097391	-0.181021	-0.0271807	0.0174585	-0.300838	-0.240245	-0.0306985	-0.184043	-0.159286	-0.301283	-0.0824778	-0.533421	-0.143901	-0.171133	-0.107055	-0.118188	0.00365744	-0.118479	0.0242029	0.0953989	0.291031	0.259315	-0.0608378	0.054256	0.0511457	0.0925148	0.0382513	-0.0309928	0.105261	-0.0831204	-0.114515	0.0264016
-0.059698	-0.00881787	-0.00124391	-0.466548	-0.108568	0.047769	-0.0251526	-0.0170451	-0.0474761	0.149582	-0.103968	-0.266254	-0.0988738	-0.0239059	0.218344	-0.181543	0.167347	0.0190234	0.238002	0.244877	-0.111228	-0.0919532	-0.226381	0.084119	-0.122449	0.0939873	-0.101393	-0.111813	-0.0757568	-0.450567	-0.0548311	0.114914	0.125245	-0.0264786	-0.106321	0.0633107	-0.05307	0.0560755	0.277345	0.189	-0.397872	0.0864206	0.0766268	-0.108336	-0.0202565	-0.105723	-0.243191	-0.0781155	-0.194863	-0.208683
-0.159228	0.0835835	0.205581	-0.292302	-0.104604	-0.131335	-0.0595177	-0.126493	0.193572	-0.214314	-0.130858	0.0834362	-0.234883	0.135903	-0.182827	-0.273569	-0.35795	0.154709	0.128244	0.13315	0.0338702	-0.0803507	-0.0241837	-0.294639	-0.022015	-0.0381621	-0.0817295	0.146456	-0.067711	-0.395907	-0.0781736	0.0219627	0.0639229	-0.130047	0.225872	-0.349273	-0.0726453	-0.0318583	-0.160824	-0.0532725	0.149947	0.41901	-0.158222	0.0959296	0.0250594	0.0692453	-0.106828	0.0515207	-0.204694	-0.195049
0.255448	-0.0387663	-0.0690137	-0.50304	-0.178433	-0.0857212	-0.113284	-0.134114	0.155686	0.012387	0.107644	-0.22054	0.0174014	-0.205175	-0.23036	-0.198088	0.264711	0.200367	0.0205958	-0.436585	-0.133076	-0.114027	-0.183034	0.202872	-0.162571	-0.209448	0.0607656	-0.197514	-0.0940004	-0.393938	-0.0986094	0.0489	-0.0996118	-0.162963	-0.129283	-0.0136508	-0.0944516	0.188179	0.00286669	-0.061769	0.130877	-0.111949	-0.206747	0.108056	0.0542373	-0.189662	-0.327532	-0.0748893	-0.29112	-0.188785
-0.455721	0.0651804	-0.0586394	-0.408446	-0.0681714	-0.0994374	-0.0360092	0.0970065	-0.235746	0.131075	0.114966	-0.260938	-0.0224522	0.292571	-0.228119	-0.113058	0.120134	-0.0948433	0.150731	0.231479	-0.098357	-0.0707622	0.0390462	0.0160363	0.19602	-0.0399257	0.0557231	-0.352379	-0.234529	-0.528054	-0.0600876	-0.140753	0.138933	-0.0510962	-0.113194	-0.0960986	-0.0138783	-0.265123	-0.0835969	-0.080292	0.0722764	-0.143273	0.38439	0.1321	0.0593574	0.0122744	0.128924	-0.0711326	-0.113349	0.074388
0.23077	0.034633	-0.0928343	-0.257238	-0.117101	0.137939	-0.0418428	-0.0888662	-0.244446	0.0543858	-0.109464	-0.265633	-0.230351	-0.18163	0.142497	-0.173935	0.21214	0.148232	-0.153469	-0.0795087	-0.121642	-0.108851	0.0826981	0.0808768	-0.0278383	-0.217811	-0.142621	-0.230802	-0.0393062	-0.590109	-0.0305007	-0.219344	-0.0939802	-0.078069	-0.125373	0.00382195	-0.0453418	-0.302595	-0.00709084	-0.192651	0.116726	-0.155231	0.106027	-0.236525	-0.192105	0.0662526	0.0359401	-0.0725367	0.313866	0.0695926
0.229444	-0.0155414	0.178621	-0.477783	-0.13749	-0.0998191	-0.108412	0.0824347	0.118535	-0.0452324	0.0752586	0.222036	0.320052	0.243453	0.240085	-0.0371468	-0.381996	-0.319293	-0.15539	0.0630792	-0.100969	-0.0751156	-0.169085	-0.164305	-0.182267	0.0102849	0.105403	-0.180627	-0.0381632	-0.559351	-0.30387	0.0979737	0.0480241	0.0564832	-0.130729	-0.327561	-0.0313713	0.0735685	0.0102739	0.206422	0.0692057	-0.0681037	-0.186094	0.127497	0.150121	0.0608378	-0.325137	0.312919	-0.0630083	-0.221477
0.18918	-0.19762	-0.17124	-0.508535	0.255044	-0.332059	-0.0818336	-0.0716466	0.00499605	0.115531	0.113047	-0.409212	0.3308	-0.235851	-0.165453	0.221699	0.147631	0.0887929	-0.356538	0.0132831	-0.145867	0.0209588	-0.127993	0.167111	0.233505	-0.00956434	0.140953	-0.120259	0.230469	-0.501177	0.125327	0.123614	-0.0984705	-0.115354	0.0541786	-0.124753	-0.0945814	0.0459739	-0.137897	0.155767	0.153811	-0.0843229	-0.409556	0.0582344	0.106047	0.0160232	0.190029	-0.0473434	0.0831316	0.109837
0.368595	-0.176889	-0.0625805	-0.5029	0.0716393	-0.346574	-0.0556717	0.154485	-0.103257	-0.108465	0.00396819	-0.141972	-0.0787098	-0.193347	0.0466468	-0.186861	-0.143139	0.0568894	-0.154212	-0.38418	0.0436882	-0.042693	-0.0145544	0.011338	0.0825936	-0.0490772	0.142604	0.227336	-0.354573	-0.475361	-0.253131	0.3039	0.0454144	-0.119584	0.239691	0.126793	0.131015	0.196654	0.202211	-0.180214	0.128352	0.0252488	-0.15137	0.0873874	0.0476402	-0.127042	0.130665	-0.0726028	0.388842	0.0811155
0.195188	-0.161816	-0.101849	-0.471734	-0.145515	-0.085185	-0.0421635	-0.0524723	-0.226914	-0.262535	-0.0649553	-0.108569	0.460775	-0.0548382	0.0934713	0.0926508	0.124506	-0.0233579	-0.0048178	-0.0236593	-0.0555876	-0.0402681	0.196064	0.218304	0.00415598	0.0110091	-0.150048	-0.227157	-0.0703726	-0.480726	-0.0992305	-0.0170403	-0.115517	0.320637	-0.119031	-0.282304	-0.0228363	0.314164	-0.0754058	-0.0872079	0.137846	0.24524	0.0868613	-0.0469999	0.0433289	-0.00391047	-0.315067	-0.0762667	0.317051	0.0901462
0.241527	0.0912818	0.36969	-0.240284	-0.0519343	0.191189	-0.0856884	0.0849177	-0.239104	0.122364	0.0987444	-0.1959	-0.0432136	-0.14332	0.318546	-0.212023	-0.0846158	0.0786133	0.163643	-0.255285	-0.133242	-0.0915326	0.154825	0.0223288	0.000158965	-0.0324414	-0.0376119	0.201958	-0.100701	-0.529427	-0.00793296	0.176553	0.0529509	-0.090168	-0.155952	-0.295531	-0.013619	-0.073437	-0.126305	-0.0214489	-0.394953	-0.159543	-0.102552	-0.270531	0.0815253	0.0164252	-0.0139931	0.0448678	0.428859	0.0728416
0.192366	0.0836946	0.246574	-0.370092	-0.157956	-0.129348	-0.0780867	-0.0405254	-0.237397	0.187112	-0.0676981	0.0849548	0.0862958	0.184085	-0.187669	-0.209127	-0.370187	0.14786	0.14592	-0.298862	0.0106383	-0.0879023	0.270553	-0.253445	-0.0251992	-0.0256171	0.110506	0.253588	-0.104479	-0.357401	0.184401	0.13079	-0.103477	-0.0558967	0.258292	-0.393695	0.0619766	0.368319	-0.189432	-0.0429341	0.150066	-0.0911183	0.153606	0.0606093	0.0371049	-0.159005	-0.160765	-0.0797177	-0.117196	0.0939208
0.372646	0.0774838	-0.0675405	1.77479	-0.153282	-0.0962272	-0.126203	-0.149267	0.175672	0.0590098	-0.166176	0.232051	0.0755565	-0.221028	-0.167315	-0.203468	0.176174	0.189102	0.249026	-0.39578	0.01506	-0.083154	-0.353656	0.276148	-0.171652	-0.0207922	0.0047991	-0.071046	-0.0639404	-0.50046	0.121456	-0.188674	-0.187199	-0.134385	-0.189435	0.217172	-0.0257798	0.269344	0.0664329	-0.118281	-0.434857	-0.080961	0.120578	-0.093976	0.00518249	0.0598919	0.176592	0.317175	-0.201596	0.0928141
-0.38428	-0.246479	-0.173625	-0.472274	0.296534	-0.333307	0.147697	0.12112	-0.00754279	-0.175411	-0.130545	0.077124	0.0865774	0.262064	-0.163573	-0.190078	-0.0993172	-0.493911	-0.0674974	0.475166	-0.0338265	-0.0988374	0.318717	-0.0399195	-0.132256	0.238053	0.0308924	0.211711	0.00226633	-0.529169	0.107615	-0.156488	-0.10065	-0.0597348	-0.0773698	-0.107092	0.0639418	-0.281311	0.218736	0.154443	0.102167	0.0598061	-0.106224	0.121723	0.0276612	-0.147981	0.171542	-0.104139	-0.170158	0.0918142
0.361644	0.21542	0.231004	0.551579	0.088675	-0.0277559	0.0447262	-0.0559037	0.173508	-0.217397	-0.199101	-0.174394	-0.255557	0.23877	0.209858	-0.207673	-0.184135	0.0313631	0.226429	-0.0466104	-0.0939033	-0.0662264	-0.282464	-0.24369	0.292402	-0.0370472	-0.0238627	-0.177532	-0.0548198	0.259679	0.0016959	-0.142991	-0.109757	-0.119777	0.0370076	0.282365	-0.0716109	0.338342	-0.140793	-0.0129874	-0.44094	-0.0525436	0.137005	0.104083	-0.0832684	-0.141431	-0.00631044	-0.079067	0.146422	0.110353
0.324055	0.0683	-0.0414547	-0.562407	-0.119367	0.0810802	-0.100709	0.152298	0.15277	-0.106537	0.00263808	-0.326464	0.0539097	0.34102	0.271733	0.0256016	0.169721	-0.371854	-0.300008	0.307723	-0.0637085	-0.0673862	-0.0973949	0.00958497	0.0632406	0.278157	0.135452	-0.2103	0.0938282	-0.483127	0.0690821	-0.192435	-0.114202	-0.0884526	-0.128507	-0.0902843	0.0708466	-0.0770329	-0.152375	-0.0496094	0.0336289	-0.135807	-0.317958	0.105063	0.12678	-0.17022	-0.0863433	0.0624389	-0.0540903	0.0724617
0.189675	0.175368	0.217436	0.243531	0.316724	-0.0911145	-0.0857763	0.105505	0.117613	0.00438559	-0.142882	-0.195719	0.352712	-0.2424	-0.218285	-0.0636026	0.167373	0.234917	-0.0925461	0.0710702	-0.126309	0.0310284	0.17277	-0.0353022	-0.16763	-0.0295807	-0.150425	-0.225611	-0.0522814	-0.270598	-0.0289113	0.180337	0.0509977	-0.063045	-0.138963	-0.0391368	-0.0444225	0.0646609	-0.195329	0.00511641	-0.0165893	-0.156344	-0.395735	0.0443393	0.0895355	-0.0881165	-0.167301	-0.0675334	0.208463	-0.3071
0.164579	0.0560738	0.210489	-0.346698	-0.113675	-0.398653	-0.0513892	-0.0985696	-0.0653199	0.213911	0.084913	0.258369	0.0679016	-0.0872568	-0.164706	0.296161	-0.281868	-0.133911	-0.171028	-0.350994	0.00607422	0.249014	-0.36544	0.186406	-0.142554	-0.0650115	0.108163	0.314565	0.439994	-0.614726	0.134003	-0.207716	0.0965094	-0.169599	-0.178547	0.0407261	-0.0386741	0.109691	0.230135	0.224128	-0.15928	0.0232651	-0.397741	-0.0982976	0.0521601	0.039291	-0.0391115	-0.0617637	-0.0628945	0.0921248
0.396586	0.163518	-0.109272	-0.505438	0.34458	0.441882	-0.113238	-0.116543	0.14658	-0.0732587	-0.140061	0.159362	0.0538872	0.292896	0.00519087	-0.275271	0.146789	0.210525	0.21253	-0.31371	0.0564175	-0.085459	-0.0312025	-0.0185837	-0.124112	-0.045397	-0.107343	0.235243	0.337827	0.323879	0.228481	-0.150631	0.122972	0.210286	-0.132658	-0.208789	-0.00581352	-0.0602693	-0.155984	-0.00623943	-0.249304	0.100599	0.0547377	-0.0328276	0.0395177	-0.183247	-0.047851	-0.0714798	-0.10246	0.123695
0.146956	-0.211757	-0.157644	-0.479406	-0.118644	-0.297212	0.22316	-0.117246	-0.262582	-0.287887	0.117988	0.0657832	-0.315663	-0.205342	0.01337	0.306287	-0.263437	-0.330007	-0.0389828	0.0256586	-0.116583	-0.058031	0.134045	-0.033906	-0.166046	0.00501321	0.0994306	0.207268	-0.124677	-0.707781	0.112985	-0.232623	-0.0913304	-0.166646	0.297596	-0.0255594	0.0676689	-0.0397303	-0.176104	0.202021	0.0887604	-0.144738	-0.0554872	0.0862312	-0.138492	-0.0078503	-0.0368801	-0.0994035	-0.241717	0.099945
0.330635	-0.0468666	0.00814117	-0.457235	0.00313342	-0.0984693	-0.0682265	-0.0299211	-0.223261	-0.0942755	-0.197621	-0.136669	-0.0907797	-0.201938	0.0914033	-0.14178	0.157838	-0.28277	0.248696	-0.0719877	0.16196	-0.0674019	-0.223017	-0.196581	-0.123784	-0.206249	-0.114769	-0.215413	-0.113068	-0.0528098	0.115024	-0.00311159	-0.11956	-0.0718565	0.0416096	0.13221	-0.0707473	-0.265598	0.23309	-0.0176997	0.0905773	0.281596	-0.0296128	-0.0484382	0.00971843	0.0274805	0.193417	-0.0808723	0.265427	0.0692752
-0.0403466	-0.0840202	-0.114017	-0.453304	-0.146603	-0.348574	-0.0903575	0.0952503	-0.133962	-0.156407	0.0998776	-0.137658	-0.0191585	-0.173347	-0.202435	0.0962603	0.266952	0.108367	-0.345451	0.606693	0.233525	-0.068462	0.359914	-0.0117791	0.0904734	0.0209052	-0.129248	-0.16401	-0.337672	-0.138391	-0.00791565	-0.187492	0.0438036	-0.0808683	0.207804	0.101993	-0.0657265	0.401753	-0.153217	0.0190331	0.109449	-0.226243	-0.138919	0.102756	0.0236579	-0.185492	-0.119945	-0.0849393	-0.0763394	-0.272274
-0.0602497	0.0521995	0.0278984	-0.392071	0.043349	-0.294563	0.0327646	-0.0235106	-0.0985191	0.141648	0.085191	0.196967	0.383693	-0.184143	-0.226761	-0.224929	0.28044	0.036841	-0.310729	0.223605	-0.084705	-0.0573823	-0.101015	0.262335	-0.147674	-0.0397548	0.101636	-0.301173	-0.0340544	-0.137031	0.0154013	0.184397	-0.151345	-0.130984	-0.189614	-0.0585	0.00147134	0.29903	0.221865	0.188563	0.114819	0.0485368	-0.42494	0.081486	0.0245276	-0.110737	0.136725	-0.0730236	-0.216632	0.101827
0.211115	-0.180895	-0.0532581	0.249951	-0.142846	-0.122381	-0.0725948	0.0806659	0.184015	-0.325486	0.0869565	-0.115048	0.0753144	0.286825	-0.263341	-0.249451	-0.386409	-0.101348	-0.344386	0.101009	0.316798	0.0176689	0.0601532	0.150424	0.0800034	0.0914562	-0.141625	-0.241269	-0.039668	-0.488903	0.14092	-0.136044	0.0351015	-0.167372	-0.104128	-0.0656184	-0.0248007	-0.05792	-0.162896	0.237853	0.087547	-0.151053	0.136308	0.142217	-0.199597	0.0898137	-0.125826	-0.0624252	0.224252	-0.182235
0.133263	-0.138502	-0.0722592	-0.327779	-0.100986	-0.257692	0.046946	0.096429	0.13176	0.162329	-0.0342545	0.29002	-0.276288	-0.191482	0.029853	-0.144866	-0.2736	-0.0253716	-0.0890737	-0.356971	0.229751	0.279368	-0.279307	0.274498	-0.142739	-0.0508706	-0.0723019	-0.309792	0.231385	-0.626164	-0.0713738	0.213982	-0.0662959	-0.0664526	-0.123215	-0.0800332	-0.0225088	-0.247947	0.142207	0.22216	-0.0061672	0.0658233	0.11422	0.0595471	0.0302405	0.215367	-0.101335	0.0502945	-0.168844	0.0959586
-0.534762	0.049605	0.217511	0.273568	0.194881	-0.108418	-0.106177	0.06677	0.0695693	-0.0161823	0.0873583	-0.170133	0.261518	-0.200003	-0.202196	0.0974473	-0.319641	0.0615573	-0.410627	0.0430586	0.196048	-0.0681056	0.290197	0.232735	-0.173304	-0.00197543	0.0358914	0.270498	-0.367647	-0.348733	-0.0135826	0.139833	0.050744	0.183918	-0.146249	0.186524	-0.0145407	0.229023	-0.190993	-0.195887	0.101457	-0.145802	-0.380884	0.0768293	0.0825602	0.0873308	0.147538	-0.0654357	0.183031	-0.215511
0.0292995	0.167549	-0.0323344	0.219522	-0.0620448	0.366692	-0.0773256	-0.0849957	-0.0505625	0.140639	-0.18114	-0.282461	-0.175622	-0.232399	-0.144895	0.0992083	0.0654141	0.184901	-0.341856	-0.280547	-0.125306	-0.0913927	0.166416	0.15071	0.0227699	-0.0284905	0.156093	-0.151914	0.289616	0.180581	0.219752	0.0803033	0.0106545	0.298258	0.192231	-0.0841708	-0.0612647	-0.359938	-0.0558248	0.154895	0.113996	-0.0988118	-0.17448	-0.235232	0.0409754	-0.1893	-0.337332	-0.0672241	-0.0773704	0.108411
0.161101	0.0654613	0.279668	-0.557129	-0.119561	0.124314	-0.0619722	0.0675088	0.187198	0.147232	0.145022	0.100769	-0.15711	-0.106439	0.0320403	-0.154002	0.221626	0.18227	0.0761558	-0.320725	-0.0876416	-0.111433	0.0446074	-0.251518	-0.14176	-0.19402	0.0255698	-0.0326707	-0.156448	-0.616581	0.185749	-0.180105	-0.158577	0.202149	-0.0872262	-0.248552	-0.0225902	-0.306095	-0.110557	-0.175417	0.12434	0.319025	0.112993	-0.18707	0.00774656	-0.168344	-0.0322373	-0.0812282	-0.236233	0.115912
0.125126	0.228705	-0.0251915	1.61276	-0.140085	0.275023	0.0376659	0.123064	0.217495	-0.258091	0.125746	-0.407172	0.284112	0.210324	0.162388	0.154116	-0.0437185	0.130567	0.105478	0.536054	-0.0652279	-0.0469626	0.348981	0.175042	-0.057906	0.188648	0.0998442	-0.113669	-0.00390169	1.71444	0.131113	0.110531	0.110232	0.145491	0.122234	0.252637	-0.100642	-0.275988	-0.05583	-0.0128147	0.0343616	-0.281695	-0.109244	0.145884	-0.249338	0.254058	0.159986	0.26852	0.26849	0.145778
0.334247	0.127342	-0.168696	-0.498459	-0.150772	0.338161	-0.083507	-0.104554	0.12444	0.147096	-0.0934305	0.313142	-0.266867	-0.138261	0.160946	-0.311684	0.203881	0.134978	0.274747	0.100921	-0.0266949	-0.099454	-0.181626	0.354117	-0.101972	-0.0617772	-0.112334	0.205029	0.174961	0.974947	-0.234854	0.178258	-0.132663	-0.0905884	-0.192611	-0.258666	-0.0616363	-0.224431	-0.0542429	-0.0179455	0.0732366	-0.105775	0.157903	-0.0620455	0.0547452	-0.095291	-0.258471	-0.0657199	-0.0942705	0.0240158
-0.412239	-0.179833	-0.174776	-0.51055	-0.112054	-0.0955858	-0.0781443	-0.0894686	-0.194271	-0.167449	0.0822184	-0.154677	0.369665	-0.158873	0.0911594	-0.196392	-0.0207857	0.0985874	0.0992068	-0.137958	0.0252718	-0.0748476	0.0876475	0.199828	0.297585	-0.070949	0.137366	0.168455	-0.339831	0.964082	-0.313214	0.018368	0.0605733	0.123801	0.18256	-0.0719559	0.0409374	-0.0306221	-0.0543529	-0.099436	0.105868	0.265365	0.0655272	0.0974225	0.0564216	-0.144747	-0.313853	-0.0854778	0.235667	0.127597
-0.0570688	-0.00729513	-0.0539847	-0.410116	-0.116417	-0.256396	0.218247	-0.15707	-0.234906	-0.0241326	-0.203106	-0.229445	-0.0233109	-0.187333	0.210633	-0.209208	0.244795	-0.289039	-0.0520491	-0.246377	-0.112697	-0.109786	-0.180193	-0.218806	0.0706603	-0.0179667	-0.0864956	0.210116	-0.302492	-0.343952	0.17052	0.18522	-0.064183	-0.0414597	0.203245	-0.11376	0.0721019	0.0604708	-0.108246	-0.164306	-0.0777192	-0.120303	0.00699848	-0.141464	0.0804689	-0.0186525	-0.0401629	-0.0719575	-0.113047	0.0910622
0.220075	-0.28546	-0.172387	-0.464674	0.24807	-0.0786843	-0.113833	-0.0864044	0.0937291	0.15491	0.0876715	-0.0989448	0.00078048	-0.0760261	0.23351	0.0812759	0.181529	-0.441845	-0.162239	-0.0385757	-0.112033	0.225638	-0.261673	-0.25241	-0.01181	-0.217276	0.130817	0.206066	-0.0637524	-0.362878	0.152304	-0.105992	0.0316816	-0.0716062	0.0914317	-0.216534	0.0112942	0.235323	-0.0589447	0.236813	0.0844027	-0.0976804	0.117369	0.108101	0.0455669	-0.121905	-0.0773916	-0.0752124	-0.232299	-0.202016
0.129894	-0.00171882	-0.00989924	1.64008	-0.0615104	0.0994227	-0.0710847	-0.0463626	0.133343	0.032957	0.0124093	0.331215	0.299641	0.173252	0.043648	0.315462	0.139905	-0.0267131	0.240263	0.282679	0.0419639	0.000924465	0.376491	0.13784	0.0245481	-0.00105489	-0.134602	0.261907	-0.24681	0.53502	0.12639	-0.132526	0.206978	-0.11015	0.0349185	0.126714	0.0858972	0.300679	0.198367	0.216361	-0.150436	-0.279788	0.171705	0.142325	-0.287053	0.0737113	-0.433402	0.239269	0.350607	0.140079
-0.398168	0.0929244	-0.0595322	-0.423218	-0.13559	0.0731722	-0.103533	0.0452389	-0.185621	-0.260915	0.119814	-0.28446	0.386598	0.02224	0.01711	0.211557	-0.255906	0.145925	-0.116762	0.606197	-0.0700123	-0.0836603	-0.289344	-0.201879	0.318009	-0.0303643	0.0277864	0.289638	0.335167	0.400019	0.156791	-0.118113	0.0512047	-0.0116764	-0.114558	-0.353506	-0.0245711	0.0018491	-0.124815	-0.139055	0.0650452	-0.211973	-0.253566	-0.103132	0.0604817	0.0807056	-0.141628	0.0278564	-0.176857	0.121909
0.202742	0.0574074	0.316156	-0.463836	-0.103131	0.0235443	-0.111443	-0.116832	0.165322	0.161517	-0.0713708	0.0980089	-0.0419963	-0.170461	0.0180367	-0.260248	0.155449	0.112598	-0.043918	-0.366873	-0.078156	-0.09036	-0.363051	0.203285	-0.140707	-0.0286364	-0.0470076	0.232907	0.274729	-0.511778	0.111054	0.185665	-0.221715	-0.143619	0.264305	-0.0568067	0.014327	-0.00937042	-0.146662	-0.0355956	-0.506425	0.339832	0.146882	0.0728939	0.0542981	0.0727915	0.00270523	-0.0692824	-0.200191	0.11763
0.136835	0.061747	-0.0607327	-0.480228	0.050592	-0.0748634	-0.0716533	-0.124148	-0.185214	-0.205123	-0.0935455	-0.112731	0.258365	-0.242755	-0.153652	0.0262957	-0.283705	0.100439	-0.127211	-0.388543	-0.0991421	-0.0689179	0.317131	-0.0323409	0.230762	-0.0377487	-0.130661	-0.287272	-0.338621	0.525783	0.0112986	-0.17965	0.160056	-0.162127	-0.160912	0.177551	0.090973	0.256367	0.261333	-0.186809	0.110632	-0.139128	-0.272392	-0.0525578	-0.22672	-0.0978674	-0.20721	-0.0880005	-0.265024	-0.218084
0.138632	-0.300817	-0.14383	-0.349422	0.302479	-0.373543	-0.0935922	-0.0703368	-0.0903212	-0.0979629	0.10156	0.0166784	0.0706382	-0.204027	-0.211116	-0.20971	-0.377661	-0.073339	-0.12238	-0.171777	0.01103	0.00245225	0.0988426	-0.221784	0.107352	-0.0165958	0.177873	-0.107022	0.219015	-0.500079	0.132994	0.14339	-0.0800323	-0.156744	0.0495834	-0.0546482	-0.0754881	-0.193721	-0.152582	0.206765	0.108637	0.0616691	-0.186142	0.101548	0.0671962	0.00406536	0.0247551	-0.0809899	0.395438	0.0772459
-0.182741	0.0391076	-0.148895	-0.252768	-0.13557	0.219697	0.132526	0.0936914	-0.16507	0.142297	0.150012	-0.0806395	-0.101074	0.282238	-0.16607	-0.104219	-0.315386	-0.360265	-0.054679	0.522095	-0.0996276	-0.0961127	0.102834	-0.138661	-0.0942225	-0.0234665	0.083501	-0.113591	0.0241209	-0.435727	0.111939	-0.101928	-0.0887845	-0.0422767	0.163884	0.0770367	-0.0635451	-0.281373	0.210244	-0.153435	0.119589	-0.0791215	0.101424	-0.125882	0.019217	0.0199943	0.216936	0.0701537	-0.0967111	0.0907854
0.348013	0.0637145	0.305349	-0.476268	-0.0829687	-0.321786	0.046292	0.117944	0.081311	0.043107	-0.102342	-0.104354	-0.183985	-0.246614	-0.211444	-0.252456	-0.142559	-0.348149	-0.105407	-0.327548	-0.0158666	0.263863	0.0842147	-0.206812	-0.156875	-0.242206	-0.0858969	0.284929	0.123073	0.322411	-0.0494464	0.131574	-0.0888367	-0.130586	-0.112983	0.0854355	-0.0630412	0.116357	-0.0203567	-0.0159006	0.0275668	-0.0909687	-0.346208	0.103202	-0.175809	-0.132951	-0.0646027	-0.0747341	0.331142	-0.20455
-0.483394	0.104646	-0.138783	0.565149	0.319643	-0.366619	0.150929	-0.0613213	0.0714912	-0.14917	0.00764948	-0.481741	0.245042	-0.201634	0.118947	0.116684	-0.216668	-0.0794175	-0.141478	0.394693	0.408418	-0.0629538	-0.16079	0.0885376	-0.154636	0.301387	0.117892	-0.184242	0.220354	-0.152141	0.054124	-0.17729	-0.0268098	-0.131219	0.245842	0.194282	-0.0973744	-0.0794909	-0.182783	-0.12547	0.110556	-0.151973	-0.186539	-0.102799	-0.301212	-0.0651999	-0.0388709	-0.0648773	0.0300751	0.139155
0.155175	0.0207611	-0.0824543	-0.44543	-0.171419	-0.0588114	0.070414	-0.0909211	-0.183742	-0.00625203	0.141427	-0.195467	0.412601	-0.228002	-0.186008	0.192417	0.297467	-0.334931	-0.0879041	-0.323044	0.0912862	-0.0931892	0.105334	-0.0422161	-0.171911	-0.0992764	0.141297	-0.320976	-0.0593231	-0.171119	-0.0451189	-0.211297	0.153952	-0.0573222	-0.161551	0.180153	-0.0695787	-0.252303	-0.160862	-0.0613011	0.0569057	-0.118624	-0.216694	0.0324492	0.018409	-0.0976143	-0.0551758	-0.072757	-0.228572	0.121583
0.241485	0.228834	-0.0683203	-0.49834	-0.17444	-0.0722213	-0.104339	-0.111654	-0.116447	0.121456	-0.106316	-0.204147	0.347736	0.213989	0.0169789	0.116416	-0.144047	0.131797	0.20553	0.126353	-0.0829007	-0.0473557	0.111708	-0.193159	0.358552	-0.0365636	0.143977	-0.307974	-0.113738	0.966454	0.153148	-0.141446	0.160975	-0.133841	-0.0724692	0.0977091	0.0865121	-0.0822568	-0.151989	-0.225575	-0.476274	-0.211796	0.0948665	-0.0763525	-0.310901	-0.18767	-0.0773592	0.353972	0.313953	0.0956038
0.153991	-0.240337	0.214007	-0.353044	-0.142544	-0.142512	-0.104991	-0.0636714	-0.188183	-0.303712	0.139361	-0.294151	-0.0532306	0.286784	-0.248442	0.0346561	-0.419046	0.109047	0.233951	-0.0585774	-0.0680524	-0.0403086	0.131432	-0.187441	-0.053674	0.0655365	0.101024	-0.116874	-0.0461934	-0.477622	-0.0546266	-0.163205	0.150696	-0.130715	-0.104794	0.0572244	-0.0536542	-0.266691	-0.18642	0.191704	-0.0864529	0.140018	-0.217351	-0.0320281	0.0760366	-0.179017	0.187844	-0.0774714	0.40101	0.0805523
-0.253869	0.209189	-0.0547479	0.753804	-0.120345	-0.0918496	-0.112641	-0.118773	0.253829	-0.00600569	0.116599	0.388176	-0.0637143	-0.207427	-0.194457	0.310045	0.174476	0.124412	-0.0803374	0.0637033	-0.0546758	0.318433	0.34685	-0.285091	0.0293847	-0.026941	-0.132208	-0.110667	-0.0436447	0.42669	0.17258	-0.189863	0.0282959	0.335493	-0.0921368	0.261082	-0.0707052	-0.29293	-0.0961622	-0.0505074	0.00164715	-0.180635	-0.00220161	-0.113527	0.00627365	-0.0229709	-0.031522	0.0525944	0.0350201	0.149313
0.20666	-0.209059	-0.114417	-0.39096	-0.163221	-0.0919268	0.22924	-0.0879216	-0.40911	-0.165603	-0.110273	-0.208778	0.0141903	0.256898	0.235364	0.238923	-0.239409	0.150379	0.156399	0.0535854	0.0118842	-0.111138	0.120484	-0.265182	-0.0243109	-0.0147955	-0.188351	0.217521	-0.123268	-0.529219	-0.00286976	-0.248665	0.186966	-0.0364611	0.205006	0.194941	-0.00905188	-0.422074	-0.158977	-0.029629	0.12676	0.0588163	0.0982374	0.1388	0.0142676	0.0282825	-0.148466	-0.0776648	0.410513	0.0962552
-0.108493	0.241027	0.231618	-0.472741	0.268267	-0.0569291	0.151317	0.102066	-0.307607	0.137757	0.0736446	-0.250409	-0.0663788	0.227166	0.0653315	0.32296	0.188121	0.190061	0.200709	-0.0696774	-0.0428654	0.201472	0.417182	-0.0195251	0.0361375	-0.0188134	-0.0864867	0.161066	-0.347821	-0.577338	-0.0276793	0.0661231	0.0160392	-0.0386154	-0.011945	0.12057	-0.0716707	8.31355e-05	-0.185794	-0.183005	0.0988216	-0.322779	-0.0264779	-0.148818	0.0725183	0.06964	0.325504	-0.0714206	-0.0959248	-0.288166
0.280504	-0.197913	0.245408	1.6724	0.29482	0.145801	-0.0603096	0.123108	0.206766	0.101615	-0.13461	0.309079	-0.315099	-0.208008	-0.0187628	0.262966	0.00623342	0.225202	0.197796	0.0271744	0.0414588	-0.0454128	0.328326	0.230427	0.242835	0.236371	0.107881	-0.0787077	0.195882	1.88472	0.11682	0.0851573	0.0798035	-0.028817	-0.133492	-0.236239	0.0422226	-0.0938584	-0.108112	-0.122889	0.0908715	0.305275	0.327584	0.107966	0.0677463	0.212151	0.183623	0.287619	0.24446	0.0907034
0.296844	0.188322	0.388983	-0.494937	-0.119842	-0.0928461	0.166744	-0.084988	-0.17257	0.162054	-0.107213	-0.0702299	-0.301416	-0.246168	0.0179362	-0.181004	0.223679	0.0790831	0.141491	-0.293135	0.0650981	-0.062329	0.230602	-0.178132	-0.118602	-0.0665637	0.0950551	0.17388	0.234349	-0.525584	0.160031	0.287571	-0.150545	0.361374	-0.118505	0.0528215	-0.0801255	0.0595261	0.227853	-0.143324	0.091644	-0.140455	0.105963	-0.0348874	0.0194555	0.0785653	-0.297676	-0.0661894	-0.193373	0.110224
-0.194431	0.240974	-0.0666609	-0.425465	0.0191829	0.379093	0.123667	-0.0757215	0.160712	0.183728	-0.102031	-0.132828	-0.0979422	-0.0723659	0.199975	-0.102825	-0.0410601	0.0804289	0.181187	-0.313352	0.342403	0.364535	-0.035018	-0.256444	-0.139287	-0.0293451	0.0672673	0.190277	-0.0546026	-0.585278	-0.284225	0.114103	-0.14517	0.0629213	-0.145146	-0.244315	0.016952	-0.272564	0.25185	-0.0222651	0.113381	-0.217826	0.0650655	-0.101579	-1.56533e-06	-0.152897	0.06471	-0.0875637	-0.192083	-0.206772
0.291439	0.225814	-0.070928	0.762533	0.0137236	-0.225416	0.149008	0.0972877	-0.204558	0.118622	0.111842	-0.259437	-0.133541	-0.174804	-0.213446	-0.132452	-0.117781	0.147257	-0.0511852	-0.316332	-0.0650093	-0.0813979	-0.0861333	0.0171395	-0.125411	-0.0458119	0.141804	-0.299257	-0.0657516	-0.602425	-0.0791256	0.115055	0.0314213	-0.0435262	0.278968	-0.0928881	0.103474	0.328936	-0.179763	-0.165784	0.134694	-0.104118	-0.138912	-0.0892309	-0.172059	-0.115987	-0.290071	-0.0889279	-0.233345	0.0956931
0.244074	0.207071	-0.0120946	1.61201	0.335971	0.17831	0.139788	-0.107093	0.155715	-0.0500249	-0.273571	0.237797	0.0782831	0.226192	0.201809	-0.245234	0.0164857	0.184294	0.187963	-0.326726	0.014452	-0.0413324	0.1421	0.208112	0.248861	-0.0379674	0.117527	0.240341	0.268123	2.01112	0.202787	-0.173253	0.138294	0.169569	0.213494	0.204094	0.112249	0.133102	0.199604	-0.0309251	0.152875	0.0818784	-0.153535	0.0684964	-0.247171	-0.0393036	-0.0100863	0.0423154	-0.10896	0.141028
-0.355755	0.054518	-0.172905	-0.499202	-0.164016	0.381991	-0.111824	0.100734	-0.074332	0.198464	-0.15806	0.323191	-0.0344214	0.338276	0.102855	-0.196906	0.15851	0.0598335	0.129274	0.286635	0.0393337	-0.12863	-0.319778	0.0315046	-0.0687399	-0.0674082	-0.104383	-0.17773	-0.0724254	-0.36349	-0.281081	-0.154972	0.0449175	-0.132817	0.083845	-0.0904893	0.058638	-0.0334505	-0.103423	-0.0297554	0.0135838	0.0453823	-0.0804192	-0.123297	0.0141999	0.0991554	-0.185367	-0.0753037	-0.101263	0.0785124
-0.499639	0.153448	0.280206	0.291683	-0.147375	0.0638575	-0.0752467	0.12796	-0.0352682	-0.19152	0.121123	-0.240219	0.0693071	0.14545	0.077819	0.276091	-0.251424	0.110628	0.152969	-0.0320581	-0.0793393	-0.0974534	0.333811	0.205847	-0.143283	-0.00348394	0.0901687	-0.369908	-0.0415328	0.385068	0.12019	-0.120715	-0.0676425	-0.0408111	0.278982	-0.470593	0.0445516	0.327256	-0.206711	-0.0128672	0.131954	-0.200908	0.128785	-0.304378	-0.029963	-0.144907	-0.0044152	0.0571965	-0.155267	0.0923976
-0.0151443	0.0443698	-0.0512972	0.00119274	0.105971	-0.118521	-0.0919943	0.123917	-0.264205	-0.308779	0.0990214	0.174248	-0.0942985	0.144597	0.19021	-0.209864	0.300143	0.144039	0.266013	0.0786976	0.0491079	-0.0861229	-0.37168	0.130701	-0.177209	-0.0333553	0.0718629	-0.106998	-0.0822122	-0.400228	0.106189	-0.14546	-0.109035	-0.151825	-0.160658	-0.356034	0.0355236	0.328619	-0.163255	-0.180366	0.155422	0.0505592	0.107685	-0.00449254	0.0166638	-0.0887937	0.137145	-0.0820647	-0.156254	-0.245458
0.282404	0.2613	-0.0629748	-0.454795	0.0436249	0.449457	-0.0444046	0.120777	0.133111	0.140763	-0.0832887	-0.251554	0.0641719	-0.181088	-0.19117	-0.105239	-0.058481	0.131907	-0.107778	-0.00200131	-0.114013	-0.0130209	-0.0273862	0.11103	-0.185872	0.0178142	0.171885	-0.370885	-0.114992	-0.220962	-0.111731	0.0309044	0.0502868	-0.103036	-0.229303	-0.262728	0.0432353	-0.00667691	-0.201681	-0.0406153	0.126381	-0.121195	0.111108	-0.0861076	0.0556248	-0.148395	-0.0189905	0.0466436	-0.141144	0.0468863
-0.364668	0.0575331	-0.103785	0.00790771	-0.111653	-0.297574	-0.0905626	0.127097	0.266266	0.228488	-0.157714	-0.178649	-0.0879882	-0.0738405	-0.178272	0.113229	-0.275738	0.0200299	-0.144528	-0.361637	0.0310563	-0.0777354	0.319297	-0.247452	-0.00689033	-0.0545041	-0.108681	0.223395	-0.248317	-0.581145	-0.122679	0.0381087	0.0436278	0.349609	0.0268878	0.170452	-0.113125	-0.301276	-0.0167985	-0.180281	0.0694529	-0.13346	0.0397791	-0.129102	0.0155884	-0.143234	-0.0840523	-0.0911779	-0.0760017	-0.260978
0.160424	0.190429	0.178118	1.53773	0.216293	0.265435	0.106814	0.0571328	0.232446	0.161259	0.0982954	0.27989	0.263026	-0.172216	0.129912	0.142533	0.121845	0.0808201	0.203622	0.370715	0.167984	0.0902285	0.219969	0.261977	0.0383323	0.0107831	0.117879	0.277276	0.176511	1.8268	0.122084	0.211882	0.160689	0.282472	-0.1489	0.231623	0.061586	0.00865113	0.156359	0.0163271	0.137505	0.247695	0.293389	0.0999226	0.0585222	0.14543	-0.0976601	0.259305	-0.189298	0.169828
0.356594	0.0168849	-0.0699193	-0.519664	-0.0282094	-0.108768	0.140721	-0.0542051	-0.0981971	0.075723	-0.177892	0.319117	-0.0370536	-0.164807	-0.145554	-0.131848	0.308507	0.135282	0.231883	-0.332355	0.269083	-0.07163	0.0873801	0.228495	-0.112895	-0.0207401	-0.0827483	-0.355813	-0.275274	-0.651969	0.142827	0.107713	0.222976	-0.103858	-0.117145	0.155485	-0.0449968	-0.295217	-0.173832	-0.199583	0.0425944	0.297106	0.17374	-0.0685075	-0.208345	-0.195492	0.386983	-0.0852798	0.304612	0.0929317
0.25055	0.129416	-0.154655	1.63974	0.280573	0.347042	0.0152673	-0.0915539	0.251403	0.129326	0.102691	0.292256	-0.0181551	0.270025	0.236458	0.250731	0.125182	0.202151	0.202746	0.318305	-0.0957534	0.14618	0.343107	-0.0272915	0.27821	0.0755239	0.12082	0.251958	0.222436	1.85403	0.114547	0.0850069	0.0346138	-0.0504989	0.200979	0.281948	0.0989293	0.0106143	-0.0954176	-0.0936662	0.14121	0.105135	0.114875	0.111429	0.0396546	0.0764704	0.122946	0.257191	0.346472	0.17408
-0.199203	0.231815	0.228454	-0.354309	0.0531933	-0.0860741	-0.0806088	0.123634	-0.0476226	-0.0958309	0.0198972	-0.111601	0.330536	-0.109187	-0.222693	0.131595	0.16884	-0.433879	0.196659	0.262956	-0.105983	0.206785	0.0939982	0.087246	0.0369667	-0.0492116	0.0655059	-0.131185	-0.331044	-0.577376	-0.251967	-0.195014	0.0206859	-0.128651	-0.106136	0.163707	0.0830985	0.315828	-0.169367	-0.174883	0.0832147	-0.175396	0.131959	0.0968659	-0.259943	-0.119679	0.411524	-0.0702926	0.402804	0.0248163
0.336241	0.230295	-0.0257349	-0.483352	-0.135435	-0.0745618	-0.111123	-0.111167	-0.234123	0.162915	-0.0993175	-0.184584	0.0725957	-0.188108	0.0948474	-0.196282	-0.198347	0.0821611	-0.306542	0.0726286	-0.116141	-0.0854665	-0.335481	-0.15075	-0.139836	-0.0348123	0.0915681	-0.300126	-0.00212043	0.866479	0.188057	0.265831	-0.147911	0.140341	0.283604	0.189984	0.121971	0.333487	0.18366	0.0228063	-0.407018	-0.0970211	-0.184479	-0.113324	0.0519311	0.0558545	0.0422711	-0.0737422	-0.135092	0.0700424
0.238584	0.243231	-0.0519903	-0.426032	-0.127718	-0.0758609	-0.0853913	0.00793417	0.203168	-0.0154151	-0.0459576	-0.0962904	0.0362721	0.228649	-0.172469	0.143749	0.203732	0.0784992	0.0605054	-0.030663	0.0871593	-0.0691815	-0.332858	-0.000200283	-0.158377	-0.0306263	-0.146485	0.234847	0.111443	2.15462	0.0847144	-0.18994	0.0872044	-0.131408	-0.139742	0.161446	-0.0703367	-0.0838127	-0.178496	-0.215949	-0.441443	-0.133026	-0.205315	0.0976235	0.0499374	0.217688	-0.345544	-0.0270782	0.16024	-0.287116
-0.197967	0.195641	-0.0511672	0.771884	0.333047	0.194632	0.162819	-0.140659	-0.0159968	0.083919	-0.131848	0.0156262	0.398082	-0.29909	-0.207962	-0.185558	0.180915	0.155122	0.289672	-0.352604	-0.116314	0.284778	0.0753184	-0.230434	0.0582763	-0.0345538	-0.168278	-0.091321	-0.0475724	-0.522851	-0.117908	-0.174625	0.045311	-0.120228	-0.117369	-0.358955	0.0455114	0.279536	-0.0601312	-0.0341464	0.101914	0.0788199	0.0969228	0.00171403	0.0620728	-0.137487	-0.0346281	-0.0849486	-0.105886	0.0913518
-0.115361	-0.113678	-0.173906	-0.489412	-0.0198785	-0.0774762	-0.12394	0.103409	0.196483	0.077204	-0.106394	0.234072	-0.120405	-0.275038	-0.165232	-0.218294	0.138222	-0.0476772	-0.310802	0.107622	0.273885	-0.0700755	-0.167938	-0.275882	0.0486295	-0.028617	0.0103786	-0.0203867	-0.0686217	-0.327312	-0.0837927	-0.185371	-0.0878567	-0.0316558	0.180463	0.118713	-0.0843062	-0.312893	-0.134932	-0.0278462	0.0024228	-0.113795	0.188152	0.0651155	0.0329822	0.228307	0.232366	-0.082032	0.379867	-0.210454
0.183915	-0.162857	0.350857	-0.500522	-0.12806	-0.0666491	-0.106635	0.140106	-0.0476394	0.100995	0.0302201	-0.10785	-0.0735185	-0.267646	0.159935	-0.189353	0.200551	0.176391	0.222161	-0.326082	-0.129319	-0.0798962	-0.0690543	-0.0205128	0.196016	0.324703	0.0241778	-0.310612	-0.0579806	-0.386477	-0.245384	0.195532	-0.115956	-0.135804	-0.161068	0.0949435	-0.0719755	0.0982523	-0.00237559	-0.0341475	0.112301	-0.105043	0.347499	0.0516746	0.0245034	0.0280454	0.117862	-0.0898548	0.115361	0.0698501
-0.204825	0.129848	-0.152255	-0.482795	0.000401816	-0.107638	-0.117241	-0.0632012	-0.20229	0.180293	-0.152176	-0.274791	0.00286288	0.368755	0.0855015	-0.116673	-0.200148	0.169942	-0.0547708	-0.318108	0.428169	-0.0996122	0.0919095	0.0265735	-0.130613	0.00238389	-0.0894271	0.281104	0.289184	-0.0784215	-0.0725886	-0.150275	0.00902797	-0.0944066	0.0237311	0.0972188	-0.046096	0.00869767	-0.174441	0.209158	0.166141	0.0616891	0.134374	0.0868092	0.0626529	-0.109478	0.0278293	-0.0772143	-0.225661	-0.268284
-0.0888759	-0.171069	-0.064885	-0.545578	-0.135688	0.234153	-0.081092	0.150543	-0.0400774	-0.159637	0.113372	-0.244047	0.0596479	0.238421	-0.201125	0.0485971	0.211986	-0.0214316	-0.0783077	-0.357173	-0.0544342	-0.11666	-0.324905	-0.00925182	-0.148473	-0.00463333	0.0783724	-0.322994	0.117671	-0.574988	-0.0878119	0.106587	-0.135898	-0.110831	-0.124033	0.126903	-0.102156	0.00610969	0.242742	0.225935	-0.0118687	-0.089187	-0.18978	0.116153	0.0362001	-0.139691	-0.330949	0.0493536	-0.221433	0.102594
0.125148	0.215775	0.398831	-0.563611	-0.147713	0.125715	-0.045158	-0.0325586	0.178154	0.168557	-0.141864	-0.111302	-0.325472	-0.0486913	-0.155887	-0.225302	0.196483	0.110425	-0.107064	-0.0765445	-0.114556	-0.0604803	-0.379264	0.000183423	0.0359201	-0.154227	0.0988573	-0.0425547	-0.156311	-0.481562	-0.229499	0.0788502	-0.199587	-0.0853476	0.00497052	0.175202	-0.0938377	0.13076	0.137642	0.0324657	-0.391756	0.137039	0.12949	-0.0982515	0.0598656	0.0475695	-0.0166687	-0.0775024	-0.244543	0.109725
-0.445425	-0.33629	-0.0300105	1.37497	0.222049	-0.0280826	-0.118638	-0.123215	0.229892	-0.073918	0.0311342	-0.192967	-0.030204	-0.180487	-0.20489	0.125475	-0.252996	-0.057329	0.0845162	-0.296502	-0.121906	-0.0548828	0.3277	0.26328	0.258758	-0.129775	0.127114	0.245728	-0.250166	0.208595	-0.292426	-0.0729871	0.173534	-0.118169	0.0446729	0.0498707	0.012738	0.265449	-0.137062	0.153147	0.0497981	-0.130388	-0.425823	0.0904638	-0.0782692	-0.0355734	0.115642	-0.0881777	0.0808878	0.0771846
0.276177	0.0797588	-0.027209	0.904659	-0.187193	-0.112149	-0.0874056	0.0713451	0.20974	0.142185	0.132207	0.0109447	-0.0418197	-0.0995992	-0.00942244	-0.22122	-0.12457	0.134967	-0.334487	0.192634	0.302835	-0.0854718	0.0956075	-0.246423	-0.185809	-0.0465322	0.137561	0.262315	0.316045	2.0987	-0.106584	-0.10781	0.062739	-0.0933883	-0.174366	0.2664	-0.02619	-0.231162	-0.090011	0.173638	-0.354291	-0.0981295	-0.0766731	0.141566	0.0430186	0.234627	0.133295	0.26943	-0.0885593	0.151602
-0.498805	0.0230135	-0.0661337	0.119307	-0.042918	0.0616483	-0.0719841	-0.14631	0.191147	-0.168668	-0.145657	0.2298	-0.263383	0.122245	-0.191352	-0.270889	-0.12125	-0.354767	-0.108855	0.318703	0.000887154	-0.0976066	-0.201084	-0.202089	-0.0245141	-0.0484428	0.0981698	-0.0837533	-0.27068	-0.125114	-0.320758	-0.143217	-0.10836	-0.0735572	-0.0659968	-0.443743	-0.0625967	-0.0901259	-0.145774	0.221253	-0.0343568	-0.101966	0.108531	0.114096	-0.240365	0.222782	-0.0874052	0.268145	0.188968	0.0987335
0.293801	0.00707434	0.392306	-0.523663	-0.0525306	-0.113584	0.156631	-0.111354	-0.0297286	0.157574	-0.0667224	-0.225586	-0.0852753	0.185301	0.0663589	-0.230619	-0.288419	0.102468	-0.00858492	-0.0703669	-0.118168	-0.0484698	0.0778831	-0.218659	0.00585615	-0.00251763	-0.0893532	-0.303212	0.22751	-0.555447	-0.0135041	0.350262	-0.0944492	0.147126	0.168768	0.193346	-0.0730266	-0.396678	-0.141442	0.138314	0.158381	0.101069	0.107585	0.104858	0.0715066	-0.0415742	-0.224487	-0.0840647	0.0366287	0.151592
-0.13972	0.00157016	0.329549	0.469017	-0.0798998	-0.127372	-0.11806	0.0867524	-0.0153161	0.218533	0.0920752	-0.282706	-0.0707012	-0.0809599	-0.214279	-0.00260099	-0.288526	0.112044	-0.388232	0.270993	-0.123298	-0.0105975	-0.233222	-0.0677716	-0.153052	-0.0258269	0.0316525	-0.124911	-0.0578493	-0.375299	0.0851325	-0.19513	-0.0660926	-0.0141549	-0.135353	-0.347395	-0.0295817	-0.203566	-0.168438	-0.136901	0.142971	-0.213882	-0.369694	0.108208	0.0324049	0.0988419	-0.315045	0.284757	-0.128299	0.113366
0.164683	0.0451544	-0.0628122	-0.445463	0.243333	-0.326772	-0.0794078	-0.127391	-0.33319	0.197245	-0.0190352	0.329439	-0.0849666	-0.224931	0.0351176	-0.257665	-0.271284	-0.0315797	0.0414549	-0.363097	0.00605811	0.26441	0.0012909	-0.222506	-0.00954579	-0.186819	0.15235	0.177737	-0.342264	-0.378152	0.210211	0.00604056	-0.10852	-0.156021	0.0245843	0.133192	-0.103392	-0.054087	-0.195196	0.218835	0.138717	-0.0722335	0.105241	0.111883	0.0594528	-0.0941078	-0.0810786	-0.080556	-0.232493	0.132635
-0.296516	-0.252082	-0.100447	-0.508183	0.032942	-0.109161	-0.0808695	-0.00337486	0.105715	-0.205905	-0.119331	-0.187427	-0.0743096	0.257569	-0.221826	0.0288678	-0.190899	0.141973	-0.110799	-0.236223	0.220022	0.2275	-0.19275	0.0144341	-0.177865	-0.0235138	0.0998363	0.224005	0.235062	-0.567928	-0.0846486	-0.154636	0.107297	-0.0074563	-0.168645	0.154813	0.118823	0.0283435	-0.153566	-0.213756	0.087738	0.03491	-0.0699058	0.13494	0.123155	-0.165989	-0.0128968	-0.0625519	0.21876	-0.232501
0.175267	-0.163408	-0.0916879	-0.401983	0.0166531	-0.296898	0.245145	0.0880841	0.212321	0.153311	0.129588	-0.0504879	-0.0294216	0.0765672	-0.158615	-0.232945	-0.207578	-0.175489	0.203572	-0.321625	-0.0876619	-0.0883953	-0.25677	-0.197103	-0.147579	-0.202452	-0.0755463	0.260309	-0.104483	-0.414023	-0.205185	-0.133487	-0.152044	-0.135977	-0.162033	0.0459941	-0.0198813	-0.214275	0.0109405	-0.174995	-0.416183	0.293504	0.0865644	-0.102374	-0.00896667	-0.104852	-0.232877	-0.0809171	-0.123871	0.128979
-0.101264	0.0209414	-0.0318251	-0.46109	0.351186	-0.0706833	0.206572	0.0317804	0.167849	0.186165	0.100077	0.266298	0.0664394	-0.241475	-0.158546	-0.0962964	0.354328	0.225315	0.0379631	-0.405733	0.0682021	-0.0534871	0.0993813	-0.194844	-0.014453	0.0403062	-0.0756912	-0.18709	-0.0196818	0.286613	-0.118533	0.231368	0.0720538	-0.132629	0.0216091	0.217889	0.0998379	0.30627	0.0255377	-0.0596708	0.100914	0.222422	0.104644	-0.105776	0.0123442	0.0827479	-0.052628	-0.0825673	-0.0908033	-0.296914
0.195612	0.255119	0.251532	-0.523064	-0.0962486	0.425714	0.0242172	-0.0997512	-0.231794	0.1446	-0.181075	0.210387	0.00259722	-0.261115	0.0249019	-0.18623	0.015822	0.107807	0.224092	-0.340838	0.00670114	0.322177	-0.333053	-0.302117	0.0184666	0.0530546	-0.0820363	0.148994	-0.0617998	-0.57464	-0.132061	0.114028	-0.166385	0.379603	-0.11633	0.0149202	-0.069699	-0.250162	0.211597	-0.0776008	0.11086	0.102977	0.123978	-0.0979996	0.0144515	-0.141693	0.113161	-0.0807333	-0.117711	0.0820892
0.189844	-0.405155	-0.238359	-0.246532	0.080519	0.142613	0.0757974	-0.15793	0.246663	-0.224125	-0.000667155	0.00402182	0.342337	-0.24372	0.0458535	0.0925193	-0.156183	0.030737	0.0360199	0.0837169	-0.14986	0.255377	-0.359574	0.00452759	-0.137924	0.00370486	-0.158713	0.239659	0.217436	-0.320005	-0.0250156	-0.241374	0.0520156	-0.150944	-0.224624	-0.1072	0.0508929	-0.0149811	0.270693	-0.0785309	-0.0836809	-0.0995834	-0.193521	0.143212	0.0154752	0.0531571	0.16561	0.0187645	-0.174291	0.11055
0.370662	0.248475	0.204868	-0.493603	0.065847	0.0886383	0.207583	-0.119473	-0.0156075	0.162341	0.0695952	-0.135765	-0.0990795	-0.250214	0.139354	-0.16658	-0.118293	0.174217	-0.0240121	0.101628	-0.00343207	0.229223	-0.282734	-0.166035	0.0658465	0.000285657	0.124814	-0.0931691	-0.395273	0.289079	-0.0917687	-0.202629	-0.000428509	-0.102305	0.0305612	-0.274491	0.0364071	0.088807	0.221842	-0.0407595	0.123509	-0.226826	0.0913798	-0.1612	0.0199052	0.0126404	0.180593	0.0619007	-0.269283	0.0845456
-0.130947	-0.00439743	0.000337135	-0.0749655	-0.152468	-0.0421921	0.0310325	-0.0257914	-0.257327	0.0976689	-0.0271997	-0.347913	-0.323087	-0.173161	-0.159726	0.219099	-0.00334612	-0.0342372	0.17304	0.167237	-0.133637	-0.0292512	-0.0759391	0.202051	0.201105	-0.0321739	-0.107304	-0.208063	0.156786	0.149689	0.132124	-0.161342	0.0475584	-0.0957928	-0.0675225	0.161266	-0.0519525	-0.344478	0.28231	0.174602	0.0159893	-0.132794	0.38968	0.0606447	-0.048004	0.12892	0.198365	-0.0794577	0.0852639	0.0692115
-0.468916	-0.185739	-0.0376961	-0.373396	-0.03414	-0.0652898	-0.128028	0.115736	0.230085	-0.293568	-0.1356	-0.196846	0.0832666	-0.162628	-0.219896	0.0799516	-0.201644	0.141973	0.24856	-0.0329533	-0.0296124	-0.0838188	0.144688	0.251148	-0.0440717	-0.0218665	-0.137362	0.239304	0.182741	-0.676368	0.0985942	-0.230187	-0.111445	-0.150934	0.0124398	-0.100659	0.096152	0.311577	0.214726	-0.185333	0.135053	0.107331	-0.412214	0.115954	-0.0277027	0.092289	0.0659636	-0.0637308	-0.136745	0.104948
0.150873	0.164685	0.163054	-0.223156	-0.106165	0.374201	0.143403	-0.0837352	0.200232	0.124784	0.0950011	-0.167564	-0.237982	-0.0916155	0.252272	-0.237761	-0.101889	0.091864	0.0883737	0.0508383	-0.096084	0.228808	-0.292308	-0.0121338	0.0238789	0.00251376	0.116479	-0.270134	0.194581	-0.00933244	-0.0862426	0.0891468	0.0289714	0.417399	-0.0578773	-0.0555118	0.0467753	0.228236	0.192788	0.164515	0.0675552	-0.0634187	0.405285	-0.350019	0.0560975	-0.117896	-0.294467	-0.0660055	-0.198257	-0.147756
-0.261692	0.0540076	-0.188145	-0.497744	0.156087	0.13157	0.0833508	0.0975737	0.130003	-0.0122739	0.168961	0.290045	-0.0821025	0.293768	0.0719606	0.0240534	0.0981031	0.0386462	0.0391254	0.0129176	-0.0677515	-0.0711701	-0.159924	0.121744	-0.134182	0.058816	0.106847	0.235797	0.395228	-0.350293	-0.0200178	-0.152647	-0.002216	-0.0506428	-0.187519	0.194673	-0.0395447	0.407725	-0.0409977	-0.022866	-0.566019	-0.156034	0.112126	-0.104756	-0.00296039	-0.0671011	-0.00408214	-0.0633321	0.0924174	0.163513
0.233476	0.00237526	0.238812	-0.264748	0.0594605	0.468811	0.134443	-0.0729149	0.145735	-0.0266031	0.131869	0.338097	0.0196723	0.227208	-0.211758	0.286529	0.163805	-0.398229	0.0767155	-0.328475	-0.0433079	-0.0408425	-0.352622	0.101625	-0.0985354	-0.0161985	-0.116033	-0.300277	-0.0775047	-0.589601	0.124281	-0.0770616	0.0831825	-0.142846	0.175686	-0.124196	-0.025121	0.22879	0.16365	-0.174053	0.136159	0.338064	0.173263	0.121062	0.040471	-0.014028	-0.340606	-0.0669559	0.261522	0.139451
0.22978	0.0944003	-0.0378406	1.57251	0.235	0.145934	-0.0168826	0.0925091	0.182599	-0.0752588	0.077262	-0.239585	0.283344	0.205994	0.20553	-0.0170836	0.0907136	-0.00832414	-0.184308	0.548737	-0.11361	-0.037932	-0.130113	0.0544997	0.247414	0.0429643	0.162013	0.275976	0.280984	1.97073	-0.0168805	0.105743	0.0887395	0.298445	0.028344	0.0561303	-0.13509	-0.0435614	0.138791	-0.0225348	0.0509313	-0.0824504	-0.000534255	-0.409039	0.0663253	-0.00468876	-0.407726	0.0219989	0.331114	0.137498
-0.45507	-0.198779	-0.0546908	-0.295594	-0.115702	0.150101	-0.0853977	-0.0424067	0.261308	0.0456544	0.125417	-0.383211	0.21779	0.197566	-0.194031	0.0915737	0.232271	-0.381618	-0.389277	0.415711	-0.106448	-0.0607708	-0.20442	0.105488	0.00875386	0.0892951	0.0983503	0.274915	-0.00554441	0.287109	0.0674905	-0.128475	0.146669	-0.111099	0.192196	-0.0898007	-0.0519445	-0.267554	-0.0637013	-0.0487616	0.120142	0.139377	0.168545	0.119864	-0.309983	0.0839875	-0.327225	0.0453964	0.194675	-0.338111
-0.466254	0.204711	0.293684	-0.349241	0.346139	-0.0912254	-0.0868506	0.0599326	0.00590024	0.22476	0.0782731	0.095054	-0.102232	0.259457	-0.142219	0.142782	0.256337	0.208742	-0.139074	-0.133884	-0.0273083	-0.0479724	0.230404	-0.26694	0.0263248	-0.0231021	0.0610692	0.252565	0.331032	0.312071	0.152126	0.0184291	0.0227347	0.151748	0.220467	0.037048	-0.0413289	-0.398415	0.215468	-0.00998261	0.128735	-0.34329	0.103592	-0.0858586	0.0668179	0.23943	-0.293757	-0.0596233	-0.0726556	0.148129
-0.116158	0.168572	-0.136897	-0.46338	-0.0712844	-0.100479	0.137117	-0.0702474	-0.219117	0.131633	0.132714	-0.117734	-0.303849	-0.204346	0.250231	-0.199653	0.224047	0.0486187	0.205265	-0.0610228	0.0102043	0.279645	-0.316093	-0.189518	-0.00439628	-0.179685	-0.125457	-0.194378	0.339809	-0.514766	-0.0795426	0.13919	-0.129186	0.381341	0.162113	0.164996	-0.0663585	-0.292174	-0.0842122	0.171594	0.133067	0.0831145	0.0546298	-0.301423	0.0668481	0.0503084	-0.300083	-0.0703037	0.14184	0.0888215
-0.0565248	-0.139013	-0.0464285	-0.466513	0.246357	-0.0692021	-0.123133	0.015292	-0.267884	-0.0231812	0.127684	0.26943	0.41609	-0.161357	0.189879	-0.0284094	0.255093	-0.139477	0.18715	-0.333348	-0.0245382	-0.0644342	-0.00639703	-0.040374	0.28306	-0.00827812	-0.101647	-0.122256	-0.276073	-0.477114	0.140971	0.0834316	0.0795483	0.473043	-0.151385	0.193604	-0.0140364	0.424585	0.0493321	-0.245219	0.116985	0.342535	0.221953	0.0982581	0.00864709	-0.113477	-0.0112441	-0.0780304	-0.222733	0.0734891
0.281341	0.243437	-0.0118019	0.521774	-0.106474	-0.104912	-0.0677371	-0.0398223	0.263006	0.129006	-0.170666	0.325616	-0.333172	0.202288	0.128083	0.317616	-0.0812402	0.0964493	0.208511	0.569899	0.00669459	-0.0761721	0.359387	0.249654	-0.136235	-0.0718625	-0.0816213	0.245367	0.306603	1.46626	-0.0623952	0.214013	0.0914457	0.289895	-0.0403723	0.135203	0.00535883	-0.354744	-0.139842	0.169253	-0.386976	0.282696	0.142103	-0.059445	0.055966	0.0895255	-0.348572	0.0270565	0.203787	0.129507
0.122695	-0.410544	-0.173381	-0.447874	-0.123772	0.358679	-0.0451505	-0.0650912	-0.290089	-0.1415	0.0321559	-0.278498	-0.329946	0.369483	-0.165074	-0.136654	-0.167627	0.160154	0.182152	0.228232	0.403955	0.252962	-0.197028	-0.214013	-0.0991681	-0.0327519	-0.0912656	0.123841	-0.297167	-0.469074	0.125959	-0.141393	0.049891	0.460096	-0.0838175	0.0609285	-0.073577	-0.0333822	0.250076	-0.191624	0.126128	-0.0951353	-0.116172	0.0806064	0.0865011	0.0407965	0.0298138	-0.0797076	-0.129763	0.0738397
0.123146	0.0648919	-0.0451244	-0.463076	-0.10799	-0.0816267	-0.0408446	0.123858	0.144745	0.108504	0.112654	0.320023	0.0755045	-0.263111	0.0510695	-0.189471	0.269194	-0.00260503	0.0814228	-0.437339	-0.150192	0.0144413	-0.0342244	-0.264122	0.0488161	-0.0516533	-0.116689	0.193582	-0.248721	-0.579615	-0.128927	0.0770155	-0.104494	-0.139645	-0.160596	-0.0271858	0.0196913	-0.0967131	-0.154994	0.27379	0.03705	0.0334651	0.061545	0.117943	-0.208856	0.0607019	0.133485	-0.0866454	-0.114444	-0.178954
0.288703	0.273587	-0.131448	-0.2709	0.0372047	0.388606	-0.0541164	0.0987047	-0.25219	-0.101652	-0.144009	-0.128017	0.110513	0.0879775	0.127023	0.284286	0.120596	0.140215	0.138903	0.412699	0.233356	-0.0463375	0.262647	0.206797	0.275094	-0.00633318	0.117749	0.244364	-0.028417	2.05457	0.172548	-0.117701	0.0639673	0.323606	0.151134	-0.332252	-0.0835044	0.25728	-0.133242	0.176165	-0.365941	-0.0976417	0.0368068	-0.0514075	0.052345	0.115096	0.025127	0.0396437	0.334361	0.131304
-0.450222	0.0727533	-0.196862	-0.4706	-0.134964	-0.0699716	-0.0805771	0.0754053	0.14674	-0.370131	0.0749008	0.251177	0.0619508	0.222393	-0.261917	-0.145173	-0.296093	0.0357985	-0.0988644	0.0292146	0.348319	-0.089322	0.169046	0.192954	0.0961416	0.280758	-0.105692	-0.151825	-0.0491954	-0.505142	0.0807704	-0.159814	0.0608607	-0.140442	-0.1047	-0.360379	0.034981	0.0770928	0.238147	-0.193128	0.0448872	0.178402	-0.0973099	0.0764819	0.00104386	0.0568445	0.00607735	-0.0811635	-0.105127	-0.154072
0.359223	0.0121725	-0.156766	-0.426291	-0.0534392	-0.104011	-0.106023	-0.116584	-0.287068	-0.130957	-0.167009	0.303612	-0.0505622	-0.216527	0.164977	0.107706	-0.106266	0.198492	0.227904	-0.00142249	-0.152562	-0.0641678	-0.263607	-0.0577831	-0.0728692	-0.0654751	-0.140863	-0.133851	0.240592	-0.673142	-0.064055	0.131305	-0.115104	-0.0473563	0.103505	0.105937	-0.108187	-0.313633	0.266957	-0.0272249	0.0772717	-0.0742783	0.0202588	0.129015	0.160311	0.0728703	0.160714	-0.077357	-0.150334	0.0909686
-0.246105	-0.223261	-0.072427	-0.471776	-0.0170613	0.375778	0.183303	0.0879742	-0.217533	0.175418	0.111762	-0.261157	-0.0533346	0.159331	-0.152268	-0.245626	-0.122804	0.177262	0.170736	0.399241	-0.105224	-0.0765478	0.0681883	0.110193	-0.12269	-0.0109031	-0.0767558	0.31841	0.0513862	-0.298633	-0.0773338	0.129022	0.0313859	-0.0960334	-0.142066	0.149546	-0.0569014	-0.00362174	-0.239647	0.000165631	0.088273	-0.276734	-0.181456	0.0575202	0.0396598	0.102456	0.37023	-0.0800751	-0.233648	0.15788
0.185895	0.283558	0.177982	1.5779	-0.138337	0.170442	-0.0965047	-0.101915	0.246942	0.189957	-0.0513924	-0.154475	0.0893229	0.183776	0.18451	0.132993	-0.0974385	0.143266	0.253238	0.500846	-0.0939342	0.296844	0.182163	-0.268753	0.0247606	-0.035432	0.124151	0.262406	0.288875	0.826635	0.182012	0.195251	0.18592	0.229425	0.154523	0.257362	-0.0845373	0.0132344	0.157187	0.150816	-0.461219	0.0861229	0.385111	-0.101231	0.095473	0.10685	0.00518535	-0.055277	0.0781949	0.171689
0.151792	0.265222	0.200443	-0.214472	-0.130927	0.181304	0.227565	-0.112039	-0.194133	0.150617	0.156594	-0.0969989	-0.0278971	-0.223647	0.16311	-0.22173	0.1256	0.11913	0.0723181	-0.280664	-0.108079	-0.0942502	-0.338547	0.095286	0.0135697	-0.0362402	0.0777263	0.260067	-0.0451751	-0.296588	-0.400405	0.294271	-0.131634	0.295498	0.25848	-0.27675	-0.0825754	0.0564861	0.0267011	0.125469	0.139492	0.0984777	-0.158178	0.0742675	0.0423004	0.0751573	-0.119074	-0.0751132	-0.110385	0.156458
0.166032	0.161538	-0.196411	-0.495654	-0.108179	-0.0948543	0.0163807	-0.0958064	-0.27417	0.134412	-0.147351	0.237034	-0.317135	-0.166425	-0.131959	0.114093	0.285096	0.021045	0.222402	-0.316059	0.0605787	-0.0923039	-0.0827216	-0.0575887	0.0133477	-0.114848	-0.115477	-0.171936	-0.244441	-0.697685	-0.307837	0.0106587	-0.142133	0.145151	0.0417331	0.132219	-0.0675404	-0.293916	0.00501684	-0.0141409	0.0977568	-0.110537	0.414145	0.0639359	0.00142068	0.0279217	-0.160653	-0.0846435	-0.211557	0.0834325
0.337677	0.145416	0.018025	1.58549	0.29135	0.302132	-0.0760821	0.147307	0.277018	0.0833232	0.126056	0.321619	-0.0627541	-0.190577	0.0904731	0.281352	0.153668	0.184108	0.115799	0.591847	-0.0939798	-0.0366224	-0.0312805	0.301025	0.0245747	0.0700241	0.163819	0.262233	0.203015	2.01636	0.100747	-0.163669	-0.151172	-0.0500898	0.218018	0.316918	0.0870962	0.156841	0.0292803	0.179792	-0.360138	0.0744914	0.124377	0.123304	0.081666	0.195775	0.134249	0.212214	0.352228	0.152161
0.0499172	-0.0124695	-0.179688	-0.503792	-0.173469	-0.0632024	-0.0886596	0.1494	0.0173232	0.073636	0.0798825	-0.28227	0.0580897	-0.145154	-0.19589	-0.149548	0.223446	0.128912	-0.123257	0.0405191	-0.136522	-0.0518221	0.153865	0.204479	-0.123101	0.318569	0.113698	-0.102978	-0.172076	-0.12558	-0.204759	-0.211039	0.104137	-0.144003	-0.181542	-0.021798	0.0545246	0.00397463	0.313859	-0.0694	-0.376631	0.210836	-0.0284835	0.0920312	0.010852	-0.144326	-0.0532523	-0.0723997	-0.231915	0.0924442
0.278328	0.0760704	-0.0180317	1.63052	0.303747	0.268596	-0.0714142	0.132228	0.258962	0.0919155	0.107008	0.313449	0.363886	-0.17055	0.119945	0.297908	0.13978	0.210342	0.191448	0.521785	-0.0698059	-0.0290661	0.0987939	0.310302	0.252407	0.0428617	0.145281	-0.115946	0.0364753	1.93658	0.128995	0.167863	0.174597	0.106951	-0.154222	0.341042	0.0663216	0.157444	-0.0323069	-0.159304	-0.376058	-0.0849412	0.124459	0.0779199	0.080563	0.15776	0.0123001	0.246927	0.376682	0.149597
-0.470271	0.19198	0.125137	0.0303822	0.334209	0.11603	-0.0267947	-0.12925	0.176791	-0.296198	0.0934956	0.32166	0.349545	0.223105	0.0203949	0.390915	0.186991	0.193153	0.24344	0.0635983	-0.0759926	-0.0619865	0.293561	-0.0368356	0.306825	0.0452046	0.0988718	0.189688	-0.0155452	1.9641	0.110562	-0.10816	-0.117429	-0.0696885	0.225822	-0.557106	0.0406698	0.269796	-0.110759	0.201781	-0.448464	0.255623	0.0954714	-0.0530331	0.0798881	0.0902005	0.0279586	0.0486502	0.115833	0.11455
0.224173	-0.00192448	-0.0665332	0.547214	-0.12669	-0.104666	-0.0642952	-0.09495	0.179997	0.0139145	0.0253246	-0.305241	0.325086	-0.213133	0.105643	-0.137964	0.208227	-0.352174	-0.137766	0.0306478	-0.118224	-0.0411313	-0.139184	0.249922	-0.152398	-0.0238522	-0.080674	-0.118906	-0.195322	-0.472197	-0.0760877	0.0767024	0.161711	-0.0643704	-0.1713	-0.3088	0.065157	-0.161474	-0.170093	-0.0754502	-0.129029	-0.241725	-0.320108	-0.0602732	0.103864	0.018283	0.340283	0.034281	0.430734	0.0785148
0.304493	0.237133	0.16866	0.0324892	0.292852	0.325692	-0.0640605	-0.0674025	0.191607	0.104728	0.10641	0.269323	-0.178819	-0.213396	-0.157019	0.194925	0.114257	0.231694	0.2335	-0.162861	0.0227894	0.00256791	0.16961	0.243816	-0.151657	-0.0346099	0.0306226	-0.0937747	0.170031	1.90218	0.203433	0.199908	0.0804612	0.247214	0.0279428	0.258858	0.0842013	0.363343	0.212343	0.142409	0.148487	0.277335	0.140627	-0.0342789	0.0647271	-0.0179391	0.14635	-0.0706692	0.291641	0.130867
0.165869	-0.237325	-0.203253	-0.508094	-0.0968279	0.026601	-0.0752561	0.0971112	-0.245995	0.130936	0.0996325	-0.24359	0.0762415	0.334503	0.0100312	0.0826498	0.0561072	0.0839354	-0.0652747	0.000470691	0.0220567	0.191975	0.0840193	-0.0688775	0.174587	0.286491	0.0357875	-0.1365	0.0116164	-0.52555	-0.256486	0.0305293	0.0295816	0.264043	0.222876	-0.024077	0.0374366	0.0915354	-0.148521	-0.0332999	0.0608512	-0.324932	0.0915587	0.0660106	0.101715	0.0471366	0.249874	-0.0673369	0.341661	-0.263186
0.154859	-0.118267	-0.036589	-0.435173	-0.119682	0.0555924	-0.10556	-0.0757206	-0.192127	0.13336	0.127625	-0.129785	-0.0598884	-0.254253	-0.174779	0.0132265	0.183486	0.16988	-0.0595016	-0.142538	-0.11383	-0.0734616	-0.402933	0.127014	-0.0537494	-0.0290906	0.0457844	0.0115038	0.357053	-0.410879	0.119736	-0.160284	0.0533471	-0.0221217	0.28136	0.157098	0.0967863	0.325048	0.241474	0.219955	0.0593851	-0.12859	-0.334846	-0.0887201	0.056849	0.0213402	0.366299	-0.054138	0.0745886	0.0360457
-0.432482	0.0226513	-0.132025	-0.433443	-0.0504478	-0.323613	-0.0497205	0.0724194	0.0792468	0.140855	0.0781018	0.162328	-0.214098	-0.132102	-0.18574	0.0592444	0.214093	-0.360947	-0.196087	0.0650586	-0.10156	-0.0363351	0.127896	0.205044	-0.110294	-0.16433	-0.0874415	-0.131608	-0.230748	2.15396	0.0670885	-0.190878	-0.108909	0.137851	-0.163921	-0.0444275	0.052121	-0.284022	0.266423	-0.0800341	-0.360093	-0.150687	-0.161574	-0.112289	-0.13547	0.0113702	-0.052973	-0.0828774	0.0794976	-0.168925
0.31138	0.0739402	-0.203493	-0.523772	-0.0927946	0.0872946	-0.101831	-0.0882946	0.197892	0.137615	-0.0954871	0.294511	0.0175697	-0.137434	-0.166877	-0.0621474	0.194967	0.152637	0.0765014	-0.0832182	0.303313	-0.0400899	-0.0427472	-0.279373	0.228438	-0.0476166	0.149415	-0.280953	-0.134233	-0.486844	-0.104608	0.111625	0.0756517	-0.0739155	0.0165661	-0.11907	0.0751789	0.290532	-0.144086	-0.0979184	-0.373395	-0.157424	0.134243	0.107941	0.0675681	0.0894641	-0.310044	-0.0746656	-0.161349	0.0855911
-0.500861	-0.230247	-0.0378619	0.76607	-0.0170791	-0.0942067	0.252175	-0.0857591	0.166532	-0.147705	0.106592	-0.271216	-0.0865557	0.159232	-0.276984	-0.0655149	-0.257115	-0.40521	-0.304112	0.12316	-0.149665	-0.0830122	-0.1002	-0.0232523	-0.21422	-0.0557354	0.116624	-0.144869	0.0721989	-0.336171	-0.0545357	-0.145468	-0.0999164	-0.133945	-0.193212	0.16593	0.101527	0.273217	-0.144013	0.209745	-0.396984	-0.124545	-0.366312	0.0700972	0.100622	-0.0870749	0.163837	-0.0692721	0.264708	0.0671717
0.356879	0.268973	-0.185621	0.150485	-0.178702	-0.0933721	0.165056	0.112827	-0.13723	0.109158	-0.0283976	-0.271594	-0.0566227	0.187111	0.0753309	-0.207575	-0.0657094	0.118859	-0.110308	0.165785	-0.148416	-0.0870713	0.0483465	-0.0127649	-0.0916358	-0.280973	-0.105259	-0.157794	-0.146111	-0.199406	-0.068998	-0.178697	-0.0707696	-0.0929239	-0.174114	-0.260695	-0.0188352	-0.106313	-0.164694	-0.0447146	0.118847	-0.165553	0.0991513	-0.100276	0.0239553	0.109375	-0.33854	0.0550214	0.258013	0.122505
-0.138812	0.275644	-0.162544	1.5381	0.285141	0.147103	-0.0560651	0.0872009	-0.0392728	-0.0813569	0.0247254	-0.398194	0.237293	0.220615	0.0352649	0.245175	0.124323	0.186396	-0.500392	0.473529	-0.0821014	-0.0497383	0.31772	0.233641	0.0563674	0.22071	0.127364	0.262654	0.0460841	2.00913	0.11882	0.0163306	0.108893	0.234231	0.0685587	0.272265	0.112169	0.12066	0.255044	0.0996507	0.14368	-0.28019	-0.163445	0.114783	-0.237805	0.203832	0.374271	0.261624	0.257399	0.140132
0.240746	0.0657558	0.300017	-0.518957	-0.111641	0.00141837	0.140037	0.113642	0.106877	-0.0798718	0.00425036	-0.078914	-0.0378562	0.198828	0.271902	-0.173925	-0.302719	0.0808922	0.215496	-0.0489102	0.0213585	-0.0632252	-0.0879836	-0.0165681	0.142009	0.0889531	0.138837	-0.290775	0.282387	-0.602905	-0.0281663	-0.121942	0.0605101	-0.129995	-0.0705339	0.0733927	-0.0740251	-0.32904	-0.0270439	-0.00521443	0.0533042	-0.00405782	0.125232	-0.356387	0.0682405	-0.156371	-0.0519774	-0.0663207	0.530861	-0.164046
-0.454237	-0.23145	-0.0586666	-0.381715	0.286437	-0.131203	-0.111374	-0.0066941	-0.0354728	-0.185905	0.0674556	-0.304191	0.245359	0.19149	-0.220817	-0.136518	-0.211616	-0.252566	-0.302268	0.100404	0.18739	0.274273	0.0652024	0.233103	0.303946	-0.0350963	-0.105365	-0.0877815	-0.059392	-0.334513	0.122776	-0.0162868	0.0120871	-0.0691246	0.20934	-0.405269	0.0937089	-0.0253803	-0.193662	-0.205565	0.137528	-0.120953	0.0253624	0.09598	-0.0336025	-0.145436	-0.104771	0.0542481	0.0281466	-0.321322
0.199651	0.195627	0.19983	-0.376413	-0.126925	0.366355	-0.0869789	-0.081869	-0.162206	0.171201	-0.091817	-0.112154	-0.30941	-0.226556	-0.203915	-0.0688864	0.191174	0.103072	0.27265	-0.279746	-0.0979448	0.260413	0.165145	-0.200549	-0.00655549	-0.0155378	-0.148203	-0.268151	0.302691	0.862044	-0.0826386	0.127092	0.19301	-0.0497014	-0.114265	-0.0780708	-0.066064	0.265142	0.28852	-0.027072	0.109048	-0.146109	0.211126	0.050156	0.0421296	0.0222695	-0.313338	-0.070123	-0.168329	0.0777165
0.0143311	-0.343315	-0.19397	-0.38993	-0.12498	-0.0960599	-0.113231	-0.102997	0.0695646	-0.0637438	-0.0208947	0.337904	-0.0268321	-0.248325	-0.165233	0.0550576	-0.216929	-0.436971	-0.026337	-0.0480028	-0.132458	-0.0531456	0.0553768	-0.02395	-0.190965	-0.0435362	-0.124163	0.237074	-0.108564	0.11041	0.08158	-0.258869	-0.103549	-0.17604	-0.231848	0.144719	-0.0321344	-0.261634	-0.189502	-0.0531119	0.0490271	0.0459144	0.0976211	0.0490358	0.00620825	0.0200287	0.173992	-0.0849837	-0.148382	0.0964866
-0.460791	-0.383726	-0.15764	-0.498588	-0.00738819	-0.0507717	-0.106317	-0.0297447	-0.0787905	-0.208894	0.122298	-0.360531	0.0682609	0.287635	0.0759292	0.0287934	-0.11266	0.179598	0.240924	0.169209	0.00715741	-0.106896	-0.246021	-0.271843	0.240694	-0.0119007	0.077131	0.234899	-0.259413	0.165382	0.102046	-0.145853	0.0349999	-0.0708913	-0.071599	0.0437409	-0.109162	-0.266249	0.265201	0.207141	0.0941262	-0.264877	-0.166116	0.134991	-0.0831849	-0.143977	0.381639	0.0344643	0.108421	0.0917858
0.182315	0.0836795	-0.156675	-0.54955	-0.0728724	0.103742	-0.0607626	0.0143752	0.152184	-0.287465	0.13823	-0.277455	-0.00478785	0.269659	0.110695	-0.152873	0.149424	-0.40106	-0.039264	0.513137	-0.0920681	-0.0325201	-0.226324	-0.230625	-0.127668	-0.0105159	0.103751	-0.133985	0.391266	-0.464664	-0.0462001	0.0901891	-0.078871	0.349484	-0.099837	0.106533	0.107411	0.240609	0.201784	0.203461	0.109968	-0.0947821	0.0533458	-0.137609	0.0117965	-0.110639	-0.358535	-0.0804154	-0.107146	0.123527
0.103631	0.0251877	0.21776	-0.0767363	-0.00690143	0.223899	0.163997	0.111124	-0.350081	0.131734	-0.0930291	-0.0676156	-0.16669	-0.191025	0.237469	-0.135029	0.244907	-0.0903757	-0.000262505	-0.341445	0.0409545	0.324591	-0.226352	0.0234976	0.0181966	-0.192116	-0.0868249	-0.133136	-0.0549341	-0.464478	0.123539	0.209207	-0.148524	0.415658	0.217691	0.0500567	-0.0045899	-0.0250087	0.182066	-0.137693	0.0943984	0.161944	0.0976249	0.0797949	0.0858758	0.00115229	-0.331435	-0.0789474	-0.0815588	0.0907616
-0.0921714	0.100237	-0.0317221	-0.487089	-0.105427	-0.110682	-0.0679499	-0.00436227	-0.298279	0.138665	-0.138097	-0.198736	-0.0598163	0.194652	-0.200963	-0.190676	-0.173936	0.0174504	0.180605	0.203462	-0.126692	-0.0515507	0.0797909	-0.0172852	-0.12496	0.323871	-0.0816258	-0.145199	-0.0132306	-0.574867	-0.280716	0.232325	-0.157528	0.153692	-0.0826026	0.163305	-0.0877122	0.00110085	-0.187937	-0.0237685	-0.499383	0.295205	-0.0517666	0.0898924	0.0714646	-0.106615	-0.149392	-0.0706268	0.254708	0.114942
-0.502783	0.0408433	-0.0365022	-0.264018	0.322656	0.406614	0.174509	0.0864765	0.198337	-0.00647034	0.119838	0.290907	-0.109898	0.298851	0.0847684	-0.0513112	0.236473	0.193072	0.0622787	0.0469449	0.0549641	-0.0845187	0.17557	-0.177934	0.0407696	-0.00337565	0.127902	0.2895	0.390871	-0.256075	0.150595	0.158158	0.05797	0.000965611	0.212551	0.175077	0.0900893	0.178847	0.219686	-0.193404	0.0846257	0.18434	0.0694777	0.11079	0.0707234	0.0457421	-0.0267771	-0.0724419	0.225326	0.168545
0.199589	0.0792954	-0.074001	0.320187	-0.1043	0.1348	0.12817	-0.123203	-0.2257	0.10652	-0.0323139	-0.203657	-0.0742601	-0.0861891	-0.193065	-0.131951	0.207507	-0.0271213	-0.0319968	-0.099993	-0.13487	-0.0645332	-0.0448719	0.0262337	0.00693883	-0.02931	-0.0721289	-0.366235	-0.0390102	-0.392084	-0.106155	0.113812	-0.181544	0.0983418	-0.08082	-0.288566	0.0850187	0.313603	0.203015	0.027301	-0.438819	0.289232	0.0367282	-0.271311	0.0542619	-0.147595	0.134533	0.365941	-0.242852	0.0831874
-0.101947	0.0337815	0.17267	-0.461144	-0.111609	-0.0786779	0.210999	-0.142069	0.224198	-0.138749	0.119707	-0.380563	0.0898981	0.195229	-0.205862	0.116415	0.0573938	0.101207	0.0688132	0.0419465	0.0268107	-0.0889327	0.165769	-0.216235	0.08064	0.320406	0.141568	-0.129754	-0.0943652	-0.356237	0.100449	-0.121918	0.0410536	-0.154838	-0.0227001	0.123791	-0.0982472	0.225152	-0.164159	0.165355	0.0031365	-0.134804	-0.339763	-0.0647991	0.0463384	-0.181942	0.180389	0.0557796	0.110662	-0.231761
0.202021	-0.326635	-0.146948	0.52888	0.251974	-0.0552912	-0.0629521	0.107364	0.211743	0.170909	0.052535	-0.214437	0.107131	-0.139602	0.226285	0.246555	0.205861	-0.478659	-0.111395	0.0409091	-0.0211543	0.203861	0.109657	0.303914	-0.183542	0.022028	0.153522	0.216958	0.10205	0.309546	0.104362	0.0453947	-0.0975265	-0.0877928	0.324413	-0.0574644	0.0913384	0.317882	-0.166504	-0.0257626	0.0817415	-0.26667	-0.116837	-0.107004	0.056132	0.169556	0.115182	0.0528242	-0.0190994	-0.246052
-0.0702568	-0.215745	-0.0122459	0.87475	0.0332302	-0.118015	-0.0656083	-0.0284135	0.0276188	0.125185	0.129023	0.0164373	0.065632	-0.167061	0.278136	0.0160442	-0.306898	0.0188062	-0.346362	0.185009	-0.120127	-0.053069	-0.273918	-0.241779	-0.121052	0.212115	0.111471	0.281134	0.230335	-0.121739	0.114518	0.210936	-0.126209	-0.122934	0.253607	-0.095048	-0.0366386	0.380955	0.157651	-0.0477083	0.104979	-0.224243	0.102015	0.0258309	0.00102608	-0.11225	-0.383077	-0.0563051	-0.212055	-0.23184
-0.357555	-0.380488	-0.173487	0.0704432	0.276119	-0.114235	-0.0653361	0.107999	-0.304576	0.144332	0.0766246	0.326592	-0.0432924	0.166871	-0.181433	0.320206	0.263525	-0.395035	-0.0775214	0.0455952	0.0839021	0.291014	-0.244449	-0.0328627	-0.0830895	-0.0205756	0.013721	0.200469	-0.36194	-0.0499124	-0.0335357	-0.195487	0.00688615	-0.10501	0.0357987	-0.0638313	-0.0569256	-0.0289656	0.0050797	-0.0703404	0.055766	-0.0643912	0.119309	0.112134	-0.245817	-0.128769	0.174207	-0.0835753	-0.12102	-0.291169
0.277048	-0.174524	-0.191872	-0.473902	-0.149948	0.137346	0.194223	-0.0707389	-0.125091	0.16249	0.142291	-0.284178	-0.0999351	0.333648	-0.160174	-0.0916919	0.0409868	-0.00796944	0.0841931	-0.066479	-0.0212985	-0.0871837	-0.297061	-0.176186	-0.140615	0.0266736	0.110293	-0.289357	0.422272	-0.673282	0.169132	-0.17725	-0.111656	-0.101594	0.240323	0.0600188	-0.100775	0.00600616	-0.156092	-0.0202417	0.150321	-0.261002	0.120141	0.0803005	0.00449562	0.095274	0.211468	-0.0772501	-0.317788	0.100597
-0.239588	-0.169218	0.27754	-0.49253	-0.128937	-0.320438	-0.124388	0.0940535	0.166924	-0.252223	0.026031	0.202836	-0.0234702	-0.170812	-0.164111	-0.100253	-0.129722	0.0913235	-0.350885	-0.211519	-0.107026	-0.0414332	0.0696453	-0.060483	-0.17375	-0.0597322	0.0816317	0.270159	-0.29466	-0.17799	0.114828	-0.215681	-0.106462	-0.135269	-0.148854	0.112778	-0.0893545	0.0702632	-0.178728	0.243399	-0.37026	-0.275867	-0.360296	0.110217	0.0340747	-0.115328	-0.0559258	-0.0811265	-0.129189	-0.262506
0.159296	0.000995007	0.31178	-0.282638	0.346783	0.170108	-0.0806626	-0.0597835	-0.234496	0.154922	-0.0125489	-0.122504	-0.33631	0.161806	-0.157164	-0.209447	0.234352	0.195235	-0.113921	-0.28737	0.333495	-0.0738208	-0.0129041	0.205855	0.00469819	-0.0276864	-0.10189	0.226608	-0.100567	-0.396051	0.142101	0.275405	0.0968677	0.448979	-0.133307	-0.102546	-0.00499387	-0.0454046	0.178453	-0.213765	0.128145	0.350275	0.0929963	-0.0701084	0.163406	0.0218624	-0.133571	-0.0750007	-0.06193	0.0763747
0.119989	-0.309804	-0.148005	0.0909839	-0.11398	-0.327648	-0.0783266	-0.086416	0.181573	0.18362	-0.0970432	0.204049	-0.041841	-0.199534	-0.140033	-0.0321593	-0.05071	0.016967	-0.25314	-0.401775	0.0265646	-0.0631674	-0.284361	0.277052	-0.112048	-0.0321123	-0.111844	-0.320066	-0.318713	1.54271	0.149317	0.0156498	0.0276214	-0.157708	-0.209821	-0.0500794	-0.013501	0.0946578	0.0707746	-0.0438883	0.107525	-0.155255	-0.372818	0.0940909	-0.19863	-0.0293476	-0.105541	0.0126843	-0.114063	0.0847485
-0.463559	-0.174823	-0.0824438	-0.0898863	0.322477	-0.117208	0.228469	-0.0055042	-0.0823323	-0.329392	0.108884	0.258939	-0.0267742	0.20919	-0.237351	0.117253	-0.382026	-0.461656	-0.120032	0.0735708	-0.00321948	-0.0725105	0.0599014	-0.0545794	0.255364	0.0853656	0.12917	-0.327483	-0.202285	-0.695548	0.0870295	-0.192721	0.177501	-0.0193089	0.253094	0.143192	-0.0871447	-0.0138027	-0.138254	-0.118736	0.134735	-0.108206	0.140513	0.0743619	0.0352356	0.01335	-0.177113	-0.0877023	0.0627051	0.0959912
0.110336	0.052313	-0.0537094	0.529217	-0.170053	0.355213	-0.0380098	0.104214	0.248103	-0.135143	0.0821959	-0.190886	-0.0144162	0.170156	0.119643	0.108869	0.196053	0.150091	-0.0280925	0.307932	-0.0904655	-0.0745744	-0.0285958	0.0885361	-0.0177114	0.148786	0.0892875	-0.107768	0.262072	0.807043	-0.0258678	0.223595	-0.179242	0.359402	-0.101996	0.233944	-0.0497667	-0.026693	0.159323	-0.00278316	-0.493346	0.305462	0.102585	-0.126075	0.0604574	0.0859072	-0.0161986	0.258101	-0.238223	0.149148
0.16871	0.0529228	0.347428	-0.492521	-0.0999788	-0.111971	-0.114073	-0.124695	0.0128273	0.083651	-0.0798625	0.266042	-0.0654343	-0.249792	0.054344	-0.148022	-0.334278	-0.312805	-0.0912981	-0.398629	0.00889075	0.340085	-0.30275	-0.214648	-0.137569	0.309139	0.0921005	-0.140181	0.236109	-0.517843	-0.0819229	-0.0270568	-0.120037	-0.110061	-0.117133	0.0483355	-0.0416889	-0.200372	-0.129693	-0.00236925	0.137444	0.130293	-0.189039	0.0839891	0.0386761	-0.141057	-0.274268	-0.0815051	-0.198136	0.099656
0.179766	0.0579903	-0.0641007	-0.457862	0.32546	-0.0866619	-0.0758652	-0.0959478	0.182652	-0.00592147	0.018778	0.0932234	-0.0492951	-0.230688	0.0207651	0.088827	0.324265	0.157908	0.00944925	-0.418567	-0.151949	-0.0491724	0.112032	-0.037346	-0.146207	-0.0210402	-0.0761506	-0.345745	-0.0923869	-0.626985	0.13537	0.138949	0.0997096	-0.150749	-0.141105	0.0545229	-0.0681052	0.0420918	-0.0456431	-0.0108787	0.0810891	0.393306	-0.186488	0.0651318	-0.216842	0.0732723	-0.0851523	-0.092905	-0.281826	-0.201061
0.210143	-0.276273	-0.0588244	-0.548298	0.0166728	0.11146	0.225214	0.0788975	0.0382045	-0.305301	0.154547	0.00102996	-0.0890584	-0.214388	0.214908	0.0732615	0.0552692	0.150898	0.186842	-0.30881	-0.0281618	-0.086922	-0.291355	-0.25412	-0.166258	-0.0858588	-0.119228	0.179888	0.0569072	-0.600157	0.14183	-0.165226	-0.108326	0.213869	-0.119899	0.167311	-0.0349555	0.122723	-0.131324	0.223129	0.0710122	-0.127626	0.178555	0.0782632	0.0310816	0.0528572	-0.319073	-0.0818789	-0.0621159	0.108617
-0.348008	0.0869159	-0.210676	-0.234281	-0.131364	0.532555	0.0435045	-0.0865747	0.180431	-0.0180826	0.173383	0.321508	0.0559285	0.295415	0.167856	-0.250674	-0.222856	-0.0160244	-0.0475619	0.0316634	-0.107581	-0.0935223	-0.123507	-0.16205	0.0527964	-0.0361091	-0.113411	0.184187	-0.0527263	-0.652966	0.14239	-0.210175	0.0753064	-0.137634	-0.128887	0.151294	-0.0466434	-0.285525	-0.135073	-0.22336	0.149507	0.288125	-0.0313485	-0.0810725	0.0825151	-0.140186	0.165092	-0.0901246	-0.252069	0.132751
0.204292	-0.184373	-0.0753578	-0.433745	-0.142577	0.408053	-0.0608792	-0.0893378	-0.338494	0.128651	-0.0513427	0.299738	-0.18393	-0.112949	0.178709	-0.240161	0.175565	0.14906	0.0543983	-0.0139976	-0.00344389	-0.0894755	-0.199032	-0.30908	-0.00200064	-0.229572	-0.13581	0.172922	0.41664	0.0268888	-0.0467371	-0.155298	-0.159544	-0.0580672	0.216729	-0.243992	-0.00792869	0.00578664	0.00139613	-0.0649109	0.100007	0.314792	0.137962	0.0622744	0.0642394	-0.0669992	-0.282788	0.0312002	0.0555576	0.0865186
-0.0444764	0.108194	0.19785	-0.448843	-0.107132	-0.109283	0.1707	-0.048964	-0.0251988	0.0359317	-0.170701	-0.176835	0.000859225	-0.180935	-0.00210428	-0.191606	-0.0115079	0.16824	0.232147	0.592445	0.0158294	-0.091788	-0.33455	-0.205755	-0.0329787	0.0415888	0.0907296	-0.17469	-0.162668	-0.582344	-0.108643	0.10294	0.0853776	0.29585	0.166844	0.0522849	0.0123873	0.0106788	0.197974	-0.189949	0.11084	0.205361	0.104617	0.105212	0.0191185	0.0716227	0.102341	-0.0999971	-0.142877	-0.185793
-0.417897	-0.00158914	-0.163804	1.6843	0.229067	-0.328507	-0.0952974	0.113358	-0.150149	-0.14921	0.0725245	-0.0458631	-0.0119169	-0.0218783	-0.00811773	0.00369251	-0.156607	-0.0858389	-0.173704	0.372504	-0.11391	-4.87138e-05	0.0635559	-0.242704	0.0279049	-0.00426405	0.120095	-0.305737	-0.0809252	1.80877	0.0453181	0.137092	-0.13018	0.148186	0.0635198	-0.256104	0.000398531	0.264346	-0.0185723	-0.138982	0.11627	-0.152879	0.144424	-0.122366	0.0261388	-0.125806	-0.0299804	0.285002	-0.172757	-0.178699
0.187086	-0.293025	-0.0421679	0.56375	0.222361	-0.331994	-0.105998	-0.0944377	0.0110949	0.0963985	0.120046	0.375386	-0.242488	0.164886	0.046414	0.263182	0.13917	-0.134674	-0.0809636	0.0902295	-0.0291827	-0.0561909	-0.13803	0.30158	-0.0949772	-0.0805973	-0.0882174	-0.218647	-0.306519	0.381938	0.0969173	-0.0219425	-0.106056	-0.113841	0.21001	0.231279	0.11434	0.0303298	-0.0821409	-0.149628	0.0882229	0.209007	-0.024594	0.0942091	-0.221984	0.0374044	0.3337	0.277222	0.267471	-0.227817
0.134272	-0.0215086	-0.0950167	-0.419273	-0.144569	-0.251794	-0.0143647	-0.0955694	-0.0742529	0.143155	0.0893161	-0.272246	-0.17974	0.323252	-0.170331	-0.0130016	0.281107	-0.402681	-0.256806	-0.141568	-0.110564	-0.087371	-0.292173	-0.126079	-0.123134	-0.215038	-0.0755713	-0.245819	-0.212545	-0.49699	-0.244789	-0.115327	0.081799	-0.119019	-0.0851443	0.0454093	-0.0482127	0.0276785	-0.00310509	0.155304	0.0752987	0.282313	-0.171613	0.0325289	-0.191413	0.00133715	0.130612	-0.096926	-0.237381	0.0621829
0.156783	0.0791289	-0.0604432	-0.566344	-0.15653	0.139087	0.162951	-0.0911248	-0.273469	0.168983	-0.0827391	-0.214917	-0.281726	-0.124264	0.154084	-0.195308	-0.0944646	0.129994	0.242932	-0.339804	0.0120808	-0.0905323	-0.014455	-0.262129	-0.136898	-0.100592	0.113587	0.269601	0.234268	0.0982736	-0.122672	0.0894851	0.0795063	-0.0507469	-0.108376	0.178777	-0.00711208	0.147548	0.241384	0.003101	0.108251	-0.0895933	0.110905	-0.256057	-0.000672313	0.0326326	-0.18223	-0.0773394	-0.10302	0.0993614
-0.140793	0.164347	-0.0397141	1.57397	0.34393	0.298696	0.0139823	-0.0292852	0.174283	0.214994	-0.120869	0.263903	0.0953377	0.197873	0.155129	-0.256196	0.136871	0.165821	0.197856	0.576607	-0.0934927	-0.0416461	0.196396	0.143616	-0.138312	0.0115736	0.0629498	0.245212	0.249228	1.21412	0.137482	0.0845932	0.0978332	0.311081	0.197863	0.139069	0.114824	0.269007	0.204734	-0.0135059	-0.48102	0.228819	0.138253	-0.0832923	0.0444322	0.169054	-0.249921	0.229646	-0.0239878	0.164611
0.18276	0.0815781	0.00840364	1.6527	0.0464334	0.167025	-0.0582633	0.106177	0.243791	0.113319	0.0977077	0.111066	0.309516	0.252872	0.256441	0.312132	-0.111578	0.164067	0.211607	0.22814	-0.0849133	0.146446	0.128701	0.157934	0.0394449	0.17732	-0.203983	0.224672	0.0282016	2.02747	0.136712	-0.121145	0.153378	-0.102596	0.0546113	0.209548	0.0682949	0.26409	0.20219	-0.0243451	0.104197	-0.0862015	0.281712	0.122869	0.0535479	0.155401	0.03122	0.207943	0.296862	0.127594
0.135341	-0.18412	0.159943	-0.376582	0.0181524	-0.088096	-0.110549	0.115002	0.190786	-0.241819	0.0670984	-0.320779	-0.201292	0.163708	-0.228397	0.264511	-0.143506	-0.293731	-0.324982	-0.0958645	0.00106284	0.233993	-0.0484515	-0.210492	0.355177	-0.0259834	-0.108736	-0.229665	-0.071842	1.724	-0.0498798	-0.132115	0.0169002	-0.0675273	-0.116903	-0.0297478	-0.0396531	-0.0368491	-0.155084	0.14717	0.0842795	-0.133377	-0.350814	0.102563	-0.179189	-0.147506	-0.36356	0.0586484	0.109107	-0.148033
-0.283039	-0.25749	-0.0836837	0.476559	-0.105404	-0.0972815	-0.107643	0.0895421	-0.265549	0.127037	0.0823422	-0.266145	0.271602	-0.130119	-0.211463	0.213068	-0.159664	-0.0208208	-0.108036	-0.0872837	0.117915	0.310233	0.407119	-0.0620112	-0.123368	0.0725964	0.105724	0.174311	-0.340337	-0.574069	-0.264308	-0.228711	0.124871	-0.0967921	-0.162467	0.139133	0.112292	-0.283445	-0.00325493	0.00217489	0.0905909	-0.074973	-0.151666	0.0975824	-0.290569	0.224433	-0.149184	0.0469386	0.00517188	-0.281276
0.25328	-0.0040798	-0.169343	-0.220957	0.00268308	-0.126049	-0.0858117	-0.125157	-0.104084	0.104381	-0.126153	-0.165364	-0.285395	-0.224344	0.232982	-0.184108	0.272114	0.171441	-0.0199683	-0.288045	-0.126065	-0.0608824	0.123098	-0.0111088	0.0177531	0.263313	0.151386	-0.163485	-0.371526	-0.344992	0.142421	0.0589768	-0.146041	-0.15504	-0.00741889	-0.212133	-0.0681646	0.302094	0.260093	-0.0136041	0.0706773	-0.127511	-0.205815	-0.0939893	0.0300378	-0.0812533	-0.0504452	-0.0752127	0.535542	-0.144776
0.18035	0.21391	-0.0890756	0.928489	0.0649416	-0.13748	-0.0745734	-0.112557	0.0258152	0.151518	0.0190299	0.0623954	-0.0276986	-0.236751	-0.0477842	-0.0537293	-0.137451	0.102238	0.0276641	-0.418482	-0.154163	-0.0764718	-0.035546	0.257976	-0.0404889	-0.0521392	-0.137698	-0.227421	-0.0819259	-0.431662	0.13111	0.364501	0.0333793	-0.128172	-0.189756	0.103859	0.0829064	0.00158226	-0.149912	-0.0667355	-0.0762387	-0.173341	0.0673354	-0.344545	0.0670872	-0.167672	0.0105572	-0.0877781	-0.161133	-0.167368
0.178069	0.195571	0.231178	-0.510753	-0.137276	-0.102575	0.107703	-0.102615	-0.201874	0.119535	-0.170836	0.0460818	-0.284573	-0.20356	0.107787	-0.178685	0.087584	0.15225	0.00284688	-0.279074	-0.051186	-0.0560144	0.102742	0.131659	-0.0377143	-0.0761	0.0343346	-0.10366	-0.13488	-0.634927	-0.344549	0.274315	-0.16697	0.384714	0.0324688	0.117002	-0.0838369	-0.347287	0.0333345	-0.0352615	0.100432	0.26189	0.0990913	-0.319727	0.0269725	0.0393601	-0.10927	-0.0834538	-0.138136	-0.211781
-0.129888	-0.265513	-0.0827267	-0.399234	-0.115639	-0.349712	-0.092685	-0.115255	-0.037578	0.127316	-0.141063	-0.272847	0.271845	-0.251032	-0.0264014	0.181893	0.0697735	-0.370006	-0.299744	-0.317815	-0.0997107	-0.0821809	0.162677	-0.0421092	0.0628268	-0.0783342	0.106444	-0.285877	-0.327156	-0.447264	-0.00687065	0.141563	-0.0891384	-0.100239	-0.147312	0.0809602	-0.00556382	-0.242193	-0.188734	-0.137778	0.0897637	-0.126452	0.0297717	0.114864	0.117506	-0.205873	0.164893	-0.0797571	-0.132648	-0.177617
0.230349	0.0376269	-0.155529	-0.410563	-0.156936	-0.0867886	0.180404	-0.0501159	-0.242588	-0.0748372	-0.0165264	0.379893	-0.279844	0.220441	-0.158246	0.0808819	0.226274	0.162132	0.226836	-0.186154	0.0132196	-0.0468329	-0.284595	-0.164422	0.200036	-0.124839	0.0115551	-0.0978693	-0.270431	0.323251	-0.0666128	-0.0944857	-0.183469	0.13434	-0.127376	-0.320492	0.0530669	0.353435	-0.0984068	-0.166236	0.124739	0.254695	0.420491	-0.247499	-0.0476244	-0.0961162	-0.260006	-0.084472	0.210965	0.0618631
-0.174991	0.0606668	-0.0238036	-0.448488	-0.118172	-0.0646894	-0.0607314	0.114275	-0.139463	-0.19902	0.111703	-0.282539	-0.293512	0.295536	0.263695	-0.231942	0.273532	0.0657913	0.0122906	-0.0156237	0.0833501	-0.0721009	0.124093	-0.248784	-0.0190488	-0.0075044	-0.0470094	0.131865	-0.0386333	-0.35527	0.0873272	-0.164089	-0.100322	-0.137839	0.126267	-0.236513	-0.0141033	-0.12393	0.3253	0.148635	0.151153	-0.109109	-0.246142	-0.0787876	-0.2435	-0.0118885	-0.178937	-0.0808397	0.200865	0.079243
0.122427	0.31808	-0.0316923	-0.438417	-0.0989305	0.0503035	-0.0798147	-0.107355	0.139424	-0.18237	-0.0517361	-0.323027	0.151438	0.302441	-0.163985	0.114369	0.255458	-0.408514	-0.129013	0.581631	0.0609479	-0.0845743	0.184873	-0.212513	0.0634144	-0.0934887	-0.118388	0.247844	0.28752	-0.51184	0.152212	-0.182253	0.0320667	0.347315	-0.0821596	0.10525	-0.123585	-0.262275	-0.139177	-0.180111	0.0661024	-0.143331	-0.0956149	0.109902	0.0974465	0.0937427	-0.356678	-0.058503	-0.253144	0.0324094
0.28954	-0.202523	-0.218522	-0.371624	0.0978211	-0.0818114	0.236254	-0.120659	-0.180539	-0.140518	-0.154279	-0.334932	-0.297621	0.288723	0.0425901	0.197582	0.308484	0.0876347	-0.0612771	-0.150341	0.100484	-0.0879793	0.139136	-0.273184	-0.101248	-0.0484115	0.079443	0.224034	-0.369977	-0.301529	-0.132175	0.119588	0.0360018	0.357572	-0.0955138	-0.0427047	-0.0329204	-0.291528	-0.126089	0.206058	0.0507343	-0.264294	0.00410406	0.0967316	0.00608645	-0.138316	-0.0452618	-0.0751886	-0.254008	0.112818
0.224338	-0.215579	-0.0849583	-0.16739	0.0442493	-0.13245	-0.113521	-0.0959558	0.253607	-0.120208	-0.00163446	0.257543	0.0294828	0.211648	0.0643846	0.272864	-0.348514	-0.00330528	0.0884088	-0.264513	0.399489	-0.0670979	0.114125	-0.00725486	-0.160654	-0.108977	0.114864	0.187792	-0.146984	-0.411836	-0.139951	-0.122116	0.148658	0.263172	0.0541601	0.0961063	-0.070316	-0.307155	-0.20492	0.243945	0.0778321	-0.123619	0.179114	-0.131352	-0.206159	0.113847	-0.394688	-0.0694572	0.3528	0.114108
0.259647	-0.000505366	-0.0864358	-0.534881	-0.0473122	0.0582867	0.15177	0.0918605	0.013426	0.0947975	0.119759	0.30226	0.0563928	-0.176807	-0.151103	-0.151143	-0.17529	0.140221	0.252648	-0.344834	-0.137206	-0.0525994	-0.142123	-0.245651	-0.113752	-0.0371916	-0.0960816	-0.340507	0.28156	-0.648938	-0.133404	0.261223	-0.150832	0.140089	-0.116775	-0.190523	-0.0213685	-0.272085	0.202972	-0.203235	0.115509	0.26609	0.0376658	-0.0655731	0.0317106	-0.154971	0.0829788	-0.0775011	-0.212798	0.116475
0.142751	0.206961	0.189516	-0.368938	-0.12218	0.399157	-0.0120413	-0.0943264	-0.192422	-0.194657	-0.109236	-0.24754	-0.0326099	-0.0720014	-0.147139	-0.13745	0.16526	0.101946	0.00303321	-0.0869522	-0.0260171	0.333546	-0.350025	-0.263722	0.0630972	-0.116813	0.0809246	-0.101526	0.117342	-0.503428	-0.0930302	0.266983	-0.140043	0.444267	-0.0736202	0.0387985	-0.0524499	0.0148512	0.15716	0.186663	0.0778654	-0.0970122	0.47754	-0.114333	0.0373665	0.0182594	-0.157522	-0.0787166	-0.189671	0.0918449
0.213804	0.121272	-0.220886	0.280886	0.33392	-0.127204	-0.0335683	-0.103393	-0.0560336	0.00531235	0.0190003	0.279593	0.338373	-0.173735	-0.139002	-0.211288	-0.342855	0.196156	0.0459116	0.0171769	0.385571	0.17246	0.0714532	0.26014	-0.116598	-0.0329051	0.0818985	-0.0948809	-0.0755774	-0.647541	-0.296882	-0.0268045	0.0746362	-0.118639	-0.0849813	0.0919156	-0.075154	0.0212956	-0.0274736	-0.0664808	-0.0330284	0.304036	0.112336	0.0769871	0.101725	0.0911767	0.0803538	-0.0837095	-0.162553	0.125405
-0.0221512	0.0212934	-0.0180467	-0.238142	-0.111894	0.200479	-0.0902755	0.00557962	-0.270467	0.082702	-0.174776	0.262559	-0.354969	-0.178828	0.0211073	-0.20093	0.210314	0.0543382	0.221683	0.219511	0.292734	-0.11184	-0.345563	0.0410476	0.28053	-0.0464904	0.164677	-0.0824786	-0.0271623	-0.57	-0.0544445	-0.14364	0.205118	-0.0115088	0.147426	0.18496	0.015422	0.185695	0.144599	0.240012	0.14536	-0.0644284	0.38359	-0.155693	0.0310708	0.027823	0.170218	-0.105232	-0.0954453	0.0549112
-0.165324	-0.223459	-0.202372	-0.482557	-0.0360616	0.384512	-0.0854738	0.103757	-0.118284	-0.240123	0.115686	-0.307691	-0.037833	-0.00708138	-0.259268	0.0698905	-0.0834301	-0.0801564	0.199976	0.580183	-0.0266373	-0.00674117	0.0517086	-0.27567	0.038626	-0.205392	-0.126286	-0.309867	-0.215044	-0.540872	0.111356	-0.184358	-0.110894	-0.0730656	0.018856	-0.130404	-0.0584702	0.36996	-0.14145	-0.193598	0.0791255	-0.135412	0.143793	0.122902	0.163326	-0.151972	-0.162475	-0.0721956	0.404056	0.0862089
-0.2696	0.0402761	-0.0412884	-0.538945	0.0503907	0.119057	0.124396	-0.101627	-0.0980833	0.193241	0.12306	0.144268	0.0103208	-0.123703	0.153318	-0.163166	0.169496	-0.50911	-0.0255103	0.403059	-0.123046	0.307782	-0.238767	-0.0487697	-0.165144	-0.0486859	0.101999	-0.281746	0.209361	-0.457657	0.114712	0.289985	0.0317107	0.399249	-0.0588574	0.197567	-0.0837737	-0.270351	-0.104323	0.184327	0.122227	-0.175321	-0.201142	-0.12722	0.0561885	0.0118644	0.0179706	-0.0711936	0.19288	0.0938974
-0.293478	-0.217502	-0.171044	-0.506782	-0.102884	0.129452	-0.126308	-0.0924387	-0.204234	0.0893933	-0.143885	-0.244757	0.033554	-0.197806	0.0843342	-0.166114	-0.284758	-0.0143065	0.0707044	-0.314418	0.269854	-0.0958831	-0.181132	0.0043312	-0.114488	-0.197609	-0.12015	-0.100756	0.158173	-0.48805	-0.112366	0.0528661	0.0515274	0.175537	0.0112015	-0.277776	0.00475018	0.32467	-0.186902	-0.0301309	0.142835	-0.162644	-0.214551	0.084513	0.0729982	-0.100471	0.10278	-0.0822988	-0.23105	0.0814699
0.071415	0.102786	0.182776	1.5834	0.305659	-0.0360827	0.0335595	0.111708	0.219614	0.114225	0.0938723	0.122189	0.314997	0.275424	-0.229677	0.308088	-0.222129	0.215608	-0.034794	0.505967	0.0124924	-0.0503935	0.341156	0.213172	0.293231	0.178629	0.136972	0.27729	0.203897	1.96786	0.121635	-0.0994304	0.126083	-0.0579542	-0.123345	0.205415	0.0843028	0.268832	0.17528	0.115646	0.116578	0.124681	-0.39825	0.111498	0.0532353	0.178823	0.222577	0.236164	0.24448	0.128761
0.205215	0.310894	-0.0811378	-0.520553	-0.1476	-0.0873804	0.197132	-0.103594	-0.283341	-0.230771	0.12313	-0.0524422	-0.0603818	0.284263	0.190425	0.110455	-0.124922	-0.0318209	0.0623103	-0.108243	0.00649926	0.305519	0.144551	0.0362024	0.233117	-0.0506705	0.101875	0.31633	0.0612582	0.179888	-0.012422	-0.198798	-0.110154	-0.12551	-0.0790985	0.129866	-0.0596863	-0.373689	0.130485	-0.0704891	0.157157	-0.0548244	-0.158218	-0.0795271	-0.058952	-0.0324957	-0.192614	-0.0840244	0.113785	0.121402
-0.398847	0.0727547	-0.0695991	-0.360237	0.227329	-0.41217	-0.0692588	0.128125	-0.245767	0.127447	-0.108026	-0.0100362	0.0656752	0.257948	0.0671603	0.0878213	-0.198786	-0.127163	-0.0464494	0.568238	-0.0673919	-0.0130896	0.203058	0.0331466	0.00726759	-0.0540425	0.0916382	0.394918	0.203289	-0.328795	-0.245281	-0.146983	0.0379258	-0.0392698	0.165567	-0.386286	-0.0325645	-0.0479297	-0.127058	-0.0584242	0.0745025	0.126395	0.16213	-0.140218	-0.0499796	-0.0746024	-0.0611767	-0.0676184	0.243239	0.134537
-0.258578	0.00329793	-0.0619025	-0.00181138	0.0887886	-0.0785229	-0.0717348	-0.117894	0.201466	-0.272514	0.0949526	0.170501	0.0627794	-0.142118	0.13381	-0.02785	0.23357	0.0217579	-0.127003	0.0590539	-0.1109	-0.0529636	-0.183277	0.148034	-0.0395633	-0.0385323	-0.143889	-0.175573	-0.221806	-0.551089	0.106124	0.0377925	0.199993	-0.0630752	-0.164478	-0.426809	0.0667736	0.32626	-0.134952	-0.15651	0.128453	0.106885	-0.317056	0.066041	0.0266181	0.0630587	0.186025	0.0440928	0.373593	-0.155373
0.0644679	0.0401833	0.379318	-0.559646	-0.138605	0.131078	0.13239	-0.111455	-0.251579	0.15136	0.165702	-0.00433377	-0.308644	-0.130068	0.246477	0.0399537	0.161142	0.156919	0.0326314	-0.2105	-0.104888	-0.0854788	-0.370338	-0.215553	-0.00758202	-0.0108677	-0.107819	0.235071	0.274192	-0.59673	-0.0910425	0.0763573	-0.191939	-0.0686095	0.128242	0.148736	-0.032847	-0.354223	0.135039	-0.138757	0.0841279	0.273227	0.0837023	-0.103429	0.0187068	0.0122569	0.123929	-0.0783777	0.189672	0.0909248
0.248605	0.184156	0.275692	-0.485218	-0.112683	-0.0955508	-0.0305918	-0.0977576	-0.139942	0.107783	-0.166957	0.233395	-0.344081	-0.253689	0.271748	-0.272419	0.218385	0.145184	0.189644	-0.322777	0.0492509	-0.0862101	-0.344469	-0.249832	0.0193334	-0.021112	-0.141861	0.13259	0.174491	-0.57564	-0.109653	0.114961	-0.187602	0.393362	-0.136515	0.0560293	0.081287	-0.307695	0.171587	0.139376	0.127545	0.127006	0.360731	-0.101123	0.00307725	0.037307	-0.153849	-0.0765983	0.257728	0.0709602
0.388119	0.202576	0.2565	-0.23045	-0.122752	0.483548	0.138176	-0.105184	-0.198811	-0.0784388	-0.0270783	-0.221749	-0.247556	-0.0815839	0.0460209	-0.32532	-0.00803389	0.125468	0.0864764	-0.17316	-0.10345	0.02377	0.108565	-0.224375	-0.142191	0.0344492	0.126484	0.16691	0.26061	-0.505534	-0.0718603	0.0357072	0.0609637	-0.101079	0.227373	-0.0662567	-0.0638621	0.26157	0.0703002	-0.0198289	0.0884129	-0.0833669	0.155701	-0.097696	0.040895	0.0834543	-0.0161459	-0.0653538	0.34077	-0.192304
0.138137	0.312013	-0.165339	0.0813967	0.223596	-0.332467	-0.0316442	-0.149308	-0.0750448	0.13121	-0.0830001	0.261167	0.0439235	-0.163312	0.0224915	0.14298	-0.17253	-0.072682	-0.0508716	0.0108793	0.0072047	0.279996	-0.200966	0.169863	-0.0481189	-0.164729	-0.092767	-0.102011	-0.339049	-0.378294	-0.330711	0.216535	-0.111773	-0.0597186	0.0711272	0.0977756	0.119636	0.0272645	0.149787	-0.0568182	0.148969	0.266423	-0.0470493	-0.0530373	-0.242117	0.104356	-0.12161	-0.0793502	-0.213236	-0.244042
-0.365633	-0.0462406	-0.194256	-0.496184	-0.0857635	-0.0850903	-0.110384	-0.0950111	-0.180154	0.117108	-0.0446166	-0.267581	-0.00147597	0.205642	-0.183818	0.0934424	0.102924	0.134508	-0.257849	-0.221651	-0.139076	0.00164605	0.134986	0.225592	0.0102288	-0.0521467	0.0934979	-0.221355	0.267823	-0.299523	-0.222256	0.0322734	-0.11913	-0.0869775	0.0350362	0.0810692	-0.0759387	-0.266424	-0.103826	0.200607	-0.468263	-0.091	-0.338411	0.0479742	9.16864e-05	-0.0215678	-0.0847624	-0.0653371	-0.231332	0.100295
-0.199485	0.140708	-0.0736465	-0.171981	-0.0565012	0.0755475	-0.127265	-0.108868	0.190586	-0.0168146	-0.191235	-0.243041	0.0620218	-0.111739	0.0566861	0.135233	0.208722	0.155336	0.101629	0.0861687	-0.11112	-0.107737	-0.10271	-0.202137	-0.155515	0.00348872	0.0217659	-0.18277	-0.203195	-0.0669172	0.151455	0.0673866	-0.137113	-0.127538	0.350364	0.024786	-0.108598	0.247989	0.242692	-0.206064	0.14128	0.138749	0.181744	-0.157957	0.0330214	-0.163036	0.359009	0.041232	-0.146506	0.103714
0.216799	0.199821	0.247066	-0.426411	-0.125323	-0.0948357	-0.0869058	-0.113263	0.108257	0.166179	-0.0493273	-0.279548	-0.254315	-0.0735582	0.0221671	0.0520659	-0.274207	0.110103	-0.165577	0.00723423	-0.17927	0.00340797	0.142178	-0.0304124	-0.040898	0.289488	-0.148152	-0.176028	-0.13223	-0.115231	0.0795659	-0.0109861	0.0596755	-0.106409	0.263297	-0.306776	-0.00640146	-0.268464	-0.183832	0.0305425	-0.385362	-0.135094	-0.197698	0.105783	0.020481	-0.179472	0.0270465	0.0486877	-0.21628	0.0850613
0.300511	0.0897359	-0.0858256	-0.519719	0.303314	0.157657	-0.0230897	0.0836231	-0.277549	0.121844	0.118727	-0.0811535	-0.0756688	-0.210416	-0.0129745	-0.179225	0.20843	0.0687592	-0.0815103	0.4943	0.0865703	-0.0551359	-0.272383	0.0465795	-0.152824	0.0349235	0.163028	0.207117	0.219	-0.399184	0.144412	0.08111	-0.0752798	-0.133702	-0.089616	0.075332	-0.0367417	-0.252891	-0.148239	-0.0357013	0.128594	-0.0954975	0.125568	-0.0694018	0.0077045	0.0792294	-0.143089	-0.0636152	0.33021	0.118362
-0.447853	0.259595	0.010183	1.12878	-0.00259025	0.417924	0.165958	0.0385066	0.180826	0.15141	0.173203	-0.370952	-0.0286718	0.246054	0.194464	0.296289	0.164142	0.105998	0.234938	-0.140502	-0.104847	-0.103145	0.325086	0.0136449	-0.136337	-0.0187889	0.0668524	-0.235424	0.259415	1.58864	0.117778	0.233202	0.008264	-0.0229944	0.240081	0.23517	0.0308458	-0.284617	-0.0951494	0.163228	0.116759	-0.0783079	0.345228	-0.345621	0.0491267	0.225029	0.286604	0.221253	0.00748709	0.167144
-0.498891	-0.173506	-0.149724	0.275069	-0.0439121	-0.0710912	-0.0863605	0.0659253	-0.0262808	0.157637	0.0676264	-0.396786	-0.16289	0.266616	-0.209617	0.0610774	0.0309407	0.110421	-0.403378	-0.0301493	-0.130446	-0.0751505	0.033598	0.143181	-0.0379732	0.290486	0.078422	-0.104552	-0.289	0.347846	0.121247	-0.14778	0.10942	-0.0919962	-0.156315	-0.440221	0.0648203	0.0682765	-0.164713	0.183037	0.0969671	-0.116772	-0.344234	0.0552967	-0.24855	0.243214	0.377729	0.0643428	-0.108981	-0.172412
0.322332	0.197345	0.210792	-0.409087	0.086683	-0.394219	0.147928	0.0728342	-0.204615	0.0998158	0.117461	0.348353	-0.0575495	-0.280149	-0.139555	-0.226125	-0.194929	0.0790657	-0.031447	-0.1274	0.202271	-0.021474	0.0864728	0.206682	-0.161246	-0.0629908	-0.062104	-0.232073	-0.0528725	2.01736	0.123033	-0.110942	0.0208545	-0.0570517	-0.148121	0.182674	-0.0513117	-0.298907	-0.0462478	0.182381	0.0616511	0.0201549	-0.191856	-0.067014	0.0532558	-0.15565	0.175819	-0.091659	-0.11725	0.114767
0.351988	0.0291466	-0.0505594	0.541098	0.116975	-0.101622	0.170741	-0.0690502	0.251804	0.107338	-0.000408993	0.264952	-0.117482	-0.216271	-0.242311	0.0913664	0.0716128	0.0899283	0.0156251	-0.446874	0.00913324	-0.068841	-0.222647	0.223444	-0.160461	0.0148305	0.054019	-0.185717	-0.114165	-0.613737	-0.272797	0.118552	-0.195635	0.169883	-0.0646247	-0.0586948	-0.0506504	-0.288762	-0.015722	-0.0421965	-0.409176	0.268877	-0.287222	0.0751946	0.11421	0.0982065	-0.0756294	-0.0701406	0.231335	0.102587
0.183358	0.0865371	0.326959	0.26799	-0.0828404	0.169709	-0.123481	-0.138454	0.221192	-0.334321	-0.121767	0.279818	-0.117388	-0.10647	0.0921462	0.285738	-0.382601	0.108885	0.0727027	0.0856452	0.0225568	-0.0410817	-0.054206	-0.0154657	0.00866726	0.245547	-0.143031	-0.172894	-0.103869	-0.410141	-0.0577686	-0.13775	0.0318784	-0.117119	0.0208242	-0.358232	0.0074647	0.229802	-0.067517	-0.11803	0.0808435	0.0728802	0.147248	-0.131712	0.0242942	-0.150773	-0.282767	-0.0758354	-0.193012	0.0968627
0.224322	-0.175288	-0.0667755	-0.532023	0.280204	-0.286881	-0.103527	-0.0925415	0.260142	0.0365214	0.0864608	-0.101378	-0.0555263	-0.283157	0.0570958	0.19977	-0.178478	-0.409965	0.107813	-0.371059	-0.0443717	-0.0913647	-0.243519	-0.0308219	-0.148619	-0.0508678	0.111504	-0.112112	-0.298537	-0.50781	-0.0406871	-0.193405	0.0246108	-0.114427	-0.156623	0.235415	-0.0494552	-0.271092	0.234646	0.153796	0.0727866	-0.110555	0.111798	0.149404	-0.108825	0.0385394	0.124318	0.0569457	-0.2338	0.120025
0.22597	0.0470174	-0.148763	-0.511631	0.061724	-0.0627764	-0.0881335	0.0971973	0.123932	0.140829	0.128425	0.24817	0.0713239	-0.103806	0.0636339	0.0615739	0.193691	-0.455679	-0.163885	0.458884	-0.131602	-0.0887425	-0.363222	0.303671	-0.0427566	-0.027972	0.13365	0.255839	0.323734	0.0475116	0.0959341	0.0995204	-0.120566	0.300121	0.185893	-0.13375	0.0135028	-0.25329	-0.031159	-0.137995	0.0798422	0.0821559	-0.302253	-0.0696631	0.0334927	0.0929785	-0.320565	-0.0760761	0.0751586	0.0448944
0.252606	0.202462	0.171063	-0.500456	-0.107502	-0.106808	0.15796	0.137232	-0.065691	0.148574	-0.108537	0.248594	-0.0980308	-0.147766	0.197213	-0.196503	0.269085	0.182148	0.233901	-0.290918	-0.121691	0.367116	-0.0235658	0.0203869	0.0417921	-0.228138	0.0957433	-0.31653	-0.056901	-0.630778	0.130334	0.273348	-0.154663	0.394206	0.0476922	0.0446308	-0.00351123	-0.0839892	-0.0316437	0.200561	0.0287576	0.0752344	0.0890455	-0.324299	0.0697998	0.0321772	-0.266423	-0.0848179	-0.0965058	0.0828254
-0.23053	-0.0153559	-0.136049	-0.529762	0.410845	-0.0949598	-0.0766435	-0.131954	-0.248236	0.165056	0.0012063	0.280162	0.0638252	-0.235265	0.0844718	-0.207214	0.274736	0.147601	0.238298	-0.217519	-0.142333	-0.108995	0.0570539	-0.0139559	0.0458865	-0.0386022	0.121517	-0.0477568	-0.0555952	-0.12168	0.17103	0.0513194	-0.106277	-0.139009	-0.178317	0.138964	0.0948057	-0.0707367	-0.181321	-0.0887977	0.139211	-0.133016	0.106242	0.119674	0.00838747	-0.166517	-0.126338	-0.0780898	-0.129904	-0.249256
-0.0589675	0.173241	-0.059532	1.54818	-0.111756	0.268635	0.161771	0.109456	0.240468	0.183053	-0.0691413	0.246225	0.0150787	0.181437	-0.0114397	0.322073	0.106656	0.0947076	0.197097	-0.017646	-0.0726838	-0.0830904	0.118002	0.19916	-0.110682	-0.0202073	-0.0579122	0.292301	0.279993	1.9152	0.108027	0.0980834	-0.168468	0.219872	-0.109608	0.209279	0.109399	0.41587	0.0128859	0.237018	-0.554852	0.122347	0.164942	-0.11148	0.0366548	-0.128443	-0.00805413	0.227348	-0.226712	0.144967
-0.410009	0.204441	-0.137849	-0.455761	-0.121383	-0.3255	-0.0917096	-0.0636716	0.156348	0.14464	-0.055707	-0.197919	-0.0802472	-0.267126	0.304302	-0.236207	-0.220015	0.141097	-0.29307	0.0753905	0.0394399	-0.0829074	-0.22359	-0.245177	0.26769	0.155301	-0.152461	0.151469	0.283632	-0.526087	-0.0873431	-0.184356	-0.117353	0.31834	0.226821	0.137161	-0.0748711	-0.399516	0.173631	-0.046162	0.0949892	-0.115361	-0.0669618	-0.172113	0.0478499	-0.116531	0.124886	-0.0734497	0.339153	0.104039
0.192892	-0.13315	-0.179771	-0.475894	-0.114044	-0.0901833	0.00872893	-0.0834551	-0.198439	0.0928494	0.0967548	-0.0755526	-0.264484	-0.184574	-0.222664	-0.210982	0.266354	0.0957876	-0.124901	-0.351925	0.0139756	0.260525	0.139608	-0.099619	-0.121689	-0.0276786	-0.00288286	-0.160917	-0.31798	-0.588734	-0.0763783	0.268138	-0.100551	-0.0697886	0.301229	0.13016	0.113971	0.279834	0.0111355	-0.171448	0.1494	-0.284785	-0.174069	0.0673319	0.0669667	-0.149441	-0.0378284	-0.0835641	-0.189816	0.0893698
0.133144	-0.230444	-0.0773358	-0.460179	-0.143727	-0.105738	-0.0196767	-0.114708	0.171792	0.197338	-0.0177063	0.00777422	0.348692	-0.0805352	-0.191338	-0.106479	0.0798014	-0.0318153	-0.0159531	-0.287302	0.0924013	0.00829532	-0.220273	-0.0446658	-0.148759	-0.0400499	-0.0940209	0.291722	-0.14687	-0.615502	0.157467	0.00884377	0.127202	-0.190871	-0.147272	-0.292011	-0.0724203	-0.0314831	-0.202863	-0.191218	0.121501	-0.236735	-0.188468	0.0939857	0.0483334	-0.15699	-0.192019	-0.0838759	-0.132797	-0.212239
-0.322289	0.139264	-0.0378824	0.525994	0.0131341	-0.0994002	0.202323	0.023664	0.208698	0.137835	0.118304	0.0799184	0.0514821	-0.237718	0.243713	-0.0447001	0.0948829	0.219054	0.193162	0.132449	-0.0906111	0.2594	-0.283281	0.0217597	0.227442	-0.0729484	0.0285018	0.287928	0.246347	-0.267871	0.0811935	-0.0183742	0.170779	-0.0186862	0.210433	0.260848	-0.050384	0.161647	-0.0492165	0.263413	0.134285	0.350525	0.00420477	0.109071	0.111139	-0.0812319	0.137815	-0.0615939	0.262921	0.197198
-0.51964	0.10161	-0.00703354	0.100267	-0.112897	-0.358911	-0.0779222	-0.0239095	0.100364	-0.106031	0.100454	-0.319209	-0.0727402	0.294083	-0.199522	0.0659785	-0.36802	0.102925	-0.159594	0.302129	0.0450472	-0.0612272	0.247661	-0.211984	0.0569178	0.243856	0.0831551	0.282047	-0.240045	0.917234	0.12928	-0.121145	0.0376623	-0.106441	-0.103709	-0.422153	-0.0267948	-0.188289	-0.137729	0.168481	0.10985	-0.334543	-0.152349	-0.122607	0.074713	0.110777	0.201511	0.0481146	0.443334	-0.195263
0.227018	0.230018	-0.031983	1.5115	-0.14726	0.23614	0.0919003	0.06551	0.214392	0.14803	0.0774503	0.295808	0.308997	0.249683	0.238963	0.339901	0.148152	0.17012	0.102799	0.575329	0.0847805	0.192795	0.209223	0.114739	-0.139477	-0.0241402	0.111851	0.228573	0.306507	1.82259	0.146653	-0.0297991	0.125831	0.268815	-0.173052	0.0973757	0.0583346	0.238401	0.1925	-0.214445	0.122248	-0.0659761	0.127985	-0.0940382	0.0526251	0.188007	0.166988	0.213534	0.368575	0.141501
-0.353688	-0.201356	-0.176677	-0.482423	-0.14518	-0.312134	0.182871	-0.128282	0.14386	-0.0875552	0.101555	0.28886	0.0945685	-0.180154	0.0475273	0.104613	0.122648	0.080094	0.02005	0.560069	-0.119945	-0.0827285	0.133471	-0.0278199	0.232257	-0.00377167	-0.0795111	0.233778	-0.239689	-0.335386	-0.0484035	0.139707	-0.14497	-0.124942	-0.161079	0.194709	-0.0334365	-0.296596	0.20942	0.241194	0.142831	0.357386	0.0140256	-0.0975852	0.0350694	0.057571	-0.0603828	-0.0745511	0.207102	0.0345476
-0.415096	0.343801	-0.166704	-0.105847	0.267655	-0.0750003	-0.06471	0.0692299	-0.0907222	-0.305434	0.103852	-0.284947	-0.0618643	0.256919	-0.1631	0.294723	0.100766	-0.0365695	-0.441995	0.614658	-0.110659	-0.0770992	0.339146	0.0268349	0.339142	-0.259823	-0.11467	0.306575	0.142157	0.162556	-0.00375053	-0.181491	0.109265	0.23174	0.147526	0.114853	-0.046136	-0.0486652	-0.144236	0.0124212	0.0825439	-0.189032	-0.194539	0.0803113	0.0540527	0.21466	-0.201936	0.260532	-0.200605	0.159166
-0.270445	0.206974	0.159713	-0.477989	0.319783	0.105322	0.0375582	0.11295	-0.168872	-0.135619	-0.131651	-0.197159	0.0429639	-0.160622	0.0112408	-0.201501	0.169655	0.202203	0.111949	-0.282597	0.182757	-0.0860176	0.0314593	-0.150032	-0.0611192	-0.0897622	0.0901702	-0.0886287	0.293933	0.299729	-0.0863657	-9.80011e-06	-0.178674	-0.0296556	0.217269	-0.297194	0.0772998	0.114282	0.293214	0.219995	-0.484242	0.243291	0.146217	0.0486418	0.0431042	-0.137131	0.124459	-0.0759172	-0.139663	-0.182291
-0.0834009	-0.306368	-0.0585583	-0.510019	0.270255	0.101041	-0.102327	-0.138267	-0.252065	-0.0799598	-0.146377	0.0179479	0.368677	-0.107451	0.00237726	-0.0515382	0.238152	-0.419923	-0.00349638	-0.293634	-0.0982641	-0.102596	-0.230766	-0.275167	0.0516467	-0.0177375	-0.0593306	-0.0611633	-0.0404313	-0.477459	0.140615	0.3383	-0.181254	-0.127878	-0.0169795	-0.120062	0.0726309	0.216936	-0.110752	0.282382	-0.362781	0.30422	0.138142	0.0849146	0.0707643	-0.0132591	-0.112212	-0.0877038	-0.253324	0.10783
0.177345	0.200475	-0.0332586	1.62843	0.306785	0.269652	0.101948	0.0873335	0.225381	0.14894	-0.135421	0.217282	0.0307962	0.248166	0.210952	0.137434	-0.043601	0.174604	0.249364	0.28523	0.282816	0.236507	-0.156011	0.263592	0.0864284	-0.0123891	0.159254	-0.085859	0.189581	1.96064	0.134677	0.102453	-0.0822013	0.281949	0.0850406	0.0625331	-0.0976576	0.0560131	-0.106348	-0.0316126	0.133053	-0.0515679	0.104418	-0.0481299	0.0769236	-0.115912	0.303815	0.0344221	-0.031822	0.131902
-0.521488	0.0696693	0.303559	0.539803	-0.00855455	-0.120418	-0.058898	0.0456441	0.222065	0.0716381	0.11087	-0.324743	-0.0240474	0.244888	-0.227716	-0.0389108	-0.23797	0.0633525	-0.0424142	0.058942	-0.138615	-0.0852988	-0.240675	0.022079	-0.120835	0.225197	-0.123123	-0.371106	0.24789	0.0934968	-0.0226787	-0.15016	-0.093579	-0.0861722	0.180276	0.208041	-0.0626315	-0.30784	-0.110989	-0.0110465	-0.444891	-0.290569	0.00668612	0.130115	-0.00459164	-0.0351547	-0.340217	-0.061387	0.20404	0.137689
-0.38569	0.29234	-0.0806899	0.751149	-0.158099	-0.0739814	-0.112778	0.0953481	-0.0814099	-0.10436	-0.0976801	-0.42255	0.0632491	-0.0728529	-0.186914	0.296463	0.165176	0.0677851	-0.217071	0.574057	-0.145245	-0.0965344	0.164608	-0.0149242	-0.117661	-0.19808	0.0680981	-0.14672	-0.223837	-0.195231	0.129755	0.325234	0.0608734	0.173341	0.0413533	-0.0500296	-0.0597367	0.220511	0.21222	-0.0592186	-0.366097	-0.297089	0.136776	-0.0803362	0.0234976	0.214235	-0.0343925	0.0525956	-0.229839	0.116957
-0.000585926	-0.194103	-0.0643129	-0.485363	-0.0942203	-0.0786681	0.0428909	-0.122282	0.198902	-0.00490734	-0.122246	-0.125411	0.338219	-0.258908	0.203943	0.0279386	-0.150685	-0.0457604	0.0741885	-0.300583	0.00142925	0.341895	-0.0662562	0.00728014	-0.153991	-0.0471601	-0.134247	0.263949	0.195302	-0.632123	-0.163687	-0.143829	-0.112553	-0.0404184	-0.134174	0.187989	-0.0594671	-0.285435	-0.0533718	0.184814	0.0672929	0.051143	0.108297	0.146385	-0.273571	-0.10589	0.146618	-0.0748666	0.0107875	0.12586
-0.172811	0.0498689	-0.00958938	-0.193073	-0.0146147	-0.0522765	-0.0538213	-0.0483234	-0.126103	0.119353	0.155216	-0.0259868	-0.279157	0.140646	0.224431	-0.196818	0.196425	-0.00102317	0.017322	0.131453	-0.111405	-0.0776575	-0.254316	0.0356679	0.214868	-0.0409926	0.115274	-0.0564248	0.223815	0.124585	-0.223673	-0.11914	0.103902	-0.132043	-0.0829335	0.205209	-0.0744795	-0.285739	-0.140742	-0.14774	-0.315726	0.233479	0.0456209	0.0832397	-0.0889509	0.224236	0.00042185	-0.0803177	0.050991	0.0940721
-0.115578	-0.0444218	-0.00244929	1.66673	-0.0479322	-0.0591121	0.173095	0.108067	0.245681	-0.247156	0.0882822	-0.0044374	0.0997987	0.1917	0.102855	0.0425628	-0.328337	0.127073	-0.0779062	0.586548	-0.0775577	0.0120365	0.139709	0.157589	0.0877876	0.250456	0.102908	0.275938	-0.270739	1.61284	0.123744	-0.133109	0.166948	-0.112119	-0.1122	0.316221	0.0603687	-0.0359509	0.236126	0.214193	0.0513802	-0.280485	0.18053	0.164952	-0.262978	0.0677941	-0.158632	0.0468304	0.427524	0.13125
-0.196197	-0.236622	-0.123648	-0.210726	-0.12849	-0.37889	-0.0963415	0.118276	0.219676	0.140729	0.0929388	-0.317002	0.0715227	-0.110004	-0.186385	0.237555	0.229826	0.0968825	-0.119765	0.663344	0.115495	-0.0590821	-0.238628	0.0255721	0.0392558	-0.0398236	0.063408	0.275425	-0.0355722	0.45994	-0.0366252	0.385938	0.0307345	-0.10196	0.025523	-0.423977	0.0219417	-0.24552	-0.0808871	-0.122135	0.0937884	-0.273994	-0.319635	0.0716644	0.0673094	-0.00775596	-0.0362082	0.274238	0.0125734	0.103706
-0.192473	-0.0962008	-0.0112715	-0.523253	-0.11961	-0.0865386	0.178803	-0.114631	-0.0295632	-0.215307	-0.153073	0.203419	-0.215145	-0.0161968	0.22423	0.313807	0.253447	0.137439	-0.0437169	-0.339126	-0.123972	0.278123	0.0669789	0.128328	-0.108396	-0.0364107	0.0805251	0.255647	-0.319879	-0.145382	-0.0667691	-0.178152	0.0146695	-0.0936163	0.123147	0.0940333	0.101841	-0.290382	-0.0715075	-0.0726551	0.0773333	-0.110426	0.0592686	-0.0681096	0.00564989	-0.124846	-0.0335493	-0.0710444	0.392708	-0.0802584
0.227621	0.0707059	-0.0254063	-0.454189	-0.144228	0.459015	0.0569573	0.0922834	-0.324285	0.157251	-0.0333119	-0.295867	-0.0463443	-0.23332	0.022566	0.10488	-0.313344	0.146462	0.0596702	0.453667	-0.125893	0.283587	0.0663148	-0.0468714	0.0651375	-0.0348736	0.0834398	-0.159497	0.256283	-0.32149	0.0296963	0.0386095	0.0494045	-0.0681563	-0.103844	0.158806	-0.0512278	-0.00244393	0.00961226	-0.0441916	0.0796817	-0.121829	0.141998	-0.109743	0.0847236	-0.192247	0.182859	-0.0687969	-0.0774168	0.121077
-0.0458533	-0.311222	-0.0116194	-0.476587	-0.0404182	-0.265458	-0.0914	-0.00477583	-0.213686	-0.284597	0.0881838	-0.0713411	0.281961	-0.179805	-0.174152	0.052716	-0.172519	0.0275725	-0.361385	0.198209	0.0242341	-0.0721659	0.381388	-0.191451	-0.012661	0.0237773	0.109173	-0.256807	-0.395088	-0.566904	0.124191	-0.236128	0.0569519	-0.127038	0.230913	0.113723	-0.088275	0.124874	-0.138611	0.00399393	0.140099	0.0759267	-0.346885	0.0919031	0.078664	-0.17889	0.162028	-0.0728476	-0.121826	-0.189662
-0.118659	0.0573348	0.297661	1.45166	0.279071	-0.119051	0.189836	0.0856107	0.20017	0.164526	5.33067e-06	0.141101	0.391692	-0.302903	-0.186742	-0.139322	-0.12378	0.163163	-0.116887	-0.449532	0.0157513	0.289131	-0.0363641	-0.257872	-0.157259	-0.0382063	-0.109143	-0.151173	-0.0382138	-0.320539	0.123405	0.12841	0.0211974	-0.120996	-0.107729	0.184664	-0.05852	-0.318326	-0.0394418	-0.0393446	0.130303	0.0811894	-0.200248	0.104499	0.0810827	-0.139136	-0.00309491	-0.075524	0.403581	0.131554
0.299179	-0.248534	0.250378	-0.400222	0.228175	-0.147895	-0.13871	-0.166911	0.0603621	0.137454	-0.18383	0.156018	0.0355335	-0.225252	0.0332556	-0.15434	0.28377	-0.10901	0.219932	-0.334087	-0.125907	-0.03721	-0.317871	-0.02756	-0.165159	0.0216851	-0.00560811	-0.0890953	-0.28787	0.475506	0.107237	-0.17937	0.00134843	-0.155771	-0.130475	0.11544	-0.0497269	0.0798969	-0.189143	-0.0350988	-0.439129	0.016183	0.159239	-0.258543	0.0441475	-0.190172	0.0856212	-0.0850402	-0.13914	0.109841
0.185075	0.0668821	-0.0778308	-0.546718	-0.159381	0.112516	-0.119489	0.136353	-0.0660474	0.118258	0.118686	0.0310258	-0.10782	-0.158767	0.139787	0.017807	0.267261	0.0984021	0.1945	-0.386395	0.0884896	-0.0706257	-0.106191	0.0197204	0.0161744	-0.0121514	0.129507	0.320255	-0.385465	1.34296	-0.115666	0.313877	0.0669586	-0.051728	-0.105687	0.128422	-0.0366159	0.0609288	-0.137334	-0.0744878	0.0953487	-0.113309	-0.187817	-0.104234	0.0669416	-0.0415073	-0.0176113	-0.0833268	-0.27183	0.127486
-0.44849	0.0691416	-0.0897354	-0.0368824	-0.136484	-0.314271	-0.0517315	-0.10027	0.199975	-0.156941	-0.0316338	0.132875	0.0349831	-0.186807	-0.186497	0.00496539	-0.249778	-0.390472	-0.117459	0.0755246	-0.153548	-0.088391	-0.175492	7.45036e-05	-0.0565218	-0.0377108	0.104114	0.26136	0.16953	-0.557995	0.00208341	-0.243057	-0.105808	-0.0472985	0.199369	0.18019	-0.0958548	-0.299929	0.194148	-0.078661	0.0439462	-0.243544	0.0620355	-0.158936	0.0448984	0.073953	-0.323112	-0.0661243	0.241778	-0.257211
-0.430863	-0.143889	-0.0605618	-0.234847	-0.142332	0.489947	-0.0888917	-0.0839107	0.0889744	-0.356808	0.142843	-0.289052	-0.0560915	0.260624	0.00543527	0.0644926	-0.256751	0.130509	-0.124509	-0.120832	-0.10995	-0.0917414	0.0967684	0.12106	-0.149848	-0.0401259	0.0520765	0.29644	-0.0347616	-0.576065	0.117215	-0.0503878	0.0508791	-0.0793887	-0.0908055	0.0492159	-0.0999438	-0.225054	-0.209476	-0.0565169	0.0161646	-0.290321	-0.188806	0.101956	0.0778881	0.0904392	-0.238722	-0.0796862	-0.136073	-0.195375
0.34951	0.130823	-0.0728735	-0.469268	-0.125273	-0.0574634	-0.055356	-0.00034901	0.182576	0.165289	-0.0674563	-0.270364	-0.20485	0.177952	0.0984652	-0.137573	0.135578	-0.000624494	-0.0250153	-0.127757	0.175052	-0.0960822	0.110027	-0.148158	-0.104623	-0.017849	-0.0691844	-0.303273	-0.325802	0.323633	0.210501	-0.0186323	-0.084315	0.375131	-0.190337	-0.250039	0.05575	0.0629025	-0.0307472	-0.0275044	0.129004	-0.231921	0.0991421	-0.0991543	0.012519	0.0868193	0.0190062	-0.0783007	-0.13441	-0.167345
0.0347923	-0.00496595	0.146831	-0.510797	0.0208904	0.380632	-0.0530757	0.102991	0.101019	0.138134	-0.0846775	0.344987	0.0665336	-0.263867	0.0906913	-0.0200375	0.13272	0.153985	0.021328	-0.431384	-0.0480453	-0.048099	-0.204003	0.30435	-0.146814	-0.0466278	-0.112248	-0.218746	0.039378	-0.356962	-0.114998	0.258136	-0.179043	0.282623	-0.16905	0.0513892	-0.0246533	0.0598132	0.186231	0.172776	0.0615622	0.237173	0.207696	0.0934662	0.0399808	0.0266135	0.102965	-0.0855151	0.282899	0.0137749
0.101585	0.0770022	-0.0611153	-0.279057	0.0335094	-0.120475	0.169778	-0.0767135	-0.225418	0.105468	-0.169776	0.163222	-0.0649218	0.289145	0.103697	-0.230169	0.282793	-0.40328	-0.0564185	0.180954	0.0522194	0.36414	0.180075	0.0447322	0.0526133	-0.216536	0.116194	0.270318	0.44405	-0.0613771	0.0589529	0.0845702	-0.0913743	-0.0658628	0.207035	-0.287276	0.0778167	-0.277398	0.187811	-0.181427	0.0522066	0.0771094	-0.120256	-0.0955633	0.0411562	-0.0463898	0.0918663	-0.0704875	-0.0907524	0.127694
-0.145472	0.233194	-0.173342	-0.443602	-0.113343	0.109687	0.158637	0.104274	0.188007	-0.339288	0.117564	-0.298546	-0.0923225	0.186383	0.0530127	-0.0842111	-0.301237	0.0518018	0.0113683	0.383752	-0.0940251	-0.0944461	0.112466	-0.074111	-0.0531962	0.212504	-0.105283	-0.120202	0.377795	-0.294224	0.125564	-0.153565	-0.112451	0.434688	-0.00558621	-0.016443	-0.0398336	0.00575927	0.261295	0.201246	-0.362268	-0.277609	0.134581	-0.151325	-0.192751	-0.00930349	-0.332871	-0.0658118	0.0226093	0.122957
0.175551	-0.0463948	-0.191562	-0.409626	-0.10718	-0.125178	0.177071	-0.0258697	-0.217223	0.143489	0.107108	-0.142437	-0.252185	-0.205498	-0.138673	-0.130527	-0.207496	-0.363876	0.0347769	-0.277124	0.360492	-0.068793	-0.24691	0.0163806	-0.0455552	-0.0228876	-0.161485	-0.28175	-0.057724	-0.587506	0.168231	-0.024471	0.180602	0.447097	-0.116847	0.0406639	-0.0298561	-0.260377	0.00330787	-0.0846842	0.105944	-0.112802	0.111029	-0.0910999	0.000431718	0.128213	-0.339452	-0.0851062	-0.209747	0.0655203
0.0685123	0.1386	-0.22383	-0.497215	-0.144869	0.0647162	-0.000629629	-0.156293	0.130572	-0.199072	-0.0696292	0.260878	-0.281282	0.234911	0.0774546	-0.206395	0.162862	0.119025	0.11752	0.475904	-0.13689	-0.079303	-0.270285	0.0945602	-0.0396295	-0.0218507	0.0982537	0.180562	-0.206819	-0.594574	0.131969	-0.193081	-0.184358	0.315579	0.137718	-0.0701339	-0.0557011	-0.261797	-0.126201	-0.067182	-0.568762	-0.0736427	0.0604533	-0.291383	-0.0156125	-0.155109	-0.0496929	-0.0802809	-0.173261	0.0387479
-0.498871	-0.150258	0.192006	-0.331482	0.264289	-0.409982	0.204169	0.101644	0.173327	0.104975	0.0745804	0.294192	-0.186198	-0.237315	-0.0294576	-0.261037	0.157798	-0.0103918	0.0284594	0.555931	0.0193076	-0.0664212	0.0759807	-0.116986	0.0743768	0.0062093	0.124987	-0.084494	0.163438	-0.317701	0.0715957	0.149275	0.0722093	-0.126576	-0.145266	0.186213	-0.0842532	0.0156787	-0.0561575	0.00121678	-0.157477	-0.331777	-0.0118872	-0.157818	0.0488794	0.0625915	0.155125	-0.0620934	-0.037668	-0.237264
0.18794	-0.343616	-0.18785	0.126976	-0.146263	0.192602	0.0587301	0.0647352	0.224587	0.143902	0.104157	0.369733	0.309361	-0.126549	0.172002	0.225137	0.185886	0.120592	-0.362942	0.0477192	0.017372	-0.0662397	-0.384384	0.331639	0.052233	0.195555	0.14021	0.248198	0.23738	1.20201	0.122686	0.0520454	-0.140375	-0.0831829	-0.20544	0.281984	0.0791142	0.30517	0.145806	0.209294	0.150577	0.0843399	0.0837092	0.141864	0.0854729	0.126322	0.265223	0.0402503	0.0833135	0.129019
0.215498	0.119128	-0.1907	-0.525974	-0.138901	-0.118726	-0.0128081	0.0734295	-0.0246162	-0.0373072	0.118178	0.133353	0.371602	-0.207846	-0.139145	-0.183316	0.192879	-0.466801	0.243908	-0.318556	-0.108761	-0.0738008	-0.0877131	0.0893436	-0.020821	-0.0567456	-0.173287	-0.12938	0.162763	-0.540588	0.111024	0.215329	0.0157203	-0.178587	-0.196235	-0.069985	0.0108839	-0.241542	0.202796	-0.0770867	0.0963747	-0.112377	0.35145	-0.238095	0.0338759	-0.179127	0.186499	-0.0847348	0.0148939	0.120698
0.222045	0.0652166	-0.157799	-0.566306	0.102161	0.129075	0.181959	-0.0867623	0.172555	-0.110018	-0.202183	0.200654	-0.266029	-0.18004	0.119068	-0.0309334	-0.13395	-0.0330977	0.163403	-0.299995	0.302827	-0.0691266	-0.0330831	-0.188176	0.0527372	-0.0178529	0.10674	-0.176652	0.412951	-0.649248	-0.334457	0.319618	-0.166949	-0.108224	0.0301227	-0.190629	0.0378309	0.245703	-0.0294917	-0.0374411	0.123436	0.110062	0.0901968	-0.093589	-0.221699	-0.157045	-0.0334545	-0.0767059	0.232596	0.104228
-0.537198	0.0686785	0.0285673	1.57189	-0.159875	0.134792	-0.0664097	0.0535132	0.228675	-0.16837	0.0934907	-0.411686	0.283751	0.271142	-0.23672	0.29038	0.0422622	0.165703	-0.462888	0.505243	0.0299231	-0.0573052	0.0896085	0.209627	-0.0578112	0.172837	0.118344	0.266139	0.238309	1.92037	0.115246	-0.130704	0.135337	0.235652	0.140798	0.326087	0.0856223	0.220323	-0.140577	0.171643	0.095469	-0.126263	0.116261	0.116499	0.0425158	0.196911	0.16464	0.209038	0.369157	0.13305
-0.100373	-0.1995	5.24366e-05	-0.223823	-0.110439	0.0718632	-0.0930689	-0.00297561	0.251716	-0.168329	0.0867257	-0.177945	-0.0757793	0.239605	-0.256414	0.292422	-0.367518	0.0196348	-0.352768	-0.0341023	-0.00156654	-0.0892545	0.0198907	0.207617	-0.019006	-0.0857521	-0.112532	0.229222	-0.262687	0.318232	0.172428	-0.160906	0.116781	0.25734	0.225976	-0.45692	0.0687074	0.327927	-0.166966	-0.0382611	0.0944549	-0.206427	-0.251578	0.0874559	-0.243713	-0.0829973	0.169884	0.286976	0.328659	-0.187781
0.164086	-0.0238576	-0.0322179	0.534551	-0.124623	-0.0418835	0.0431392	0.141589	-0.185031	0.0824461	-0.173805	-0.21133	0.0463191	0.0758547	0.256802	-0.0398388	-0.284706	0.108325	0.171234	0.594495	0.0282939	-0.0567856	0.274378	-0.212274	0.205967	-0.0299399	0.119848	-0.117669	-0.143496	0.162884	-0.127516	0.133365	0.0405867	-0.0603051	0.159501	0.117563	0.126105	-0.278775	-0.150262	-0.0933412	0.077459	-0.0824139	0.0615536	-0.0852807	-0.0992558	0.128408	0.211369	0.0464221	0.0469922	-0.188777
-0.331394	0.112883	-0.19329	-0.186159	-0.0870282	-0.125452	0.161417	-0.0762744	-0.184939	0.13668	0.127881	-0.224762	-0.0780131	-0.14306	0.037532	-0.180756	-0.21819	-0.334701	-0.0224089	-0.0136967	-0.114434	-0.101046	-0.00389303	-0.119846	0.353828	-0.0824022	0.116396	-0.117883	0.181146	-0.633603	-0.0105814	0.0530258	-0.111278	-0.11789	0.277141	0.0603095	0.0317367	0.0694008	0.266842	-0.146133	-0.394716	0.122385	0.0825719	0.126957	0.0392963	-0.122336	0.331412	-0.0881011	-0.21972	-0.213222
-0.325452	0.0127161	-0.0846947	-0.271804	-0.0747902	0.283854	-0.101436	-0.100774	-0.127514	-0.288554	-0.0832468	-0.284669	0.0049347	0.210084	0.0480143	0.185495	0.0313665	-0.42441	0.172772	-0.120025	0.031696	0.324766	-0.277197	0.0742693	-0.0320726	-0.0337181	-0.12075	-0.165236	0.107382	-0.502344	0.110599	0.139118	0.0775699	-0.166381	-0.113259	0.168112	-0.0529821	-0.0533714	-0.0401478	0.134333	0.129147	0.214925	0.235497	-0.0944595	0.00776613	0.0253845	-0.105235	-0.0650964	-0.106761	0.0993158
0.139704	-0.321267	0.213618	-0.513627	-0.083382	-0.112526	-0.147843	-0.0252186	0.205945	0.104219	0.12531	0.366537	0.0766504	-0.0428542	0.216824	0.0902322	-0.177852	-0.111641	-0.292823	-0.310407	0.0171038	0.281299	-0.029085	-0.308142	-0.203722	-0.0559057	0.0966467	0.186864	-0.0961723	-0.0791526	-0.142358	0.148362	-0.127378	0.301457	-0.150067	0.128812	-0.059873	-0.269899	-0.127624	0.170653	0.138055	0.178141	0.387263	0.130194	0.0560459	-0.166257	-0.126755	-0.0642881	0.273339	0.0927391
0.115073	-0.172484	-0.0227336	1.06076	0.0648762	-0.275644	-0.0752542	-0.0573047	-0.117144	0.132373	0.106715	-0.185715	0.0866718	-0.037155	0.135296	0.235653	-0.270677	0.111958	0.129602	0.0151522	0.00998737	0.167652	-0.278378	-0.253343	0.276284	0.0372644	0.144256	0.178175	-0.291668	0.905575	0.147783	0.122935	0.0454388	-0.0316923	0.245574	0.252311	0.113018	0.249965	0.158039	0.186547	0.108635	0.0682299	-0.326236	0.140964	0.0564491	-0.10757	-0.163384	0.253326	-0.113936	-0.236648
0.128634	0.0260335	-0.186772	1.41532	-0.0702968	-0.115753	0.0272323	0.0963351	-0.151759	0.138105	0.0829338	-0.170034	-0.211045	-0.240525	0.1202	-0.229559	-0.152273	0.119812	-0.344503	0.0733222	-0.116554	0.234237	0.0622079	-0.0550872	-0.0589831	-0.00697415	-0.135171	0.199127	-0.266556	-0.0646401	-0.0779106	0.0590254	-0.0393435	-0.126129	0.0544159	0.119272	-0.0849405	0.309593	-0.137066	0.1541	0.0916345	-0.129442	-0.319518	0.094736	0.0252654	-0.0886356	0.326715	0.0563189	-0.202287	-0.223265
0.134286	-0.0883377	-0.0650978	0.134429	-0.064546	-0.14055	0.129164	-0.0294995	-0.0101077	-0.00453708	0.165073	0.221478	-0.0567746	0.193411	0.0527167	0.284887	-0.225395	-0.096666	-0.0708565	0.494017	0.0771538	-0.0225477	0.336366	-0.237216	-0.0299293	-0.0266694	0.0783005	0.249179	-0.313958	-0.480247	0.123175	0.169772	0.101394	-0.0658096	0.0497794	0.182588	-0.0778299	-0.272234	0.0217114	-0.049334	-0.420118	-0.26167	-0.245737	-0.10284	0.00590556	-0.063354	-0.371594	0.0203477	-0.269787	0.134066
0.307243	-0.108299	-0.018555	-0.328486	0.285346	-0.10273	0.229352	0.0965061	0.277944	-0.102617	0.141761	0.306429	0.0946979	0.213665	0.245123	0.169042	0.289434	0.2455	0.184652	-0.321047	0.0219667	-0.0412294	0.153886	0.237016	0.0687451	-0.0484406	-0.106402	-0.0913887	0.219655	-0.0682015	0.197748	0.295894	-0.15127	0.313868	0.108357	0.228756	0.0224445	0.389104	-0.0971585	-0.0470154	0.105447	0.248091	0.338013	0.121727	-0.278178	-0.138176	-0.0468953	-0.0606488	0.334769	0.145999
-0.138823	0.193043	0.0102424	1.59805	0.257055	0.330993	0.123282	0.00464816	0.212013	-0.322584	0.138929	-0.178523	0.31031	0.221461	0.0743485	0.255855	-0.326197	0.0208734	0.0909747	0.167562	-0.0962275	-0.0370765	0.317324	0.0230057	0.0590272	0.0228479	0.116373	0.243571	-0.190514	2.09376	0.162691	-0.139433	0.149693	0.203478	0.192342	0.330906	0.0866484	0.134221	-0.13336	-0.0101032	0.040264	-0.00321936	0.281769	-0.0924658	0.0371431	0.0968446	0.0743264	0.266754	-0.217297	0.185757
-0.232801	0.0479925	-0.0443444	-0.277863	0.385003	0.537877	-0.101685	0.104496	-0.150201	-0.0365535	-0.108777	-0.305567	-0.0825972	0.12761	-0.215651	-0.103211	-0.259426	0.163025	-0.0511777	0.0166568	-0.131886	-0.0192926	-0.0776471	0.0660162	-0.0527275	-0.029266	-0.113553	-0.11648	-0.117182	-0.301014	0.102975	-0.0463103	-0.0943857	-0.0939384	-0.148565	-0.263822	-0.0185091	-0.248694	-0.0552905	-0.227242	0.0730686	-0.103903	-0.341147	0.0360063	-0.234443	0.00159887	-0.0701867	-0.0734812	0.32866	0.0744767
0.175231	0.176425	-0.160036	-0.344095	-0.11672	-0.10232	-0.0297551	0.0645437	-0.191546	-0.292437	-0.126824	-0.331688	-0.0145626	0.295761	-0.252027	-0.140388	0.233462	-0.0759077	0.00505034	0.68736	-0.129816	0.237442	0.398264	0.0795893	-0.146393	-0.0658955	-0.000305059	-0.161253	0.245532	-0.385834	0.00478071	-0.136121	0.0648772	-0.085233	-0.0560162	-0.092396	-0.0327015	0.269343	-0.213222	-0.0282427	-0.239324	-0.147507	-0.0417363	0.0797176	0.0244977	0.0723682	0.212545	-0.071821	-0.182605	-0.16797
-0.330406	0.144293	-0.0302594	-0.419744	-0.123633	0.404516	0.0382437	0.102842	-0.319209	0.182234	-0.15831	-0.260238	-0.0410021	0.234724	0.0403073	-0.184102	-0.279499	0.0856194	0.223395	0.610082	-0.12291	-0.128928	0.171408	-0.12417	0.0155407	-0.0210789	0.116682	-0.113228	-0.058123	-0.305665	0.115809	-0.18611	0.065781	0.337337	0.00727071	0.105248	-0.065369	-0.253687	-0.010399	0.0216288	-0.447607	-0.0931958	0.114597	0.133912	0.0563926	0.103043	-0.360101	-0.084339	-0.212242	0.108105
0.28397	0.156248	-0.0580739	-0.18017	0.0452281	0.226367	0.025876	-0.126503	0.195206	-0.158639	-0.216957	-0.0792856	0.0579946	-0.23214	0.0304846	-0.217239	0.0789037	0.156334	0.175519	0.104254	-0.105802	-0.0954069	0.124841	-0.113798	-0.120927	-0.043447	-0.134543	-0.098856	0.26613	-0.543493	0.146743	-0.199765	-0.127318	0.367388	0.208784	0.167546	-0.0843965	-0.288002	0.32162	-0.155071	-0.0225246	-0.110233	-0.286036	0.106692	0.0312921	0.034176	-0.295413	-0.0787558	-0.18393	0.13045
0.302299	0.0521587	-0.0351732	1.66176	0.0642625	0.259567	0.129267	-0.086665	0.201033	0.122564	0.135396	0.332774	0.289616	-0.171993	0.0867152	0.26201	-0.123211	0.142451	0.187195	-0.336501	-0.0528815	-0.0555629	0.00399291	0.221122	0.0698296	-0.0302509	0.105419	-0.055773	0.194877	1.94864	0.16813	0.222283	0.17752	-0.0476641	-0.180404	0.265784	0.0663216	0.303933	-0.0728699	0.231963	0.0764968	0.263408	0.352641	-0.130212	0.0654848	0.176921	0.153942	0.254473	-0.253713	0.155728
0.0540326	0.269513	0.311452	-0.310768	-0.119175	-0.110789	0.199495	-0.0962019	-0.0913704	0.118171	-0.101565	0.209929	0.00647103	0.333659	-0.196043	0.308635	0.190181	0.124753	0.00425571	-0.119338	-0.033511	-0.0880182	0.117578	0.2199	0.00919475	-0.0183903	-0.157775	-0.165731	-0.0338369	-0.555209	0.17652	-0.157121	0.103258	0.0184802	-0.106252	0.0947602	-0.0136701	0.280233	-0.0442865	0.253687	0.104158	0.392766	0.181504	0.087963	0.0421589	-0.186682	0.025953	0.063152	0.0996763	-0.191206
-0.0239352	0.237527	-0.0361525	-0.467738	-0.118206	0.445513	-0.0413929	-0.0769088	-0.0403673	0.192775	0.150508	-0.163148	-0.0590815	0.123884	0.290916	-0.15966	-0.207752	0.169448	0.254186	-0.279507	0.202391	-0.0824344	-0.298909	-0.288177	-0.0287932	-0.0250684	-0.0903283	-0.0891623	0.307724	-0.314903	-0.389264	0.125975	0.0548063	0.345658	0.22865	0.0492242	-0.0548212	-0.227643	0.199627	-0.187944	0.0543663	-0.0708481	0.113022	-0.287904	0.0254568	0.0383411	0.0190299	-0.0656879	-0.179023	0.0855374
-0.424632	-0.0695704	-0.122328	-0.497436	-0.00346576	-0.105708	-0.0881422	0.109238	-0.252592	0.145826	0.0977274	-0.375984	-0.0685713	-0.256561	0.176544	0.0772249	0.119577	-0.26288	0.00321605	0.588275	-0.0910582	-0.108881	0.203462	0.266889	-0.103702	-0.0694178	0.0978182	-0.162718	-0.0244659	-0.605366	0.110971	-0.218946	0.026965	-0.0918332	0.233692	-0.108308	0.0690425	0.0220097	-0.00729278	0.16641	0.113672	-0.178857	0.0604244	0.0595611	-0.0555479	-0.163648	0.115756	-0.0784806	0.00765766	0.11566
0.239995	0.199445	0.00209683	1.68574	0.315534	-0.0250483	-0.0581858	0.117175	0.197112	-0.0882044	0.0337744	0.309485	0.240639	0.141625	0.133053	0.321345	-0.296436	0.213021	0.175907	0.520133	0.125011	-0.0187665	0.125583	0.214787	-0.0142882	0.19542	0.113778	-0.0993238	-0.303162	1.95939	-0.0009696	0.00184782	0.0641946	-0.0785235	-0.117177	0.0152945	0.017889	0.301337	-0.112529	0.180563	0.0912602	0.161237	0.109528	-0.0558738	0.133167	0.178873	0.328178	0.233565	0.473485	-0.200402
-0.105502	-0.225026	0.379646	-0.539776	-0.0890683	0.0946276	0.216047	0.0999132	0.142331	-0.311254	-0.0364291	-0.0966643	0.0906308	0.259709	-0.167042	-0.0620672	0.161306	-0.00503134	-0.299573	-0.0937702	-0.0864082	0.354711	0.0376247	-0.237498	0.255842	-0.00711535	0.0861427	0.245891	-0.0670955	-0.59369	0.163759	-0.14395	-0.116937	0.183938	-0.00795564	0.130134	-0.0517378	-0.313146	-0.0771587	-0.0299284	0.114791	-0.297176	0.108943	-0.0660886	-0.203258	-0.0548826	0.125431	-0.0781592	-0.212871	0.104434
-0.190331	-0.148693	-0.16486	-0.00446124	-0.106493	0.469553	0.177806	-0.0641275	-0.0809549	0.203793	-0.124141	-0.264506	-0.10611	0.369402	0.0706189	-0.19099	0.176117	0.131264	0.195944	-0.265806	0.214506	0.298698	-0.224711	-0.0495073	-0.0963447	-0.0542494	-0.107465	-0.141947	0.188204	-0.268185	0.0828688	0.0165891	0.0212701	-0.116019	0.149368	0.153236	-0.0644479	-0.254312	-0.135296	-0.212175	0.0882024	-0.133032	0.0380753	0.116193	0.0184582	0.0683344	-0.218182	-0.0798465	0.166077	-0.25265
0.242419	0.254926	-0.167149	1.62247	0.295957	0.144904	-0.0350634	0.12058	0.230002	-0.149308	0.109625	0.338354	0.297132	0.234834	0.029184	0.319023	0.0536668	0.207368	0.211055	0.507338	-0.0633336	-0.028164	0.339087	0.226591	0.190817	0.209703	0.149935	0.245592	0.153602	1.92066	0.12581	-0.11067	0.108617	-0.0409147	0.164868	0.297314	0.108684	0.11426	0.163254	0.14242	0.146752	0.184203	-0.0890571	0.0912408	0.0689961	0.153069	0.219524	0.233285	0.342932	0.169849
-0.185014	-0.196724	-0.100662	-0.472717	0.0272682	-0.0716295	-0.122586	0.0829765	0.21661	0.161075	-0.131719	-0.147619	0.0637813	0.127047	0.271848	-0.0138338	-0.256677	-0.0832127	0.120663	0.0535532	-0.0969003	-0.0910127	0.140708	-0.0228727	0.0470438	0.319473	-0.145917	-0.315905	0.184833	-0.152783	-0.0657029	-0.0169611	0.169659	-0.125983	0.0224466	0.0811571	0.103802	-0.26326	-0.170836	0.203316	0.125671	-0.110598	0.151161	0.171622	0.078224	0.258507	-0.0501302	0.030571	-0.219322	-0.216931
-0.233557	-0.228243	-0.0584976	-0.420111	0.298584	-0.04698	-0.102405	0.156223	-0.0487932	0.118625	0.0875283	-0.153702	-0.0272584	0.286121	-0.136582	0.0920882	-0.394527	0.00801776	-0.0295295	0.475508	0.05263	-0.0740254	0.0458258	0.224128	0.340512	0.0563938	0.0621508	-0.106449	-0.249873	0.377022	-0.0064322	-0.109504	0.0567264	-0.154116	-0.179566	-0.48566	0.0596892	0.301766	-0.197041	-0.0346804	0.0165571	-0.114278	-0.120868	0.0571532	-0.254289	-0.164225	0.190833	-0.0815572	-0.115752	-0.189669
0.255696	0.0326884	0.018068	-0.479875	-0.119405	-0.0611118	-0.0885928	-0.122434	-0.15941	0.0777588	-0.00839253	0.261698	0.296014	0.262555	0.0574196	-0.183152	-0.157121	-0.00803666	-0.0997006	-0.366845	-0.101905	-0.0901094	0.32775	-0.0840848	0.00898449	-0.00604273	0.0747924	-0.26536	-0.00106127	0.874555	-0.306079	0.192977	0.144167	-0.1548	-0.101419	-0.0404684	-0.0914029	0.0554311	0.18702	0.182636	0.0471314	0.199702	-0.169758	0.10353	0.0468604	0.0471888	0.348871	-0.0753959	-0.179954	-0.234056
0.181505	0.0187434	-0.0584568	-0.527743	-0.131796	0.406752	-0.0800104	-0.0821742	-0.26269	0.133665	0.187604	0.0988428	-0.133351	-0.183647	0.189584	-0.161253	0.197765	0.14754	0.258283	0.0690024	-0.103344	-0.098086	-0.327018	-0.282208	-0.0798339	-0.0305034	-0.0883724	-0.223418	0.338534	0.95568	-0.0310164	0.158088	-0.148325	0.386392	0.0561063	0.165906	-0.0550658	-0.307015	-0.078535	-0.00864986	-0.45279	0.0308186	0.0773774	-0.0732478	0.0532419	-0.142727	-0.237882	-0.0816634	-0.182183	0.12138
-0.351313	0.0160557	0.224074	-0.487873	-0.0827276	-0.0932597	0.00799498	-0.0352605	0.234122	0.206049	-0.182372	-0.221417	-0.294364	-0.105379	0.219837	-0.210489	0.208802	-0.078532	-0.0134346	-0.316879	-0.0151548	-0.121721	-0.338604	-0.2001	-0.11026	-0.0119897	-0.105331	-0.181124	0.214647	-0.581842	0.0613413	0.104772	-0.0911478	0.214163	-0.0748002	0.164162	-0.0780347	-0.136385	0.251301	0.126398	0.124023	-0.107921	-0.139789	0.117068	-0.139578	-0.134755	-0.295407	-0.087713	-0.148076	0.113818
-0.00615163	0.173513	-0.042076	-0.437105	-0.0992751	0.378722	-0.031716	-0.038805	0.187347	-0.161642	-0.168	-0.104541	0.0540346	0.297796	0.0619284	-0.225008	0.203379	0.0167568	0.132974	0.336762	-0.0460313	-0.0959242	-0.295865	-0.125123	0.0531217	-0.00403506	-0.137522	-0.161268	-0.261815	-0.470186	-0.00494312	-0.00667486	-0.154364	0.381496	-0.00746953	0.0961061	0.0161661	0.0809471	-0.150787	0.255105	0.160549	0.329487	0.100166	0.137014	0.019858	-0.16498	-0.266336	0.0513525	-0.232748	-0.203123
-0.462604	0.229977	-0.0147994	-0.44837	-0.113242	0.0998652	0.177711	0.0501834	0.0546069	0.192427	0.142832	-0.271131	-0.0820989	0.180459	0.0227975	-0.00367379	-0.18346	0.144672	0.107276	-0.0741155	-0.0624365	-0.0829182	-0.238989	-0.254398	0.0459995	-0.192482	0.0992846	0.285521	0.30961	1.26979	0.149896	0.290727	0.0185788	0.348312	0.194751	-0.0797911	-0.0212258	-0.308079	-0.100833	0.176941	0.0309309	-0.097516	0.103579	-0.324464	0.0969997	-0.147492	-0.364483	-0.0612056	0.274688	0.126326
0.203061	0.0707317	-0.0631596	-0.0788402	0.0166788	0.396624	-0.0214842	-0.0761936	-0.338749	0.174886	0.151402	-0.0250492	-0.015181	0.27384	0.1368	-0.191256	0.190389	-0.443807	-0.0279273	0.397989	0.268185	0.0450022	-0.394015	-0.312484	-0.0961735	-0.00575718	0.0761824	0.224534	0.387882	-0.466504	-0.377789	0.0661879	-0.137207	0.344175	0.141787	0.175196	-0.0646654	-0.0151324	0.197921	-0.0512711	0.0424911	0.198245	0.105814	0.097455	0.048643	-0.130204	-0.33221	-0.0704276	-0.202765	0.13548
0.227277	0.0557122	0.275204	-0.195734	0.149555	0.22572	-0.0819448	-0.0952923	0.180743	0.16213	0.0681281	-0.0932901	-0.00864931	-0.197053	0.0420037	-0.0644932	0.238777	0.0252504	0.102211	-0.368847	-0.0061701	0.236414	0.202109	0.0263878	-0.124287	-0.0366855	-0.0741465	-0.30382	0.0824698	-0.107708	-0.116748	0.319891	0.0734392	0.171098	0.0133039	0.105919	0.00803999	0.131922	0.209654	0.00873507	0.0805054	0.385838	0.0199885	-0.1334	0.062647	0.0642102	-0.298526	-0.0777069	-0.157805	-0.238772
0.209139	0.0927582	0.144491	1.72502	0.0978531	0.125564	0.169532	0.0230816	0.199234	-0.00927659	-0.161564	0.330808	0.102454	-0.158758	0.125605	0.0510817	0.214293	0.0166965	0.145225	0.573747	-0.0939677	0.212425	0.325067	0.127228	0.0475289	0.219229	0.169496	0.266718	-0.0218652	1.43748	0.136162	0.123686	0.231456	0.0521107	-0.136697	0.111467	0.0774806	0.334855	-0.11844	0.18781	0.100114	0.119879	0.195061	0.127727	0.0506785	-0.124958	0.093845	-0.0823196	0.273204	0.117049
0.190355	-0.290206	-0.179751	0.391461	0.319885	-0.129581	-0.00422435	-0.0948253	-0.195126	0.121654	-0.0667466	-0.142725	-0.315713	0.32139	-0.223437	0.0562194	-0.144062	0.214962	-0.123227	-0.0582105	-0.134415	0.179076	0.145216	-0.0290442	-0.0323901	0.0139266	-0.176046	0.20342	-0.292748	-0.533352	0.166405	-0.212235	0.138141	0.264105	0.0123372	-0.341845	0.0617233	0.293357	-0.0476279	0.193159	0.0383414	-0.151925	-0.393634	0.0532592	0.120298	0.00482484	-0.134048	-0.0663106	0.343422	0.0977123
-0.21492	0.241409	0.369147	0.286934	-0.106401	0.283422	-0.0928786	-0.135345	-0.0529204	0.217136	-0.155938	0.10654	-0.0292794	-0.00589951	-0.161351	-0.264707	-0.241696	-0.474946	0.03615	-0.0480824	-0.11796	-0.0677873	-0.176261	-0.0539211	0.00154547	-0.0125756	0.088069	-0.0779694	0.337936	-0.588279	-0.257345	0.317746	0.0144752	-0.0324299	-0.127436	0.154046	-0.0509485	-0.0383908	0.0559006	-0.0074496	-0.444248	0.284726	-0.124021	0.0529136	0.0597245	0.11025	-0.307945	-0.0636886	-0.116269	0.10034
-0.0949733	0.244637	-0.0642516	-0.479376	-0.107928	-0.0821508	-0.126477	-0.129938	-0.0739363	0.0663538	-0.210948	0.351765	-0.000826836	-0.0758767	0.154154	-0.234472	-0.135552	0.0939361	0.0913835	-0.418331	-0.0933376	-0.122956	-0.169987	-0.299481	0.231152	-0.235145	0.0349487	-0.150751	-0.0537744	0.200086	-0.373482	-0.0993016	0.0864974	0.340641	-0.113771	-0.0430981	-0.0405066	-0.283311	-0.0908627	-0.0964452	0.00606536	0.313822	-0.0189021	0.078348	-0.111398	-0.127185	-0.140371	-0.0836065	0.0600733	-0.131401
0.182127	0.0730789	-0.0696525	-0.285391	-0.121767	-0.11935	0.206122	-0.125504	0.215646	-0.0569312	-0.164107	-0.322991	0.0824603	-0.22594	0.0781073	-0.184816	0.129856	0.132818	0.00845785	0.100331	-0.11966	-0.109607	0.0290712	-0.198653	0.0446257	-0.0416874	-0.158391	-0.104358	-0.0578115	-0.503336	0.125955	-0.201336	-0.173937	-0.154884	-0.128797	0.0310905	-0.0481449	0.0519418	-0.120841	0.256434	0.0888302	0.277378	0.129145	-0.129347	0.0188114	0.0997431	0.166888	-0.0952366	-0.114162	0.0884615
0.320772	-0.336632	0.0315687	-0.359481	-0.085417	-0.358633	-0.116858	0.106313	0.0670567	0.070877	0.0751839	0.294573	-0.188839	-0.188514	-0.157141	0.0853683	0.247915	-0.344302	-0.3163	-0.348259	-0.115324	-0.0254457	-0.333236	0.258579	-0.146426	-0.0408012	-0.0830035	0.210016	-0.121583	0.896605	-0.0576604	-0.121438	-0.112547	-0.133823	-0.192681	0.161923	0.0813095	0.0658616	0.0085009	-0.0298365	0.0640992	0.253063	-0.24432	0.0886684	-0.183909	0.180277	0.318262	-0.08948	0.22278	-0.248355
-0.447991	0.00615445	0.134808	-0.458015	-0.0113915	0.171407	-0.0787899	-0.0998679	-0.112468	-0.143102	0.0992439	-0.104338	-0.254119	0.116718	0.0974738	0.304767	-0.280133	-0.010955	-0.0194224	0.518376	-0.109389	-0.0796194	0.370107	0.0944665	-0.143929	-0.0396435	-0.109485	-0.186828	-0.325544	-0.56023	0.0902167	-0.0150275	0.236587	-0.0692421	0.127931	0.176318	0.092039	-0.11097	-0.185222	-0.138562	0.0507749	-0.155427	0.0499512	0.119147	0.059283	-0.0278434	-0.0498345	-0.0823617	0.162798	-0.164644
-0.106835	0.276091	0.0142464	-0.54952	-0.163386	0.132846	0.0449218	-0.0860486	0.170473	0.00214475	-0.136483	0.331099	0.0806544	-0.177399	-0.154227	0.0630049	0.121308	0.161066	0.230813	-0.1162	0.349334	-0.0853268	-0.179747	0.140448	-0.144681	-0.176975	0.0184752	0.24702	-0.140155	0.270722	-0.121168	0.0104269	0.090346	0.242063	-0.1705	0.206106	0.059431	-0.365929	0.256613	-0.0565091	-0.0980551	0.332175	0.0635989	-0.0771948	0.0756533	-0.149439	0.131016	-0.0719159	0.142162	0.126106
0.336789	-0.177797	-0.147154	-0.543819	-0.0558129	0.0395293	-0.0411233	-0.140659	-0.150705	0.119485	-0.15991	-0.316318	-0.0710015	0.299554	-0.13435	-0.200638	0.268362	0.128563	-0.0141553	0.438456	-0.167885	-0.0908037	0.105522	0.22781	-0.107821	-0.0423864	-0.102726	-0.129695	-0.0875205	-0.500318	-0.00411389	-0.167197	-0.143619	-0.101019	-0.10752	0.0658594	-0.0493789	-0.0854719	-0.116409	0.227287	-0.486874	-0.114302	-0.202518	-0.236289	-0.00794494	-0.19142	0.211712	-0.0831389	-0.212931	0.0453897
0.23263	-0.29205	-0.160045	-0.264672	0.0511471	-0.130489	-0.0808045	0.140041	0.188351	0.160528	-0.133618	-0.249007	-0.242839	-0.200386	-0.22759	0.0108246	-0.00722957	-0.414267	-0.0247252	-0.311329	-0.0936074	-0.0858417	-0.0467722	0.209048	0.0304492	-0.0370114	0.100715	-0.0216103	-0.246214	-0.55766	-0.0722316	0.151373	0.0434318	-0.115949	0.0571865	-0.168655	0.109055	0.108689	-0.0528541	-0.17347	0.0372544	0.120059	-0.0269026	-0.0370538	-0.238923	-0.143636	-0.068644	-0.0799603	0.259923	0.0852477
0.182226	-0.228999	-0.0991155	0.174282	0.0142172	-0.317535	-0.127091	-0.0827968	-0.0118187	-0.182641	-0.0965527	-0.287045	-0.0100782	-0.207841	-0.231836	0.072933	-0.307633	-0.026333	-0.123617	-0.328387	0.0266957	0.248298	0.0842088	-0.0157194	-0.117071	-0.0226229	-0.142343	-0.339047	-0.0860889	-0.10894	0.14383	-0.170443	-0.0266526	-0.0727055	0.237254	-0.0917987	-0.0728768	-0.0366728	-0.0337794	-0.0521798	0.13322	-0.264243	0.12389	0.0463516	-0.0328334	-0.0754082	-0.0849993	0.285274	-0.141375	0.103205
0.155559	0.238547	0.250183	-0.556898	-0.161925	0.148736	-0.105566	-0.0883769	0.236437	0.121867	-0.192331	0.305973	-0.0547792	-0.257243	0.236574	0.112774	0.232356	0.169912	0.0709989	-0.42015	-0.117642	-0.110911	-0.323139	-0.209525	-0.0304696	-0.0785434	-0.0733504	-0.145818	-0.130337	-0.574275	-0.120444	0.0690305	0.0495042	-0.0932585	-0.140522	0.204782	0.0672939	-0.274062	-0.0143949	-0.00570186	0.0379448	0.0244076	0.435257	-0.0636129	-0.17046	-0.0325437	0.0297051	-0.0910405	-0.272024	0.113778
0.00769904	-0.363743	-0.0478569	-0.0385171	0.105838	-0.269787	-0.0831938	0.121327	0.0754612	-0.146775	-0.126476	-0.10958	0.334031	0.269326	-0.294821	0.217309	-0.146699	0.0423505	-0.145109	0.0706276	-0.127699	-0.0783346	0.306985	-0.090405	0.0123965	0.236202	0.113267	-0.165727	-0.367862	-0.423829	-0.0373621	-0.19697	0.0432609	-0.115675	0.258863	-0.393794	0.0814265	0.153469	0.0193639	-0.167613	0.0504126	-0.109114	-0.335885	0.0761278	0.0546238	-0.110933	0.0260846	0.0392943	0.279936	0.0858665
-0.417288	0.227294	-0.00117066	1.52701	0.305566	0.252511	-0.0819083	0.0693921	0.228219	0.192101	0.123277	0.295216	0.320954	0.174592	0.274591	0.332679	0.167348	0.194469	0.217964	0.548164	-0.0772588	-0.0597334	0.127235	-0.211897	0.188223	-0.0030475	0.11252	0.239492	0.278069	1.88166	0.136811	-0.0367123	0.187865	0.272739	0.204807	0.204806	0.0844184	0.333943	-0.0986226	-0.189624	-0.129511	0.211428	0.139169	-0.0146892	0.0722264	0.14271	-0.00434109	0.252229	-0.192946	0.167243
-0.439247	-0.049856	-0.178466	-0.477367	-0.166988	0.381806	-0.0926418	0.0745889	0.0252772	-0.0870194	0.094152	-0.216943	0.243211	0.29745	0.0760473	-0.185548	0.202935	0.066722	-0.0724653	-0.335749	-0.0930465	-0.100169	-0.165957	0.116985	-0.119664	-0.0481757	-0.0827054	-0.275398	-0.0185382	0.454387	0.167173	-0.155033	-0.00470895	-0.0670189	-0.114189	0.0168198	-0.0668875	0.251222	-0.152391	-0.0934964	0.110671	-0.292706	-0.00612	0.0930672	-0.262141	0.000584873	-0.0382271	0.0414723	0.102058	-0.185834
-0.371912	-0.166892	0.369386	-0.484338	0.00476527	-0.11756	0.29908	-0.110968	0.21353	0.177118	0.146241	0.0355037	-0.0253085	-0.239567	0.0554023	-0.205948	-0.293624	0.132471	-0.0689369	-0.0381106	0.0424602	-0.0214416	-0.191675	0.0442695	0.0196234	-0.057928	-0.124824	-0.0833056	-0.326604	-0.1345	-0.0710159	-0.226438	0.0087467	-0.0854395	0.262002	0.253025	-0.0404793	-0.317637	0.147131	-0.172059	0.0338035	0.0443509	0.101766	0.0980932	0.037943	0.0482695	-0.0290046	-0.0848096	0.0623958	0.163709
0.261204	-0.250135	0.202019	1.62281	-0.178074	-0.025047	-0.00732896	-0.11761	0.226476	-0.0433924	0.000364511	0.302671	0.109185	-0.116029	0.245123	0.291015	0.20871	0.090946	-0.293633	0.34829	-0.00155362	-0.0438022	-0.0561305	-0.0775255	0.168748	0.227455	0.0769103	0.171135	-0.107641	1.93095	0.103671	0.0479728	-0.151515	-0.113325	-0.175217	-0.413803	0.0466903	0.306903	0.232055	-0.0213107	0.117853	-0.0895396	0.129115	0.104932	-0.215271	-0.0788019	0.364361	0.273293	0.47008	0.09229
0.164407	0.0480927	-0.0790414	-0.397138	-0.120961	-0.122127	-0.070687	-0.103583	-0.272881	0.14451	-0.166222	-0.167384	-0.197796	-0.206637	-0.135941	-0.208515	0.205735	0.12636	0.217323	-0.361738	-0.0887086	0.00558586	-0.368798	-0.291108	-0.101444	-0.0281965	-0.107786	0.205473	0.187627	-0.505338	-0.0744282	0.175247	-0.156807	-0.0576824	-0.0947435	0.134968	-0.00563286	-0.277768	0.197877	-0.0162634	-0.353082	-0.118444	0.0901632	-0.0911062	0.042572	0.0455745	-0.353166	-0.0667416	-0.0757042	0.0782575
0.0726541	-0.329172	-0.208629	-0.456232	-0.138249	-0.109675	0.0294889	0.108999	-0.0564799	-0.141332	0.0941017	-0.256389	0.041385	-0.21915	-0.206382	0.0264906	-0.213162	0.118117	-0.114234	-0.21801	0.0855759	0.274113	-0.268676	0.145373	-0.124558	-0.051116	-0.104062	-0.136218	-0.324727	-0.616077	-0.240339	-0.206507	-0.000957075	-0.144438	-0.143829	-0.0769455	-0.072803	-0.0641099	-0.178851	-0.0316137	0.0728482	-0.220992	-0.32184	0.0634626	-0.0128778	-0.149371	-0.0691071	-0.0697058	-0.156102	0.0907161
-0.311255	-0.182995	0.274252	-0.490101	-0.132968	-0.141005	-0.0602283	-0.0862793	-0.220294	-0.0464374	0.0781679	-0.11358	0.468787	-0.201342	-0.197453	-0.0957874	-0.359693	0.0908071	0.0103063	-0.365531	0.034416	0.315182	-0.239786	-0.0279142	-0.109422	-0.00641404	0.0982014	-0.281142	-0.31297	-0.365925	0.159956	0.179405	0.0138939	-0.108658	0.0973833	-0.101788	0.044715	-0.173379	-0.0306265	-0.0469996	0.0307331	-0.0729663	0.115445	0.120383	0.0862875	0.0914557	-0.296973	-0.0782496	-0.163647	0.0896273
-0.130077	0.00553964	0.257949	-0.492407	-0.00932007	-0.0889905	-0.0981812	-0.0461739	0.015893	-0.0980526	0.109565	0.299115	-0.0711281	-0.263734	0.0304971	-0.217307	0.178079	0.122819	-0.00796615	-0.37535	-0.116179	0.251987	-0.0993168	0.129725	-0.115273	0.242042	-0.0741186	0.240409	-0.336745	-0.497045	0.0189871	0.0819024	-0.0891557	-0.0924631	-0.00246638	0.174305	-0.0871178	0.115636	0.000995815	0.230888	0.128156	-0.107089	0.16086	0.108521	-0.0162511	-0.16795	-0.0364839	-0.0744401	-0.115217	-0.245912
0.312436	0.0584142	0.231973	1.59903	0.290713	-0.314678	0.133139	0.108126	0.181288	-0.101975	-0.131004	-0.274623	-0.0617063	-0.109751	-0.179301	0.16118	0.193472	0.169614	-0.386121	0.182673	-0.0811003	0.148663	0.346359	0.241693	0.282185	0.224098	0.156819	0.27095	-0.031805	0.387471	0.095264	-0.00948535	0.151062	-0.0888825	0.183495	-0.101516	0.0815437	0.289853	0.221071	0.0924808	-0.0626552	-0.106202	-0.164463	-0.0341744	0.0425996	0.154643	0.177029	0.259761	0.207086	-0.210984
0.144135	-0.169445	0.140233	-0.498004	0.0228047	-0.370757	0.176635	-0.131308	0.250833	0.126872	-0.139782	0.298518	-0.0757146	-0.224863	0.13377	-0.297928	0.245664	-0.0110006	0.109289	-0.361026	-0.0158308	-0.121962	-0.206963	0.109666	0.0388094	-0.034628	-0.168064	0.221971	-0.167728	0.470234	0.131715	0.0646358	0.0579832	-0.117326	-0.128256	0.0564044	0.0831997	-0.114355	0.21839	0.186416	0.147259	0.0140957	0.0447913	0.130512	0.00659033	-0.0626328	0.113889	-0.0935434	-0.0371035	0.1263
-0.117944	0.267984	0.0307067	1.63516	-0.0523108	-0.0821682	0.199961	-0.0228616	0.264763	0.254629	0.125069	0.263891	0.305907	0.278081	-0.20359	0.376621	-0.0805874	0.0749266	0.195528	0.155047	0.320715	0.0317585	0.0651126	-0.224796	0.0060847	-0.00862174	-0.137835	0.283134	0.247121	1.56246	0.141264	-0.179364	-0.0989028	-0.0979521	0.23862	0.293807	0.0726805	0.027724	-0.0612904	-0.0482563	0.0143309	-0.0807058	0.06881	0.0844804	0.0222963	0.172853	-0.0353898	0.221724	-0.0541672	0.164909
-0.276569	-0.208416	0.198355	-0.366231	-0.0119144	-0.294156	-0.0765825	-0.155355	-0.0829124	-0.161246	-0.00358452	0.0635485	0.0340757	0.227448	-0.224488	-0.200394	-0.357446	-0.404978	-0.0815404	0.203174	-0.164282	-0.0683405	-0.11718	-0.0681321	-0.0428651	0.0791976	0.123087	-0.133418	0.158022	-0.602717	-0.0469022	-0.141969	0.182477	-0.142218	0.166552	0.195337	-0.0886187	-0.257263	-0.161932	0.140704	-0.36566	-0.192241	-0.232967	0.00676436	-0.0601409	0.0854189	0.186144	-0.076194	0.218896	-0.218314
-0.191183	0.103358	-0.025869	-0.0787949	-0.139306	0.158929	-0.0789563	0.10651	0.103221	-0.331217	-0.0373194	-0.00307875	-0.194821	0.206825	-0.183618	-0.191679	-0.344312	0.100904	-0.0895434	0.559978	-0.0848929	-0.0909232	0.148605	-0.00365956	0.0542564	-0.230875	-0.123234	-0.205611	-0.0905301	-0.374596	-0.0702191	-0.0630018	0.0649836	-0.102872	-0.0722863	0.0273626	-0.0873464	0.0567045	-0.172855	-0.0721239	-0.396032	-0.1764	-0.22482	-0.101514	-0.0197217	-0.164063	-0.372114	0.0283624	-0.218709	-0.217557
0.158901	0.0832457	0.262661	-0.53349	0.0625263	-0.0803019	-0.111324	-0.109416	0.14227	0.104872	-0.203672	0.0681591	-0.0248939	-0.217981	0.127632	-0.244151	0.3171	0.103051	0.300344	-0.39059	-0.00868663	-0.0845655	0.100396	-0.0318438	-0.149622	-0.178902	-0.0746051	-0.11737	-0.0619933	0.465398	-0.085287	-0.0630904	-0.136145	-0.128988	0.0680421	0.163586	0.0930179	0.0330963	-0.185716	-0.142096	0.126538	0.354196	0.426047	-0.076579	-0.199034	-0.141982	0.0864314	-0.0955173	-0.207552	0.137948
0.0226069	0.211364	-0.084192	-0.52477	-0.12307	0.360131	0.179971	-0.104459	0.206433	0.106543	-0.151036	0.304832	-0.288972	-0.161883	0.270291	0.277834	0.249636	0.144886	0.216313	-0.340446	0.0160176	0.319294	0.111662	0.000749361	-0.114507	-0.197579	-0.0709215	0.270679	0.462011	-0.326256	-0.0628615	-0.0876967	-0.172762	-0.0758888	-0.227983	0.205612	0.0729133	0.244562	-0.153736	-0.168185	0.143974	0.317187	0.0814467	-0.321641	0.0252276	-0.142834	-0.276314	-0.0651405	-0.112009	0.132016
-0.403065	0.049561	0.152629	-0.463672	0.25883	-0.0960305	0.0305284	-0.129254	0.202414	-0.182931	0.100651	0.0047999	-0.0425558	0.244095	0.18507	-0.218571	-0.29376	-0.132836	0.24186	0.0802387	-0.00481825	-0.0916759	0.155738	-0.124448	0.16765	-0.0493507	0.0698204	-0.0942228	-0.0397791	-0.612669	0.103635	-0.153076	-0.0937146	0.10306	-0.0644987	0.158601	0.118592	-0.253999	0.224734	-0.0633265	-0.446905	-0.0891118	-0.0783818	-0.101993	-0.176455	0.0914157	-0.385161	0.0581036	-0.11563	-0.266301
0.249059	-0.0241224	-0.0867474	-0.527166	-0.135076	-0.091124	-0.0186625	0.133865	0.203539	-0.0860161	-0.0444431	0.276903	0.0541297	-0.198056	0.0355783	-0.0712168	0.209076	0.142891	0.0138313	-0.0137416	-0.138882	0.0948936	-0.108019	0.280795	-0.157094	-0.119281	-0.0654766	-0.149768	-0.220902	-0.49367	-0.0592259	0.133533	0.0773932	-0.102708	-0.12052	0.111104	-0.0525793	-0.266403	-0.182613	-0.207977	0.100691	0.374461	0.0893015	0.0672529	0.0184659	0.0681388	0.136069	0.0439721	-0.171102	-0.266705
-0.345026	0.182949	-0.162235	-0.467441	-0.115538	-0.265863	-0.0594637	0.0725578	0.128889	-0.287506	0.0624819	-0.30831	0.0391773	0.209315	0.00235905	-0.0619163	-0.368664	-0.0401864	-0.371285	0.530326	0.0102184	0.333926	0.153262	0.115144	0.336512	-0.0257305	-0.0949497	-0.155351	-0.286697	-0.475219	0.0683602	0.0266937	0.0369822	-0.106581	-0.120575	-0.216386	0.0377881	-0.0429427	-0.163771	-0.138525	0.124816	-0.137799	0.0816396	-0.0798027	-0.216377	0.21996	-0.334638	-0.0760534	-0.135201	-0.224776
-0.40323	0.043821	0.166901	-0.462059	-0.0981789	-0.0523822	0.150852	0.111017	-0.259197	-0.113622	-0.0784654	0.0602004	-0.0878675	0.110438	0.203328	0.0882444	0.219716	0.108208	0.0136324	0.0602739	0.0721313	-0.105163	-0.157215	0.00466826	0.288194	0.0131717	-0.0738711	-0.150132	-0.322667	-0.548613	0.0667725	0.0492247	0.222234	-0.131244	-0.00915815	-0.0719246	0.0675897	0.336326	0.180152	-0.0683899	-0.212083	0.24386	-0.180996	0.111948	0.0370887	0.047411	0.170161	-0.0815387	-0.114596	-0.199756
0.275179	0.273772	-0.0990996	-0.348818	-0.129372	-0.1248	-0.0909234	-0.163604	-0.209428	-0.149958	-0.165977	-0.040988	0.0268312	0.260586	0.122506	0.0987246	0.247155	0.137477	-0.0566963	-0.0821762	-0.164731	0.057293	0.066188	-0.275722	0.299721	0.0151929	-0.124541	-0.153819	-0.369135	-0.342626	-0.101739	-0.16737	-0.070347	-0.0684409	0.20509	0.10887	-0.05804	-0.281084	-0.168199	-0.203526	-0.462463	-0.187384	-0.0747204	-0.269731	0.0257703	-0.189572	-0.371238	-0.0961354	-0.159168	0.0395554
-0.440419	-0.176949	0.268954	-0.433394	-0.000697514	-0.271259	-0.110576	0.145321	-0.306105	-0.149771	-0.138931	-0.132256	0.0297806	0.277524	0.061408	0.235146	0.229186	0.153902	-0.0536939	-0.013915	0.0434433	-0.101128	-0.292375	-0.221449	-0.0105941	-0.100251	-0.099374	0.224792	-0.176556	-0.573432	-0.286392	-0.195177	-0.131312	0.102475	0.174236	-0.241718	-0.0202901	-0.0313583	-0.133577	-0.0776461	0.010949	-0.0655935	0.211061	-0.17898	0.105068	0.072567	-0.177499	-0.0834615	0.442582	0.08073
0.0776524	0.208398	0.0276793	1.49565	0.228967	0.244399	0.0314606	0.106277	0.221707	-0.226154	0.128519	0.334187	0.32609	0.245519	0.0419976	0.325127	0.118896	0.0423988	-0.0456975	0.560027	-0.0890584	-0.0472453	0.286942	0.129627	0.116086	-0.0581413	0.142999	0.28342	-0.0222692	1.82223	0.155461	0.0413429	0.15343	0.196405	-0.0610554	0.253732	0.0827107	0.270468	-0.112267	0.159311	0.15156	-0.101143	0.165753	0.118894	0.0636374	0.182803	0.182854	0.259525	0.136991	0.127676
0.320416	-0.014995	0.247016	-0.467003	-0.129442	-0.10282	-0.0972761	0.141789	0.1382	0.0926303	-0.0368599	0.0984498	-0.0560409	-0.280584	0.0470294	-0.220584	0.00443154	-0.0183368	0.120744	-0.412772	-0.154966	-0.0982335	-0.122749	0.156059	-0.158186	-0.0557709	-0.0157665	-0.171224	-0.244417	-0.609475	-0.0737423	-0.187681	-0.0893093	-0.0710378	0.0123707	0.0606969	-0.0791207	-0.110293	-0.0985041	-0.165057	0.0720159	-0.100705	0.416773	0.137787	0.0407237	0.0312265	0.178495	-0.0900492	-0.138825	-0.183513
-0.386979	0.0419932	-0.18967	-0.489833	-0.0896102	-0.0969355	-0.0596472	0.0800128	-0.0909792	-0.13279	-0.0131351	-0.173068	0.0433571	0.18834	-0.214342	-0.220735	-0.386531	0.116257	0.186569	0.291857	-0.113217	-0.00321473	0.163827	0.141565	0.0254546	-0.0593329	-0.0713212	-0.200871	-0.0298434	-0.181175	-0.0137454	0.0852163	-0.0971674	-0.090372	0.0126364	0.11626	-0.081903	-0.312725	-0.126984	-0.0270293	0.110459	0.212494	0.268698	-0.293201	-0.226355	-0.171018	-0.440936	-0.0740215	0.19276	-0.233521
-0.44664	-0.297028	-0.200448	-0.385857	-0.0148874	-0.24816	0.202749	0.103488	0.258888	-0.229415	0.111035	-0.306465	-0.0604086	0.258624	0.0622641	0.236489	-0.164363	-0.0331453	0.0439471	0.537564	-0.109755	-0.0987416	-0.224107	-0.128837	0.221143	0.209308	0.0914878	0.236974	-0.187129	-0.529219	0.103547	-0.153817	0.0754134	-0.129561	0.0258447	0.242177	0.018679	-0.240383	-0.0441268	0.165913	-0.365653	-0.0618147	-0.0682914	0.133891	-0.180732	0.100447	0.398686	0.0597449	-0.184076	-0.253093
0.160803	-0.285491	0.32914	-0.503972	0.243435	-0.383282	-0.11663	0.106571	0.192116	-0.00394421	0.07478	-0.253891	0.251124	-0.190528	-0.139069	0.0698735	-0.181789	-0.329707	-0.13867	-0.280392	0.0170949	0.223557	-0.176427	-0.0360734	0.0740921	-0.196624	0.136608	-0.283971	-0.277649	0.32009	-0.0437822	-0.0756436	0.0137226	-0.141297	-0.149386	-0.10244	-0.029672	0.02786	-0.160039	-0.0467675	0.0694818	-0.0691678	-0.0754304	0.10735	-0.268643	-0.1838	-0.0737906	-0.0843889	-0.0619203	-0.236221
0.293122	0.18991	-0.0777164	-0.35005	-0.137791	-0.133726	0.156636	-0.129037	-0.305972	-0.126471	-0.0998174	-0.241229	0.0865174	0.293243	0.0872674	0.116803	0.209436	0.12093	0.204626	-0.252844	-0.128938	-0.0991857	-0.248519	0.0699846	-0.0488388	-0.0209233	-0.106711	-0.111962	0.166785	-0.632332	0.133121	-0.138691	-0.108557	0.367743	-0.0533751	0.0828801	-0.0708341	-0.365245	-0.121565	-0.0642444	-0.539581	0.198223	0.0842678	-0.0740322	0.0504629	0.0438302	-0.141391	-0.0654356	0.230383	0.0940652
0.249731	-0.0368372	0.333598	-0.481134	-0.129825	0.3983	-0.0920415	0.122905	-0.142077	-0.0140406	-0.00831156	-0.352339	0.314096	0.290712	0.183027	-0.105805	-0.126126	-0.415449	-0.158046	0.00321356	0.0490343	-0.0825504	0.124656	-0.194475	-0.130779	0.306783	0.0645786	-0.132611	0.26769	-0.116713	0.0892589	0.294192	0.0822456	-0.127371	-0.0943558	-0.229534	-0.0234682	-0.21431	-0.0762155	0.0793508	0.0503595	0.0551283	-0.209237	0.138282	0.0192705	0.0390597	0.178389	0.0516353	-0.143255	0.0557721
-0.183472	0.254367	-0.199886	0.652873	-0.138503	0.240364	-0.0656769	-0.0905262	-0.139781	-0.309347	0.114201	0.194754	-0.0265861	-0.184688	0.146885	-0.205099	-0.183722	0.115103	0.210954	0.667509	0.248334	-0.0867549	0.0390075	0.165398	-0.0863383	-0.0660896	-0.0927602	-0.0900168	-0.114638	-0.614632	0.0122159	-0.189708	0.0130185	-0.0549293	-0.0853632	0.171472	-0.0403477	-0.330856	-0.0446092	-0.0881545	-0.413956	0.0405886	0.10183	0.0619815	-0.137297	0.0553843	-0.0431717	0.333367	-0.13215	-0.199243
0.150791	-0.18774	-0.221041	-0.507485	-0.14331	0.0944954	-0.1164	0.11386	-0.139495	0.129542	-0.122226	-0.122753	-0.0319859	0.186276	-0.196069	0.0601123	0.145005	0.121456	-0.27895	-0.297102	-0.025871	-0.0200819	0.126074	-0.273599	-0.0358064	0.0606909	-0.108477	0.274967	-0.319299	-0.59946	-0.0394871	-0.00517656	-0.0595668	-0.136828	-0.0324805	0.079974	-0.0877191	0.148545	-0.0259677	-0.202516	0.0827459	-0.158665	0.052529	0.0862197	-0.261226	0.0333793	-0.0792281	-0.0792433	0.300869	0.0783857
0.185975	0.101627	-0.0950963	-0.360475	-0.134603	-0.290604	-0.0961187	-0.14894	-0.35387	-0.307161	-0.150262	-0.343298	0.0572135	-0.105978	-0.19876	0.220199	-0.284327	-0.376008	-0.0902908	0.0908619	-0.0581892	-0.0819425	0.157477	0.111085	0.0206274	0.0305352	0.139728	0.356333	-0.057813	-0.569382	0.0859065	-0.239861	0.0444841	-0.105846	-0.0970177	0.215926	-0.0658947	0.16099	-0.0923035	-0.0427574	-0.149744	-0.274274	0.0912783	0.10837	0.0604878	-0.0666585	-0.203298	-0.0786609	0.0823613	0.0939959
-0.395346	-0.158855	0.335984	0.496921	-0.0862944	0.126828	-0.0832937	-0.101523	-0.233586	-0.264937	-0.138473	-0.294772	-0.0173165	-0.165222	0.00934408	-0.00876961	0.252457	-0.336185	-0.0638688	0.0924123	-0.112667	0.359203	-0.285897	-0.215124	0.142284	-0.0447623	-0.0851355	-0.129823	-0.216379	-0.473018	0.0553195	0.016878	-0.0958358	-0.116259	0.00391548	-0.300997	-0.0437374	0.0480473	0.0653722	-0.0462951	0.117725	-0.194593	-0.282992	-0.108545	-0.161524	0.058292	-0.297457	0.037263	0.268601	0.0816255
0.22856	0.269888	0.286833	-0.429072	0.0569748	0.35951	0.15781	-0.0709416	-0.302387	-0.287993	-0.148757	-0.1611	-0.0562778	-0.198475	-0.122568	0.304459	0.117715	0.104163	0.0418788	0.128028	0.146354	-0.0721385	0.139784	0.221309	-0.00725616	-0.0172743	-0.13252	0.199492	0.430605	-0.0125345	-0.0518359	0.351083	0.0607909	0.284034	0.187585	0.101509	-0.0781211	-0.397881	0.0253684	-0.188569	0.0962775	0.0487498	0.131285	-0.0753782	0.0227779	0.0012374	0.142078	-0.0741141	-0.198966	0.116268
-0.114935	0.0453629	0.00967462	0.260041	-0.107096	-0.35127	-0.0801703	0.0122803	0.0597734	0.0131007	0.0914826	-0.329015	0.261053	0.001318	-0.202881	0.0582974	-0.317741	-0.0239914	-0.185706	0.167305	0.0284847	-0.0369047	0.0497938	0.13372	0.276126	-0.207484	-0.11518	-0.0493681	-0.281691	-0.38498	-0.296475	-0.136135	0.0484572	-0.0310728	0.180141	-0.174192	-0.0217173	0.210474	-0.198045	0.206481	0.0413186	-0.27584	0.00147427	0.0939055	-0.265503	-0.110648	0.366911	0.0446663	0.288866	-0.223961
0.192817	0.17715	0.275269	1.63221	0.282825	0.278714	0.167176	0.0755587	0.232756	0.128938	0.13685	0.238886	-0.340347	-0.145586	0.244667	0.142303	0.170493	0.184561	0.259803	-0.344124	0.143029	-0.0633268	0.13239	-0.0445634	0.00384236	-0.20586	0.123905	0.256961	0.334533	0.882359	0.110646	0.279773	-0.0830025	0.302561	-0.101105	0.226926	0.0102981	-0.0507587	-0.105894	-0.208916	0.115493	0.104144	0.125213	-0.0840676	0.0558519	0.0530558	-0.0636044	0.0256177	-0.224075	0.151627
-0.28749	0.262893	-0.130229	-0.48162	-0.106843	-0.084284	0.186359	0.024052	-0.0172845	0.175607	-0.166152	0.114181	-0.326441	-0.128613	0.133148	0.111262	0.260119	-0.447208	0.176897	-0.315646	-0.0601611	-0.117425	0.165037	-0.00379703	-0.0947201	-0.229103	-0.0672159	-0.349374	0.334924	-0.290442	-0.0564747	0.277555	-0.125933	0.354999	0.170413	0.0947862	-0.0817539	-0.299139	0.00243425	0.18701	0.139997	0.263783	0.142605	0.0723386	0.034824	0.216095	-0.228783	-0.0708638	-0.0915279	0.128743
-0.45507	-0.0153192	-0.0343931	-0.461118	0.23941	-0.365338	0.0387474	-0.0300944	0.168832	0.131324	0.0815611	-0.256566	-0.106103	-0.0907677	0.093603	0.0524247	0.0229691	0.0250319	-0.181848	-0.320535	-0.102929	-0.00149611	0.11563	-0.0111324	0.236471	0.0914987	0.119316	-0.0470233	0.204762	-0.211738	0.118972	-0.110945	-0.101448	-0.0415596	-0.00130195	-0.0368295	-0.0819343	-0.0031195	-0.104949	0.167982	0.0844617	0.186317	-0.0612054	0.091536	0.0380196	-0.143099	-0.16009	0.0238641	0.237386	-0.333786
0.169041	0.135	-0.0472131	-0.536978	0.298137	0.227711	0.209822	-0.100131	0.185267	0.114404	-0.0836483	0.309916	-0.128211	-0.213159	-0.00830949	0.316946	0.257562	0.17821	0.0113985	-0.372251	-0.107496	0.262806	0.182064	-0.00418107	-0.117302	-0.0238358	-0.0933607	0.386163	0.337752	-0.308873	0.141252	0.159392	0.0415053	-0.0608919	0.240978	0.10262	-0.0586743	0.147445	0.205374	-0.0393795	0.125076	0.318897	0.0513949	-0.315245	0.020353	-0.0816906	-0.0299278	-0.0673888	-0.196016	0.162537
0.31359	-0.223816	0.406809	-0.317116	-0.0892563	-0.0944365	-0.0838659	0.132281	0.320124	-0.285285	0.0297265	0.333162	0.400034	-0.113772	0.0957941	0.273341	0.299214	-0.00877206	0.00863042	0.190833	0.0690653	-0.0513205	-0.0801652	0.271713	0.050811	0.0172836	-0.124239	0.204337	-0.0563448	-0.534362	0.124657	0.136665	0.0798918	0.427681	-0.154877	-0.0932086	0.0482521	0.0423214	0.280133	-0.0522018	0.116665	0.180681	-0.3413	0.127065	0.110719	-0.0825546	-0.0666834	-0.0685816	0.526401	0.100083
0.037227	0.269965	0.252741	-0.448456	-0.180593	0.112569	-0.101261	-0.0913407	-0.162067	-0.0464111	0.0935565	-0.224308	0.0363835	-0.10672	-0.211147	-0.171598	-0.279446	0.102993	-0.13263	0.216975	-0.109432	-0.106424	0.0447917	0.0547195	-0.0884996	-0.0357164	-0.127831	-0.149501	-0.112958	-0.604164	0.0204873	-0.203013	0.00629865	-0.14383	-0.0224648	-0.335833	0.0693579	-0.0148015	-0.0778986	-0.192038	0.117499	-0.283851	-0.0892901	0.110934	0.0386802	-0.163998	-0.240137	-0.0841399	-0.282393	0.0962576
-0.0483113	-0.28587	-0.156962	-0.479298	-0.0999611	-0.264572	-0.036051	-0.099013	0.0113948	-0.129625	0.097097	0.379102	-0.318671	-0.22574	-0.17977	0.0532193	0.228666	-0.0101703	-0.0496455	0.315853	0.347675	0.285887	-0.274558	-0.178447	0.317557	-0.0293573	-0.117636	-0.0744548	-0.0610698	-0.523203	0.0943208	-0.100203	-0.134472	-0.146895	-0.0967481	0.172584	-0.0403191	-0.185623	0.240551	0.21622	-0.0160746	0.0211853	-0.142947	0.094649	-0.19061	0.0254977	0.197261	-0.0871199	0.333265	0.0737807
0.17797	0.105089	-0.0580967	-0.449586	-0.0516446	0.0411622	0.161575	-0.00227468	-0.0367311	0.156252	-0.147854	-0.119957	0.0498834	0.209197	-0.171749	-0.0316151	0.260579	0.211706	0.202632	0.086691	0.0371383	-0.0753692	-0.00643635	-0.21261	0.150762	-0.0183629	-0.131321	-0.292259	-0.0713344	-0.590866	0.0235388	-0.135301	-0.173018	-0.0708236	-0.0610782	0.059306	-0.0441237	0.182019	-0.00603671	-0.199009	0.147221	0.206677	0.14098	-0.0408351	-0.0241949	0.0476756	0.211591	-0.0821777	0.313595	0.0720947
-0.366674	-0.140425	-0.173667	0.153504	0.0712132	0.217034	-0.0471557	0.0816995	0.106185	0.14118	0.146888	0.190009	-0.0451694	-0.132913	0.252659	0.0984705	-0.07816	0.164158	-0.172912	0.0981703	-0.0906491	-0.059313	-0.239549	-0.238723	-0.110266	-0.0162431	-0.0736265	0.236018	-0.0327143	-0.450583	0.120153	-0.210331	0.044255	-0.0460822	0.183864	-0.138163	0.0220829	-0.200168	0.122042	-0.130723	0.0817881	0.217836	0.0795564	0.102371	0.0368301	-0.138865	0.38083	0.0287607	0.277667	0.0937766
-0.450443	-0.032255	-0.0505005	-0.236875	-0.0635727	-0.302422	-0.077966	0.0341457	-0.225629	-0.366557	0.111186	-0.253362	0.0463528	0.182104	-0.230983	-0.169523	-0.353916	0.0861807	-0.0667325	-0.285363	-0.0137831	-0.113061	-0.277665	-0.126946	-0.0383685	0.0157925	0.0842332	0.277631	-0.307336	-0.377981	0.0996657	-0.0913889	0.0191651	-0.0768973	0.270538	-0.352457	0.0679147	0.0687165	0.322212	0.0947358	0.0555644	-0.103714	-0.278736	0.101264	-0.24133	-0.126706	-0.323078	0.335202	-0.0552834	0.116609
-0.212022	0.1083	-0.0787288	-0.505495	0.308468	0.359526	-0.101839	0.0757602	-0.0350211	-0.134332	0.0660521	0.130783	-0.00501346	-0.110734	-0.198968	0.0558211	-0.287266	0.0249986	-0.0341574	0.499104	0.253507	-0.0694485	-0.16938	-0.081944	-0.10882	-0.0324144	-0.0808984	-0.368389	0.194812	-0.33768	-0.032787	-0.156915	-0.0705753	-0.141266	-0.110336	0.0865993	-0.0453952	-0.285364	-0.105315	-0.181203	0.0458756	0.16671	0.0815908	0.0946823	-0.0100138	-0.170318	-0.187753	-0.0545114	0.228495	-0.273066
-0.1905	-0.18997	-0.0655191	-0.175779	0.321919	-0.162157	-0.0458829	-0.129863	-0.105028	0.111464	-0.142121	0.087271	0.422901	-0.241784	0.06815	0.327674	-0.10624	0.218873	0.213829	-0.215156	-0.102945	-0.0212312	-0.0319688	-0.239853	-0.158694	-0.00966516	0.109534	0.134976	0.265251	-0.504434	-0.0923241	0.140652	-0.137507	-0.111879	-0.0847456	0.115332	-0.120788	-0.0836194	0.276916	0.222248	0.112497	0.15996	0.114844	0.0768938	0.0909767	0.0178023	-0.0275396	-0.0713565	0.263516	0.118463
-0.442262	-0.101972	0.198495	-0.485621	-0.153606	0.196331	0.211453	0.0867599	-0.133481	-0.306138	0.102	0.0863664	0.316105	0.16517	-0.223489	0.290992	-0.313584	0.134488	0.186635	-0.0219092	0.00379349	-0.0673811	0.0768866	-0.223279	-0.0456311	0.0464046	0.0957919	-0.185814	-0.260367	-0.327916	0.1434	-0.163494	-0.11789	-0.0374414	-0.12053	0.0229264	0.0199534	-0.265689	-0.0591619	0.239102	0.0937197	-0.200268	0.108078	0.145395	0.0733353	-0.0298846	0.339257	-0.0691745	0.320996	0.0968533
-0.264071	-0.184766	-0.0366414	-0.328946	-0.118211	-0.290553	0.266513	-0.0912912	-0.172794	0.166745	0.0958017	-0.136115	-0.042746	-0.0970632	-0.188775	0.114302	0.0238867	-0.442125	0.203201	-0.073552	-0.0187091	-0.0732799	-0.29944	-0.278768	0.022043	-0.189497	-0.131714	0.251371	-0.197137	1.57031	-0.302581	0.00903887	0.0367844	-0.0770053	0.196924	-0.1346	0.0237335	0.113835	-0.0989928	0.204055	0.115272	0.389256	0.155406	0.054313	0.0173858	0.0745463	-0.0938592	-0.0771639	-0.0423455	0.0901601
0.238055	0.040471	-0.143608	0.0243298	-0.140348	0.401326	0.114391	0.0949276	0.0212024	-0.134684	-0.210728	-0.13348	-0.335902	0.175833	0.242653	0.271568	0.217243	0.118181	0.173301	0.457839	-0.0539437	-0.0855153	0.176971	0.168275	0.0290432	-0.179844	-0.112983	-0.322077	0.234096	-0.332742	0.139668	-0.199179	0.169271	0.148304	-0.0910765	0.251756	-0.0288307	-0.0410322	-0.138308	-0.0773692	-0.444461	-0.288589	0.361722	-0.274017	0.0367427	0.0924336	-0.138708	0.259474	-0.13883	0.114759
-0.240171	-0.22327	-0.184102	-0.323548	-0.126082	-0.137361	-0.105844	0.0877126	-0.108057	0.162448	0.133006	0.34277	-0.0829304	-0.201847	0.085222	0.24993	0.220545	-0.0517398	-0.00692741	0.0560363	0.243257	-0.0940782	-0.333527	-0.229013	-0.000824096	-0.0202775	0.0591465	-0.156031	0.361902	-0.399262	-0.0222223	-0.16521	-0.103552	-0.0800355	-0.156049	0.179076	-0.0293761	-0.362825	0.20372	-0.064558	0.048135	0.0557661	0.370096	-0.16656	0.0591835	0.0563599	-0.0121104	-0.0511723	0.242519	0.0545259
0.183638	-0.272904	-0.0564257	-0.413077	0.275245	-0.0806577	-0.0486754	-0.00300375	-0.212936	-0.0133128	0.0938248	-0.212163	0.337458	-0.197109	-0.190024	-0.137445	0.166414	-0.0215758	-0.0384016	-0.320555	-0.044848	-0.0629944	-0.294828	0.282637	-0.142553	0.038418	-0.00887022	-0.0947377	-0.279752	1.27092	0.174442	-0.157472	0.140227	-0.148427	-0.15944	-0.198579	-0.00341451	0.163654	0.258671	-0.0441055	0.12134	-0.104558	-0.403993	0.0804099	0.0241057	-0.126842	0.176828	0.0611081	-0.254736	-0.232419
-0.152661	-0.195619	-0.174238	-0.398552	0.0150466	-0.121409	0.172767	-0.0318331	-0.140449	-0.155859	0.10596	-0.0118384	0.0689806	-0.113264	0.074141	-0.241156	-0.136134	-0.0727737	-0.182759	-0.247255	-0.0951184	-0.0816738	-0.115275	0.223247	-0.152028	0.332275	-0.083898	0.182941	-0.369054	-0.336209	0.197923	0.0536853	0.00992643	-0.152002	0.0144935	-0.25521	0.0426585	-0.210034	-0.1515	0.272261	0.125194	-0.122754	0.0637076	0.154974	0.0748482	0.0533917	-0.0501847	-0.0735796	0.0250769	-0.285247
0.217732	0.203039	0.305395	-0.538877	-0.103358	0.333698	0.151197	-0.0840421	-0.25116	0.147077	-0.202942	0.0702412	-0.012315	-0.191561	0.216643	-0.107728	0.190735	-0.0176302	0.265509	-0.27335	0.158882	-0.12195	-0.308759	-0.279631	-0.0831617	-0.136001	-0.0555072	-0.290001	-0.0671911	-0.313286	-0.375693	0.27174	-0.150344	0.345351	0.0910196	0.116064	-0.0646059	-0.245925	0.183697	-0.0276035	0.109315	0.0380912	0.371831	-0.277729	0.0351366	0.0683815	-0.227877	-0.0803067	-0.201839	0.0915744
0.238809	0.0428232	-0.200646	-0.507332	-0.125712	-0.0746434	0.15236	-0.0288808	-0.00210185	-0.142067	-0.130578	0.311384	0.088619	0.225742	0.217086	0.101753	0.222732	0.045852	0.170032	-0.168235	-0.0905326	-0.112943	0.124262	0.269679	-0.0631277	-0.0666278	0.0254106	0.206735	-0.0460369	-0.637032	0.12457	-0.165247	0.191832	-0.043443	-0.0781477	0.0105327	0.0299724	-0.3122	0.18122	-0.0805529	0.0799877	-0.082461	0.338321	0.115204	0.0850368	-0.0333934	-0.0971081	-0.0806162	-0.364097	-0.216158
0.199362	0.0765262	0.182398	0.0783603	-0.0311905	-0.0846796	-0.0955701	-0.129106	0.060387	0.157019	-0.0255162	-0.273848	0.0738924	-0.0899812	-0.189038	0.0424371	-0.093971	0.183469	0.203134	0.0807737	-0.104495	0.219782	-0.270439	0.0224932	0.0746125	-0.0109069	-0.120907	-0.162673	-0.0447982	0.365442	0.114968	0.132113	0.192499	-0.0782488	-0.115109	0.142726	-0.0546649	-0.036453	-0.136156	0.174057	-0.394691	-0.217538	-0.222418	0.126595	0.0537025	0.11993	0.0443016	0.0571969	-0.127755	-0.160887
-0.559111	0.0295108	-0.145226	-0.393909	0.00605587	-0.324518	0.00933518	0.137286	-0.261992	-0.142352	0.0853512	-0.115937	-0.105559	0.380306	-0.243005	0.0484763	0.140734	0.0647821	-0.0257152	0.0982625	0.0328631	-0.12108	-0.223248	-0.166337	0.0180048	0.0215145	-0.138976	-0.148456	-0.277471	-0.340542	-0.250495	-0.195149	0.0189247	-0.108482	0.00410667	-0.367378	0.0566104	0.297119	-0.142315	-0.0466983	0.0126996	-0.163718	-0.0862077	0.0483225	0.136618	-0.0923602	-0.147279	-0.0610404	0.298491	0.0836931
0.252675	-0.0458196	-0.0615408	0.280105	-0.118239	-0.078761	0.0375774	0.0238995	0.140496	-0.177278	-0.0742208	-0.290398	-0.0522074	0.280191	0.0618551	0.0715277	-0.331552	0.071378	-0.113176	0.0705713	0.366775	0.0404554	0.342304	-0.159546	0.313244	-0.0585612	0.00443815	-0.286279	-0.156193	-0.615527	0.151725	-0.159998	0.00259726	0.201691	0.198509	0.109585	0.00617066	-0.0414189	-0.176973	-0.0366482	-0.110697	-0.17598	-0.139393	0.122655	0.00471403	0.237999	-0.0353775	0.0416135	-0.294094	0.0866028
-0.0720218	0.212681	-0.0116733	1.67396	-0.110051	-0.0486014	-0.0696325	-0.121013	0.133577	0.145065	0.0674552	-0.161403	-0.210882	-0.270428	0.127043	0.224615	0.128542	-0.143502	-0.15611	-0.349649	-0.114344	0.268287	0.0882153	-0.0128473	-0.145315	-0.185813	-0.0834613	-0.276549	-0.0916952	0.326366	-0.0679959	-0.187703	0.0301993	-0.0608382	-0.222259	-0.316888	0.0256824	0.290721	0.296467	-0.148668	0.0320079	-0.144629	0.0610529	-0.140264	0.0360467	-0.10765	0.0416418	0.275914	-0.192182	-0.116152
0.147144	-0.298084	0.191457	-0.480431	-0.0954031	-0.243983	0.212827	-0.12144	0.0184128	-0.413339	0.131411	0.281339	0.247017	0.0920482	0.28293	-0.215818	-0.366172	0.0229338	-0.0566885	-0.345258	0.0449092	-0.0492205	-0.0180266	0.120671	-0.0891977	0.0450882	-0.0608834	0.23587	-0.365632	-0.380147	-0.0985044	0.137333	0.0743778	-0.148348	0.285005	-0.0100536	0.0212685	0.0858262	0.00342331	0.160341	0.103626	0.30565	-0.16685	0.125508	0.0322286	-0.0414782	0.268858	-0.0776242	-0.13604	-0.212792
0.172078	0.0612684	-0.14715	-0.0707255	0.0257925	-0.30474	-0.0900216	-0.10452	-0.253543	0.134853	-0.103787	0.221343	-0.218088	-0.21742	0.0734459	-0.0891511	0.158604	0.11272	0.178153	-0.379548	-0.0941658	-0.0897565	-0.202996	-0.125997	-0.0928924	-0.208139	-0.0690347	-0.173225	-0.287913	-0.502136	-0.332031	-0.183392	-0.145806	-0.0936784	0.186714	-0.0906597	0.0813952	-0.0398976	0.221706	-0.034621	0.0932124	0.294762	0.070151	0.057117	-0.226964	-0.115383	-0.245025	-0.0882542	-0.150198	-0.173718
0.152164	0.280438	0.200083	0.954081	0.216049	-0.323981	0.17312	-0.107058	-0.10532	-0.333807	-0.113766	-0.00399189	0.0307008	0.277268	0.244107	0.142956	-0.359825	0.0202941	-0.160349	0.133294	0.0139248	-0.0588216	0.368981	-0.133928	0.0467339	-0.0292488	-0.142886	-0.121157	-0.344888	-0.507466	-0.227814	-0.212307	0.155698	-0.113318	-0.0927475	0.118179	-0.0779433	0.0581595	-0.157841	-0.119863	-0.394621	-0.11718	-0.354719	0.114318	-0.0154444	0.217152	0.145605	0.276894	-0.124551	0.0859834
-0.431963	-0.0274568	-0.0479302	-0.369035	-0.12958	-0.140541	-0.050767	0.1048	0.174622	0.134743	0.0856182	0.177558	0.0193095	-0.0508796	0.0474521	-0.264557	0.161227	-0.125923	-0.302458	-0.243979	-0.134453	-0.103012	0.137722	0.135736	0.0421072	-0.034908	0.155407	-0.313513	0.189163	-0.518713	-0.0344423	0.175322	-0.104723	-0.099852	-0.0576295	0.0633561	-0.105901	0.100808	0.268253	0.197304	0.0517492	-0.124866	-0.295191	-0.154377	0.0685349	-0.119672	-0.0267955	-0.0787616	0.215441	0.115581
0.194923	-0.20574	-0.015907	-0.362278	-0.00189295	-0.321953	-0.088076	0.130272	0.124327	-0.165852	-0.11324	-0.120677	0.213728	0.309082	0.104591	0.120426	0.0636889	0.00646578	-0.356294	-0.343929	-0.098446	0.0246079	0.33053	-0.0464378	0.326075	0.086015	0.0121788	-0.116225	-0.312384	0.416573	-0.338051	-0.117785	0.067536	-0.11132	-0.142964	-0.0539086	0.0611221	-0.034857	0.245177	0.152197	0.124033	0.0718785	-0.335346	0.115567	-0.216385	-0.00462404	0.343894	-0.0870122	-0.156119	-0.251013
-0.432418	-0.220217	-0.0467664	0.116774	0.271054	0.148272	-0.086915	-0.132781	-0.0271561	-0.196248	-0.17923	0.157957	-0.235187	0.252796	-0.238224	-0.213883	0.179384	-0.445763	0.0077672	-0.292082	0.00631924	-0.111494	0.0618375	-0.0416534	-0.0474423	-0.0458202	-0.0937093	0.172133	-0.0212475	-0.550673	-0.0988383	-0.183756	-0.165463	-0.049327	0.208898	-0.33505	-0.051295	0.226988	-0.092863	-0.0737555	-0.0157062	0.297796	-0.156483	0.0348984	0.0457134	-0.167333	-0.189716	-0.0874405	0.194022	0.0799908
0.21018	-0.239558	-0.174085	-0.394738	-0.120719	-0.298948	-0.118194	0.0940203	-0.0348397	-0.0739239	0.0643784	-0.317778	-0.00141149	-0.133653	-0.20016	0.0954364	-0.37051	0.0276694	-0.416447	-0.224668	-0.0957316	-0.0232605	0.165316	-0.0357297	0.0435488	0.0633662	0.0675376	0.297248	-0.323588	-0.123011	0.1376	0.0876695	0.120042	-0.184589	-0.000140077	-0.357903	0.0782281	0.271602	-0.157617	0.15473	0.0887305	-0.313254	-0.216831	0.0925299	0.114063	0.0791621	-0.0871028	0.0565213	-0.276098	-0.216962
-0.0421225	-0.0447444	0.149043	0.116289	0.209712	-0.0909624	0.140937	-0.0800214	-0.216643	-0.213389	-0.0881618	-0.146894	-0.0521328	-0.22353	-0.171654	-0.016558	0.0204798	-0.0738141	-0.134213	0.0294883	-0.102393	-0.0810963	0.345258	0.157975	-0.132126	-0.0400015	-0.071737	0.227964	-0.304278	-0.472075	-0.199849	0.175366	-0.142269	-0.07551	-0.0609057	0.0995513	-0.0835091	0.00241229	-0.0520655	0.0979784	-0.353077	0.0884647	-0.362645	0.081019	0.00216836	-0.169549	0.284836	-0.0768601	0.37527	-0.194189
0.250031	0.235926	-0.216037	-0.510203	-0.102355	0.126385	0.152617	-0.120035	0.172788	-0.381123	0.093852	-0.170157	0.00270302	0.247106	0.102044	-0.129543	-0.287472	0.00903973	0.0161635	0.0553269	-0.117621	-0.0629915	0.101297	0.0404948	-0.0431068	-0.00769435	-0.157497	-0.113598	-0.0844254	-0.658141	0.161073	-0.223334	0.0676543	0.481316	0.196285	-0.393435	0.0709691	0.279573	-0.101449	-0.15811	-0.241109	0.0732351	0.0809003	-0.128	0.0286547	0.000936461	-0.0225209	-0.0698366	0.102588	0.0866514
-0.080764	0.166019	0.000569207	-0.454886	0.0362371	0.0844578	0.164638	-0.0697688	0.0771891	-0.166329	-0.00353597	0.120847	-0.234893	-0.188677	0.0254937	-0.243966	-0.300766	0.0774444	0.0315044	-0.422118	0.387261	-0.0686576	-0.0228932	0.102002	-0.135088	-0.0237436	-0.101377	-0.202679	0.258457	-0.317082	0.11613	0.240105	0.0589379	-0.0446032	-0.165448	0.0616827	-0.0815232	-0.0778352	-0.0602786	-0.0656049	0.106922	0.112448	0.105223	-0.0974978	0.034628	0.272637	-0.380759	-0.0584319	-0.224468	-0.000406948
0.3576	-0.316425	0.329014	-0.185074	0.0937615	-0.0988169	-0.111722	-0.159444	0.191933	-0.122647	-0.0680481	0.33109	0.0196506	-0.122453	-0.181119	0.130098	0.316775	0.0773978	-0.0702112	-0.428853	0.0302879	-0.0762515	0.102382	-0.0331515	-0.16986	-0.265603	-0.164778	-0.0203968	-0.100792	0.22223	-0.101749	-0.201472	0.0436841	-0.1428	0.187597	0.241489	-0.009631	0.12899	-0.187012	-0.0386627	-0.075842	0.0698772	0.132334	-0.0300049	0.0131298	-0.155111	-0.0201827	0.285341	0.166774	-0.00027299
-0.166546	0.21507	-0.0639156	-0.235482	-0.110272	0.166668	0.147748	-0.078472	-0.0434502	0.180255	-0.220187	-0.0687281	-0.154319	0.363934	0.0476683	-0.17426	0.23566	0.162574	-0.00554838	-0.3412	-0.127028	-0.133724	-0.170319	-0.210052	-0.036776	-0.220115	-0.061699	-0.126838	-0.137709	-0.605855	-0.124815	-0.122676	0.0259801	-0.101004	-0.0823482	-0.0604899	-0.0368181	-0.234894	-0.116834	-0.170848	0.0509765	-0.15838	-0.278203	-0.0581348	-0.177124	0.105952	-0.202153	-0.0902557	-0.200237	0.0721018
0.118807	-0.26622	-0.167027	-0.510514	0.246202	-0.402113	0.0465864	-0.110618	-0.182467	0.139229	0.0890505	0.377625	-0.0881418	-0.20963	0.0350061	-0.0324124	0.252531	0.0315967	0.0666867	-0.369438	-0.0661353	-0.0789441	-0.121607	0.316536	-0.0283469	-0.171858	-0.0585428	-0.165521	-0.335907	-0.0188769	0.116993	0.0593892	-0.145785	-0.176902	-0.148684	-0.0760555	-0.068518	0.00536161	0.199234	0.237844	0.050998	0.204626	-0.0713983	0.0973038	0.0786169	0.0491095	-0.0313862	-0.075937	-0.244024	-0.206854
0.264429	-0.283157	-0.157959	0.910562	0.0949488	-0.386322	-0.0989039	0.0900282	-0.0695428	-0.115226	0.0834445	-0.0995748	0.0781248	-0.223839	0.0298948	0.00544641	-0.194099	-0.0297529	-0.268241	-0.14003	0.0387843	-0.0637146	-0.278617	0.258785	-0.159838	0.28289	0.0908937	-0.105299	-0.130635	-0.479545	0.126743	-0.213563	0.13349	-0.168307	-0.210146	-0.246976	-0.0137966	0.00326085	-0.163002	-0.0889828	0.106968	-0.0885106	-0.348487	0.111683	0.0790913	-0.103542	0.149985	0.0674919	-0.199181	-0.187196
-0.285508	0.098143	-0.07561	-0.472853	-0.0179353	-0.0858251	-0.105499	-0.107181	-0.297801	0.165706	-0.152371	0.0556802	-0.0962132	-0.118908	0.0165693	-0.211006	0.226217	0.107982	0.270354	-0.363484	-0.151777	-0.120161	0.130601	-0.0361492	-0.00574287	-0.0509259	-0.11259	0.143394	-0.265745	-0.0209053	0.120297	0.368308	0.214499	0.409892	0.0210922	0.0820825	-0.094629	-0.278562	0.230398	-0.0616707	-0.455006	-0.163933	-0.0807735	0.0270238	-0.0103967	-0.170083	0.15897	-0.0747007	-0.179794	0.122995
0.331271	0.155322	0.24197	0.633433	-0.1584	0.218836	0.125755	0.091487	-0.308087	0.20951	0.148447	0.253744	0.352167	0.21267	0.102241	-0.263346	0.122498	0.160529	0.189315	0.0685446	0.143852	-0.0335762	0.0729468	0.278422	-0.0730526	0.0449838	-0.0827632	0.210233	0.320318	1.45398	0.13688	0.0816183	0.100608	0.358454	0.195371	0.167557	-0.00173208	0.0269512	0.235501	0.00346133	-0.158318	0.28871	0.14039	0.0824558	0.0233926	-0.0752425	-0.332136	0.0363849	-0.22596	0.152645
0.138267	0.011993	0.178782	-0.513279	-0.114634	-0.100274	0.157653	0.103269	-0.28747	0.169511	-0.0964573	-0.281841	-0.368587	-0.054956	-0.158028	0.086317	-0.18837	0.10069	0.112725	-0.287353	0.0174118	0.300627	0.198485	0.00319382	-0.0597229	-0.0477422	0.132058	-0.345769	-0.177414	-0.602111	0.113873	0.0520193	0.0545345	-0.130745	-0.130162	0.10054	0.0930309	-0.293709	0.281425	0.162511	0.128582	-0.0997307	-0.0966972	-0.065496	0.0482067	0.121983	0.202762	-0.0942445	-0.166447	0.0733445
-0.119676	-0.137868	-0.0778862	-0.475424	0.00335107	-0.115447	-0.086737	0.0168633	-0.229779	-0.0323181	-0.17895	-0.112314	-0.0951346	-0.0893551	-0.202495	-0.1832	-0.358566	-0.376613	-0.0140947	-0.306116	-0.0173597	0.329525	-0.0435166	0.208717	0.0163617	-0.0283799	-0.153418	-0.300288	-0.330434	-0.51244	-0.0147044	-0.118751	-0.0974241	-0.10123	0.0601038	0.119981	-0.00578175	0.026167	0.291685	-0.0180566	0.0917055	-0.139606	-0.311172	0.0453101	0.0189273	-0.150498	-0.182586	-0.0794641	-0.217204	0.0711236
-0.322276	-0.337135	-0.0535203	-0.303091	0.0421806	-0.113596	-0.127509	0.0266542	0.192561	0.147655	-0.145303	0.242459	-0.110083	-0.222888	0.0958385	-0.00710338	0.24363	-0.406016	0.0856294	-0.4258	0.0556249	-0.0862821	-0.219738	-0.0680769	-0.162984	-0.00881176	-0.0967168	-0.120691	-0.235727	1.24742	-0.0613779	0.133961	-0.124949	-0.12647	-0.0580845	0.136081	0.0177241	0.0763088	0.238427	-0.13418	0.0908557	0.268853	-0.125961	0.138274	0.0183236	0.0385518	0.140906	-0.0726363	0.252028	-0.214813
-0.263621	-0.360458	-0.204176	0.540872	0.0267934	-0.267879	-0.0672722	0.0786579	0.241736	0.161752	0.0676487	-0.162939	0.0780646	-0.0698068	0.259394	0.0627977	-0.14054	-0.34004	-0.0333862	-0.0736858	-0.0934944	0.332103	-0.319102	-0.0356014	-0.0349233	-0.0240466	-0.0987403	-0.135115	-0.264464	0.309592	0.114974	-0.189177	-0.0773629	-0.0587132	0.293548	0.116896	0.11434	-0.0245327	0.216688	-0.0879605	0.103127	0.259664	-0.289809	0.129547	-0.188631	-0.119791	-0.207222	-0.0738491	-0.162646	-0.190009
-0.351609	-0.266606	-0.238918	-0.269497	-0.147159	-0.0871436	-0.0822599	-0.0927414	0.213836	-0.175264	0.043002	-0.0949179	0.0133358	-0.16938	0.0662318	-0.215698	0.269271	-0.446053	0.145014	0.319563	-0.106923	-0.0809897	0.403373	-0.0684771	-0.0329987	-0.0536958	-0.160619	0.140232	-0.111006	-0.378185	-0.0513366	0.0150842	0.224909	-0.11066	-0.148683	-0.0376823	-0.0221904	0.0719495	0.295268	-0.0893168	0.104188	0.115919	0.0915203	0.12133	0.0982716	0.05015	0.137288	0.0595404	-0.14184	-0.220902
0.239928	0.0365955	-0.0517332	0.585439	-0.13236	0.346329	-0.0413603	0.110173	0.0253433	-0.149394	-0.0679434	0.369493	0.0870395	-0.148554	0.272802	0.184491	0.197113	0.132794	0.197567	-0.154597	-0.0388927	0.246962	-0.178039	0.158375	-0.169702	-0.206471	0.0957411	0.23824	0.295928	0.873194	0.155319	0.250887	-0.125247	0.347032	-0.152874	0.239875	0.0812494	-0.0582774	-0.129472	0.214976	0.0970842	0.116478	0.162867	0.107845	0.0616009	-0.02599	0.00244573	0.23284	-0.255464	0.130329
-0.46946	-0.177935	-0.201231	-0.510568	-0.123195	-0.107724	-0.117603	0.0744935	0.231425	-0.301833	0.070502	-0.245332	-0.0986214	-0.100304	-0.128594	0.0866517	-0.33505	-0.0418299	-0.173885	-0.0101237	-0.0921529	-0.0641431	0.15065	-0.205969	0.0330514	-0.03628	0.108364	-0.279031	-0.255733	0.396001	0.101306	-0.210921	0.0136166	-0.12744	0.0637617	0.17372	0.114618	-0.262211	0.0346936	-0.0504412	0.101516	-0.295005	0.0673137	-0.138541	0.0560464	0.0846316	0.187663	-0.0696064	-0.268124	-0.222408
-0.250689	-0.172319	-0.156188	1.42124	-0.00530625	-0.392618	-0.0728534	0.0685895	-0.173618	0.148534	0.0905	-0.313629	-0.171842	0.27328	-0.238561	0.182736	0.315934	-0.360505	-0.290311	-0.269295	0.0851855	-0.0710693	0.40549	0.236354	-0.112342	0.259538	0.0629141	-0.120073	-0.0146053	-0.524718	0.119506	-0.149008	0.11398	-0.124012	-0.150686	-0.0769729	0.083374	-0.237451	0.251107	-0.00384916	0.0895815	-0.285717	-0.157761	0.0338068	-0.177592	-0.123579	0.18102	-0.0714949	-0.13148	-0.147981
0.182067	0.166949	0.307877	1.64278	0.277387	-0.394946	-0.0531885	0.100507	0.243271	0.173028	0.012924	0.313887	0.352085	-0.082245	0.105134	0.302482	0.148903	0.216708	0.0513731	0.488997	0.122002	0.149751	0.211986	0.291965	0.0693318	-0.0184887	0.126573	0.284659	0.197176	-0.560812	0.10268	0.289414	-0.134403	-0.0774628	0.128803	0.253199	0.110125	0.342667	-0.0776546	0.00187276	0.126523	0.240669	0.0656313	-0.0319414	0.0892997	0.188155	-0.0190217	0.258341	0.302997	0.147064
0.398304	0.103968	-0.0726093	-0.155316	-0.143146	0.0716298	-0.0675824	0.0564877	0.0172213	-0.123454	0.0224059	-0.268609	-0.0610673	-0.198375	0.193178	-0.19304	-0.156828	0.155394	0.110458	-0.0371711	0.269171	-0.106867	0.0489899	0.0132006	-0.180056	-0.0577601	0.120763	-0.144346	-0.109065	-0.597149	0.106672	-0.189276	0.0434862	-0.147671	-0.11059	-0.141574	0.0787733	-0.0483107	-0.193884	-0.146982	0.105113	-0.174056	-0.163077	-0.277831	0.0430468	0.215293	-0.39701	-0.0832003	-0.0709966	-0.174821
0.169368	-0.192554	0.345113	-0.500968	0.0385583	0.124211	-0.114965	-0.0630693	-0.217639	-0.305272	-0.214406	-0.128774	-0.0165221	0.234518	-0.222439	-0.15806	0.2305	0.00442015	-0.0409724	-0.366167	-0.110251	-0.0922931	-0.0764751	-0.0288236	-0.043499	-0.0357558	-0.121256	-0.274009	0.210025	-0.121583	-0.239128	0.079368	0.141531	-0.128185	-0.145648	-0.105229	0.0503341	0.0999703	0.286679	0.0248966	0.103974	-0.110987	-0.215246	0.0832116	0.0185022	-0.152259	-0.0607772	-0.0742217	-0.226436	0.0838269
-0.447341	0.0910255	-0.172027	0.121926	-0.153723	-0.131751	-0.0733085	0.0754748	0.176218	-0.202963	-0.0329692	-0.102965	-0.0649027	0.188584	-0.210423	-0.28633	0.287026	0.119937	-0.154578	0.0230435	0.0655761	0.339654	0.100787	0.0119948	-0.0975719	-0.072358	-0.0990012	-0.0730319	-0.112475	-0.48325	0.0934316	-0.202131	0.167663	-0.0946529	-0.108406	0.134652	-0.0466434	-0.037214	0.348536	-0.0693571	0.140909	-0.179561	0.00827479	-0.100751	-0.229661	-0.0862089	-0.168022	-0.072534	0.382804	0.101194
-0.184164	-0.125705	0.192662	-0.21518	0.263012	-0.307212	-0.117086	-0.0965527	-0.216214	-0.121253	-0.155822	0.199646	-0.0414729	-0.186144	-0.206626	0.0243435	0.331354	-0.0605703	-0.028833	-0.38286	0.0860888	-0.0831164	-0.0569117	0.153817	-0.118187	-0.0431106	0.123716	-0.14343	-0.272019	-0.528986	0.119485	-0.21414	0.183955	-0.146004	0.0554049	0.127525	0.108078	0.36906	0.313464	-0.166818	0.114025	-0.12679	0.0438608	0.102661	0.0770244	-0.128026	-0.0699428	-0.0841135	-0.224483	0.0633013
0.148308	0.207523	-0.0678823	-0.478713	-0.144153	-0.239443	-0.116645	-0.0447271	0.0899591	0.199695	-0.0844224	0.185925	-0.0275754	-0.143696	0.255661	0.0573509	-0.330525	0.113563	-0.118882	-0.427308	0.00963866	-0.0676556	0.170047	-0.0368132	-0.143188	0.0170385	-0.0957233	-0.163948	-0.406177	-0.433674	-0.0988141	-0.246619	-0.0894781	-0.135356	-0.247582	-0.0844089	0.0535195	0.0784593	0.308362	-0.072221	0.152005	-0.116523	-0.187595	-0.111905	-0.176801	-0.0249622	0.00806959	-0.0730254	-0.157639	-0.200407
-0.230607	0.0243172	0.15095	1.57825	0.218117	0.296895	0.163919	-0.0916741	0.23195	0.0265112	0.131514	0.33047	0.0955992	-0.244609	0.18699	0.299224	0.00755704	0.0360189	-0.0840119	0.0630464	-0.0881023	-0.0466636	-0.166815	0.300821	-0.198662	0.0334759	0.107719	0.270143	0.205367	1.17184	0.150389	0.246296	0.0254287	0.195278	0.24101	0.295085	0.093058	0.25549	-0.126388	-0.18603	0.112445	-0.124194	0.118845	0.13499	0.0602362	0.176739	0.168091	0.0315983	0.309643	0.151409
-0.134681	-0.28371	-0.0549241	-0.51803	-0.0966408	0.10082	0.023683	-0.0722828	0.246006	0.194369	-0.128265	0.0974042	-0.0133583	-0.182316	-0.149544	-0.210441	-0.237593	0.0135882	0.0351304	-0.305046	0.0441975	-0.0865019	-0.193543	-0.0106765	0.0100772	-0.0162865	0.101911	-0.320536	0.21956	-0.552225	0.17702	0.271504	0.247909	0.502619	0.0289395	0.192223	-0.090762	-0.320607	0.183893	0.228796	0.134177	0.295959	0.163892	0.120519	0.0794997	0.0239806	-0.239787	-0.0718412	0.0703618	0.122798
0.199711	0.266876	-0.0257816	1.08026	0.0592353	0.380032	-0.097101	0.0252247	-0.149433	0.160125	0.112595	0.336603	0.0131543	-0.151305	0.251097	0.304391	0.117872	0.126856	0.214224	-0.0657421	0.0099897	0.163699	-0.350586	0.261733	0.214361	-0.0160166	0.0359372	0.202463	0.339908	1.92434	0.103662	0.203882	-0.13296	-0.0658978	0.107678	0.245011	0.0776075	0.127418	0.152329	0.191266	0.114356	0.152546	0.346122	-0.337025	0.0533811	0.0512712	0.0303636	0.24119	-0.0876596	0.138899
-0.152477	-0.1823	-0.0601933	-0.120458	-0.0372738	0.379687	-0.0527892	0.138777	0.00640351	-0.100559	0.108411	-0.178036	0.253702	-0.146256	0.0441192	-0.192892	-0.325685	-0.355371	-0.081036	0.626329	-0.104822	-0.063268	0.0341054	-0.175854	-0.174778	-0.113845	0.112776	-0.139971	-0.34447	-0.561194	-0.300823	0.179325	-0.0846914	-0.0940435	-0.119965	0.147555	0.0829133	0.144979	-0.209058	-0.159072	0.0375562	-0.119708	0.0983145	0.0658932	-0.237417	0.0726033	0.120689	0.0508928	-0.120607	-0.190425
-0.181364	0.0796757	-0.0342018	-0.425351	-0.180275	0.0983954	0.161817	0.110851	-0.216546	0.165666	0.147193	-0.306966	-0.107312	0.213548	-0.178564	-0.139059	0.168293	0.115488	-0.0716112	0.162673	0.0457826	-0.116575	-0.00888013	0.0454217	-0.110253	-0.0114591	0.0596735	0.368396	-0.0398203	-0.0752661	0.0809775	0.0243402	-0.151459	-0.0660149	-0.141961	-0.0760254	0.00461173	-0.350915	0.057006	-0.0402808	0.023725	0.148391	0.102537	-0.0693964	0.0644972	-0.152591	-0.388458	0.046844	-0.185463	0.148421
-0.42677	0.0539646	-0.0540216	-0.298977	-0.0708733	-0.15927	-0.0872807	-0.0634083	0.239513	-0.0223342	0.181361	-0.0956279	-0.159366	-0.161876	-0.210661	-0.232807	-0.324738	0.120671	-0.0132248	0.0939581	-0.0469439	-0.0971077	0.125	-0.165092	0.0410901	-0.041353	0.074286	-0.171054	0.210557	-0.366628	0.146965	0.0478791	-0.0373231	0.357116	0.207405	0.222775	-0.0880023	-0.325275	0.25063	-0.0621733	0.127161	0.192407	-0.144433	0.132729	0.0308703	-0.171069	-0.169797	-0.0749417	-0.199062	0.1367
0.267445	-0.152592	0.0147157	-0.0110201	0.31068	-0.42915	-0.0724351	0.0892288	0.236896	-0.0654018	0.0935527	-0.341904	0.212539	0.311827	-0.209387	0.270962	0.178147	0.209107	-0.420206	0.263654	-0.0707779	-0.0477707	0.295653	0.293549	0.0755169	0.230541	0.130829	0.236878	-0.33973	1.65388	0.117854	-0.128918	0.037637	-0.121664	0.19951	0.217963	0.130567	0.21376	-0.110827	-0.00988917	0.118823	-0.0912191	-0.351877	0.0856471	0.0456377	0.180679	0.344351	0.261402	0.228347	-0.250049
0.196665	-0.386998	0.148444	0.282735	-0.119793	-0.0772129	0.162682	0.099561	0.112765	-0.131488	-0.0523053	-0.0941801	0.230221	0.246874	0.08265	0.254091	-0.338525	0.0598618	-0.0362644	0.109803	0.2976	-0.0595484	0.286081	0.149259	-0.140853	0.231617	0.102922	0.228479	-0.349047	1.69213	0.156517	-0.107732	0.0433842	0.262859	0.179382	0.251091	0.0966742	0.283639	0.227625	0.154378	0.0550935	-0.0468568	0.0783654	0.143384	-0.188766	-0.155099	0.136822	-0.0760109	-0.0731338	-0.28226
0.168926	-0.146555	0.215931	-0.449278	-0.0840213	-0.0972157	0.21912	-0.110522	0.0124773	0.146065	0.0850052	0.110758	0.0971955	-0.291792	0.189465	-0.190004	0.159908	0.109824	0.25265	-0.277093	0.018337	0.303152	-0.290146	-0.317607	-0.158003	-0.0128164	0.115653	-0.0435047	0.287775	-0.04598	-0.126908	0.254576	-0.105242	0.343588	0.0889711	-0.235846	0.0437298	-0.217397	0.189799	-0.0338739	0.140642	-0.0409274	0.0842584	0.114417	0.0112055	0.0248743	0.024327	-0.0746275	-0.00848511	0.101628
-0.309157	0.0778828	-0.0543585	-0.453872	0.34458	-0.119038	-0.119852	-0.119234	-0.269605	0.116691	-0.157397	0.0587055	-0.0658622	-0.2559	-0.20352	-0.00177133	0.154325	0.179554	-0.0431764	-0.386616	-0.120384	0.347092	-0.26329	0.00199068	-0.100096	0.0292272	-0.0972092	0.230293	-0.287273	-0.498126	0.0978119	0.315143	-0.102514	-0.162191	-0.178129	-0.051193	0.000826072	-0.0808872	-0.0356771	-0.208185	0.0325117	-0.135204	-0.212282	0.0352774	0.0110197	-0.155163	-0.159415	-0.0812197	-0.133138	0.0948771
0.112949	-0.257677	0.117764	-0.52825	0.24687	0.0841962	-0.132364	-0.128764	-0.017217	0.113512	-0.135747	0.316257	-0.0466506	-0.214082	0.241465	0.0248479	0.171494	0.0592362	-0.206445	0.113679	0.0747724	-0.0904466	-0.252441	-0.0179749	-0.0985178	-0.0170806	-0.128968	-0.130354	-0.0842115	0.391924	0.139649	0.134735	-0.173755	-0.0509892	-0.184748	-0.0940135	-0.0146619	0.228832	0.233312	0.155025	0.096789	-0.118563	-0.25386	0.0998129	0.00684955	0.0526895	0.106093	-0.0778924	-0.27199	0.100949
-0.167614	0.252692	-0.0773178	0.872239	-0.112359	-0.310786	-0.0819291	-0.0772575	0.118568	-0.0377631	-0.0503682	-0.306524	0.291691	-0.107692	-0.249038	0.0406486	-0.28775	0.115618	-0.140717	-0.0987911	-0.00560647	-0.0598877	0.0639187	-0.207817	-0.151067	-0.045402	-0.117434	-0.186522	0.209069	-0.631869	0.174309	-0.20392	-0.0807715	0.056808	-0.0137873	-0.34539	-0.0938947	0.0786357	-0.235555	-0.144552	0.0916851	-0.251362	-0.22102	0.102293	-0.266978	-0.152541	0.0874642	0.278205	0.484699	0.0870362
0.19585	0.0333937	0.131585	-0.517548	0.0320531	-0.309127	0.170472	-0.153268	0.232108	-0.116982	0.00162015	0.180195	0.071066	-0.186074	-0.0251538	-0.318291	0.250311	0.0411463	-0.0598536	0.128215	-0.128521	-0.0733703	-0.202241	0.281376	-0.082512	-0.0350974	-0.0857702	0.207175	-0.235739	0.457907	-0.261068	0.138714	-0.151992	-0.100062	0.0395071	0.0889331	0.115261	-0.0552637	-0.122209	0.140981	0.138846	0.213036	0.0936989	-0.119378	0.01826	-0.161645	0.135808	-0.0854659	-0.245793	-0.268712
-0.481615	0.0515721	0.340967	0.536392	-0.12593	0.159704	-0.0865417	-0.0741998	-0.0304672	0.231606	0.113711	-0.196759	0.0652954	0.323566	-0.197806	0.109968	-0.307416	0.0965735	-0.302891	0.231574	-0.105885	-0.0804446	0.0787142	-0.217194	-0.147446	0.27825	0.11113	-0.194063	0.259474	-0.560685	-0.309266	-0.187528	-0.0908342	-0.0768239	-0.00133863	-0.454684	0.00455932	0.0947391	-0.062184	-0.0262411	0.170996	0.151562	-0.105548	0.119167	0.0744008	0.065672	0.158607	-0.0450942	0.0314722	0.0688812
0.184809	-0.31839	-0.0487991	-0.378276	-0.137055	-0.110225	-0.0874326	-0.0998364	0.155031	0.126107	-0.0571469	-0.190174	-0.287339	-0.216106	0.0364118	-0.221572	-0.0804268	0.110826	-0.0518208	-0.358791	0.269432	-0.0490876	-0.267094	-0.0599811	-0.0227811	-0.0118428	0.108431	-0.117144	0.259568	-0.415225	-0.106421	0.198241	-0.117324	-0.0813964	0.275454	-0.148637	0.0991332	0.337224	0.189627	0.183432	0.133562	-0.130872	0.120233	0.103533	-0.203167	-0.105085	-0.0224029	-0.0657737	-0.121678	-0.227981
-0.432228	0.226248	-0.0276322	-0.055192	-0.138485	-0.00847508	0.141003	-0.0380134	0.169414	0.137332	0.144854	-0.458451	0.214419	0.246242	-0.210289	0.336159	-0.236149	0.127391	-0.299731	-0.152406	-0.11263	-0.09351	0.322262	0.0727944	0.183483	-0.0200363	0.0500112	-0.136313	0.23631	0.120306	0.136303	-0.134157	0.0216951	-0.0913421	0.231649	0.232434	-0.108648	-0.315221	-0.140357	0.0695457	0.121329	-0.262755	-0.304068	-0.117902	-0.0705911	-0.167869	-0.210871	-0.0663124	0.0803156	-0.281334
0.298369	0.025995	-0.0657551	-0.509934	-0.0944156	-0.0564754	-0.0799355	0.102017	0.00288274	0.145105	-0.0925958	-0.387103	-0.252547	0.165278	0.129874	0.208628	0.244478	-0.417245	-0.30086	0.174244	-0.104756	0.336429	0.0933932	0.201318	-0.125345	0.00099395	0.052441	-0.338629	-0.322337	-0.461974	0.107215	0.0614199	-0.0760149	0.218284	-0.0619742	0.177492	-0.053856	-0.0139029	-0.00386576	0.144764	0.103858	-0.229244	-0.180074	0.0497547	-0.18069	0.0130726	0.117801	-0.0709638	-0.181462	0.0291253
0.103742	0.240418	-0.187273	-0.517799	-0.126687	0.376588	0.127021	0.118523	-0.207578	0.121445	-0.0586844	-0.207537	-0.0371893	0.136505	0.241244	-0.0418478	-0.207991	0.171057	0.0206865	-0.2772	-0.00922052	0.248291	0.113515	-0.217234	-0.0246702	-0.0754519	-0.0791442	-0.0279035	-0.0905107	-0.479578	-0.334099	-0.180803	0.0513628	-0.028003	-0.090557	0.0972438	-0.0914424	0.0741194	-0.154871	-0.0765493	0.0942948	0.0407448	0.00791709	-0.25495	-0.246722	0.05867	-0.329607	0.0375709	0.385336	-0.235435
0.224216	0.0387157	-0.018076	-0.521473	0.235162	0.0328171	0.19883	-0.0402029	0.0958986	0.164787	-0.137674	0.165802	-0.322833	-0.195929	0.128073	-0.200457	0.281974	0.036327	0.199589	-0.350356	-0.0174629	-0.0445184	-0.100426	0.227941	-0.136631	0.0187472	-0.0829365	-0.176101	-0.074282	-0.346544	0.136373	-0.0136518	-0.163796	-0.161785	0.0184875	-0.0870981	0.0736831	0.258286	0.0739524	0.18825	0.149099	0.317109	-0.371764	0.0761682	0.0743057	-0.135625	-0.0229922	-0.0754918	-0.194589	0.0962672
-0.382587	-0.203638	-0.162244	-0.176013	0.241404	-0.112998	-0.0831891	0.0784789	-0.214445	0.0968969	-0.0803531	-0.18243	-0.0699798	0.102291	-0.000561097	-0.226035	0.207285	-0.405209	-0.180562	-0.106396	-0.106619	-0.0779325	0.198734	-0.0350418	-0.0607062	-0.00825074	-0.113042	0.13175	-0.270403	-0.258733	0.0803752	0.210202	0.0500633	-0.102788	-0.11981	0.140791	-0.0213759	-0.0741339	0.256883	-0.0447011	-0.421439	-0.214119	-0.353036	0.0681	-0.00902061	0.193521	0.221167	0.26539	0.32424	-0.170731
-0.0224631	0.194479	0.197578	-0.511589	-0.0402116	-0.0975105	0.122805	-0.0953441	0.168117	0.151725	-0.0369769	-0.0569352	-0.103572	-0.240479	0.285038	-0.214819	0.261609	0.168828	0.190041	-0.366264	-0.14003	-0.112496	-0.218579	0.0930226	-0.159551	-0.0380808	0.0784765	-0.154289	-0.074358	-0.458182	0.14073	0.0277046	0.0680507	0.197494	0.136759	0.110263	0.0994624	-0.338255	-0.0395468	-0.0247835	0.0665904	0.167284	0.104557	-0.12932	0.0629997	-0.0908859	-0.00341613	-0.0857769	-0.102446	-0.219992
0.083829	0.0424008	-0.0243719	1.36126	-0.155398	0.222023	-0.0788989	-0.0966927	-0.22458	0.125179	-0.0362823	-0.14124	-0.0824855	0.258565	-0.202416	0.078314	0.15453	0.204325	-0.152729	0.669349	-0.12412	0.294144	-0.19908	0.0821763	0.00517741	-0.0588147	0.145677	-0.198148	0.367398	-0.153659	0.115884	-0.15541	-0.122996	0.0269441	-0.133471	0.230418	0.0962694	0.10062	-0.1061	-0.0385109	-0.569623	-0.240845	-0.341003	0.0850959	0.0787081	0.0491999	-0.354691	0.206785	0.400604	-0.177072
0.242551	-0.208608	-0.0475143	-0.50483	-0.111255	-0.0681577	-0.102168	-0.0873532	0.284184	0.104531	0.0983614	0.328605	-0.0268286	-0.125442	0.194285	0.123991	0.306091	-0.351496	0.225475	-0.0051216	0.0523497	-0.081253	0.18051	-0.256052	0.0279824	-0.261339	0.0663192	-0.144971	-0.293445	0.926361	-0.31298	0.091037	0.212178	-0.0873456	0.241691	0.141162	0.102165	-0.0877834	0.215873	-0.0482411	0.0793564	0.260239	0.0883241	0.121642	-0.213973	0.0808497	-0.3436	-0.0680833	0.0278008	-0.207604
0.066437	0.0783343	0.18982	1.71216	0.0277008	0.117018	-0.0682894	0.111787	0.299074	0.155515	0.0913568	0.280588	-0.0375758	0.169472	-0.191839	0.151343	-0.317593	0.154217	0.0382382	0.52513	-0.0472595	-0.0554933	0.399347	0.231714	0.0321724	-0.0368756	0.114348	0.262187	-0.128626	2.00374	0.126029	-0.0974658	0.182236	-0.0589286	0.0177077	0.36249	0.0714924	0.137576	0.219487	0.0135727	0.125289	0.110101	0.340618	0.143529	-0.246524	0.215372	-0.343899	0.243761	0.381227	0.161555
0.222098	0.235675	-0.0586294	-0.491627	-0.149952	-0.0969417	-0.102022	0.168029	-0.0514385	-0.26216	-0.164085	0.24363	0.338877	-0.0900473	0.0991249	-0.252991	0.095673	-0.34911	-0.0222664	-0.336841	7.2049e-07	-0.0717033	0.0739313	0.134667	0.0365749	0.0203853	0.12294	0.17025	-0.376598	-0.331386	-0.0934621	-0.229214	-0.0952252	-0.169831	-0.19183	-0.217401	0.0551915	-0.0610289	-0.208125	-0.105224	-0.0174719	-0.090616	-0.165826	0.0679064	0.0555133	-0.152024	-0.349228	-0.0736873	-0.201597	-0.210491
0.0474366	0.197808	0.294924	-0.448907	-0.13391	0.095187	0.179029	0.109604	0.0330646	-0.117884	-0.000647551	-0.238611	-0.100083	-0.213791	0.0307834	-0.20521	0.234034	0.129511	0.0220107	0.0430871	0.301125	0.324635	-0.0319634	0.192032	0.0540524	-0.0307901	0.112488	0.193947	0.391891	-0.51221	-0.0351435	-0.201325	-0.156342	-0.131108	-0.123287	0.203606	-0.0937238	0.228962	-0.0160868	-0.0447786	0.131985	0.146786	0.131909	-0.04356	0.0325655	0.0374646	-0.0164825	-0.05647	-0.2298	0.116252
0.18231	0.0918701	0.213848	-0.248921	0.293378	0.211275	-0.0662856	0.160709	0.188267	-0.114133	-0.0467089	0.285239	-0.0875017	-0.271772	0.0507356	-0.269428	-0.0243415	0.192643	0.0972577	-0.0869869	-0.0579443	-0.0726955	-0.29903	-0.214323	0.0517855	-0.204249	-0.188767	-0.0322656	0.140652	-0.631822	-0.036921	-0.204874	-0.0790463	-0.175408	-0.0918709	0.122085	-0.0452069	-0.0702052	-0.0982858	0.18717	0.0992537	-0.145589	0.0540486	-0.167438	0.00573933	-0.0339808	-0.0905932	-0.0643661	0.326455	0.112021
-0.0776581	-0.188581	-0.0805788	-0.38379	-0.0492634	-0.0863445	-0.0744834	-0.100898	-0.0440747	0.0382559	-0.0139136	-0.0132293	-0.013582	-0.154766	0.244227	-0.15583	0.287708	0.0969718	0.218316	-0.356313	-0.114166	-0.00907717	-0.312262	-0.0110732	-0.109723	-0.140097	-0.0873294	-0.179505	-0.0670353	-0.39972	-0.3082	0.136379	0.0495522	-0.0679304	0.227731	-0.289642	0.082133	0.322566	0.272464	-0.0435043	0.118906	0.204519	0.41748	0.100426	0.0836661	0.0436128	0.13429	0.0243663	0.0831651	-0.212394
0.161877	0.193148	-0.0417108	-0.56895	0.254674	0.292107	-0.0335182	-0.0799642	0.17709	0.167439	0.139361	0.235325	-0.253506	-0.261656	0.32582	-0.25701	0.155781	-0.361438	0.205124	-0.361033	0.0272458	-0.0803534	-0.219115	-0.157272	0.0494683	-0.0761283	0.0066872	-0.250529	0.239175	-0.524942	0.171772	0.0637253	0.0934	-0.124753	-0.178998	0.0323247	0.000480035	0.220279	-0.00916865	-0.0713916	0.0784256	0.0754836	0.114093	-0.0859657	0.0190724	-0.0923752	-0.0820865	-0.0835391	-0.222268	0.103275
-0.359788	-0.209853	-0.0836793	-0.487865	-0.161756	0.453458	-0.0623164	-0.0985148	-0.193904	-0.182752	-0.0127866	-0.232714	-0.0516601	0.245609	-0.177154	0.270512	0.279867	-0.404406	-0.0813761	0.067104	-0.140977	-0.111407	0.40289	-0.185399	-0.050371	-0.032501	0.0876079	-0.277493	-0.280026	-0.472611	-0.0575599	-0.178375	0.065021	-0.0625059	-0.100652	-0.053776	0.00167608	0.0796924	0.229733	-0.00946162	-0.362195	-0.217161	0.0966906	-0.123103	0.0379408	0.00243966	-0.164438	0.0501504	-0.233562	0.0304514
0.204553	-0.164121	0.155804	1.48764	-0.0767994	0.287449	-0.0636364	0.11888	0.232811	-0.0751318	0.142998	-0.107607	0.295411	0.264364	0.180667	0.279571	0.0187335	0.103917	-0.115208	0.480584	-0.080409	0.0119186	0.189699	0.137812	0.0655882	0.209233	-0.170298	0.219046	0.273511	1.89838	0.10779	-0.150316	0.0238513	0.274597	0.215476	0.322351	0.0570767	0.302899	-0.0840569	-0.108765	-0.398259	0.110882	0.11426	0.121487	0.0355184	0.170647	0.127422	0.215793	-0.0861593	0.161844
0.141487	0.0538475	-0.0845561	-0.564626	-0.148601	0.165691	0.187398	-0.0866425	-0.319561	0.162229	-0.152979	0.257482	0.0388838	-0.104343	0.00895952	-0.151993	0.118857	0.134899	0.183791	-0.34656	0.0361773	-0.0980827	-0.197052	-0.199283	-0.138079	-0.243184	0.0693072	-0.209965	0.243608	-0.641362	0.140291	-0.141343	0.0905909	-0.14324	-0.0912107	0.0820745	-0.0514316	-0.309379	-0.160156	-0.170759	0.0802623	0.180029	0.0903323	0.0710667	0.0805382	-0.126142	-0.331842	-0.0737522	-0.104951	-0.14006
-0.316359	0.205833	-0.0294101	-0.479799	-0.105918	-0.0590941	-0.127196	0.128717	0.130076	0.139979	-0.0569748	-0.265006	-0.0781419	-0.0288311	-0.162327	-0.00482138	0.119925	0.077308	-0.151005	-0.371054	0.0733154	-0.100748	-0.154149	-0.0471565	0.071835	-0.247092	0.107988	-0.205408	-0.0635431	0.158756	0.0739044	-0.0992287	-0.149938	0.0937469	-0.160458	-0.135511	-0.0390214	0.131106	-0.144125	0.214347	-0.388886	-0.134607	-0.302505	-0.0446987	0.00865998	-0.105009	0.0359997	-0.0721015	-0.215289	-0.0966676
0.0571552	-0.341246	-0.147188	-0.451802	-0.145813	-0.07823	0.234686	-0.107844	-0.255658	-0.172269	0.13564	0.331512	0.343038	0.22913	-0.181578	-0.0917646	-0.369581	0.106495	-0.0458598	0.582186	0.0335931	-0.0650106	0.131594	-0.0360533	-0.055506	-0.22926	0.0712885	-0.149111	0.397125	-0.0440474	0.10013	-0.116822	0.100003	-0.135978	-0.107243	-0.113526	-0.0103702	-0.168071	-0.128108	-0.0462392	-0.435023	-0.0724677	-0.0621465	0.11349	0.083232	-0.140959	0.325475	-0.0726137	0.13661	0.0750816
-0.0570243	0.284216	-0.082656	-0.525365	-0.154916	-0.0780187	-0.111556	-0.0771387	-0.185539	0.00597585	0.106091	0.104342	0.046477	0.338617	0.274361	-0.257938	-0.130045	-0.0174259	-0.136769	-0.355285	0.41997	-0.0526967	0.147906	-0.026497	0.269195	0.0562944	0.0835348	-0.13632	-0.444132	-0.375962	0.0107266	-0.1498	0.0561321	0.182586	-0.165476	0.0843568	-0.0284292	0.237698	-0.167967	-0.0842771	0.151884	-0.133936	0.0639687	-0.0975802	-0.256324	0.218723	0.0419132	-0.0740727	-0.124353	0.120344
-0.114218	-0.170303	-0.000384423	0.17046	-0.00244532	-0.120887	-0.0210801	-0.0148697	0.108874	0.147089	0.0627038	-0.15393	0.364488	-0.190811	-0.17681	0.225794	0.0113283	0.00112496	-0.225012	0.187275	-0.130134	-0.0776317	-0.0550897	0.241379	-0.03366	0.109437	0.121691	-0.0936563	0.0649777	-0.587987	0.135335	-0.237056	0.0645062	-0.117968	-0.0706955	0.178017	-0.0727547	0.0748607	-0.160024	-0.0300432	0.11539	-0.288173	-0.363252	0.0825511	0.032272	0.0732958	0.182543	0.0586913	-0.274303	-0.281016
0.371816	0.277692	0.226789	-0.544317	-0.137927	0.121854	0.0264727	-0.126236	0.0151735	-0.00410256	-0.0420525	-0.0338386	0.0361265	0.305856	0.208036	-0.191819	-0.241613	-0.329766	-0.0567517	-0.302177	-0.0471734	-0.079201	-0.0507572	-0.00322129	-0.151045	-0.043129	0.115447	-0.168408	0.214149	-0.419541	0.119081	-0.164679	-0.127741	-0.0679593	-0.191532	-0.278033	-0.0155761	0.0497684	-0.15816	-0.0596786	-0.473623	-0.0761749	-0.0836797	0.0414351	0.0413325	0.0479498	0.201726	0.0398769	0.546553	0.0587864
[truncated: 12,518 more rows]
[truncated: 1 more columns]

## Sheet: figure 2 c
y_pred	tag	smoking_status	pred_state
6.49182	Current	Current	1
6.41249	Current	Current	1
3.90883	Current	Current	1
5.59028	Current	Current	1
6.0359	Current	Current	1
-2.52881	Current	Current	0
[truncated: 43,908 more rows]

## Sheet: figure 2 d
	Genome	Smoking-related variables	Social-demographic and lifestyles	Clinical biomarkers and risk factors
[truncated: 4 more rows]

[truncated: 20 more sheets: figure 3, figure 4, figure 5 a, figure 5b, figure 5c, figure s4a, figure s4b, figure s5a, figure s5b, figure s6a, figure s6b, figure s7, figure s8, figrue s10a, figure s10b, figure s11, figure s12, figure s13a, figure s13b, figure s13c]
